# Supplementary material for: Trans-eQTLs Can Be Used to Identify Tissue-Specific Gene Regulatory Networks
Source: Preprints.org preprint supplement (doi:10.20944/preprints202401.0546.v1), 2024-01-08
Supplement: Supplementary file 1 [file supplementary]

## Sheet: Table S1
	Table S1. Characterization of independent trans-eQTLs (r2<0.05) used in this study
	trans-eQTL annotation							Target gene			Summary statistics
	rsID	A1	A2	Chr	Location (bp)	Type	Gene(s)	Gene	Chr	BP	Freq	B	SE	P	Vp
	rs9399137	C	T	6	135419018	intergenic	HBS1L;MYB	HBG1	11	5270217	0.264393	0.591735	0.018597	3.54612e-222	0.136201
	rs35340377	A	G	1	248038210	intronic	TRIM58	JAM3	11	133980358	0.282536	-0.541812	0.00828156	0	0.119015
	rs1354034	T	C	3	56849749	intronic	ARHGEF3	ITGB3	17	45376435	0.381863	-0.500624	0.011443	0	0.118317
	rs6592965	A	G	7	50427982	intronic	IKZF1	SLC38A5	X	48322782	0.449532	-0.485495	0.0139378	7.70224e-266	0.116652
	rs1427407	T	G	2	60718043	intronic	BCL11A	HBG1	11	5270217	0.157026	0.658678	0.022819	3.25656e-183	0.114858
	rs2069408	G	A	12	56364321	intronic	CDK2	MAFG-AS1	17	79887167	0.316491	0.51002	0.0116881	0	0.112541
	rs3811444	T	C	1	248039451	exonic	TRIM58	PTP4A2P2	11	133993973	0.337611	0.471557	0.0191299	3.65296e-134	0.0994555
	rs11249433	G	A	1	121280613	ncRNA_intronic	EMBP1	AL592284.1	1	144430398	0.397006	-0.450022	0.0185149	1.69805e-130	0.0969635
	rs1354034	T	C	3	56849749	intronic	ARHGEF3	PPBP	4	74853334	0.381863	-0.445637	0.00778381	0	0.0937529
	rs1354034	T	C	3	56849749	intronic	ARHGEF3	PARVB	22	44480098	0.381863	-0.402755	0.00785722	0	0.076578
	rs1354034	T	C	3	56849749	intronic	ARHGEF3	ITGA2B	17	42458210	0.381863	-0.399569	0.00788904	0	0.0753712
	rs1354034	T	C	3	56849749	intronic	ARHGEF3	SH3BGRL2	6	80377186	0.381863	-0.399547	0.00786239	0	0.0753629
	rs1354034	T	C	3	56849749	intronic	ARHGEF3	MMRN1	4	90838231	0.381863	-0.395662	0.00786859	0	0.0739047
	rs1354034	T	C	3	56849749	intronic	ARHGEF3	CALD1	7	134542241	0.381863	-0.393821	0.00787647	0	0.0732182
	rs1354034	T	C	3	56849749	intronic	ARHGEF3	PROS1	3	93642395	0.381863	-0.376636	0.0117715	1.25544e-224	0.0669678
	rs1532331	G	T	5	43116830	intergenic	LOC100506639;ZNF131	FAHD2B	2	97754969	0.316115	-0.383448	0.0183657	8.39873e-97	0.0635726
	rs55834529	G	A	6	27072542	intergenic	LINC00240;H2BC11	RNF5P1	8	38458448	0.0805697	0.643266	0.0339345	3.93245e-80	0.0613058
	rs1354034	T	C	3	56849749	intronic	ARHGEF3	CMTM5	14	23847499	0.381863	-0.358972	0.00792392	0	0.0608335
	rs1354034	T	C	3	56849749	intronic	ARHGEF3	GNG11	7	93553421	0.381863	-0.355801	0.00792843	0	0.0597636
	rs1354034	T	C	3	56849749	intronic	ARHGEF3	CTDSPL	3	37964705	0.381863	-0.355305	0.00792913	0	0.0595972
	rs2854275	A	C	6	32628428	ncRNA_exonic	HLA-DQB1-AS1	TRAV12-2	14	22356359	0.111806	0.547503	0.0360529	4.37167e-52	0.0595355
	rs1354034	T	C	3	56849749	intronic	ARHGEF3	MYL9	20	35174057	0.381863	-0.354414	0.00793039	0	0.0592986
	rs41266839	C	G	6	26409890	exonic	BTN3A1	RNF5P1	8	38458448	0.0792497	0.631653	0.0342474	5.84829e-76	0.0582273
	rs6592965	A	G	7	50427982	intronic	IKZF1	C2orf88	2	190906272	0.449532	-0.341569	0.00777814	0	0.0577404
	rs1354034	T	C	3	56849749	intronic	ARHGEF3	SAMD14	17	48197325	0.381863	-0.348648	0.00793846	0	0.0573849
	rs1354034	T	C	3	56849749	intronic	ARHGEF3	NRGN	11	124613849	0.381863	-0.348447	0.00793874	0	0.0573186
	rs11249433	G	A	1	121280613	ncRNA_intronic	EMBP1	RP11-640M9.1	1	144489054	0.397006	0.345011	0.0189203	2.72254e-74	0.0569911
	rs4761234	C	T	12	69732105	intergenic	CPSF6;LYZ	ZNF131	5	43128700	0.459799	-0.334384	0.00778683	0	0.055545
	rs1354034	T	C	3	56849749	intronic	ARHGEF3	RBPMS2	15	65049938	0.381863	-0.342589	0.00794678	0	0.0554075
	rs7104764	G	A	11	229977	intronic	SIRT3	WASH7P	1	22084	0.25151	0.377762	0.0197843	2.83229e-81	0.0537288
	rs1354034	T	C	3	56849749	intronic	ARHGEF3	ABLIM3	5	148580575	0.381863	-0.33626	0.0079553	0	0.0533794
	rs1354034	T	C	3	56849749	intronic	ARHGEF3	TSPAN9	12	3291125	0.381863	-0.332201	0.00796069	0	0.0520984
	rs1354034	T	C	3	56849749	intronic	ARHGEF3	JAM3	11	133980358	0.381863	-0.330564	0.00796284	0	0.0515861
	rs13062095	C	T	3	101267385	intergenic	FAM172BP;TRMT10C	ZNF418	19	58440006	0.350092	0.334996	0.00812747	0	0.0510674
	rs1354034	T	C	3	56849749	intronic	ARHGEF3	F13A1	6	6232782	0.381863	-0.325041	0.00797001	0	0.0498768
	rs1354034	T	C	3	56849749	intronic	ARHGEF3	CTTN	11	70263600	0.381863	-0.323258	0.0079723	0	0.0493312
	rs1354034	T	C	3	56849749	intronic	ARHGEF3	TREML1	6	41119577	0.381863	-0.322348	0.00797346	0	0.0490537
	rs1354034	T	C	3	56849749	intronic	ARHGEF3	SLC24A3	20	19448435	0.381863	-0.320959	0.00797523	0	0.0486319
	rs1427407	T	G	2	60718043	intronic	BCL11A	ESPN	1	6503139	0.157026	0.427612	0.0107531	0	0.0484079
	rs1354034	T	C	3	56849749	intronic	ARHGEF3	SELP	1	169578759	0.381863	-0.320136	0.00797627	0	0.048383
	rs1354034	T	C	3	56849749	intronic	ARHGEF3	GP9	3	128780429	0.381863	-0.31887	0.00797787	0	0.0480009
	rs1354034	T	C	3	56849749	intronic	ARHGEF3	TSPAN33	7	128796691	0.381863	-0.31201	0.00798643	0	0.0459578
	rs13062095	C	T	3	101267385	intergenic	FAM172BP;TRMT10C	ZSCAN18	19	58612499	0.350092	0.315711	0.00815189	0	0.0453569
	rs1354034	T	C	3	56849749	intronic	ARHGEF3	HOMER2	15	83582249	0.381863	-0.30407	0.00799609	0	0.0436486
	rs1354034	T	C	3	56849749	intronic	ARHGEF3	C15orf26	15	81370445	0.381863	-0.302787	0.00799763	0	0.0432809
	rs1354034	T	C	3	56849749	intronic	ARHGEF3	45174	22	19707141	0.381863	-0.302149	0.00802554	0	0.0430986
	rs1354034	T	C	3	56849749	intronic	ARHGEF3	ESAM	11	124627106	0.381863	-0.30143	0.0080264	0	0.0428938
	rs2854275	A	C	6	32628428	ncRNA_exonic	HLA-DQB1-AS1	TRBV5-1	7	142020929	0.111806	0.463954	0.0363732	2.90878e-37	0.0427517
	rs1354034	T	C	3	56849749	intronic	ARHGEF3	GP1BA	17	4836958	0.381863	-0.300277	0.00800061	0	0.0425662
	rs13062095	C	T	3	101267385	intergenic	FAM172BP;TRMT10C	ZNF671	19	58235055	0.350092	0.304858	0.00816496	4.0602e-305	0.0422922
	rs149007767	T	C	7	50370254	intronic	IKZF1	RP11-893F2.9	17	48362077	0.149708	-0.403614	0.0294568	9.8902e-43	0.041474
	rs1354034	T	C	3	56849749	intronic	ARHGEF3	LY6G6E	6	31680695	0.381863	-0.294975	0.0135963	2.27733e-104	0.0410764
	rs1354034	T	C	3	56849749	intronic	ARHGEF3	WASF3	13	27197462	0.381863	-0.293699	0.00800832	1.88313e-294	0.0407217
	rs8073060	A	T	17	33875262	exonic	SLFN14	DMTN	8	21923272	0.305723	0.309158	0.00930372	4.03749e-242	0.0405744
	rs477515	A	G	6	32569691	intergenic	HLA-DRB1;HLA-DQA1	TRBV6-5	7	142180765	0.265286	0.320998	0.0225295	4.61965e-46	0.0401667
	rs1354034	T	C	3	56849749	intronic	ARHGEF3	ENSG00000263293	17	45390905	0.381863	-0.291271	0.0213404	2.0523e-42	0.0400512
	rs1354034	T	C	3	56849749	intronic	ARHGEF3	ALOX12	17	6906719	0.381863	-0.290464	0.00801204	8.75206e-288	0.0398298
	rs1354034	T	C	3	56849749	intronic	ARHGEF3	MGLL	3	127474980	0.381863	-0.288695	0.00801406	3.57353e-284	0.0393461
	rs1354034	T	C	3	56849749	intronic	ARHGEF3	LGALSL	2	64684809	0.381863	-0.288372	0.00896769	7.09608e-227	0.0392581
	rs1354034	T	C	3	56849749	intronic	ARHGEF3	VWF	12	6145988	0.381863	-0.287641	0.00806427	1.21324e-278	0.0390593
	rs13198474	A	G	6	25874423	UTR5	SLC17A3	RNF5P1	8	38458448	0.0692555	0.550353	0.0368072	1.50461e-50	0.0390479
	rs477515	A	G	6	32569691	intergenic	HLA-DRB1;HLA-DQA1	TRAV23DV6	14	22554961	0.265286	-0.315327	0.0179914	8.978e-69	0.0387602
	rs9271640	T	C	6	32592200	intergenic	HLA-DRB1;HLA-DQA1	TRBV4-1	7	142013248	0.221621	-0.332696	0.0257359	3.15712e-38	0.038188
	rs1354034	T	C	3	56849749	intronic	ARHGEF3	AQP10	1	154295683	0.381863	-0.283883	0.0080467	1.21558e-272	0.0380452
	rs1354034	T	C	3	56849749	intronic	ARHGEF3	SPARC	5	151053691	0.381863	-0.283165	0.00802028	4.73383e-273	0.0378531
	rs13062095	C	T	3	101267385	intergenic	FAM172BP;TRMT10C	ZNF135	19	58584142	0.350092	0.287449	0.012177	3.35226e-123	0.0375998
	rs9271640	T	C	6	32592200	intergenic	HLA-DRB1;HLA-DQA1	TRAV12-2	14	22356359	0.221621	-0.329984	0.0257442	1.30347e-37	0.037568
	rs1354034	T	C	3	56849749	intronic	ARHGEF3	SEC14L5	16	5038738	0.381863	-0.278497	0.0080802	2.5402e-260	0.0366154
	rs724016	G	A	3	141105570	UTR5	ZBTB38	RP11-439E19.8	1	246964250	0.432429	-0.272288	0.0188889	4.15235e-47	0.0363932
	rs8073060	A	T	17	33875262	exonic	SLFN14	FKBP8	19	18648715	0.305723	0.292464	0.00853199	1.6412e-257	0.0363107
	rs3811444	T	C	1	248039451	exonic	TRIM58	ENSG00000175746	15	39544965	0.337611	0.284897	0.00834575	2.09933e-255	0.0363025
	rs2854275	A	C	6	32628428	ncRNA_exonic	HLA-DQB1-AS1	TRAV17	14	22466092	0.111806	-0.423469	0.0365085	4.15948e-31	0.0356161
	rs11249433	G	A	1	121280613	ncRNA_intronic	EMBP1	RP3-328E19.4	1	148000353	0.397006	0.272412	0.0208002	3.44341e-39	0.0355298
	rs477515	A	G	6	32569691	intergenic	HLA-DRB1;HLA-DQA1	AOAH	7	36658305	0.265286	-0.301862	0.00892901	1.56158e-250	0.0355206
	rs149007767	T	C	7	50370254	intronic	IKZF1	C19orf59	19	7743113	0.149708	-0.372926	0.0123101	1.36683e-201	0.0354069
	rs1354034	T	C	3	56849749	intronic	ARHGEF3	PTGS1	9	125145403	0.381863	-0.272795	0.00803162	7.30113e-253	0.0351313
	rs1354034	T	C	3	56849749	intronic	ARHGEF3	ENSG00000264968	17	38089924	0.381863	-0.271457	0.0209553	2.22733e-38	0.0347876
	rs1354034	T	C	3	56849749	intronic	ARHGEF3	NFIB	9	14240412	0.381863	-0.270331	0.00803424	3.40325e-248	0.0344997
	rs1354034	T	C	3	56849749	intronic	ARHGEF3	MAOB	X	43683775	0.381863	-0.269457	0.0149212	6.75132e-73	0.0342768
	rs149110519	T	C	6	144385777	upstream	PLAGL1	RGL4	22	24035843	0.0526158	0.585292	0.0194024	6.63698e-200	0.0341521
	rs1354034	T	C	3	56849749	intronic	ARHGEF3	VCL	10	75818895	0.381863	-0.26737	0.00803737	1.20239e-242	0.0337481
	rs41294858	C	T	6	135412636	intergenic	HBS1L;MYB	HBG1	11	5270217	0.102935	-0.427067	0.0285463	1.33023e-50	0.0336829
	rs1354034	T	C	3	56849749	intronic	ARHGEF3	AP001189.4	11	76371505	0.381863	-0.265725	0.0192915	3.64397e-43	0.0333341
	rs13062095	C	T	3	101267385	intergenic	FAM172BP;TRMT10C	ZNF571-AS1	19	38059032	0.350092	0.269444	0.0196523	8.77294e-43	0.0330371
	rs1150757	A	G	6	32029205	exonic	TNXB	TRBV5-1	7	142020929	0.102468	0.423362	0.033078	1.6629e-37	0.032968
	rs149110519	T	C	6	144385777	upstream	PLAGL1	TGM3	20	2299185	0.0526158	0.571809	0.019418	1.36327e-190	0.0325968
	rs1354034	T	C	3	56849749	intronic	ARHGEF3	CLEC1B	12	10152132	0.381863	-0.262402	0.00804254	1.70988e-233	0.0325055
	rs1354034	T	C	3	56849749	intronic	ARHGEF3	PTCRA	6	42888650	0.381863	-0.261791	0.00807047	7.97186e-231	0.0323542
	rs6592965	A	G	7	50427982	intronic	IKZF1	PPP2R5B	11	64693486	0.449532	-0.255265	0.00788265	4.74746e-230	0.0322481
	rs1354034	T	C	3	56849749	intronic	ARHGEF3	RAB27B	18	52473919	0.381863	-0.259455	0.00810045	4.20964e-225	0.0317795
	rs8026803	C	T	15	80260014	exonic	BCL2A1	AC104809.4	2	241900451	0.247924	-0.291067	0.0217252	6.23661e-41	0.0315935
	rs9271640	T	C	6	32592200	intergenic	HLA-DRB1;HLA-DQA1	TRAV26-2	14	22670869	0.221621	0.298952	0.0258341	5.71351e-31	0.0308344
	rs3131379	A	G	6	31721033	ncRNA_intronic	MSH5-SAPCD1	TRBV5-1	7	142020929	0.10444	0.404192	0.0328411	8.25405e-35	0.0305609
	rs13062095	C	T	3	101267385	intergenic	FAM172BP;TRMT10C	ZNF211	19	58147954	0.350092	0.258996	0.00821497	3.67142e-218	0.0305246
	rs1354034	T	C	3	56849749	intronic	ARHGEF3	CDC14B	9	99317317	0.381863	-0.253787	0.00807859	1.27057e-216	0.0304062
	rs1354034	T	C	3	56849749	intronic	ARHGEF3	PLXNB3	X	153037226	0.381863	-0.253776	0.0149511	1.2857e-64	0.0304035
	rs6592965	A	G	7	50427982	intronic	IKZF1	MAP2K3	17	21203268	0.449532	0.247695	0.00789032	2.58547e-216	0.0303638
	rs1354034	T	C	3	56849749	intronic	ARHGEF3	LY6G6F	6	31680110	0.381863	-0.252664	0.0120016	2.16473e-98	0.0301377
	rs1354034	T	C	3	56849749	intronic	ARHGEF3	C7orf41	7	30188402	0.381863	-0.251522	0.00878801	3.67106e-180	0.0298659
	rs1354034	T	C	3	56849749	intronic	ARHGEF3	ITGB5	3	124543734	0.381863	-0.248872	0.00806119	2.76954e-209	0.0292397
	rs1354034	T	C	3	56849749	intronic	ARHGEF3	THBS1	15	39882473	0.381863	-0.24856	0.0080564	5.18541e-209	0.0291666
	rs1354034	T	C	3	56849749	intronic	ARHGEF3	C12orf39	12	21684776	0.381863	-0.248521	0.0157702	5.96624e-56	0.0291573
	rs10876550	G	A	12	54712308	intergenic	NFE2;COPZ1	RP11-354E11.2	10	20008368	0.409936	-0.24534	0.0190985	9.05739e-38	0.0291193
	rs1354034	T	C	3	56849749	intronic	ARHGEF3	ILK	11	6628531	0.381863	-0.247951	0.00808434	1.40859e-206	0.0290238
	rs11212617	C	A	11	108283161	intronic	C11orf65	RP11-196G18.22	1	149818328	0.434293	0.242704	0.0189522	1.51563e-37	0.0289439
	rs1354034	T	C	3	56849749	intronic	ARHGEF3	RP3-370M22.8	22	40358544	0.381863	-0.246158	0.0193387	4.09078e-37	0.0286055
	rs660895	G	A	6	32577380	intergenic	HLA-DRB1;HLA-DQA1	TRBV20-1	7	142334538	0.177598	-0.312862	0.0245847	4.24554e-37	0.0285929
	rs149110519	T	C	6	144385777	upstream	PLAGL1	MAPKAPK3	3	50667835	0.0526158	0.534704	0.0194591	3.18159e-166	0.0285036
	rs8073060	A	T	17	33875262	exonic	SLFN14	RNF10	12	120993340	0.305723	0.258912	0.00856668	1.17779e-200	0.0284573
	rs149007767	T	C	7	50370254	intronic	IKZF1	CHI3L1	1	203151968	0.149708	-0.334096	0.0125564	5.54385e-156	0.0284175
	rs1354034	T	C	3	56849749	intronic	ARHGEF3	RP11-498E2.9	9	125134994	0.381863	-0.245194	0.0193409	7.88055e-37	0.0283819
	rs674313	T	C	6	32578082	intergenic	HLA-DRB1;HLA-DQA1	TRBV19	7	142326704	0.2631	-0.266604	0.0241669	2.68438e-28	0.0275609
	rs141094656	C	T	1	92753336	intronic	GLMN	RP11-240E2.2	9	110802683	0.0195137	0.846341	0.0782309	2.81344e-27	0.0274096
	rs1270942	G	A	6	31918860	intronic	CFB	TRBV19	7	142326704	0.103857	-0.383041	0.0329776	3.4498e-31	0.0273108
	rs13062095	C	T	3	101267385	intergenic	FAM172BP;TRMT10C	ZNF667-AS1	19	57000327	0.350092	0.244802	0.0160782	2.38789e-52	0.0272705
	rs2854275	A	C	6	32628428	ncRNA_exonic	HLA-DQB1-AS1	TRBV2	7	142001001	0.111806	0.370494	0.0366663	5.2764e-24	0.0272625
	rs13062095	C	T	3	101267385	intergenic	FAM172BP;TRMT10C	ZNF256	19	58455622	0.350092	0.243746	0.00822974	8.84229e-193	0.0270358
	rs2596500	C	A	6	31321267	downstream	HLA-B	TRBV5-1	7	142020929	0.110278	0.370908	0.0321236	7.70673e-31	0.0269965
	rs1354034	T	C	3	56849749	intronic	ARHGEF3	AC092653.5	2	73928093	0.381863	-0.238814	0.0157883	1.0913e-51	0.0269241
	rs1354034	T	C	3	56849749	intronic	ARHGEF3	ACSBG1	15	78498920	0.381863	-0.238619	0.00809326	4.6585e-191	0.0268803
	rs9271100	T	C	6	32576478	intergenic	HLA-DRB1;HLA-DQA1	TRAV26-1	14	22591759	0.28549	0.256318	0.0235697	1.51822e-27	0.0268034
	rs1354034	T	C	3	56849749	intronic	ARHGEF3	GUCY1A3	4	156620682	0.381863	-0.237743	0.00809408	1.23331e-189	0.0266833
	rs1354034	T	C	3	56849749	intronic	ARHGEF3	GUCY1B3	4	156704443	0.381863	-0.236245	0.00806809	1.78943e-188	0.026348
	rs1354034	T	C	3	56849749	intronic	ARHGEF3	ABCC3	17	48740875	0.381863	-0.236184	0.00806815	2.24251e-188	0.0263345
	rs477515	A	G	6	32569691	intergenic	HLA-DRB1;HLA-DQA1	TRBV5-4	7	142168712	0.265286	-0.258818	0.0226938	3.95686e-30	0.0261128
	rs9399137	C	T	6	135419018	intergenic	HBS1L;MYB	TMEM158	3	45266864	0.264393	0.258892	0.00890575	8.54955e-186	0.0260713
	rs78744187	T	C	19	33754548	intergenic	SLC7A10;CEBPA	TPSB2	16	1278743	0.0806295	0.418991	0.0319913	3.42531e-39	0.0260269
	rs1150757	A	G	6	32029205	exonic	TNXB	TRAV12-2	14	22356359	0.102468	0.374948	0.0264467	1.26265e-45	0.0258589
	rs6600233	T	C	16	143503	intronic	NPRL3	TUBB8P7	16	90161162	0.435703	-0.228143	0.0189778	2.73621e-33	0.0255943
	rs9274623	T	G	6	32635998	intergenic	HLA-DQB1;HLA-DQA2	TRAV8-1	14	22265758	0.188698	0.288806	0.0300649	7.5349e-22	0.0255384
	rs11686934	G	A	2	70172116	intergenic	MXD1;ASPRV1	KCNH3	12	49942515	0.445453	0.227026	0.00793856	7.13513e-180	0.0254637
	rs10761741	T	G	10	65066186	intronic	JMJD1C	AQP10	1	154295683	0.420816	0.228301	0.00797065	1.97641e-180	0.0254071
	rs4761234	C	T	12	69732105	intergenic	CPSF6;LYZ	ITPK1-AS1	14	93536147	0.459799	0.225274	0.00960698	1.35333e-121	0.0252102
	rs615672	C	G	6	32574171	intergenic	HLA-DRB1;HLA-DQA1	TRAV8-1	14	22265758	0.373068	0.23215	0.0222509	1.74713e-25	0.0252102
	rs10512472	C	T	17	33884804	exonic	SLFN14	ITGA2B	17	42458210	0.179037	0.292194	0.0102656	3.32655e-178	0.0250979
	rs9267488	G	A	6	31514247	ncRNA_intronic	ATP6V1G2-DDX39B	TRBV19	7	142326704	0.10306	-0.368279	0.0331282	1.03933e-28	0.0250748
	rs615672	C	G	6	32574171	intergenic	HLA-DRB1;HLA-DQA1	TRBV20-1	7	142334538	0.373068	0.22955	0.0222573	6.12299e-25	0.0246487
	rs243070	A	T	2	60620286	intergenic	MIR4432HG;BCL11A	HBG1	11	5270217	0.282207	-0.24567	0.0193653	7.06154e-37	0.0244513
	rs11249433	G	A	1	121280613	ncRNA_intronic	EMBP1	RP11-782C8.1	1	143176239	0.397006	0.225634	0.0192447	9.5463e-32	0.0243753
	rs13062095	C	T	3	101267385	intergenic	FAM172BP;TRMT10C	ZNF274	19	58709662	0.350092	0.231301	0.00826918	3.61098e-172	0.0243456
	rs7210990	A	C	17	16170764	intronic	PIGL	TBL1XR1	3	176826202	0.481977	0.220399	0.0117047	4.28761e-79	0.0242564
	rs6600233	T	C	16	143503	intronic	NPRL3	ENSG00000173876	10	106465	0.435703	-0.221068	0.0178488	3.12737e-35	0.0240316
	rs149110519	T	C	6	144385777	upstream	PLAGL1	P2RX1	17	3809840	0.0526158	0.490541	0.0195042	1.39551e-139	0.0239896
	rs1354034	T	C	3	56849749	intronic	ARHGEF3	FSTL1	3	120140620	0.381863	-0.224755	0.00893558	1.31695e-139	0.0238474
	rs3131379	A	G	6	31721033	ncRNA_intronic	MSH5-SAPCD1	TRAV12-2	14	22356359	0.10444	0.356312	0.026253	5.85383e-42	0.0237493
	rs149110519	T	C	6	144385777	upstream	PLAGL1	IDI1	10	1090479	0.0526158	0.484763	0.0195099	2.77941e-136	0.0234278
	rs149110519	T	C	6	144385777	upstream	PLAGL1	FLOT1	6	30702998	0.0526158	-0.483113	0.0421635	2.14161e-30	0.0232686
	rs1354034	T	C	3	56849749	intronic	ARHGEF3	ENDOD1	11	94844391	0.381863	-0.221851	0.00813612	1.03355e-163	0.0232351
	rs1150753	G	A	6	32059867	intronic	TNXB	TRAV8-1	14	22265758	0.103682	0.353555	0.0330713	1.12519e-26	0.0232332
	rs1354034	T	C	3	56849749	intronic	ARHGEF3	PEAR1	1	156874858	0.381863	-0.221814	0.0088537	1.61115e-138	0.0232273
	rs1354034	T	C	3	56849749	intronic	ARHGEF3	RP11-501J20.5	10	119000272	0.381863	-0.221779	0.0193922	2.74747e-30	0.02322
	rs1354034	T	C	3	56849749	intronic	ARHGEF3	RP11-439E19.8	1	246964250	0.381863	0.22151	0.0193928	3.23556e-30	0.0231637
	rs10512472	C	T	17	33884804	exonic	SLFN14	CTDSPL	3	37964705	0.179037	0.28023	0.0102414	7.68893e-165	0.0230848
	rs225245	G	A	17	33946107	intronic	AP2B1	UBXN6	19	4451407	0.440335	-0.215621	0.00795137	6.12302e-162	0.0229153
	rs13289095	T	G	9	131466489	intronic	PKN3	DEFA4	8	6794602	0.119513	0.329675	0.026892	1.49973e-34	0.0228739
	rs3774937	C	T	4	103434253	intronic	NFKB1	COL9A2	1	40774823	0.320593	0.228185	0.00843006	2.34523e-161	0.0226823
	rs1354034	T	C	3	56849749	intronic	ARHGEF3	PRKAR2B	7	106743675	0.381863	-0.216714	0.00808538	2.9653e-158	0.0221715
	rs1150753	G	A	6	32059867	intronic	TNXB	TRBV2	7	142001001	0.103682	0.344677	0.0330908	2.09363e-25	0.0220811
	rs149110519	T	C	6	144385777	upstream	PLAGL1	CHST7	X	46445531	0.0526158	0.469765	0.0421908	8.54134e-29	0.0220006
	rs826415	G	T	1	118153977	intronic	TENT5C	PF4V1	4	74719389	0.308498	0.226458	0.00852173	1.34918e-155	0.0218802
	rs1354034	T	C	3	56849749	intronic	ARHGEF3	LIMS1	2	109227279	0.381863	-0.215195	0.0081141	5.53542e-155	0.0218618
	rs4713555	T	G	6	32575524	intergenic	HLA-DRB1;HLA-DQA1	TRAV38-2DV8	14	22749309	0.265418	-0.236148	0.0213533	1.98075e-28	0.0217456
	rs6600233	T	C	16	143503	intronic	NPRL3	RP11-683L23.1	18	60385	0.435703	-0.21012	0.0190156	2.19459e-28	0.0217102
	rs28798705	G	A	6	32617809	intergenic	HLA-DQA1;HLA-DQB1	AOAH	7	36658305	0.344011	0.219273	0.011097	6.6197e-87	0.0217005
	rs3184504	C	T	12	111884608	exonic	SH2B3	GBP5	1	89731588	0.542056	-0.208505	0.0130932	4.27057e-57	0.0215834
	rs9378249	G	T	6	31327701	intergenic	HLA-B;MICA-AS1	TRBV19	7	142326704	0.0795323	0.382805	0.0372952	1.02164e-24	0.0214554
	rs1354034	T	C	3	56849749	intronic	ARHGEF3	ENSG00000223622	6	52674334	0.381863	-0.213119	0.0218568	1.83201e-22	0.0214422
	rs1354034	T	C	3	56849749	intronic	ARHGEF3	PDLIM1	10	97024055	0.381863	-0.212146	0.0080892	1.34996e-151	0.0212467
	rs1354034	T	C	3	56849749	intronic	ARHGEF3	RP11-672A2.4	11	76366484	0.381863	-0.211961	0.0200374	3.75713e-26	0.0212097
	rs782590	C	T	2	55843413	intronic	PPP4R3B	MTATP6P1	1	569416	0.493968	-0.205672	0.0188645	1.1201e-27	0.0211474
	rs13289095	T	G	9	131466489	intronic	PKN3	DEFA3	8	6874607	0.119513	0.316124	0.029079	1.58107e-27	0.0210321
	rs56330463	T	C	5	148200011	intergenic	HTR4;ADRB2	RP11-405F3.4	16	57725339	0.417903	0.207781	0.0200732	4.13273e-25	0.0210046
	rs10512472	C	T	17	33884804	exonic	SLFN14	ITGB3	17	45376435	0.179037	0.265835	0.0152823	9.00267e-68	0.020774
	rs1354034	T	C	3	56849749	intronic	ARHGEF3	PF4	4	74847317	0.381863	-0.209603	0.00882924	1.40712e-124	0.0207404
	rs1354034	T	C	3	56849749	intronic	ARHGEF3	ANO6	12	45721978	0.381863	-0.209163	0.00882963	4.70375e-124	0.0206535
	rs9271640	T	C	6	32592200	intergenic	HLA-DRB1;HLA-DQA1	TRBV25-1	7	142378824	0.221621	0.243885	0.0259712	5.96594e-21	0.0205212
	rs1532331	G	T	5	43116830	intergenic	LOC100506639;ZNF131	FAHD2CP	2	96682713	0.316115	-0.217602	0.0202917	7.87871e-27	0.0204732
	rs7104764	G	A	11	229977	intronic	SIRT3	WASH2P	2	114349159	0.25151	0.232914	0.0201294	5.79399e-31	0.020425
	rs6592965	A	G	7	50427982	intronic	IKZF1	VWCE	11	61044329	0.449532	0.203055	0.00790391	1.49645e-145	0.0204055
	rs724016	G	A	3	141105570	UTR5	ZBTB38	RP11-455F5.3	16	30111594	0.432429	-0.203002	0.0190467	1.59829e-26	0.0202285
	rs111778408	A	G	14	35572163	ncRNA_intronic	LOC101927178	GHRL	3	10330995	0.100785	-0.333925	0.0194678	5.99988e-66	0.0202109
	rs145269503	A	G	6	31705126	upstream	CLIC1	TRAV23DV6	14	22554961	0.0298663	-0.589024	0.0681394	5.40888e-18	0.0201052
	rs9274623	T	G	6	32635998	intergenic	HLA-DQB1;HLA-DQA2	TRAV13-1	14	22337283	0.188698	-0.255468	0.0301505	2.38947e-17	0.0199826
	rs1354034	T	C	3	56849749	intronic	ARHGEF3	TUBA1C	12	49624816	0.381863	-0.205512	0.00991421	1.89691e-95	0.0199386
	rs1354034	T	C	3	56849749	intronic	ARHGEF3	45173	17	56607895	0.381863	-0.205062	0.00809496	1.41903e-141	0.0198514
	rs3131379	A	G	6	31721033	ncRNA_intronic	MSH5-SAPCD1	TRAV8-1	14	22265758	0.10444	0.324823	0.0330239	7.8781e-23	0.0197372
	rs2596500	C	A	6	31321267	downstream	HLA-B	TRAV12-2	14	22356359	0.110278	0.317125	0.025685	5.07508e-35	0.0197349
	rs1354034	T	C	3	56849749	intronic	ARHGEF3	RAB6B	3	133578881	0.381863	-0.204106	0.00819314	5.54297e-137	0.0196668
	rs243070	A	T	2	60620286	intergenic	MIR4432HG;BCL11A	ESPN	1	6503139	0.282207	-0.220085	0.00878506	1.65209e-138	0.0196236
	rs11249433	G	A	1	121280613	ncRNA_intronic	EMBP1	ENSG00000232274	1	143164887	0.397006	0.202156	0.0209716	5.44526e-22	0.0195665
	rs6927022	G	A	6	32612397	downstream	HLA-DQA1	TRAV29DV5	14	22631450	0.418859	0.200392	0.0222666	2.26335e-19	0.0195498
	rs1354034	T	C	3	56849749	intronic	ARHGEF3	PLOD2	3	145834333	0.381863	-0.203481	0.00809622	2.17922e-139	0.0195465
	rs3131379	A	G	6	31721033	ncRNA_intronic	MSH5-SAPCD1	TRBV2	7	142001001	0.10444	0.322758	0.0330281	1.48198e-22	0.019487
	rs10512472	C	T	17	33884804	exonic	SLFN14	C7orf41	7	30188402	0.179037	0.257363	0.0111961	6.31782e-117	0.019471
	rs592423	A	C	6	139840693	intergenic	LINC01625;FILNC1	IGF2BP2	3	185452185	0.467953	-0.197692	0.0117499	1.60332e-63	0.0194607
	rs9267488	G	A	6	31514247	ncRNA_intronic	ATP6V1G2-DDX39B	TRAV17	14	22466092	0.10306	-0.322843	0.0264684	3.21302e-34	0.0192693
	rs11212617	C	A	11	108283161	intronic	C11orf65	HIST1H1C	6	26056333	0.434293	0.197769	0.00798568	2.11092e-135	0.0192186
	rs11212617	C	A	11	108283161	intronic	C11orf65	HIST1H2BD	6	26164963	0.434293	0.197487	0.0079859	5.15252e-135	0.0191639
	rs149007767	T	C	7	50370254	intronic	IKZF1	OR52K3P	11	4496583	0.149708	-0.274248	0.0297979	3.46154e-20	0.0191483
	rs149110519	T	C	6	144385777	upstream	PLAGL1	CKAP4	12	106664856	0.0526158	0.43819	0.0195526	3.08839e-111	0.0191424
	rs1354034	T	C	3	56849749	intronic	ARHGEF3	LTBP1	2	33398307	0.381863	-0.201332	0.00809792	1.90852e-136	0.0191359
	rs149007767	T	C	7	50370254	intronic	IKZF1	CD14	5	140012299	0.149708	-0.274019	0.011318	1.70804e-129	0.0191163
	rs10822184	C	T	10	65337153	intronic	REEP3	AQP10	1	154295683	0.511758	0.194751	0.00791273	9.32841e-134	0.0189534
	rs1354034	T	C	3	56849749	intronic	ARHGEF3	VIL1	2	219300916	0.381863	-0.200257	0.0120707	8.19102e-62	0.018932
	rs674313	T	C	6	32578082	intergenic	HLA-DRB1;HLA-DQA1	TRBV30	7	142510677	0.2631	-0.220839	0.0242741	9.22649e-20	0.0189108
	rs660895	G	A	6	32577380	intergenic	HLA-DRB1;HLA-DQA1	DEF8	16	90024400	0.177598	-0.253771	0.0103592	1.58609e-132	0.0188121
	rs10512472	C	T	17	33884804	exonic	SLFN14	TSPAN9	12	3291125	0.179037	0.252809	0.0102639	5.91101e-134	0.018788
	rs13062095	C	T	3	101267385	intergenic	FAM172BP;TRMT10C	ZIK1	19	58097484	0.350092	0.202582	0.00902195	1.16172e-111	0.0186752
	rs10512472	C	T	17	33884804	exonic	SLFN14	MYL9	20	35174057	0.179037	0.251966	0.0102646	4.64467e-133	0.0186629
	rs1150753	G	A	6	32059867	intronic	TNXB	TRAV17	14	22466092	0.103682	-0.316162	0.0264073	4.95139e-33	0.0185787
	rs11212617	C	A	11	108283161	intronic	C11orf65	HIST1H3D	6	26198294	0.434293	0.193394	0.0118349	5.04191e-60	0.0183777
	rs149110519	T	C	6	144385777	upstream	PLAGL1	ENSG00000228315	22	24020108	0.0526158	0.429303	0.0481103	4.52597e-19	0.0183738
	rs3819306	G	A	6	31322133	intronic	HLA-B	XRCC6	22	42038583	0.449438	0.192603	0.00969278	7.28329e-88	0.0183584
	rs1354034	T	C	3	56849749	intronic	ARHGEF3	SLC6A4	17	28542178	0.381863	-0.195624	0.00810233	8.59118e-129	0.0180662
	rs149110519	T	C	6	144385777	upstream	PLAGL1	CTC-503J8.6	19	6211441	0.0526158	-0.425496	0.0463135	4.02825e-20	0.0180494
	rs149110519	T	C	6	144385777	upstream	PLAGL1	TTC9	14	71125290	0.0526158	0.425459	0.0254458	9.34052e-63	0.0180463
	rs149007767	T	C	7	50370254	intronic	IKZF1	CFP	X	47486658	0.149708	-0.266225	0.0219231	6.20353e-34	0.0180444
	rs28383314	T	C	6	32587213	intergenic	HLA-DRB1;HLA-DQA1	TRAV35	14	22690081	0.383654	0.195301	0.0219897	6.59647e-19	0.0180387
	rs1354034	T	C	3	56849749	intronic	ARHGEF3	PDE5A	4	120482848	0.381863	-0.195072	0.00884175	7.23052e-108	0.0179644
	rs56388170	T	G	7	28724374	intronic	CREB5	SRPK1	6	35844931	0.289189	-0.208986	0.00872829	1.07993e-126	0.0179556
	rs1354034	T	C	3	56849749	intronic	ARHGEF3	EGF	4	110883731	0.381863	-0.19488	0.0081029	8.22797e-128	0.0179289
	rs1354034	T	C	3	56849749	intronic	ARHGEF3	WRB	21	40776312	0.381863	-0.194797	0.00810808	1.5204e-127	0.0179138
	rs8073060	A	T	17	33875262	exonic	SLFN14	BAG6	6	31613643	0.305723	0.204953	0.0158685	3.6709e-38	0.017832
	rs149110519	T	C	6	144385777	upstream	PLAGL1	GPX3	5	150404339	0.0526158	0.422783	0.0195658	1.50073e-103	0.01782
	rs1354034	T	C	3	56849749	intronic	ARHGEF3	TGFB1I1	16	31486093	0.381863	-0.193895	0.00813115	1.11418e-125	0.0177483
	rs13062095	C	T	3	101267385	intergenic	FAM172BP;TRMT10C	ZNF419	19	58002563	0.350092	0.197021	0.00826928	1.81344e-125	0.0176639
	rs1354034	T	C	3	56849749	intronic	ARHGEF3	EHD3	2	31474596	0.381863	-0.192882	0.00810441	3.37177e-125	0.0175632
	rs149007767	T	C	7	50370254	intronic	IKZF1	MICAL2	11	12200438	0.149708	-0.262637	0.0171631	7.36884e-53	0.0175612
	rs2596500	C	A	6	31321267	downstream	HLA-B	TRBV2	7	142001001	0.110278	0.298911	0.0322794	2.04241e-20	0.017533
	rs149007767	T	C	7	50370254	intronic	IKZF1	CD93	20	23063481	0.149708	-0.262129	0.0113274	1.78284e-118	0.0174933
	rs9271117	C	T	6	32576795	intergenic	HLA-DRB1;HLA-DQA1	TRBV2	7	142001001	0.297504	-0.204385	0.0284556	6.8398e-13	0.0174609
	rs2596500	C	A	6	31321267	downstream	HLA-B	TRAV8-1	14	22265758	0.110278	0.298197	0.0322808	2.52088e-20	0.0174494
	rs35033748	C	T	17	27179590	intergenic	FAM222B;ERAL1	FAXDC2	5	154218431	0.215702	0.225832	0.0114257	5.92451e-87	0.0172559
	rs10512472	C	T	17	33884804	exonic	SLFN14	PGRMC1	X	118374322	0.179037	0.241856	0.0190755	7.74106e-37	0.0171953
	rs1354034	T	C	3	56849749	intronic	ARHGEF3	CD9	12	6328153	0.381863	-0.190397	0.00813377	3.52608e-121	0.0171136
	rs1354034	T	C	3	56849749	intronic	ARHGEF3	FERMT3	11	63982752	0.381863	-0.190079	0.00813401	8.95971e-121	0.0170565
	rs2854275	A	C	6	32628428	ncRNA_exonic	HLA-DQB1-AS1	TRAV26-1	14	22591759	0.111806	-0.292486	0.0368594	2.10156e-15	0.0169908
	rs28475163	A	G	11	327143	intergenic	IFITM3;B4GALNT4	TXNDC12	1	52503823	0.221011	-0.221891	0.0126425	5.83391e-69	0.0169532
	rs1354034	T	C	3	56849749	intronic	ARHGEF3	NEXN	1	78381889	0.381863	-0.189055	0.00810725	2.82478e-120	0.0168733
	rs1354034	T	C	3	56849749	intronic	ARHGEF3	SDPR	2	192705504	0.381863	-0.188993	0.0081073	3.38931e-120	0.0168622
	rs149110519	T	C	6	144385777	upstream	PLAGL1	OGDH	7	44697418	0.0526158	0.41105	0.0195755	6.81178e-98	0.0168447
	rs149110519	T	C	6	144385777	upstream	PLAGL1	G6PD	X	153767696	0.0526158	0.410694	0.0423025	2.77389e-22	0.0168155
	rs1354034	T	C	3	56849749	intronic	ARHGEF3	AL022344.7	10	43247109	0.381863	-0.188427	0.0194562	3.50235e-22	0.0167614
	rs1150753	G	A	6	32059867	intronic	TNXB	TRAV12-1	14	22309689	0.103682	0.300031	0.0331812	1.5355e-19	0.0167312
	rs652888	G	A	6	31851234	intronic	EHMT2	TRAV26-1	14	22591759	0.206206	-0.226007	0.0250018	1.57246e-19	0.0167217
	rs6763931	A	G	3	141102833	intronic	ZBTB38	NFE4	7	102621636	0.434026	-0.184357	0.0190727	4.20493e-22	0.0166978
	rs342293	G	C	7	106372219	intergenic	CCDC71L;PIK3CG	AC114752.3	2	64566991	0.450728	0.183601	0.0189985	4.28787e-22	0.016691
	rs10512472	C	T	17	33884804	exonic	SLFN14	PTGS1	9	125145403	0.179037	0.238111	0.010275	8.36834e-119	0.0166669
	rs13062095	C	T	3	101267385	intergenic	FAM172BP;TRMT10C	HKR1	19	37832003	0.350092	0.190939	0.0082738	7.79139e-118	0.0165902
	rs7210990	A	C	17	16170764	intronic	PIGL	IL8	4	74607828	0.481977	0.182181	0.00878283	1.42095e-95	0.0165735
	rs4822024	A	G	22	41757647	intergenic	ZC3H7B;TEF	LONRF3	X	118132734	0.224124	0.218088	0.0175433	1.76516e-35	0.0165415
	rs7606173	C	G	2	60725451	intronic	BCL11A	CTSE	1	206324781	0.393094	-0.18603	0.0149779	2.028e-35	0.0165125
	rs3816804	T	C	12	56680745	intronic	CS	MAFG-AS1	17	79887167	0.0908489	0.315189	0.0214859	1.00938e-48	0.0164107
	rs9274623	T	G	6	32635998	intergenic	HLA-DQB1;HLA-DQA2	TRAV12-1	14	22309689	0.188698	0.231512	0.0302054	1.79389e-14	0.0164107
	rs10512472	C	T	17	33884804	exonic	SLFN14	DMTN	8	21923272	0.179037	0.236147	0.0112137	1.89925e-98	0.0163931
	rs9271640	T	C	6	32592200	intergenic	HLA-DRB1;HLA-DQA1	TRAV17	14	22466092	0.221621	0.217519	0.0260268	6.40613e-17	0.016324
	rs11212617	C	A	11	108283161	intronic	C11orf65	HIST1H1PS1	6	26195896	0.434293	0.182196	0.0200218	9.0415e-20	0.0163111
	rs9274623	T	G	6	32635998	intergenic	HLA-DQB1;HLA-DQA2	TRAV21	14	22521044	0.188698	0.230304	0.013297	3.32358e-67	0.0162399
	rs149110519	T	C	6	144385777	upstream	PLAGL1	HM13	20	30129800	0.0526158	0.403348	0.0195817	2.84835e-94	0.0162193
	rs1354034	T	C	3	56849749	intronic	ARHGEF3	ODC1	2	10584362	0.381863	-0.185298	0.00810999	1.52636e-115	0.0162092
	rs56388170	T	G	7	28724374	intronic	CREB5	ST20	15	80203613	0.289189	0.198202	0.0161388	1.14432e-34	0.0161504
	rs10876550	G	A	12	54712308	intergenic	NFE2;COPZ1	SPOCD1	1	32268837	0.409936	-0.182076	0.0080121	2.53053e-114	0.016038
	rs1354034	T	C	3	56849749	intronic	ARHGEF3	TUBB1	20	57598009	0.381863	-0.18429	0.00814342	2.17128e-113	0.0160334
	rs149007767	T	C	7	50370254	intronic	IKZF1	PI3	20	43804351	0.149708	-0.249875	0.0113366	1.15255e-107	0.015896
	rs4917014	G	T	7	50305863	intergenic	SPATA48;IKZF1	CLEC10A	17	6980741	0.316454	0.191647	0.00855432	3.63026e-111	0.0158897
	rs9271640	T	C	6	32592200	intergenic	HLA-DRB1;HLA-DQA1	ZNF672	1	249138062	0.221621	-0.214408	0.0103388	1.5668e-95	0.0158604
	rs13198474	A	G	6	25874423	UTR5	SLC17A3	HLA-S	6	31349958	0.0692555	-0.348573	0.0410549	2.05927e-17	0.015664
	rs1354034	T	C	3	56849749	intronic	ARHGEF3	PCSK6	15	101953111	0.381863	-0.181561	0.00816801	1.82932e-109	0.0155621
	rs592423	A	C	6	139840693	intergenic	LINC01625;FILNC1	PLEK2	14	67866308	0.467953	-0.176681	0.00791365	2.06152e-110	0.0155439
	rs28453840	G	A	2	136522941	intronic	UBXN4	ENSG00000259162	14	20907784	0.31882	-0.189122	0.0211248	3.47206e-19	0.0155353
	rs1354034	T	C	3	56849749	intronic	ARHGEF3	RP11-588K22.2	4	156656907	0.381863	-0.181093	0.0158809	4.03027e-30	0.0154819
	rs6592965	A	G	7	50427982	intronic	IKZF1	TMEM86B	19	55739827	0.449532	0.176845	0.0118099	1.081e-50	0.0154777
	rs9420589	T	G	10	94450233	intronic	HHEX	CCL3	17	34416558	0.428682	0.177219	0.01486	8.67415e-33	0.0153838
	rs17655730	C	T	11	270715	intergenic	PSMD13;NLRP6	DDX11L1	1	13140	0.234959	0.206453	0.023419	1.19046e-18	0.0153232
	rs141094656	C	T	1	92753336	intronic	GLMN	LINC00482	17	79280309	0.0195137	0.631825	0.0787174	1.00293e-15	0.0152758
	rs10512472	C	T	17	33884804	exonic	SLFN14	SPARC	5	151053691	0.179037	0.227936	0.0102823	7.02616e-109	0.0152729
	rs8026803	C	T	15	80260014	exonic	BCL2A1	CTD-3064M3.3	8	142364484	0.247924	-0.202114	0.0219079	2.81978e-20	0.0152336
	rs56330463	T	C	5	148200011	intergenic	HTR4;ADRB2	TLR2	4	154624751	0.417903	-0.176287	0.0119134	1.52255e-49	0.0151197
	rs1354034	T	C	3	56849749	intronic	ARHGEF3	HRASLS	3	192977220	0.381863	-0.178721	0.0150688	1.90292e-32	0.015079
	rs1354034	T	C	3	56849749	intronic	ARHGEF3	TRBV7-4	7	142176559	0.381863	-0.178449	0.0194733	5.01013e-20	0.0150332
	rs1354034	T	C	3	56849749	intronic	ARHGEF3	RUFY1	5	179007293	0.381863	-0.178279	0.00812008	7.7071e-107	0.0150045
	rs10512472	C	T	17	33884804	exonic	SLFN14	RP11-501J20.5	10	119000272	0.179037	0.225418	0.0246788	6.59531e-20	0.0149374
	rs1354034	T	C	3	56849749	intronic	ARHGEF3	RP11-874J12.4	18	3654846	0.381863	0.17769	0.0194746	7.2268e-20	0.0149055
	rs14408	C	T	11	308314	exonic	IFITM2	TXNDC12	1	52503823	0.393659	-0.176384	0.0139084	7.45037e-37	0.0148521
	rs1150757	A	G	6	32029205	exonic	TNXB	TRBV20-1	7	142334538	0.102468	0.284152	0.0333864	1.7244e-17	0.0148515
	rs7785014	T	C	7	137881690	intergenic	MIR4468;TRIM24	CES1	16	55852006	0.331668	-0.182125	0.0186045	1.25159e-22	0.0147051
	rs149110519	T	C	6	144385777	upstream	PLAGL1	CA4	17	58237778	0.0526158	0.383942	0.0195969	1.80941e-85	0.0146961
	rs1354034	T	C	3	56849749	intronic	ARHGEF3	ARHGAP6	X	11410030	0.381863	-0.176152	0.0150721	1.48018e-31	0.0146487
	rs7104764	G	A	11	229977	intronic	SIRT3	WASH3P	15	102509062	0.25151	0.196987	0.0201891	1.72003e-22	0.0146099
	rs6592965	A	G	7	50427982	intronic	IKZF1	CTSE	1	206324781	0.449532	-0.171723	0.0147209	1.91951e-31	0.0145941
	rs8073060	A	T	17	33875262	exonic	SLFN14	RP11-175B9.2	1	202408304	0.305723	0.185261	0.018074	1.18221e-24	0.0145699
	rs1354034	T	C	3	56849749	intronic	ARHGEF3	ABCC4	13	95812885	0.381863	-0.175544	0.0081717	2.29908e-102	0.0145476
	rs1354034	T	C	3	56849749	intronic	ARHGEF3	C1orf198	1	230989100	0.381863	-0.175288	0.00811701	1.99711e-103	0.0145052
	rs149110519	T	C	6	144385777	upstream	PLAGL1	BIN2	12	51696637	0.0526158	0.381211	0.0305583	1.02335e-35	0.0144879
	rs6927022	G	A	6	32612397	downstream	HLA-DQA1	TRBV25-1	7	142378824	0.418859	-0.171789	0.0223253	1.41716e-14	0.0143671
	rs11212617	C	A	11	108283161	intronic	C11orf65	H1F0	22	38202278	0.434293	-0.170654	0.00803314	3.76994e-100	0.0143099
	rs1354034	T	C	3	56849749	intronic	ARHGEF3	ENSG00000225981	7	1501608	0.381863	-0.174024	0.0219365	2.13742e-15	0.0142969
	rs13062095	C	T	3	101267385	intergenic	FAM172BP;TRMT10C	ZNF702P	19	53506327	0.350092	0.177109	0.00867231	1.0574e-92	0.014274
	rs73396800	C	G	6	32914726	intergenic	HLA-DMB;HLA-DMA	TRBV5-1	7	142020929	0.0724388	0.325722	0.0390718	7.65218e-17	0.0142573
	rs149007767	T	C	7	50370254	intronic	IKZF1	CYP4F3	19	15762670	0.149708	-0.235535	0.0113655	2.1177e-95	0.0141239
	rs9271100	T	C	6	32576478	intergenic	HLA-DRB1;HLA-DQA1	TRBV29-1	7	142448397	0.28549	0.186006	0.0237229	4.47685e-15	0.0141151
	rs3021304	C	G	6	32575658	intergenic	HLA-DRB1;HLA-DQA1	TRBV4-1	7	142013248	0.502148	0.167845	0.0214293	4.78263e-15	0.0140857
	rs1354034	T	C	3	56849749	intronic	ARHGEF3	PKHD1L1	8	110458632	0.381863	-0.1723	0.00811903	6.02074e-100	0.0140149
	rs56388170	T	G	7	28724374	intronic	CREB5	BMX	X	15528510	0.289189	-0.184424	0.0161566	3.52714e-30	0.013983
	rs660895	G	A	6	32577380	intergenic	HLA-DRB1;HLA-DQA1	TRBV5-6	7	142131665	0.177598	-0.218603	0.0247691	1.08875e-18	0.0139593
	rs9274623	T	G	6	32635998	intergenic	HLA-DQB1;HLA-DQA2	TRAV35	14	22690081	0.188698	0.21336	0.0302433	1.72849e-12	0.0139382
	rs7075195	G	A	10	65050659	intronic	JMJD1C	CXCL5	4	74862927	0.421253	0.16907	0.00803097	2.18308e-98	0.0139377
	rs225245	G	A	17	33946107	intronic	AP2B1	SLC38A5	X	48322782	0.440335	-0.168074	0.0147562	4.68452e-30	0.0139234
	rs1354034	T	C	3	56849749	intronic	ARHGEF3	GRAP2	22	40333405	0.381863	-0.17139	0.00811964	6.7013e-99	0.0138674
	rs3131379	A	G	6	31721033	ncRNA_intronic	MSH5-SAPCD1	TRAV12-1	14	22309689	0.10444	0.270347	0.0331259	3.31712e-16	0.0136721
	rs225245	G	A	17	33946107	intronic	AP2B1	VWCE	11	61044329	0.440335	-0.166147	0.00798916	4.65568e-96	0.0136058
	rs10187424	C	T	2	85794297	intergenic	GGCX;VAMP8	DPEP3	16	68012149	0.420816	-0.166961	0.00799171	6.35775e-97	0.0135884
	rs3131379	A	G	6	31721033	ncRNA_intronic	MSH5-SAPCD1	TRBV20-1	7	142334538	0.10444	0.269116	0.033128	4.52929e-16	0.0135478
	rs2596500	C	A	6	31321267	downstream	HLA-B	TRAV12-1	14	22309689	0.110278	0.262491	0.0323453	4.84586e-16	0.0135208
	rs10512472	C	T	17	33884804	exonic	SLFN14	PEAR1	1	156874858	0.179037	0.214329	0.0112756	1.45595e-80	0.0135039
	rs3184504	C	T	12	111884608	exonic	SH2B3	FCGR1A	1	149759150	0.542056	-0.164924	0.0175915	6.90447e-21	0.0135037
	rs149007767	T	C	7	50370254	intronic	IKZF1	RP11-439A17.9	1	120929317	0.149708	-0.229967	0.0318038	4.80157e-13	0.013464
	rs590856	G	A	6	139844429	intergenic	LINC01625;FILNC1	KRT1	12	53071355	0.465502	-0.16445	0.00865038	1.39084e-80	0.0134575
	rs2233956	C	T	6	31081205	upstream	C6orf15	TRAV17	14	22466092	0.157552	-0.22503	0.0221543	3.07158e-24	0.0134424
	rs1354034	T	C	3	56849749	intronic	ARHGEF3	CXCL5	4	74862927	0.381863	-0.168737	0.00814895	3.02037e-95	0.0134414
	rs3132565	G	A	6	31102964	intronic	PSORS1C1	TRBV25-1	7	142378824	0.482941	-0.163581	0.0202768	7.1811e-16	0.0133638
	rs9420589	T	G	10	94450233	intronic	HHEX	CD160	1	145705706	0.428682	0.164761	0.0119197	1.8622e-43	0.0132969
	rs1354034	T	C	3	56849749	intronic	ARHGEF3	CDK2AP1	12	123751204	0.381863	-0.167777	0.0088961	2.45067e-79	0.0132888
	rs149007767	T	C	7	50370254	intronic	IKZF1	AIF1	6	31583879	0.149708	-0.227704	0.0172011	5.31517e-40	0.0132003
	rs10512472	C	T	17	33884804	exonic	SLFN14	NRGN	11	124613849	0.179037	0.211754	0.0102932	4.87057e-94	0.0131813
	rs149110519	T	C	6	144385777	upstream	PLAGL1	RP11-869B15.1	11	64552742	0.0526158	0.363332	0.0464287	5.05241e-15	0.0131607
	rs12153855	C	T	6	32074804	intronic	TNXB	TRBV6-5	7	142180765	0.104023	0.265436	0.0331936	1.27902e-15	0.0131334
	rs429150	T	C	6	32075563	intronic	TNXB	TRAV35	14	22690081	0.478581	0.162123	0.0202862	1.32983e-15	0.0131178
	rs9274623	T	G	6	32635998	intergenic	HLA-DQB1;HLA-DQA2	TRAV38-1	14	22740148	0.188698	-0.206766	0.0302563	8.26943e-12	0.0130899
	rs73396800	C	G	6	32914726	intergenic	HLA-DMB;HLA-DMA	TRAV12-2	14	22356359	0.0724388	0.311682	0.0311436	1.40708e-23	0.0130547
	rs1354034	T	C	3	56849749	intronic	ARHGEF3	CLU	8	27463491	0.381863	-0.16569	0.00817305	2.24022e-91	0.0129603
	rs7189020	T	A	16	304803	intronic	FAM234A	TUBB8P7	16	90161162	0.37968	0.165676	0.0195156	2.07707e-17	0.0129295
	rs73396800	C	G	6	32914726	intergenic	HLA-DMB;HLA-DMA	TRAV8-1	14	22265758	0.0724388	0.309764	0.0390988	2.32595e-15	0.0128945
	rs141094656	C	T	1	92753336	intronic	GLMN	SLC18B1	6	133105105	0.0195137	-0.578048	0.0394774	1.50433e-48	0.0127861
	rs13062095	C	T	3	101267385	intergenic	FAM172BP;TRMT10C	OPLAH	8	145112451	0.350092	-0.167553	0.0123331	4.86855e-42	0.0127752
	rs149007767	T	C	7	50370254	intronic	IKZF1	MYBPH	1	203140940	0.149708	-0.223972	0.0113546	1.30779e-86	0.0127712
	rs1354034	T	C	3	56849749	intronic	ARHGEF3	PPP1R14A	19	38744554	0.381863	-0.164383	0.00812421	4.94495e-91	0.0127566
	rs13217619	C	T	6	28306671	intronic	ZSCAN31	TRBV5-1	7	142020929	0.0881228	0.281253	0.0334144	3.85918e-17	0.012713
	rs6592965	A	G	7	50427982	intronic	IKZF1	FAM104A	17	71218192	0.449532	0.160269	0.00793488	1.01943e-90	0.0127122
	rs34706883	C	A	6	27805255	downstream	H2AC15	TRAV17	14	22466092	0.0838373	-0.287416	0.034178	4.12113e-17	0.01269
	rs149007767	T	C	7	50370254	intronic	IKZF1	ALDH2	12	112226236	0.149708	-0.223061	0.0113552	6.50657e-86	0.0126674
	rs149110519	T	C	6	144385777	upstream	PLAGL1	RAB37	17	72705095	0.0526158	0.355869	0.01964	2.23212e-73	0.0126256
	rs144447022	T	G	6	29244219	ncRNA_intronic	LOC101929006	TRBV5-1	7	142020929	0.0857645	0.283726	0.0395316	7.11536e-13	0.012624
	rs1532331	G	T	5	43116830	intergenic	LOC100506639;ZNF131	TMEM237	2	202496600	0.316115	-0.170845	0.00942825	2.1959e-73	0.01262
	rs2854275	A	C	6	32628428	ncRNA_exonic	HLA-DQB1-AS1	TRAV13-2	14	22386647	0.111806	-0.251963	0.0369414	9.06611e-12	0.0126088
	rs35979828	T	C	12	54685880	downstream	NFE2	HEY1	8	80678171	0.0571059	-0.341844	0.0177547	1.31432e-82	0.0125843
	rs12973620	C	G	19	58249643	intergenic	ZNF671;ZNF776	TMEM14C	6	10727255	0.191043	0.201771	0.0100938	6.77016e-89	0.0125836
	rs1354034	T	C	3	56849749	intronic	ARHGEF3	PROSER2	10	11889807	0.381863	-0.162907	0.00903041	9.48867e-73	0.0125285
	rs3774937	C	T	4	103434253	intronic	NFKB1	GHRL	3	10330995	0.320593	0.169466	0.0126068	3.40728e-41	0.0125107
	rs660895	G	A	6	32577380	intergenic	HLA-DRB1;HLA-DQA1	TRBV10-1	7	142231831	0.177598	0.206771	0.0247876	7.323e-17	0.0124891
	rs2233956	C	T	6	31081205	upstream	C6orf15	TRBV19	7	142326704	0.157552	-0.216869	0.0278245	6.48178e-15	0.0124851
	rs10876550	G	A	12	54712308	intergenic	NFE2;COPZ1	CLEC1B	12	10152132	0.409936	0.160557	0.00802661	5.17535e-89	0.0124711
	rs13289095	T	G	9	131466489	intronic	PKN3	RP11-1D12.2	8	65721961	0.119513	0.243399	0.0292059	7.8222e-17	0.0124683
	rs505404	G	T	11	243268	intronic	PSMD13	ITGB3	17	45376435	0.222031	0.189898	0.0141569	5.01993e-41	0.012458
	rs1015166	T	C	6	32798731	intronic	TAP2	TRAV12-1	14	22309689	0.342814	0.166189	0.0213573	7.17263e-15	0.0124447
	rs1354034	T	C	3	56849749	intronic	ARHGEF3	GNAZ	22	23439882	0.381863	-0.162014	0.00812571	1.89014e-88	0.0123915
	rs505404	G	T	11	243268	intronic	PSMD13	PPBP	4	74853334	0.222031	0.189371	0.00951611	4.06929e-88	0.0123889
	rs1354034	T	C	3	56849749	intronic	ARHGEF3	PRDX6	1	173452175	0.381863	-0.161902	0.00812578	2.49526e-88	0.0123745
	rs10876550	G	A	12	54712308	intergenic	NFE2;COPZ1	RP11-501J20.5	10	119000272	0.409936	-0.159929	0.0192625	1.01857e-16	0.0123737
	rs4713555	T	G	6	32575524	intergenic	HLA-DRB1;HLA-DQA1	TRAV12-1	14	22309689	0.265418	-0.178112	0.0214554	1.02805e-16	0.0123705
	rs1354034	T	C	3	56849749	intronic	ARHGEF3	MPL	1	43810960	0.381863	-0.16183	0.0121111	1.00548e-40	0.0123635
	rs6600233	T	C	16	143503	intronic	NPRL3	ENSG00000251297	4	190904852	0.435703	-0.158432	0.0174475	1.08077e-19	0.0123428
	rs1354034	T	C	3	56849749	intronic	ARHGEF3	FHL1	X	135261538	0.381863	-0.161443	0.0121114	1.55313e-40	0.0123044
	rs1354034	T	C	3	56849749	intronic	ARHGEF3	CTSA	20	44523525	0.381863	-0.161327	0.00812614	1.04228e-87	0.0122867
	rs149110519	T	C	6	144385777	upstream	PLAGL1	DAAM2	6	39816395	0.0526158	0.350932	0.0196209	1.52701e-71	0.0122777
	rs9274623	T	G	6	32635998	intergenic	HLA-DQB1;HLA-DQA2	TRAV6	14	22237024	0.188698	-0.199753	0.0302697	4.13661e-11	0.012217
	rs2227901	A	G	4	57798189	exonic	REST	CECR6	22	17599723	0.203258	0.194148	0.00981104	3.72527e-87	0.0122084
	rs1354034	T	C	3	56849749	intronic	ARHGEF3	KIFC3	16	57844543	0.381863	-0.160731	0.0082043	1.84168e-85	0.0121962
	rs8073060	A	T	17	33875262	exonic	SLFN14	NPRL3	16	161566	0.305723	0.169478	0.00865183	1.93057e-85	0.0121932
	rs2641348	G	A	1	120437884	exonic	ADAM30	RP11-640M9.1	1	144489054	0.120038	0.239744	0.0291528	1.97319e-16	0.0121425
	rs149110519	T	C	6	144385777	upstream	PLAGL1	RP11-290F20.3	20	48890177	0.0526158	0.348425	0.0464535	6.35749e-14	0.0121029
	rs149007767	T	C	7	50370254	intronic	IKZF1	GPX3	5	150404339	0.149708	-0.217968	0.0113584	4.4864e-82	0.0120957
	rs1150757	A	G	6	32029205	exonic	TNXB	TRAV29DV5	14	22631450	0.102468	0.256217	0.0334335	1.80933e-14	0.0120749
	rs149007767	T	C	7	50370254	intronic	IKZF1	CEACAM4	19	42129393	0.149708	-0.217439	0.0172113	1.38001e-36	0.012037
	rs13217619	C	T	6	28306671	intronic	ZSCAN31	TRAV12-1	14	22309689	0.0881228	0.273602	0.033426	2.71626e-16	0.0120307
	rs55834529	G	A	6	27072542	intergenic	LINC00240;H2BC11	TRAV17	14	22466092	0.0805697	-0.284562	0.0348144	2.99073e-16	0.0119971
	rs3132468	C	T	6	31475486	intronic	MICB	TRAV26-1	14	22591759	0.257991	0.176938	0.0231746	2.2582e-14	0.0119864
	rs11212617	C	A	11	108283161	intronic	C11orf65	HIST2H2BF	1	149769086	0.434293	0.155999	0.0132255	4.12727e-32	0.0119577
	rs13062095	C	T	3	101267385	intergenic	FAM172BP;TRMT10C	ZNF285	19	44896116	0.350092	0.162037	0.00908961	4.3934e-71	0.0119479
	rs10512472	C	T	17	33884804	exonic	SLFN14	VWF	12	6145988	0.179037	0.201502	0.0103627	3.21275e-84	0.0119359
	rs13062095	C	T	3	101267385	intergenic	FAM172BP;TRMT10C	ZNF776	19	58263845	0.350092	0.161949	0.00829336	6.41016e-85	0.0119349
	rs141094656	C	T	1	92753336	intronic	GLMN	RP3-525N10.2	6	69343385	0.0195137	0.557615	0.0569559	1.23928e-22	0.0118982
	rs149110519	T	C	6	144385777	upstream	PLAGL1	AC011899.9	7	157653002	0.0526158	0.345138	0.0464589	1.09504e-13	0.0118757
	rs9271640	T	C	6	32592200	intergenic	HLA-DRB1;HLA-DQA1	TRBV7-3	7	142247362	0.221621	-0.185397	0.0260858	1.18421e-12	0.0118587
	rs7570971	A	C	2	135837906	intronic	RAB3GAP1	ENSG00000259162	14	20907784	0.441154	-0.155026	0.0196998	3.56346e-15	0.01185
	rs8073060	A	T	17	33875262	exonic	SLFN14	SLC6A8	X	152957801	0.305723	0.166954	0.0127751	4.97077e-39	0.0118327
	rs6592965	A	G	7	50427982	intronic	IKZF1	MYL4	17	45289428	0.449532	-0.154583	0.00793844	1.87143e-84	0.0118262
	rs2596500	C	A	6	31321267	downstream	HLA-B	TRBV20-1	7	142334538	0.110278	0.245312	0.0323733	3.52006e-14	0.0118089
	rs13030174	C	A	2	232271284	intergenic	B3GNT7;NCL	IGHV4-34	14	106829835	0.25264	-0.17675	0.0177896	2.91416e-23	0.0117973
	rs149007767	T	C	7	50370254	intronic	IKZF1	CLEC5A	7	141636982	0.149708	-0.215243	0.0113602	4.65713e-80	0.0117951
	rs592423	A	C	6	139840693	intergenic	LINC01625;FILNC1	PDZK1IP1	1	47652990	0.467953	0.15382	0.00792875	7.67224e-84	0.0117817
	rs17693963	C	A	6	27710165	intergenic	LINC01012;LOC100131289	TRBV5-1	7	142020929	0.0887937	0.269638	0.0333162	5.80696e-16	0.011765
	rs6592965	A	G	7	50427982	intronic	IKZF1	GPR146	7	1091554	0.449532	0.154104	0.00793874	6.15794e-84	0.011753
	rs149007767	T	C	7	50370254	intronic	IKZF1	FCGR1C	1	149349403	0.149708	-0.214847	0.0271707	2.63031e-15	0.0117517
	rs149007767	T	C	7	50370254	intronic	IKZF1	MSL3	X	11785074	0.149708	0.214713	0.0219934	1.62924e-22	0.011737
	rs12153855	C	T	6	32074804	intronic	TNXB	TRBV5-4	7	142168712	0.104023	-0.250758	0.0332173	4.38613e-14	0.011721
	rs78744187	T	C	19	33754548	intergenic	SLC7A10;CEBPA	GATA2	3	128205149	0.0806295	-0.280474	0.0168621	3.9928e-62	0.0116627
	rs6592965	A	G	7	50427982	intronic	IKZF1	PTMS	12	6877399	0.449532	-0.153393	0.00793917	3.57654e-83	0.0116448
	rs149110519	T	C	6	144385777	upstream	PLAGL1	PISD	22	32036447	0.0526158	-0.341688	0.0197094	2.50342e-67	0.0116394
	rs225245	G	A	17	33946107	intronic	AP2B1	GATA1	X	48648840	0.440335	-0.153647	0.0147733	2.47154e-25	0.0116356
	rs11602954	A	G	11	202856	downstream	BET1L	DDX11L9	15	102518028	0.211758	0.18664	0.0231972	8.56838e-16	0.0116289
	rs1354034	T	C	3	56849749	intronic	ARHGEF3	AC147651.3	7	562448	0.381863	-0.156843	0.0195071	8.96188e-16	0.0116132
	rs1354034	T	C	3	56849749	intronic	ARHGEF3	COL6A3	2	238277832	0.381863	-0.156759	0.00812896	7.31917e-83	0.0116008
	rs674313	T	C	6	32578082	intergenic	HLA-DRB1;HLA-DQA1	TRBV6-6	7	142162169	0.2631	-0.172325	0.0243654	1.52167e-12	0.0115147
	rs73396800	C	G	6	32914726	intergenic	HLA-DMB;HLA-DMA	TRBV2	7	142001001	0.0724388	0.292645	0.0391262	7.46059e-14	0.0115087
	rs12153855	C	T	6	32074804	intronic	TNXB	TRAV21	14	22521044	0.104023	0.248445	0.0148089	3.6076e-63	0.0115058
	rs10820606	C	A	9	99192919	intergenic	ZNF367;HABP4	ENKUR	10	25287996	0.236914	0.178214	0.0102306	5.8483e-68	0.0114835
	rs1354034	T	C	3	56849749	intronic	ARHGEF3	PGRMC1	X	118374322	0.381863	-0.155669	0.0150966	6.25178e-25	0.01144
	rs149110519	T	C	6	144385777	upstream	PLAGL1	RP11-326C3.13	11	325998	0.0526158	0.338627	0.0464693	3.16698e-13	0.0114318
	rs11249433	G	A	1	121280613	ncRNA_intronic	EMBP1	PARP8	5	50052044	0.397006	0.154357	0.00983975	1.85331e-55	0.0114076
	rs13062095	C	T	3	101267385	intergenic	FAM172BP;TRMT10C	ZNF773	19	58020527	0.350092	0.158234	0.0123417	1.24916e-37	0.0113937
	rs41266839	C	G	6	26409890	exonic	BTN3A1	TRAV17	14	22466092	0.0792497	-0.279172	0.035089	1.77547e-15	0.011374
	rs8073060	A	T	17	33875262	exonic	SLFN14	POLL	10	103343333	0.305723	0.16361	0.00864172	6.14531e-80	0.0113635
	rs13062095	C	T	3	101267385	intergenic	FAM172BP;TRMT10C	RP11-161M6.3	16	1046037	0.350092	-0.158022	0.0198713	1.8308e-15	0.0113632
	rs225245	G	A	17	33946107	intronic	AP2B1	MICAL2	11	12200438	0.440335	-0.151801	0.0118589	1.62689e-37	0.0113577
	rs6592965	A	G	7	50427982	intronic	IKZF1	SHISA4	1	201859621	0.449532	-0.151255	0.00794047	6.74829e-81	0.0113225
	rs1354034	T	C	3	56849749	intronic	ARHGEF3	RP11-556E13.1	10	54415815	0.381863	-0.154442	0.0201389	1.73613e-14	0.0112603
	rs9270493	C	T	6	32559110	intergenic	HLA-DRB1;HLA-DQA1	TRAV8-6	14	22447029	0.240457	0.175404	0.0297911	3.9137e-09	0.0112382
	rs8026803	C	T	15	80260014	exonic	BCL2A1	VMO1	17	4689154	0.247924	-0.173351	0.00914803	4.45799e-80	0.0112063
	rs149110519	T	C	6	144385777	upstream	PLAGL1	IER3	6	30711653	0.0526158	-0.334771	0.0306096	7.68652e-28	0.011173
	rs35033748	C	T	17	27179590	intergenic	FAM222B;ERAL1	DCAF12	9	34106891	0.215702	-0.181639	0.0103421	4.72243e-69	0.011163
	rs149007767	T	C	7	50370254	intronic	IKZF1	RP11-166N6.2	3	150682514	0.149708	0.209343	0.029919	2.61501e-12	0.0111574
	rs149007767	T	C	7	50370254	intronic	IKZF1	RP1-80N2.2	6	6702106	0.149708	-0.209154	0.0299193	2.73713e-12	0.0111372
	rs13062095	C	T	3	101267385	intergenic	FAM172BP;TRMT10C	ZNF134	19	58130162	0.350092	0.156437	0.00912797	7.69976e-66	0.0111363
	rs1354034	T	C	3	56849749	intronic	ARHGEF3	ASAP2	2	9446353	0.381863	-0.153434	0.0089422	5.43915e-66	0.0111139
	rs13062095	C	T	3	101267385	intergenic	FAM172BP;TRMT10C	ZNF551	19	58197679	0.350092	0.156158	0.00905672	1.28069e-66	0.0110966
	rs2227901	A	G	4	57798189	exonic	REST	SEZ6L	22	26672501	0.203258	0.184778	0.0146313	1.46123e-36	0.0110585
	rs505404	G	T	11	243268	intronic	PSMD13	WASH6P	X	155252671	0.222031	0.178898	0.0228099	4.39908e-15	0.0110564
	rs1354034	T	C	3	56849749	intronic	ARHGEF3	AC007879.7	2	208107492	0.381863	-0.152969	0.0195127	4.52344e-15	0.0110467
	rs3131379	A	G	6	31721033	ncRNA_intronic	MSH5-SAPCD1	TRAV29DV5	14	22631450	0.10444	0.242708	0.0331705	2.53576e-13	0.0110195
	rs1354034	T	C	3	56849749	intronic	ARHGEF3	PF4V1	4	74719389	0.381863	-0.15276	0.00813136	9.73948e-79	0.0110164
	rs149007767	T	C	7	50370254	intronic	IKZF1	CSF2RBP1	22	37348167	0.149708	-0.207864	0.0299214	3.73136e-12	0.0110002
	rs1354034	T	C	3	56849749	intronic	ARHGEF3	NDUFAF3	3	49059410	0.381863	-0.152588	0.00890898	9.27061e-66	0.0109916
	rs9274623	T	G	6	32635998	intergenic	HLA-DQB1;HLA-DQA2	TRAV23DV6	14	22554961	0.188698	-0.189463	0.0302885	3.96752e-10	0.0109908
	rs7665090	G	A	4	103551603	downstream	MANBA	LTA	6	31540966	0.494318	-0.148085	0.0117772	2.94234e-36	0.0109631
	rs149110519	T	C	6	144385777	upstream	PLAGL1	ENSG00000259143	14	95651822	0.0526158	0.331609	0.0482916	6.5658e-12	0.0109629
	rs1354034	T	C	3	56849749	intronic	ARHGEF3	HIST1H3H	6	27778078	0.381863	0.152326	0.00813162	2.68478e-78	0.010954
	rs73396800	C	G	6	32914726	intergenic	HLA-DMB;HLA-DMA	TRBV19	7	142326704	0.0724388	-0.285289	0.0391375	3.11338e-13	0.0109374
	rs9267488	G	A	6	31514247	ncRNA_intronic	ATP6V1G2-DDX39B	TRBV6-5	7	142180765	0.10306	-0.243107	0.0333677	3.20004e-13	0.0109264
	rs149110519	T	C	6	144385777	upstream	PLAGL1	SH2D3C	9	130520808	0.0526158	0.331038	0.0197165	2.89332e-63	0.0109252
	rs149007767	T	C	7	50370254	intronic	IKZF1	WWC3	X	10048060	0.149708	0.207142	0.0220024	4.75339e-21	0.0109239
	rs1354034	T	C	3	56849749	intronic	ARHGEF3	ZCCHC17	1	31803812	0.381863	-0.152096	0.00813176	4.59267e-78	0.0109209
	rs10984466	G	A	9	100707992	upstream	HEMGN	SPOCD1	1	32268837	0.356829	0.154199	0.00826213	9.82747e-78	0.010914
	rs1354034	T	C	3	56849749	intronic	ARHGEF3	MYEOV	11	69122049	0.381863	-0.151993	0.00815942	1.90868e-77	0.0109061
	rs9420589	T	G	10	94450233	intronic	HHEX	SIGLEC17P	19	51673682	0.428682	-0.149142	0.0089381	1.65431e-62	0.0108954
	rs149007767	T	C	7	50370254	intronic	IKZF1	RP1-102E24.8	12	6503653	0.149708	-0.20681	0.0299231	4.79894e-12	0.010889
	rs7189020	T	A	16	304803	intronic	FAM234A	ENSG00000173876	10	106465	0.37968	0.152034	0.0183589	1.2194e-16	0.0108879
	rs10876550	G	A	12	54712308	intergenic	NFE2;COPZ1	MYL9	20	35174057	0.409936	-0.149888	0.00803312	1.0711e-77	0.0108688
	rs149110519	T	C	6	144385777	upstream	PLAGL1	PNKD	2	219173315	0.0526158	0.329866	0.0197173	7.95048e-63	0.0108479
	rs225245	G	A	17	33946107	intronic	AP2B1	GUK1	1	228332174	0.440335	-0.14831	0.011862	7.18863e-36	0.0108414
	rs17081935	T	C	4	57823476	intergenic	REST;NOA1	SYP	X	49050493	0.202608	0.183165	0.0182534	1.07394e-23	0.0108404
	rs12478601	C	T	2	43721508	intronic	THADA	TRPM4	19	49688045	0.425396	0.148715	0.00804028	2.21145e-76	0.010812
	rs145171343	T	C	17	33886764	UTR5	SLFN14	ITGB3	17	45376435	0.0138172	0.629249	0.0588237	1.049e-26	0.0107908
	rs1354034	T	C	3	56849749	intronic	ARHGEF3	CXCR2P1	2	218927165	0.381863	-0.15116	0.00946011	1.79858e-57	0.0107869
	rs10512472	C	T	17	33884804	exonic	SLFN14	FKBP8	19	18648715	0.179037	0.191445	0.0103057	4.9794e-77	0.0107742
	rs2451279	A	G	6	159515077	intergenic	TAGAP;LOC101929122	LCN2	9	130913542	0.322497	0.156926	0.0125987	1.30204e-35	0.0107611
	rs149110519	T	C	6	144385777	upstream	PLAGL1	CERS2	1	150940269	0.0526158	0.328481	0.0224197	1.31968e-48	0.010757
	rs34706883	C	A	6	27805255	downstream	H2AC15	TRAV12-1	14	22309689	0.0838373	0.264409	0.0342117	1.08736e-14	0.0107397
	rs13062095	C	T	3	101267385	intergenic	FAM172BP;TRMT10C	ZNF417	19	58419821	0.350092	0.15332	0.012346	2.07155e-35	0.010697
	rs149007767	T	C	7	50370254	intronic	IKZF1	SERPING1	11	57373593	0.149708	-0.204832	0.0113666	1.34279e-72	0.0106817
	rs56388170	T	G	7	28724374	intronic	CREB5	CHST7	X	46445531	0.289189	0.161168	0.0161836	2.31064e-23	0.0106788
	rs10512472	C	T	17	33884804	exonic	SLFN14	RGS18	1	192141266	0.179037	-0.190386	0.0103414	1.0882e-75	0.0106554
	rs1150757	A	G	6	32029205	exonic	TNXB	TRBV6-5	7	142180765	0.102468	-0.240133	0.0334583	7.12056e-13	0.0106065
	rs3131379	A	G	6	31721033	ncRNA_intronic	MSH5-SAPCD1	TRAV35	14	22690081	0.10444	0.238081	0.0331774	7.17806e-13	0.0106033
	rs9389269	C	T	6	135427159	intergenic	HBS1L;MYB	PDZK1IP1	1	47652990	0.272314	-0.163037	0.00887684	2.43176e-75	0.0105346
	rs6592965	A	G	7	50427982	intronic	IKZF1	ITLN1	1	160850644	0.449532	-0.145774	0.0118396	7.76784e-35	0.0105168
	rs592423	A	C	6	139840693	intergenic	LINC01625;FILNC1	ESPN	1	6503139	0.467953	0.145002	0.00796104	4.00383e-74	0.0104696
	rs1354034	T	C	3	56849749	intronic	ARHGEF3	PRTFDC1	10	25189534	0.381863	-0.148827	0.00813366	8.63167e-75	0.0104565
	rs4917014	G	T	7	50305863	intergenic	SPATA48;IKZF1	LILRA4	19	54847438	0.316454	-0.155431	0.00854854	7.14106e-74	0.0104517
	rs2746427	T	A	6	135669097	intronic	AHI1	TRAV8-4	14	22362911	0.451719	-0.145216	0.019055	2.51913e-14	0.0104456
	rs505404	G	T	11	243268	intronic	PSMD13	MMRN1	4	90838231	0.222031	0.173855	0.00952549	2.00937e-74	0.010442
	rs149110519	T	C	6	144385777	upstream	PLAGL1	CYFIP2	5	156757847	0.0526158	0.323416	0.0196393	6.25024e-61	0.0104278
	rs1354034	T	C	3	56849749	intronic	ARHGEF3	TTC7B	14	91144877	0.381863	-0.148598	0.00887563	6.45574e-63	0.0104243
	rs149007767	T	C	7	50370254	intronic	IKZF1	CTC-503J8.6	19	6211441	0.149708	-0.202329	0.0233879	5.10501e-18	0.0104222
	rs4917014	G	T	7	50305863	intergenic	SPATA48;IKZF1	TNFRSF21	6	47238454	0.316454	-0.155142	0.00857809	4.1234e-73	0.0104127
	rs1354034	T	C	3	56849749	intronic	ARHGEF3	PRUNE	1	150994542	0.381863	-0.148507	0.00813385	1.79046e-74	0.0104116
	rs8026803	C	T	15	80260014	exonic	BCL2A1	MS4A7	11	60154689	0.247924	-0.16704	0.00915174	1.98379e-74	0.0104053
	rs149110519	T	C	6	144385777	upstream	PLAGL1	MPZL1	1	167725792	0.0526158	-0.32301	0.0197217	2.72826e-60	0.0104017
	rs1150753	G	A	6	32059867	intronic	TNXB	TRAV13-2	14	22386647	0.103682	-0.236435	0.033288	1.22343e-12	0.01039
	rs3094006	T	C	6	31461558	ncRNA_intronic	MICB-DT	TRBV25-1	7	142378824	0.287355	0.159204	0.0224247	1.25209e-12	0.0103808
	rs9271100	T	C	6	32576478	intergenic	HLA-DRB1;HLA-DQA1	TRBV6-1	7	142028365	0.28549	0.159491	0.0237678	1.94092e-11	0.0103778
	rs3748136	A	G	8	9030160	intergenic	PPP1R3B;LOC101929128	ARG2	14	68102476	0.189235	0.183897	0.0111023	1.27083e-61	0.0103771
	rs11212617	C	A	11	108283161	intronic	C11orf65	RP1-34B20.4	6	26202633	0.434293	0.145043	0.0191329	3.43431e-14	0.0103371
	rs1354034	T	C	3	56849749	intronic	ARHGEF3	PTK2	8	141840157	0.381863	-0.147904	0.0081342	7.03763e-74	0.0103272
	rs7189020	T	A	16	304803	intronic	FAM234A	RP11-683L23.1	18	60385	0.37968	0.148034	0.0195414	3.58023e-14	0.0103225
	rs3131379	A	G	6	31721033	ncRNA_intronic	MSH5-SAPCD1	TRAV13-2	14	22386647	0.10444	-0.234831	0.0331823	1.47309e-12	0.0103158
	rs10822184	C	T	10	65337153	intronic	REEP3	CXCL5	4	74862927	0.511758	0.143654	0.0079475	4.97929e-73	0.0103126
	rs1728785	A	C	16	68591230	intronic	ZFP90	TRGV10	7	38339667	0.219628	0.173232	0.0229079	3.96613e-14	0.0102866
	rs13289095	T	G	9	131466489	intronic	PKN3	CEACAM6	19	42265499	0.119513	0.220808	0.012826	2.02835e-66	0.0102612
	rs149007767	T	C	7	50370254	intronic	IKZF1	IGF2R	6	160462335	0.149708	-0.200627	0.0113691	1.07688e-69	0.0102476
	rs3735485	A	G	7	45009341	exonic	MYO1G	MTATP6P1	1	569416	0.162786	0.193757	0.02569	4.62463e-14	0.0102329
	rs1354034	T	C	3	56849749	intronic	ARHGEF3	CETP	16	57006759	0.381863	-0.146984	0.00816233	1.69834e-72	0.0101991
	rs149007767	T	C	7	50370254	intronic	IKZF1	TMEM91	19	41873402	0.149708	-0.200028	0.0119785	1.33503e-62	0.0101865
	rs141094656	C	T	1	92753336	intronic	GLMN	FOLR2	11	71930319	0.0195137	0.515669	0.0345824	2.78281e-50	0.0101754
	rs13062095	C	T	3	101267385	intergenic	FAM172BP;TRMT10C	ZNF304	19	57866970	0.350092	0.149411	0.00846978	1.20391e-69	0.0101585
	rs1354034	T	C	3	56849749	intronic	ARHGEF3	CCDC92	12	124430292	0.381863	-0.146645	0.00813492	1.20476e-72	0.0101521
	rs149110519	T	C	6	144385777	upstream	PLAGL1	RILPL1	12	123987095	0.0526158	0.318985	0.0220367	1.73819e-47	0.0101441
	rs1354034	T	C	3	56849749	intronic	ARHGEF3	SDC4	20	43965496	0.381863	-0.146558	0.00816258	4.39372e-72	0.0101401
	rs10512472	C	T	17	33884804	exonic	SLFN14	ANKRD9	14	102974657	0.179037	0.185654	0.0103441	4.99294e-72	0.0101322
	rs9270965	A	G	6	32573471	intergenic	HLA-DRB1;HLA-DQA1	B9D2	19	41865202	0.331934	0.151145	0.00962003	1.26159e-55	0.0101319
	rs145171343	T	C	17	33886764	UTR5	SLFN14	MYL9	20	35174057	0.0138172	0.609589	0.0417341	2.55301e-48	0.010127
	rs141094656	C	T	1	92753336	intronic	GLMN	CACNA2D3	3	54632579	0.0195137	0.514187	0.0345834	5.31784e-50	0.010117
	rs34164888	A	C	6	25521921	intronic	CARMIL1	RNF5P1	8	38458448	0.213167	0.173546	0.0231589	6.69587e-14	0.0101033
	rs55908509	A	G	19	16442019	intergenic	KLF2;EPS15L1	NRXN2	11	64432153	0.3284	-0.151155	0.00994208	3.3471e-52	0.0100784
	rs2233956	C	T	6	31081205	upstream	C6orf15	TRAV29DV5	14	22631450	0.157552	0.194797	0.0278584	2.70223e-12	0.0100731
	rs8073060	A	T	17	33875262	exonic	SLFN14	YY1AP1	1	155644014	0.305723	0.153954	0.0086474	6.63872e-71	0.0100617
	rs615672	C	G	6	32574171	intergenic	HLA-DRB1;HLA-DQA1	TRAV8-4	14	22362911	0.373068	0.146558	0.0224232	6.31859e-11	0.0100475
	rs532098	A	G	6	32578052	intergenic	HLA-DRB1;HLA-DQA1	TRBV9	7	142239797	0.420328	-0.143447	0.0156742	5.59927e-20	0.0100273
	rs653178	T	C	12	112007756	intronic	ATXN2	STAT1	2	191857385	0.539991	-0.142028	0.00837384	1.59877e-64	0.0100214
	rs1354034	T	C	3	56849749	intronic	ARHGEF3	XPNPEP1	10	111653917	0.381863	-0.145583	0.00813552	1.29461e-71	0.0100057
	rs149110519	T	C	6	144385777	upstream	PLAGL1	MAP4K2	11	64563501	0.0526158	0.316747	0.0196435	1.70811e-58	0.0100023
	rs149110519	T	C	6	144385777	upstream	PLAGL1	PKN1	19	14563272	0.0526158	0.316411	0.0197259	6.67232e-58	0.00998105
	rs28421666	G	A	6	32592737	intergenic	HLA-DRB1;HLA-DQA1	TRBV5-1	7	142020929	0.0452797	-0.339612	0.0516402	4.81651e-11	0.00997184
	rs10512472	C	T	17	33884804	exonic	SLFN14	RNF10	12	120993340	0.179037	0.184018	0.01031	2.96904e-71	0.00995448
	rs6592965	A	G	7	50427982	intronic	IKZF1	KRT1	12	53071355	0.449532	0.141788	0.00867068	4.16809e-60	0.00994953
	rs3132565	G	A	6	31102964	intronic	PSORS1C1	TRAV23DV6	14	22554961	0.482941	-0.141091	0.0161805	2.78694e-18	0.00994176
	rs6084653	G	C	20	4157072	intronic	SMOX	RNF10	12	120993340	0.36636	-0.146319	0.00821883	6.71024e-71	0.00993991
	rs225245	G	A	17	33946107	intronic	AP2B1	CNPPD1	2	220039723	0.440335	-0.141984	0.00903415	1.16773e-55	0.00993625
	rs13062095	C	T	3	101267385	intergenic	FAM172BP;TRMT10C	ZNF772	19	57983484	0.350092	0.147644	0.00906211	1.11756e-59	0.00991958
	rs8073060	A	T	17	33875262	exonic	SLFN14	FAM134A	2	220045574	0.305723	0.152839	0.00864804	6.73399e-70	0.00991657
	rs8073060	A	T	17	33875262	exonic	SLFN14	RNF123	3	49742947	0.305723	0.152821	0.00864805	7.00182e-70	0.00991412
	rs149110519	T	C	6	144385777	upstream	PLAGL1	DHRS9	2	169936988	0.0526158	-0.315192	0.0196445	6.21589e-58	0.00990425
	rs7785014	T	C	7	137881690	intergenic	MIR4468;TRIM24	ALDH1A1	9	75605468	0.331668	-0.14913	0.00846074	1.55318e-69	0.0098595
	rs7210990	A	C	17	16170764	intronic	PIGL	TBL1X	X	9559557	0.481977	0.140507	0.0146905	1.12745e-21	0.00985827
	rs141094656	C	T	1	92753336	intronic	GLMN	RTN1	14	60200189	0.0195137	0.507568	0.034588	9.36287e-49	0.00985824
	rs11066301	G	A	12	112871372	intronic	PTPN11	GBP5	1	89731588	0.400736	0.143242	0.0120224	9.93418e-33	0.00985478
	rs3896594	G	T	2	8762414	intergenic	LINC01814;ID2-AS1	TTC25	17	40102268	0.377086	0.144756	0.00817094	3.16131e-70	0.00984395
	rs149007767	T	C	7	50370254	intronic	IKZF1	CYP27A1	2	219663244	0.149708	-0.196512	0.0113714	6.51777e-67	0.00983156
	rs149007767	T	C	7	50370254	intronic	IKZF1	THBD	20	23028324	0.149708	-0.196446	0.0113715	7.2197e-67	0.00982491
	rs10512472	C	T	17	33884804	exonic	SLFN14	44987	19	8491027	0.179037	0.182687	0.0103108	3.04008e-70	0.00981098
	rs13062095	C	T	3	101267385	intergenic	FAM172BP;TRMT10C	CTD-2162K18.5	19	37303718	0.350092	0.146817	0.0198869	1.55228e-13	0.00980883
	rs660895	G	A	6	32577380	intergenic	HLA-DRB1;HLA-DQA1	TRAV41	14	22788871	0.177598	0.182881	0.0248217	1.73467e-13	0.00976992
	rs149007767	T	C	7	50370254	intronic	IKZF1	GRAMD1A	19	35501531	0.149708	-0.19532	0.0113721	4.06546e-66	0.0097126
	rs4713555	T	G	6	32575524	intergenic	HLA-DRB1;HLA-DQA1	TRAV21	14	22521044	0.265418	0.15745	0.0100267	1.44028e-55	0.00966684
	rs1354034	T	C	3	56849749	intronic	ARHGEF3	MOB3C	1	47077975	0.381863	-0.142975	0.00903652	2.19759e-56	0.00965032
	rs6592965	A	G	7	50427982	intronic	IKZF1	SIAH2	3	150470089	0.449532	0.139527	0.00794724	5.29535e-69	0.00963466
	rs1354034	T	C	3	56849749	intronic	ARHGEF3	TLN1	9	35714668	0.381863	-0.142817	0.00813707	5.80317e-69	0.00962901
	rs8026803	C	T	15	80260014	exonic	BCL2A1	CDKN1C	11	2905777	0.247924	-0.160642	0.0136455	5.40972e-32	0.00962336
	rs2596500	C	A	6	31321267	downstream	HLA-B	TRAV38-1	14	22740148	0.110278	-0.221397	0.0324092	8.41485e-12	0.00961869
	rs1354034	T	C	3	56849749	intronic	ARHGEF3	DNM3	1	172099113	0.381863	-0.142623	0.00813717	8.85259e-69	0.00960294
	rs3132468	C	T	6	31475486	intronic	MICB	TRBV4-1	7	142013248	0.257991	-0.158369	0.0232026	8.76196e-12	0.00960252
	rs11602954	A	G	11	202856	downstream	BET1L	GP9	3	128780429	0.211758	0.169592	0.0106595	5.40998e-57	0.00960148
	rs17696736	G	A	12	112486818	intronic	NAA25	GBP5	1	89731588	0.408694	0.140832	0.0119862	7.10379e-32	0.00958616
	rs1354034	T	C	3	56849749	intronic	ARHGEF3	FAXDC2	5	154218431	0.381863	-0.142418	0.00887943	6.81346e-58	0.00957531
	rs56330463	T	C	5	148200011	intergenic	HTR4;ADRB2	ALG1L13P	8	8097857	0.417903	0.140285	0.0192354	3.02903e-13	0.00957471
	rs13217619	C	T	6	28306671	intronic	ZSCAN31	TRAV17	14	22466092	0.0881228	-0.243986	0.0272998	3.98795e-19	0.0095672
	rs56330463	T	C	5	148200011	intergenic	HTR4;ADRB2	RP11-76E17.3	15	94413961	0.417903	0.140091	0.0192356	3.26719e-13	0.0095482
	rs149007767	T	C	7	50370254	intronic	IKZF1	ITPKB-IT1	1	226853554	0.149708	-0.19338	0.0299438	1.06026e-10	0.00952062
	rs149110519	T	C	6	144385777	upstream	PLAGL1	ARAP3	5	141047378	0.0526158	0.308962	0.0196483	1.02597e-55	0.00951661
	rs10820606	C	A	9	99192919	intergenic	ZNF367;HABP4	ACSBG1	15	78498920	0.236914	0.16223	0.010275	3.71582e-56	0.00951609
	rs10876550	G	A	12	54712308	intergenic	NFE2;COPZ1	FRMD3	9	86005683	0.409936	-0.140108	0.00804377	6.00363e-68	0.00949666
	rs149007767	T	C	7	50370254	intronic	IKZF1	RP1-193H18.2	17	67548750	0.149708	-0.193074	0.0299442	1.13485e-10	0.00949057
	rs1354034	T	C	3	56849749	intronic	ARHGEF3	MAP1A	15	43813487	0.381863	-0.141759	0.00816527	1.62296e-67	0.00948687
	rs149110519	T	C	6	144385777	upstream	PLAGL1	ARID3A	19	950860	0.0526158	0.307619	0.0196491	3.0423e-55	0.00943406
	rs55834529	G	A	6	27072542	intergenic	LINC00240;H2BC11	TRBV5-1	7	142020929	0.0805697	0.252255	0.0348596	4.61091e-13	0.00942755
	rs149007767	T	C	7	50370254	intronic	IKZF1	CHSY1	15	101754032	0.149708	-0.192334	0.0113738	3.78422e-64	0.00941789
	rs1354034	T	C	3	56849749	intronic	ARHGEF3	CD226	18	67563716	0.381863	-0.14124	0.00816556	4.94671e-67	0.0094176
	rs149110519	T	C	6	144385777	upstream	PLAGL1	ATP6V1A	3	113498384	0.0526158	-0.307221	0.0306369	1.15051e-23	0.00940965
	rs3132468	C	T	6	31475486	intronic	MICB	TRAV38-2DV8	14	22749309	0.257991	0.156758	0.0232049	1.42442e-11	0.00940813
	rs149007767	T	C	7	50370254	intronic	IKZF1	TNFRSF9	1	7990416	0.149708	-0.192221	0.0113739	4.48383e-64	0.00940686
	rs6592965	A	G	7	50427982	intronic	IKZF1	RP11-497H16.2	5	69785194	0.449532	-0.137843	0.00943287	2.3207e-48	0.0094035
	rs149110519	T	C	6	144385777	upstream	PLAGL1	ORM1	9	117087045	0.0526158	0.307081	0.030637	1.20536e-23	0.0094011
	rs8073060	A	T	17	33875262	exonic	SLFN14	MYL9	20	35174057	0.305723	0.148776	0.00865031	2.7062e-66	0.00939627
	rs6592965	A	G	7	50427982	intronic	IKZF1	RPIA	2	89020807	0.449532	0.137678	0.00794826	3.22122e-67	0.00938108
	rs144447022	T	G	6	29244219	ncRNA_intronic	LOC101929006	TRAV12-1	14	22309689	0.0857645	0.244497	0.0395966	6.62892e-10	0.00937441
	rs149007767	T	C	7	50370254	intronic	IKZF1	SOWAHD	X	118893370	0.149708	-0.191864	0.0234003	2.41992e-16	0.00937192
	rs73396800	C	G	6	32914726	intergenic	HLA-DMB;HLA-DMA	TRBV20-1	7	142334538	0.0724388	0.263814	0.0391689	1.63592e-11	0.00935275
	rs111778408	A	G	14	35572163	ncRNA_intronic	LOC101927178	IL2RG	X	70329606	0.100785	-0.226908	0.0243898	1.36025e-20	0.00933234
	rs10512472	C	T	17	33884804	exonic	SLFN14	AP001189.4	11	76371505	0.179037	0.178172	0.0247489	6.05669e-13	0.00933203
	rs11212617	C	A	11	108283161	intronic	C11orf65	HIST1H4H	6	26283522	0.434293	0.137774	0.00805342	1.30481e-65	0.00932693
	rs9271640	T	C	6	32592200	intergenic	HLA-DRB1;HLA-DQA1	TRAV41	14	22788871	0.221621	-0.164325	0.0261193	3.14818e-10	0.00931616
	rs11602954	A	G	11	202856	downstream	BET1L	PARVB	22	44480098	0.211758	0.166946	0.0106611	2.86588e-55	0.0093043
	rs3184504	C	T	12	111884608	exonic	SH2B3	OBFC1	10	105660131	0.542056	-0.136875	0.0131751	2.78547e-25	0.00930109
	rs149110519	T	C	6	144385777	upstream	PLAGL1	RP11-295P9.3	10	13669652	0.0526158	0.30475	0.0465204	5.71913e-11	0.00925892
	rs10423726	C	A	19	16444697	intergenic	KLF2;EPS15L1	DGKK	X	50161072	0.404467	0.138599	0.0191705	4.83706e-13	0.00925416
	rs145171343	T	C	17	33886764	UTR5	SLFN14	ITGA2B	17	42458210	0.0138172	0.581513	0.0419692	1.17506e-43	0.00921566
	rs55908509	A	G	19	16442019	intergenic	KLF2;EPS15L1	SBK1	16	28319505	0.3284	-0.144461	0.00994646	8.55038e-48	0.00920551
	rs79755767	A	G	12	54698408	intergenic	NFE2;COPZ1	HPS1	10	100191319	0.0977363	-0.228425	0.013565	1.25715e-63	0.00920251
	rs73396800	C	G	6	32914726	intergenic	HLA-DMB;HLA-DMA	TRAV35	14	22690081	0.0724388	0.261676	0.0391718	2.38616e-11	0.00920176
	rs28383314	T	C	6	32587213	intergenic	HLA-DRB1;HLA-DQA1	RP11-291B21.2	12	10708305	0.383654	-0.139475	0.0220884	2.71212e-10	0.00920001
	rs8887	T	C	19	4502201	UTR3	HDGFL2	TGM2	20	36775921	0.460179	-0.136053	0.00865051	9.76959e-56	0.00919646
	rs6967414	A	G	7	6749758	intergenic	ZNF12;PMS2CL	CREB5	7	28602225	0.124674	-0.205257	0.0121311	3.20975e-64	0.0091954
	rs1354034	T	C	3	56849749	intronic	ARHGEF3	TSC22D1	13	45079469	0.381863	0.139373	0.00824222	3.81646e-64	0.00917028
	rs592423	A	C	6	139840693	intergenic	LINC01625;FILNC1	AHSP	16	31539654	0.467953	0.135631	0.00793926	1.96605e-65	0.00916013
	rs149007767	T	C	7	50370254	intronic	IKZF1	PDXK	21	45160581	0.149708	-0.189452	0.0113754	2.8068e-62	0.00913781
	rs9267488	G	A	6	31514247	ncRNA_intronic	ATP6V1G2-DDX39B	TRAV26-1	14	22591759	0.10306	-0.222187	0.033398	2.87764e-11	0.00912684
	rs1354034	T	C	3	56849749	intronic	ARHGEF3	SYTL4	X	99958299	0.381863	-0.13899	0.0151143	3.71868e-20	0.00911987
	rs4848370	T	C	2	111811665	intronic	ACOXL	KIR2DL4	19	55280987	0.269386	-0.152162	0.0165522	3.8239e-20	0.00911397
	rs144447022	T	G	6	29244219	ncRNA_intronic	LOC101929006	TRAV17	14	22466092	0.0857645	-0.240989	0.0304922	2.71615e-15	0.00910731
	rs9402686	A	G	6	135427817	intergenic	HBS1L;MYB	RP11-77H9.8	16	9058705	0.272456	-0.151564	0.0213138	1.15122e-12	0.00910709
	rs11212617	C	A	11	108283161	intronic	C11orf65	HIST1H2AC	6	26131858	0.434293	0.136138	0.00802674	1.60695e-64	0.00910678
	rs149007767	T	C	7	50370254	intronic	IKZF1	P2RY10	X	78209140	0.149708	0.189072	0.0220227	9.05997e-18	0.00910113
	rs12614	T	C	6	31914179	exonic	CFB	TRAV12-1	14	22309689	0.103377	0.221502	0.0333532	3.11351e-11	0.00909533
	rs28383314	T	C	6	32587213	intergenic	HLA-DRB1;HLA-DQA1	TRAV5	14	22217725	0.383654	-0.138672	0.0220896	3.43618e-10	0.00909434
	rs1354034	T	C	3	56849749	intronic	ARHGEF3	RP11-33B1.1	4	120424563	0.381863	-0.138772	0.0140872	6.79329e-23	0.00909124
	rs8073060	A	T	17	33875262	exonic	SLFN14	RILP	17	1551407	0.305723	0.14632	0.00865165	3.64554e-64	0.00908865
	rs1150754	T	C	6	32050758	intronic	TNXB	TRAV38-1	14	22740148	0.13399	-0.197877	0.0298098	3.17968e-11	0.00908692
	rs2293889	T	G	8	116599199	intronic	TRPS1	PLA2G7	6	46687684	0.399397	0.137595	0.0154258	4.67131e-19	0.00908297
	rs55834529	G	A	6	27072542	intergenic	LINC00240;H2BC11	TRAV12-1	14	22309689	0.0805697	0.247505	0.0348658	1.25845e-12	0.0090759
	rs13062095	C	T	3	101267385	intergenic	FAM172BP;TRMT10C	ZNF544	19	58764387	0.350092	0.141211	0.00831062	9.47684e-65	0.00907402
	rs9420589	T	G	10	94450233	intronic	HHEX	DTHD1	4	36315311	0.428682	0.135554	0.00880498	1.76279e-53	0.00900057
	rs653178	T	C	12	112007756	intronic	ATXN2	GBP1	1	89524522	0.539991	-0.134564	0.0084099	1.26346e-57	0.00899586
	rs149007767	T	C	7	50370254	intronic	IKZF1	TBL1X	X	9559557	0.149708	0.187932	0.0220239	1.42477e-17	0.00899178
	rs10512472	C	T	17	33884804	exonic	SLFN14	RPS12	6	133137141	0.179037	0.174657	0.0229137	2.49002e-14	0.00896745
	rs41266839	C	G	6	26409890	exonic	BTN3A1	TRBV5-1	7	142020929	0.0792497	0.247882	0.0351317	1.71611e-12	0.00896726
	rs1354034	T	C	3	56849749	intronic	ARHGEF3	SRC	20	36003770	0.381863	-0.137774	0.00813981	2.8939e-64	0.00896106
	rs2066807	G	C	12	56740682	exonic	STAT2	MAFG-AS1	17	79887167	0.0699741	-0.262218	0.0228129	1.40919e-30	0.00894926
	rs56388170	T	G	7	28724374	intronic	CREB5	MTHFS	15	80157824	0.289189	0.147532	0.00876823	1.58181e-63	0.0089482
	rs1354034	T	C	3	56849749	intronic	ARHGEF3	NT5M	17	17228813	0.381863	-0.137633	0.00813988	3.89496e-64	0.00894271
	rs4761234	C	T	12	69732105	intergenic	CPSF6;LYZ	SNHG10	14	95999921	0.459799	-0.134154	0.00921126	4.75202e-48	0.00894044
	rs35979828	T	C	12	54685880	downstream	NFE2	TMEM158	3	45266864	0.0571059	-0.288119	0.0175628	1.75837e-60	0.00893958
	rs55908509	A	G	19	16442019	intergenic	KLF2;EPS15L1	NPDC1	9	139937288	0.3284	-0.142304	0.0188309	4.12789e-14	0.00893255
	rs2013208	C	T	3	50129399	intronic	RBM5	RP4-778K6.3	7	104945906	0.469446	0.13389	0.0222412	1.74525e-09	0.00892978
	rs10876550	G	A	12	54712308	intergenic	NFE2;COPZ1	ABLIM3	5	148580575	0.409936	-0.135789	0.00804103	5.60831e-64	0.00892018
	rs6993770	T	A	8	106581528	intronic	ZFPM2	RP11-501J20.5	10	119000272	0.273922	-0.149698	0.0212802	1.99833e-12	0.00891394
	rs149110519	T	C	6	144385777	upstream	PLAGL1	WAS	X	48542401	0.0526158	0.299	0.0424722	1.92378e-12	0.00891281
	rs2596500	C	A	6	31321267	downstream	HLA-B	TRBV7-3	7	142247362	0.110278	0.213098	0.0324207	4.93446e-11	0.00891114
	rs8082605	T	G	17	33864771	UTR5	SLFN12L	UBXN6	19	4451407	0.0436372	0.326596	0.0199495	3.07604e-60	0.0089029
	rs6084653	G	C	20	4157072	intronic	SMOX	BPGM	7	134348062	0.36636	0.138248	0.00822326	2.00005e-63	0.00887354
	rs1354034	T	C	3	56849749	intronic	ARHGEF3	GSTO1	10	106011165	0.381863	-0.137053	0.00816782	3.44146e-63	0.00886744
	rs10512472	C	T	17	33884804	exonic	SLFN14	45174	22	19707141	0.179037	0.17358	0.0103507	4.05873e-63	0.00885718
	rs6592965	A	G	7	50427982	intronic	IKZF1	TSTA3	8	144697503	0.449532	-0.133776	0.00795036	1.56322e-63	0.00885684
	rs505401	T	A	19	6011141	ncRNA_intronic	LOC100128568	FSTL1	3	120140620	0.0877483	-0.235107	0.0174592	2.47603e-41	0.00884939
	rs56388170	T	G	7	28724374	intronic	CREB5	BCL2A1	15	80258509	0.289189	0.146507	0.0130013	1.87528e-29	0.00882429
	rs149110519	T	C	6	144385777	upstream	PLAGL1	WWC3	X	10048060	0.0526158	-0.297266	0.0424744	2.58348e-12	0.00880971
	rs149007767	T	C	7	50370254	intronic	IKZF1	RP4-613B23.1	3	42669667	0.149708	-0.185857	0.0299547	5.48362e-10	0.00879431
	rs11212617	C	A	11	108283161	intronic	C11orf65	HIST1H2BC	6	26119627	0.434293	0.133667	0.00877052	1.90408e-52	0.00877917
	rs35979828	T	C	12	54685880	downstream	NFE2	ZNF185	X	152112505	0.0571059	-0.285455	0.0316511	1.90161e-19	0.00877503
	rs141094656	C	T	1	92753336	intronic	GLMN	KCNK13	14	90590155	0.0195137	-0.476783	0.0346082	3.52486e-43	0.00869868
	rs41266839	C	G	6	26409890	exonic	BTN3A1	TRAV12-1	14	22309689	0.0792497	0.244104	0.0351365	3.72343e-12	0.00869598
	rs56388170	T	G	7	28724374	intronic	CREB5	NLRC4	2	32470222	0.289189	-0.145269	0.00876943	1.23953e-61	0.00867586
	rs10512472	C	T	17	33884804	exonic	SLFN14	MMD	17	53484663	0.179037	0.171646	0.0103168	3.72241e-62	0.00866091
	rs73396800	C	G	6	32914726	intergenic	HLA-DMB;HLA-DMA	TRBV6-5	7	142180765	0.0724388	-0.25358	0.0391829	9.69064e-11	0.0086412
	rs9272346	G	A	6	32604372	upstream	HLA-DQA1	TRBV11-1	7	142224052	0.439877	0.132198	0.0237925	2.75553e-08	0.00861187
	rs149007767	T	C	7	50370254	intronic	IKZF1	FCGR1B	1	120931458	0.149708	-0.183604	0.0272143	1.5135e-11	0.00858235
	rs149007767	T	C	7	50370254	intronic	IKZF1	CLEC2B	12	10014159	0.149708	0.183571	0.0172414	1.79882e-26	0.00857925
	rs6592965	A	G	7	50427982	intronic	IKZF1	ALDH5A1	6	24516257	0.449532	0.131638	0.00795149	1.47097e-61	0.00857597
	rs6927022	G	A	6	32612397	downstream	HLA-DQA1	TRBV4-1	7	142013248	0.418859	0.132657	0.0223909	3.13058e-09	0.00856725
	rs7127307	C	T	11	128187383	intergenic	LINC02098;ETS1	DGKK	X	50161072	0.499077	-0.130868	0.017573	9.54143e-14	0.00856321
	rs73396800	C	G	6	32914726	intergenic	HLA-DMB;HLA-DMA	TRAV17	14	22466092	0.0724388	-0.252357	0.0312145	6.23686e-16	0.00855803
	rs1150753	G	A	6	32059867	intronic	TNXB	TRAV13-1	14	22337283	0.103682	-0.214312	0.0333191	1.25853e-10	0.00853668
	rs10761731	T	A	10	65027610	intronic	JMJD1C	ITGB3	17	45376435	0.422049	0.132227	0.0119369	1.62036e-28	0.00852945
	rs1375493	G	A	2	182323766	intronic	ITGA4	LCN2	9	130913542	0.434923	-0.131729	0.0118921	1.62217e-28	0.0085293
	rs3094006	T	C	6	31461558	ncRNA_intronic	MICB-DT	TRAV38-1	14	22740148	0.287355	0.144281	0.0224457	1.29294e-10	0.00852589
	rs3184504	C	T	12	111884608	exonic	SH2B3	FCGR1B	1	120931458	0.542056	-0.130959	0.0176359	1.12185e-13	0.00851449
	rs56388170	T	G	7	28724374	intronic	CREB5	PYGL	14	51368031	0.289189	-0.143731	0.00877024	2.31077e-60	0.00849312
	rs8026803	C	T	15	80260014	exonic	BCL2A1	CKB	14	103987722	0.247924	-0.150884	0.00916059	5.92823e-61	0.00848979
	rs6903823	G	A	6	28322296	intronic	ZKSCAN3;ZSCAN31	TRAV29DV5	14	22631450	0.205728	0.16115	0.0234824	6.76184e-12	0.00848702
	rs793108	C	T	10	31415106	intergenic	ZNF438;LINC02664	HKDC1	10	71003687	0.495527	0.13015	0.00791162	8.31787e-61	0.00846885
	rs149007767	T	C	7	50370254	intronic	IKZF1	RP11-154D6.1	6	71984545	0.149708	-0.182261	0.0318844	1.08868e-08	0.00845725
	rs4982731	C	T	14	23585333	intergenic	LMLN2;CEBPE	HDC	15	50546201	0.278225	-0.145103	0.00882732	1.02238e-60	0.00845636
	rs10820606	C	A	9	99192919	intergenic	ZNF367;HABP4	FSTL1	3	120140620	0.236914	0.152845	0.0116017	1.23366e-39	0.00844685
	rs8073060	A	T	17	33875262	exonic	SLFN14	PINK1	1	20968976	0.305723	0.141002	0.00865448	1.11756e-59	0.00844002
	rs8026803	C	T	15	80260014	exonic	BCL2A1	ENSG00000225612	7	155059385	0.247924	-0.150421	0.0226914	3.37969e-11	0.00843781
	rs10820606	C	A	9	99192919	intergenic	ZNF367;HABP4	EHD3	2	31474596	0.236914	-0.152463	0.0102387	3.77651e-50	0.0084047
	rs2233956	C	T	6	31081205	upstream	C6orf15	TRAV26-1	14	22591759	0.157552	-0.17776	0.0278821	1.82486e-10	0.00838809
	rs7570971	A	C	2	135837906	intronic	RAB3GAP1	ENSG00000229961	1	157156186	0.441154	-0.13031	0.0197344	4.02376e-11	0.00837281
	rs1354034	T	C	3	56849749	intronic	ARHGEF3	VSIG2	11	124619751	0.381863	-0.13259	0.00814253	1.29049e-59	0.0082993
	rs412658	T	C	19	22359440	intergenic	ZNF257;ZNF676	CPSF1P1	22	32667232	0.359001	-0.134221	0.0161426	9.19847e-17	0.00829133
	rs149110519	T	C	6	144385777	upstream	PLAGL1	PITPNM1	11	67266486	0.0526158	0.288386	0.0196605	1.02891e-48	0.00829124
	rs1354034	T	C	3	56849749	intronic	ARHGEF3	CPNE5	6	36758165	0.381863	-0.132476	0.00814258	1.62479e-59	0.00828505
	rs6592965	A	G	7	50427982	intronic	IKZF1	XK	X	37568197	0.449532	0.129242	0.0147681	2.10722e-18	0.00826664
	rs505404	G	T	11	243268	intronic	PSMD13	PROS1	3	93642395	0.222031	0.154573	0.014187	1.21233e-27	0.00825422
	rs35979828	T	C	12	54685880	downstream	NFE2	WLS	1	68631472	0.0571059	-0.276467	0.0176324	2.08892e-55	0.00823115
	rs1354034	T	C	3	56849749	intronic	ARHGEF3	TUBA8	22	18603797	0.381863	-0.13202	0.00814282	4.07485e-59	0.00822818
	rs149007767	T	C	7	50370254	intronic	IKZF1	VNN2	6	133074803	0.149708	0.179569	0.0124825	6.3631e-47	0.00820932
	rs2164983	A	C	19	8789381	UTR3	NFILZ	KIR2DL4	19	55280987	0.160985	-0.174278	0.019992	2.84663e-18	0.00820483
	rs1354034	T	C	3	56849749	intronic	ARHGEF3	ATP9A	20	50299113	0.381863	-0.131804	0.00892154	2.16494e-49	0.00820126
	rs9267488	G	A	6	31514247	ncRNA_intronic	ATP6V1G2-DDX39B	TRBV25-1	7	142378824	0.10306	-0.210613	0.0334136	2.91562e-10	0.00820073
	rs3131379	A	G	6	31721033	ncRNA_intronic	MSH5-SAPCD1	TRAV38-1	14	22740148	0.10444	-0.209259	0.0332178	2.98415e-10	0.00819144
	rs6084653	G	C	20	4157072	intronic	SMOX	FOXO4	X	70319716	0.36636	-0.132816	0.015248	3.02804e-18	0.00819
	rs149110519	T	C	6	144385777	upstream	PLAGL1	SULT1A2	16	28605847	0.0526158	0.286434	0.0306559	9.32011e-21	0.00817938
	rs111778408	A	G	14	35572163	ncRNA_intronic	LOC101927178	GHRLOS	3	10330903	0.100785	-0.212419	0.0291925	3.42592e-13	0.00817854
	rs2594836	G	A	5	173205318	intergenic	LINC01484;LINC01485	MED30	8	118542726	0.250349	-0.147545	0.00914893	1.64835e-58	0.00817115
	rs141094656	C	T	1	92753336	intronic	GLMN	CLIC2	X	154534733	0.0195137	-0.461904	0.0790011	5.01119e-09	0.00816421
	rs149007767	T	C	7	50370254	intronic	IKZF1	CACNB4	2	152822441	0.149708	-0.179073	0.011381	8.78858e-56	0.00816405
	rs8026803	C	T	15	80260014	exonic	BCL2A1	AC079325.6	17	72560168	0.247924	-0.147931	0.0219865	1.71657e-11	0.00816077
	rs78744187	T	C	19	33754548	intergenic	SLC7A10;CEBPA	RP11-13A1.1	12	89408957	0.0806295	-0.234591	0.0261517	2.9544e-19	0.00815902
	rs149007767	T	C	7	50370254	intronic	IKZF1	LTB4R	14	24783949	0.149708	-0.17901	0.0114218	2.3249e-55	0.00815824
	rs7213285	A	G	17	27206029	downstream	FLOT2	YBX1	1	43158059	0.160464	0.173809	0.0239442	3.90251e-13	0.00813935
	rs28421666	G	A	6	32592737	intergenic	HLA-DRB1;HLA-DQA1	TRAV23DV6	14	22554961	0.0452797	0.306774	0.051688	2.93666e-09	0.00813665
	rs6986779	T	C	8	142337790	intergenic	SLC45A4;LINC01300	SAT1	X	23802816	0.349935	0.133667	0.0154039	4.04563e-18	0.00812875
	rs653178	T	C	12	112007756	intronic	ATXN2	ENSG00000263463	22	42319263	0.539991	0.127805	0.0196628	8.04269e-11	0.00811475
	rs149007767	T	C	7	50370254	intronic	IKZF1	KIAA1324	1	109702851	0.149708	-0.178427	0.0115258	4.68349e-54	0.00810521
	rs56388170	T	G	7	28724374	intronic	CREB5	RP11-166N6.2	3	150682514	0.289189	-0.140347	0.0209407	2.05445e-11	0.00809786
	rs10820606	C	A	9	99192919	intergenic	ZNF367;HABP4	CABP5	19	48540260	0.236914	0.149614	0.0102824	5.79777e-48	0.00809356
	rs73396800	C	G	6	32914726	intergenic	HLA-DMB;HLA-DMA	TRAV29DV5	14	22631450	0.0724388	0.245031	0.0391942	4.06009e-10	0.00806835
	rs1150757	A	G	6	32029205	exonic	TNXB	TRBV25-1	7	142378824	0.102468	-0.208981	0.0335018	4.43484e-10	0.00803305
	rs3184504	C	T	12	111884608	exonic	SH2B3	PSME2	14	24614676	0.542056	-0.127027	0.0176404	5.98164e-13	0.00801084
	rs78744187	T	C	19	33754548	intergenic	SLC7A10;CEBPA	ENSG00000204455	11	89591033	0.0806295	-0.232299	0.0384411	1.51275e-09	0.00800037
	rs9271100	T	C	6	32576478	intergenic	HLA-DRB1;HLA-DQA1	TRAV9-2	14	22409580	0.28549	0.139992	0.0237964	4.0314e-09	0.0079953
	rs145171343	T	C	17	33886764	UTR5	SLFN14	C7orf41	7	30188402	0.0138172	0.541631	0.0480301	1.70654e-29	0.00799492
	rs2596500	C	A	6	31321267	downstream	HLA-B	TRAV13-2	14	22386647	0.110278	-0.201774	0.0324358	4.94942e-10	0.00798917
	rs149007767	T	C	7	50370254	intronic	IKZF1	CNTNAP3	9	39180538	0.149708	0.17712	0.0272224	7.69731e-11	0.0079869
	rs149110519	T	C	6	144385777	upstream	PLAGL1	CLMN	14	95720489	0.0526158	0.282967	0.030659	2.71898e-20	0.00798259
	rs505401	T	A	19	6011141	ncRNA_intronic	LOC100128568	AQP10	1	154295683	0.0877483	-0.223279	0.0154725	3.31697e-47	0.00798142
	rs7846314	T	A	8	61650831	intronic	CHD7	TSHZ3	19	31803152	0.178349	0.16496	0.011303	3.04883e-48	0.00797531
	rs611203	G	A	2	219472325	upstream	PLCD4	NEK3	13	52720385	0.406887	-0.128535	0.00843071	1.75032e-52	0.0079741
	rs6993770	T	A	8	106581528	intronic	ZFPM2	CXCL5	4	74862927	0.273922	0.141584	0.00891842	9.38109e-57	0.00797381
	rs149110519	T	C	6	144385777	upstream	PLAGL1	MFSD12	19	3556273	0.0526158	0.282785	0.0224513	2.23539e-36	0.00797233
	rs149007767	T	C	7	50370254	intronic	IKZF1	SH3GLB1	1	87192063	0.149708	0.176869	0.0114229	4.46313e-54	0.00796432
	rs149007767	T	C	7	50370254	intronic	IKZF1	RP11-523O18.5	10	50186522	0.149708	-0.17684	0.0318924	2.94122e-08	0.00796166
	rs6592965	A	G	7	50427982	intronic	IKZF1	TFDP1	13	114267399	0.449532	0.12677	0.00795901	4.05757e-57	0.00795349
	rs149007767	T	C	7	50370254	intronic	IKZF1	FCGR1A	1	149759150	0.149708	-0.176647	0.027223	8.64653e-11	0.00794434
	rs55908509	A	G	19	16442019	intergenic	KLF2;EPS15L1	FGFBP2	4	15966399	0.3284	-0.134186	0.0099528	1.99081e-41	0.00794248
	rs11604127	T	C	11	196944	UTR5	ODF3	FHL1	X	135261538	0.211394	0.154289	0.0188635	2.85735e-16	0.0079369
	rs149007767	T	C	7	50370254	intronic	IKZF1	RP11-830F9.6	16	89012064	0.149708	-0.176528	0.0299677	3.84796e-09	0.0079336
	rs1434282	C	T	1	199010721	ncRNA_exonic	LINC01221	RP11-498E2.9	9	125134994	0.288638	0.138589	0.0209548	3.74831e-11	0.00788732
	rs10822184	C	T	10	65337153	intronic	REEP3	ITGB3	17	45376435	0.511758	0.125596	0.0117981	1.82999e-26	0.00788287
	rs1354034	T	C	3	56849749	intronic	ARHGEF3	SPINT2	19	38758964	0.381863	-0.129145	0.00814427	1.25559e-56	0.00787362
	rs34706883	C	A	6	27805255	downstream	H2AC15	TRAV29DV5	14	22631450	0.0838373	0.22633	0.0342613	3.94843e-11	0.00786911
	rs149110519	T	C	6	144385777	upstream	PLAGL1	AC009506.1	2	160472700	0.0526158	-0.280924	0.046553	1.59456e-09	0.00786774
	rs13062095	C	T	3	101267385	intergenic	FAM172BP;TRMT10C	AC007228.11	19	57067857	0.350092	0.131385	0.0199065	4.10881e-11	0.00785517
	rs11602954	A	G	11	202856	downstream	BET1L	ESAM	11	124627106	0.211758	0.153283	0.0107129	1.94482e-46	0.00784364
	rs1354034	T	C	3	56849749	intronic	ARHGEF3	TPM1	15	63349472	0.381863	-0.128662	0.00817216	7.56349e-56	0.00781485
	rs8073060	A	T	17	33875262	exonic	SLFN14	C7orf41	7	30188402	0.305723	0.135605	0.00946127	1.36898e-46	0.0078062
	rs56388170	T	G	7	28724374	intronic	CREB5	AC009506.1	2	160472700	0.289189	0.137789	0.0209438	4.73623e-11	0.00780542
	rs10512472	C	T	17	33884804	exonic	SLFN14	RP11-175B9.2	1	202408304	0.179037	0.162941	0.021794	7.63862e-14	0.00780471
	rs13289095	T	G	9	131466489	intronic	PKN3	BPI	20	36927229	0.119513	0.192502	0.012842	8.52248e-51	0.00779902
	rs653178	T	C	12	112007756	intronic	ATXN2	GBP2	1	89593977	0.539991	-0.125292	0.00838324	1.66386e-50	0.00779889
	rs2523590	C	T	6	31327064	intergenic	HLA-B;MICA-AS1	XRCC6	22	42038583	0.286081	0.138081	0.0103794	2.21473e-40	0.00778815
	rs2834188	A	G	21	34689253	intergenic	IL10RB;IFNAR1	IFI27	14	94577107	0.278914	-0.139117	0.00886964	1.92774e-55	0.00778477
	rs13289095	T	G	9	131466489	intronic	PKN3	CD24P4	Y	21154474	0.119513	0.192227	0.0292752	5.16155e-11	0.00777671
	rs6763931	A	G	3	141102833	intronic	ZBTB38	SPDYC	11	64939170	0.434026	-0.125753	0.00871206	3.14369e-47	0.00776929
	rs8026803	C	T	15	80260014	exonic	BCL2A1	DUSP5	10	112264449	0.247924	-0.144314	0.00916393	7.0888e-56	0.00776649
	rs149110519	T	C	6	144385777	upstream	PLAGL1	FCHO1	19	17878952	0.0526158	0.278961	0.0306624	9.21801e-20	0.00775815
	rs1265097	A	C	6	31106459	exonic	PSORS1C1	TRAV22	14	22539145	0.114514	0.195482	0.0319101	9.01158e-10	0.00774965
	rs149007767	T	C	7	50370254	intronic	IKZF1	MICALCL	11	12339159	0.149708	-0.1744	0.0113834	5.57867e-53	0.00774346
	rs7785014	T	C	7	137881690	intergenic	MIR4468;TRIM24	SULT1B1	4	70623122	0.331668	-0.13211	0.0084698	7.53461e-55	0.00773746
	rs9399137	C	T	6	135419018	intergenic	HBS1L;MYB	PIM1	6	37140590	0.264393	-0.141021	0.00901981	4.23123e-55	0.0077356
	rs1354034	T	C	3	56849749	intronic	ARHGEF3	PDE3A	12	20679747	0.381863	-0.127915	0.00826564	5.07772e-54	0.0077244
	rs1015166	T	C	6	32798731	intronic	TAP2	TRAV41	14	22788871	0.342814	0.130875	0.0214083	9.75917e-10	0.00771779
	rs56330463	T	C	5	148200011	intergenic	HTR4;ADRB2	HIF1A	14	62188603	0.417903	0.125883	0.00803783	2.78153e-55	0.00770963
	rs6592965	A	G	7	50427982	intronic	IKZF1	SHARPIN	8	145158281	0.449532	0.124672	0.00798203	5.39619e-55	0.0076924
	rs4151657	C	T	6	31917540	intronic	CFB	TRBV5-1	7	142020929	0.355081	-0.129528	0.0212347	1.06201e-09	0.00768401
	rs149110519	T	C	6	144385777	upstream	PLAGL1	C19orf38	19	10963858	0.0526158	0.277591	0.0255797	1.95109e-27	0.00768217
	rs1799945	G	C	6	26091179	exonic	HFE	ALAS2	X	55046492	0.140095	-0.178477	0.0211722	3.46256e-17	0.00767481
	rs56388170	T	G	7	28724374	intronic	CREB5	RP11-67C2.2	10	45944293	0.289189	-0.136382	0.0209455	7.45032e-11	0.00764682
	rs149007767	T	C	7	50370254	intronic	IKZF1	SGK1	6	134564817	0.149708	0.173226	0.0124861	9.16912e-44	0.00763953
	rs1354034	T	C	3	56849749	intronic	ARHGEF3	PVALB	22	37206125	0.381863	-0.1272	0.01214	1.09256e-25	0.00763835
	rs3811444	T	C	1	248039451	exonic	TRIM58	OR51AB1P	11	5313300	0.337611	0.130598	0.0226132	7.68161e-09	0.00762841
	rs10820606	C	A	9	99192919	intergenic	ZNF367;HABP4	SAMD14	17	48197325	0.236914	0.145212	0.0102427	1.26987e-45	0.00762424
	rs11602954	A	G	11	202856	downstream	BET1L	PTCRA	6	42888650	0.211758	0.151064	0.0107142	3.8247e-45	0.00761822
	rs1270942	G	A	6	31918860	intronic	CFB	TRBV7-3	7	142247362	0.103857	0.202287	0.0333098	1.25621e-09	0.0076169
	rs141094656	C	T	1	92753336	intronic	GLMN	CYP1B1	2	38315580	0.0195137	0.446084	0.0346271	5.64761e-38	0.00761455
	rs4917014	G	T	7	50305863	intergenic	SPATA48;IKZF1	PHEX	X	22159993	0.316454	-0.132664	0.0158007	4.61553e-17	0.00761403
	rs7950726	A	C	11	5225447	intergenic	OR51V1;HBB	HDAC1	1	32778461	0.130877	0.18292	0.0128038	2.66009e-46	0.007612
	rs3132468	C	T	6	31475486	intronic	MICB	TRAV12-2	14	22356359	0.257991	-0.140859	0.0185019	2.67392e-14	0.00759648
	rs149007767	T	C	7	50370254	intronic	IKZF1	APH1B	15	63584771	0.149708	0.172701	0.0113843	5.57918e-52	0.00759333
	rs56330463	T	C	5	148200011	intergenic	HTR4;ADRB2	PDE4B	1	66549228	0.417903	0.124905	0.00806569	4.31304e-54	0.00759037
	rs11602954	A	G	11	202856	downstream	BET1L	RAB27B	18	52473919	0.211758	0.15073	0.0107349	8.73463e-45	0.00758449
	rs4713555	T	G	6	32575524	intergenic	HLA-DRB1;HLA-DQA1	TRAV20	14	22509119	0.265418	-0.139411	0.0106366	3.01431e-39	0.00757874
	rs13062095	C	T	3	101267385	intergenic	FAM172BP;TRMT10C	ENSG00000226686	19	37749625	0.350092	0.12901	0.0224193	8.69501e-09	0.00757371
	rs3021304	C	G	6	32575658	intergenic	HLA-DRB1;HLA-DQA1	TRAV26-2	14	22670869	0.502148	-0.123055	0.0215	1.04352e-08	0.00757113
	rs56388170	T	G	7	28724374	intronic	CREB5	RP11-455F5.3	16	30111594	0.289189	0.135553	0.0209464	9.7099e-11	0.0075541
	rs1165205	T	A	6	25870542	intronic	SLC17A3	HNRNPCP7	7	63961655	0.474087	-0.123036	0.0218493	1.79064e-08	0.00754856
	rs477515	A	G	6	32569691	intergenic	HLA-DRB1;HLA-DQA1	SSRP1	11	57098405	0.265286	-0.139143	0.00908896	6.65797e-53	0.00754718
	rs41266839	C	G	6	26409890	exonic	BTN3A1	TRAV12-2	14	22356359	0.0792497	0.227402	0.0351569	9.91772e-11	0.00754669
	rs1354034	T	C	3	56849749	intronic	ARHGEF3	VEPH1	3	157114469	0.381863	-0.126401	0.00814563	2.63321e-54	0.00754269
	rs149110519	T	C	6	144385777	upstream	PLAGL1	RGL3	19	11512517	0.0526158	0.275053	0.0425015	9.69705e-11	0.00754232
	rs149007767	T	C	7	50370254	intronic	IKZF1	KIAA1211L	2	99481515	0.149708	-0.172	0.0127797	2.72949e-41	0.00753185
	rs592423	A	C	6	139840693	intergenic	LINC01625;FILNC1	SMOX	20	4135010	0.467953	-0.122931	0.00797288	1.22546e-53	0.00752503
	rs10820606	C	A	9	99192919	intergenic	ZNF367;HABP4	SMIM5	17	73633499	0.236914	-0.144233	0.0117582	1.36881e-34	0.00752179
	rs13217619	C	T	6	28306671	intronic	ZSCAN31	TRBV2	7	142001001	0.0881228	0.21623	0.0335023	1.08792e-10	0.0075143
	rs149007767	T	C	7	50370254	intronic	IKZF1	BHLHE40	3	5023904	0.149708	-0.171757	0.0113848	1.98406e-51	0.00751059
	rs2596500	C	A	6	31321267	downstream	HLA-B	TRAV35	14	22690081	0.110278	0.195603	0.0324437	1.64977e-09	0.007508
	rs4502545	A	G	3	28303030	intronic	CMC1	ZNF683	1	26694569	0.179583	-0.159615	0.0103292	7.23483e-54	0.00750715
	rs149110519	T	C	6	144385777	upstream	PLAGL1	TRIM8	10	104411164	0.0526158	-0.27441	0.0199609	5.27929e-43	0.00750709
	rs8073060	A	T	17	33875262	exonic	SLFN14	GNA12	7	2825852	0.305723	0.132954	0.00866413	3.80209e-53	0.00750407
	rs10512472	C	T	17	33884804	exonic	SLFN14	BAG6	6	31613643	0.179037	0.159757	0.0191693	7.81559e-17	0.00750266
	rs826415	G	T	1	118153977	intronic	TENT5C	TREML1	6	41119577	0.308498	0.132591	0.00858414	8.02729e-54	0.00750069
	rs429150	T	C	6	32075563	intronic	TNXB	RP11-291B21.2	12	10708305	0.478581	-0.122582	0.0203438	1.68588e-09	0.00749935
	rs8073060	A	T	17	33875262	exonic	SLFN14	ITGA2B	17	42458210	0.305723	0.132912	0.00868845	7.93284e-53	0.00749933
	rs1354034	T	C	3	56849749	intronic	ARHGEF3	LMNA	1	156081122	0.381863	-0.126019	0.00814582	5.49645e-54	0.00749713
	rs56388170	T	G	7	28724374	intronic	CREB5	IL8	4	74607828	0.289189	0.135023	0.00976511	1.74932e-43	0.00749519
	rs149007767	T	C	7	50370254	intronic	IKZF1	RP11-701P16.4	4	185817816	0.149708	-0.17157	0.0299744	1.04106e-08	0.00749424
	rs149007767	T	C	7	50370254	intronic	IKZF1	SSH2	17	28105125	0.149708	0.171431	0.0172509	2.85912e-23	0.00748206
	rs3896594	G	T	2	8762414	intergenic	LINC01814;ID2-AS1	ST6GALNAC4	9	130674741	0.377086	0.126181	0.00818069	1.12367e-53	0.00747979
	rs2523608	G	A	6	31322559	intronic	HLA-B	TRBV6-5	7	142180765	0.394018	0.125088	0.020798	1.80554e-09	0.00747195
	rs7310615	G	C	12	111865049	intronic	SH2B3	S100A10	1	151961128	0.537476	0.122566	0.00841308	4.45567e-48	0.00746901
	rs6592965	A	G	7	50427982	intronic	IKZF1	HAGH	16	1861408	0.449532	0.122829	0.00798294	2.0196e-53	0.00746659
	rs8073060	A	T	17	33875262	exonic	SLFN14	RPS12	6	133137141	0.305723	0.132613	0.0190821	3.66323e-12	0.00746556
	rs592423	A	C	6	139840693	intergenic	LINC01625;FILNC1	HBM	16	210329	0.467953	0.122386	0.00803723	2.32662e-52	0.00745841
	rs826415	G	T	1	118153977	intronic	TENT5C	TGFB1I1	16	31486093	0.308498	0.132205	0.00861357	3.62471e-53	0.00745717
	rs1354034	T	C	3	56849749	intronic	ARHGEF3	MEIS1	2	66730792	0.381863	0.125489	0.00815122	1.76551e-53	0.00743418
	rs1354034	T	C	3	56849749	intronic	ARHGEF3	44987	19	8491027	0.381863	-0.125296	0.00814617	2.19531e-53	0.00741137
	rs149007767	T	C	7	50370254	intronic	IKZF1	WDFY4	10	50041961	0.149708	-0.170421	0.012592	9.85139e-42	0.00739415
	rs149110519	T	C	6	144385777	upstream	PLAGL1	IL8	4	74607828	0.0526158	-0.272168	0.022483	9.87657e-34	0.00738493
	rs6600233	T	C	16	143503	intronic	NPRL3	TUBBP5	9	141058193	0.435703	-0.122393	0.0148224	1.49005e-16	0.00736621
	rs6084653	G	C	20	4157072	intronic	SMOX	YBX1	1	43158059	0.36636	-0.125957	0.0182475	5.10233e-12	0.00736588
	rs9271640	T	C	6	32592200	intergenic	HLA-DRB1;HLA-DQA1	TRAV20	14	22509119	0.221621	-0.146067	0.0119156	1.51461e-34	0.00736095
	rs10512472	C	T	17	33884804	exonic	SLFN14	CLEC1B	12	10152132	0.179037	-0.158221	0.0103235	5.10234e-53	0.00735914
	rs149007767	T	C	7	50370254	intronic	IKZF1	FLOT2	17	27215525	0.149708	-0.169964	0.0113857	2.16993e-50	0.00735457
	rs10761741	T	G	10	65066186	intronic	JMJD1C	ITGA2B	17	42458210	0.420816	0.122786	0.00804416	1.32849e-52	0.00734914
	rs1427407	T	G	2	60718043	intronic	BCL11A	VWCE	11	61044329	0.157026	-0.16635	0.0109452	3.61811e-52	0.00732595
	rs8073060	A	T	17	33875262	exonic	SLFN14	GUCD1	22	24944154	0.305723	0.131319	0.00963466	2.65944e-42	0.00732064
	rs149007767	T	C	7	50370254	intronic	IKZF1	MPZL1	1	167725792	0.149708	0.16948	0.0114266	9.09813e-50	0.00731271
	rs6986779	T	C	8	142337790	intergenic	SLC45A4;LINC01300	AMD1	6	111206444	0.349935	-0.126705	0.00935291	8.24226e-42	0.00730399
	rs4917014	G	T	7	50305863	intergenic	SPATA48;IKZF1	MX1	21	42811686	0.316454	-0.129924	0.00856214	5.24129e-52	0.00730271
	rs12619285	G	A	2	213824045	intergenic	MIR4776-1;IKZF2	ENSG00000189253	11	89605817	0.273836	-0.135504	0.0219856	7.12443e-10	0.00730226
	rs1354034	T	C	3	56849749	intronic	ARHGEF3	NCKAP1	2	183846595	0.381863	-0.124355	0.00817428	2.89946e-52	0.00730047
	rs149007767	T	C	7	50370254	intronic	IKZF1	GALNT3	2	166627646	0.149708	0.169256	0.0172525	1.01465e-22	0.00729343
	rs1354034	T	C	3	56849749	intronic	ARHGEF3	DAAM1	14	59746743	0.381863	-0.124273	0.00815181	1.78278e-52	0.00729078
	rs1354034	T	C	3	56849749	intronic	ARHGEF3	IGF2BP3	7	23429957	0.381863	-0.124034	0.0135249	4.69521e-20	0.00726277
	rs6592965	A	G	7	50427982	intronic	IKZF1	LYL1	19	13211911	0.449532	0.121098	0.0118591	1.76302e-24	0.00725765
	rs149007767	T	C	7	50370254	intronic	IKZF1	CD33	19	51737717	0.149708	-0.16879	0.0113862	1.02495e-49	0.00725329
	rs11602954	A	G	11	202856	downstream	BET1L	SH3BGRL2	6	80377186	0.211758	0.147394	0.0106721	2.1847e-43	0.00725251
	rs1354034	T	C	3	56849749	intronic	ARHGEF3	PSD3	8	18663525	0.381863	-0.123874	0.00814686	3.27131e-52	0.00724404
	rs1532331	G	T	5	43116830	intergenic	LOC100506639;ZNF131	HAUS5	19	36109948	0.316115	-0.129352	0.00936218	2.02688e-43	0.00723449
	rs149007767	T	C	7	50370254	intronic	IKZF1	LILRA3	19	54804903	0.149708	-0.168482	0.0141575	1.1764e-32	0.00722685
	rs1142287	T	C	1	155230131	exonic	SCAMP3	HIST1H3H	6	27778078	0.253918	-0.138105	0.00914951	1.76552e-51	0.00722656
	rs2596500	C	A	6	31321267	downstream	HLA-B	RP11-291B21.2	12	10708305	0.110278	-0.191867	0.0324483	3.35932e-09	0.00722393
	rs2746427	T	A	6	135669097	intronic	AHI1	TRAV8-3	14	22320959	0.451719	-0.120761	0.019086	2.4965e-10	0.0072236
	rs56388170	T	G	7	28724374	intronic	CREB5	KIAA0319	6	24595357	0.289189	-0.132551	0.00877585	1.5217e-51	0.00722328
	rs4917014	G	T	7	50305863	intergenic	SPATA48;IKZF1	IFIT1	10	91158024	0.316454	-0.129076	0.00856254	2.38313e-51	0.00720775
	rs149007767	T	C	7	50370254	intronic	IKZF1	ENSG00000231813	1	161607828	0.149708	0.168199	0.0299788	2.01626e-08	0.0072026
	rs2523608	G	A	6	31322559	intronic	HLA-B	TRAV19	14	22476085	0.394018	0.122796	0.0208009	3.56085e-09	0.00720066
	rs73660574	A	G	9	135860412	intronic	GFI1B	ITLN1	1	160850644	0.0342189	0.329963	0.03615	7.00346e-20	0.00719624
	rs35979828	T	C	12	54685880	downstream	NFE2	KIAA0319	6	24595357	0.0571059	-0.258474	0.0175782	6.05826e-49	0.00719459
	rs597808	G	A	12	111973358	intronic	ATXN2	CTA-250D10.23	22	42318565	0.52377	0.120089	0.0190186	2.71387e-10	0.00719439
	rs4963128	T	C	11	589564	intronic	PHRF1	ENSG00000221843	2	27802488	0.310596	-0.129562	0.00935197	1.20321e-43	0.0071888
	rs12589699	G	A	14	69212885	intergenic	RAD51B;ZFP36L1	CDKN1A	6	36649710	0.127908	-0.179446	0.0118514	8.6487e-52	0.00718382
	rs3132468	C	T	6	31475486	intronic	MICB	TRAV17	14	22466092	0.257991	0.136899	0.0185059	1.38668e-13	0.00717536
	rs10512472	C	T	17	33884804	exonic	SLFN14	NT5M	17	17228813	0.179037	0.156051	0.0103246	1.29954e-51	0.00715859
	rs11602954	A	G	11	202856	downstream	BET1L	RBPMS2	15	65049938	0.211758	0.146388	0.0106727	8.12115e-43	0.0071539
	rs7210990	A	C	17	16170764	intronic	PIGL	RP11-290F20.3	20	48890177	0.481977	0.119665	0.0190099	3.07598e-10	0.00715057
	rs8887	T	C	19	4502201	UTR3	HDGFL2	RP11-317J10.2	8	86365612	0.460179	0.119942	0.0190581	3.10387e-10	0.00714741
	rs35033748	C	T	17	27179590	intergenic	FAM222B;ERAL1	IFIT1B	10	91141387	0.215702	-0.145143	0.0114844	1.29831e-36	0.00712788
	rs35979828	T	C	12	54685880	downstream	NFE2	TDP2	6	24658733	0.0571059	-0.257174	0.0175907	2.09708e-48	0.0071224
	rs10423726	C	A	19	16444697	intergenic	KLF2;EPS15L1	ITGB7	12	53593096	0.404467	0.121564	0.0119238	2.0853e-24	0.00711921
	rs13098914	C	T	3	56834799	intronic	ARHGEF3	ITGB3	17	45376435	0.419822	-0.120873	0.0151135	1.26765e-15	0.00711733
	rs145171343	T	C	17	33886764	UTR5	SLFN14	CTDSPL	3	37964705	0.0138172	0.511013	0.0417975	2.26064e-34	0.00711657
	rs4713555	T	G	6	32575524	intergenic	HLA-DRB1;HLA-DQA1	TRAV14DV4	14	22392533	0.265418	-0.135053	0.0215124	3.43177e-10	0.00711227
	rs3132468	C	T	6	31475486	intronic	MICB	TRBV30	7	142510677	0.257991	0.136259	0.0232318	4.48592e-09	0.00710844
	rs10512472	C	T	17	33884804	exonic	SLFN14	ENSG00000175746	15	39544965	0.179037	-0.155413	0.0104491	4.91307e-50	0.00710019
	rs3896594	G	T	2	8762414	intergenic	LINC01814;ID2-AS1	GRINA	8	145065904	0.377086	0.122926	0.012173	5.62654e-24	0.00709877
	rs149110519	T	C	6	144385777	upstream	PLAGL1	PGLYRP1	19	46524367	0.0526158	0.2668	0.0196723	6.70931e-42	0.00709648
	rs73660574	A	G	9	135860412	intronic	GFI1B	YBX1	1	43158059	0.0342189	0.327595	0.0483764	1.2719e-11	0.00709332
	rs1990760	C	T	2	163124051	exonic	IFIH1	MX1	21	42811686	0.396134	-0.121756	0.00852853	3.075e-46	0.00709239
	rs149007767	T	C	7	50370254	intronic	IKZF1	HRH2	5	175099139	0.149708	-0.166898	0.0113872	1.22063e-48	0.00709165
	rs505404	G	T	11	243268	intronic	PSMD13	F13A1	6	6232782	0.222031	0.143261	0.00954161	5.91834e-51	0.00709021
	rs56330463	T	C	5	148200011	intergenic	HTR4;ADRB2	LINC00694	3	44464059	0.417903	0.120376	0.0192599	4.1019e-10	0.00704986
	rs56388170	T	G	7	28724374	intronic	CREB5	GPR162	12	6933648	0.289189	0.130925	0.00877663	2.53978e-50	0.00704706
	rs149007767	T	C	7	50370254	intronic	IKZF1	CCDC149	4	24894782	0.149708	-0.166344	0.0113874	2.50844e-48	0.00704464
	rs55834529	G	A	6	27072542	intergenic	LINC00240;H2BC11	TRAV12-2	14	22356359	0.0805697	0.217995	0.0349016	4.21097e-10	0.00704068
	rs1354034	T	C	3	56849749	intronic	ARHGEF3	CLDN5	22	19512807	0.381863	-0.122122	0.00814769	8.71714e-51	0.00704066
	rs1375493	G	A	2	182323766	intronic	ITGA4	ALDH2	12	112226236	0.434923	-0.119593	0.0079995	1.55515e-50	0.00703013
	rs149110519	T	C	6	144385777	upstream	PLAGL1	PIM2	X	48773380	0.0526158	0.265537	0.0425125	4.20828e-10	0.00702949
	rs56388170	T	G	7	28724374	intronic	CREB5	RNF185	22	31579583	0.289189	-0.13076	0.0144948	1.8604e-19	0.0070294
	rs149007767	T	C	7	50370254	intronic	IKZF1	AC004069.2	4	106060106	0.149708	0.166071	0.0299815	3.0403e-08	0.00702148
	rs4065275	A	G	17	38080865	intronic	ORMDL3	DGKK	X	50161072	0.483524	0.118546	0.0175962	1.6169e-11	0.00701894
	rs11066301	G	A	12	112871372	intronic	PTPN11	FCGR1A	1	149759150	0.400736	0.120877	0.0179439	1.62359e-11	0.0070177
	rs6592965	A	G	7	50427982	intronic	IKZF1	OSBP2	22	31196790	0.449532	0.119026	0.00795776	1.39785e-50	0.0070114
	rs1800562	A	G	6	26093141	exonic	HFE	ALAS2	X	55046492	0.0499676	-0.271731	0.0337391	8.01967e-16	0.00701029
	rs10512472	C	T	17	33884804	exonic	SLFN14	ENSG00000263293	17	45390905	0.179037	0.154422	0.0275051	1.9736e-08	0.00700995
	rs947474	G	A	10	6390450	intergenic	LINC02649;LINC02656	ENSG00000250461	5	60671310	0.192011	0.150256	0.0261583	9.24112e-09	0.00700525
	rs8073060	A	T	17	33875262	exonic	SLFN14	SLC25A39	17	42399615	0.305723	0.128434	0.00869063	2.01606e-49	0.00700251
	rs55834529	G	A	6	27072542	intergenic	LINC00240;H2BC11	TRBV2	7	142001001	0.0805697	0.217337	0.0349023	4.75451e-10	0.00699821
	rs6592965	A	G	7	50427982	intronic	IKZF1	HPS1	10	100191319	0.449532	0.118907	0.00798483	3.73718e-50	0.00699739
	rs13289095	T	G	9	131466489	intronic	PKN3	AC011513.4	19	42276303	0.119513	0.182281	0.0292868	4.84637e-10	0.00699278
	rs505404	G	T	11	243268	intronic	PSMD13	ITGA2B	17	42458210	0.222031	0.142216	0.00957461	6.61279e-50	0.00698715
	rs28383314	T	C	6	32587213	intergenic	HLA-DRB1;HLA-DQA1	TRAV8-3	14	22320959	0.383654	0.121509	0.0221131	3.90932e-08	0.00698256
	rs149007767	T	C	7	50370254	intronic	IKZF1	NOTCH2	1	120533208	0.149708	0.165607	0.0114285	1.38722e-47	0.00698236
	rs149110519	T	C	6	144385777	upstream	PLAGL1	TNK2	3	195614525	0.0526158	0.264576	0.0219573	1.94893e-33	0.00697868
	rs13062095	C	T	3	101267385	intergenic	FAM172BP;TRMT10C	FAAH2	X	57414384	0.350092	0.123786	0.0154113	9.57401e-16	0.00697283
	rs145171343	T	C	17	33886764	UTR5	SLFN14	VWF	12	6145988	0.0138172	0.505401	0.0418008	1.18275e-33	0.00696113
	rs3132468	C	T	6	31475486	intronic	MICB	TRAV26-2	14	22670869	0.257991	0.134736	0.0232336	6.6632e-09	0.00695046
	rs6592965	A	G	7	50427982	intronic	IKZF1	OPTN	10	13160878	0.449532	-0.118482	0.00795802	3.92039e-50	0.0069475
	rs35033748	C	T	17	27179590	intergenic	FAM222B;ERAL1	ODC1	2	10584362	0.215702	-0.143248	0.0103641	1.89088e-43	0.00694289
	rs17696736	G	A	12	112486818	intronic	NAA25	FCGR1A	1	149759150	0.408694	0.11982	0.0178882	2.10858e-11	0.00693909
	rs826415	G	T	1	118153977	intronic	TENT5C	PPBP	4	74853334	0.308498	0.127506	0.00858658	7.01941e-50	0.0069364
	rs9373124	C	T	6	135423209	intergenic	HBS1L;MYB	CTSE	1	206324781	0.278635	0.131271	0.0163972	1.18789e-15	0.00692722
	rs149110519	T	C	6	144385777	upstream	PLAGL1	PTPLAD2	9	21013470	0.0526158	0.263469	0.0425149	5.7513e-10	0.00692039
	rs2950393	A	G	12	57036023	intronic	ATP5F1B	SPOCD1	1	32268837	0.317506	0.126279	0.00851968	1.05593e-49	0.006911
	rs6592965	A	G	7	50427982	intronic	IKZF1	FAXDC2	5	154218431	0.449532	-0.118148	0.00868398	3.72437e-42	0.00690839
	rs597808	G	A	12	111973358	intronic	ATXN2	FCGR1C	1	149349403	0.52377	-0.117598	0.0176077	2.40907e-11	0.00689902
	rs505404	G	T	11	243268	intronic	PSMD13	CTDSPL	3	37964705	0.222031	0.14112	0.00954262	1.74042e-49	0.00687992
	rs1354034	T	C	3	56849749	intronic	ARHGEF3	CDKN2D	19	10678436	0.381863	-0.120676	0.00814837	1.26616e-49	0.00687484
	rs114694170	C	T	5	88180196	ncRNA_intronic	MEF2C-AS1	RP11-152L20.3	15	92783124	0.0523176	0.263145	0.0462754	1.29669e-08	0.00686642
	rs1375493	G	A	2	182323766	intronic	ITGA4	MS4A6A	11	59945610	0.434923	-0.118149	0.0080968	3.15339e-48	0.0068614
	rs9420589	T	G	10	94450233	intronic	HHEX	SPON2	4	1181735	0.428682	0.118303	0.0080249	3.46373e-49	0.00685544
	rs80130819	C	A	12	48419618	intergenic	COL2A1;SENP1	NFE4	7	102621636	0.0831226	0.211766	0.0344128	7.56958e-10	0.00683555
	rs149007767	T	C	7	50370254	intronic	IKZF1	PLBD1	12	14688939	0.149708	-0.163704	0.012545	6.4134e-39	0.00682275
	rs149110519	T	C	6	144385777	upstream	PLAGL1	RP11-456P18.2	1	161861304	0.0526158	-0.261561	0.0465776	1.95881e-08	0.00682053
	rs1354034	T	C	3	56849749	intronic	ARHGEF3	TRBV7-5	7	142157613	0.381863	-0.120183	0.0220195	4.81528e-08	0.00681877
	rs8887	T	C	19	4502201	UTR3	HDGFL2	RP5-1154L15.2	12	695341	0.460179	0.117143	0.0190612	7.96618e-10	0.00681769
	rs35033748	C	T	17	27179590	intergenic	FAM222B;ERAL1	MAP2K3	17	21203268	0.215702	-0.141785	0.0104057	2.81696e-42	0.0068018
	rs185819	T	C	6	32050067	exonic	TNXB	XRCC6	22	42038583	0.462628	-0.116774	0.00941261	2.42164e-35	0.00677996
	rs1354034	T	C	3	56849749	intronic	ARHGEF3	LAMTOR1	11	71805687	0.381863	-0.119758	0.00904965	5.62077e-40	0.00677072
	rs505404	G	T	11	243268	intronic	PSMD13	CMTM5	14	23847499	0.222031	0.139959	0.00954316	1.06594e-48	0.00676718
	rs41266839	C	G	6	26409890	exonic	BTN3A1	TRBV2	7	142001001	0.0792497	0.215273	0.0351707	9.31067e-10	0.00676314
	rs34856868	A	G	1	92554283	exonic	BTBD8	C11orf82	11	82640168	0.0245314	0.375545	0.0324302	5.19854e-31	0.00674979
	rs35033748	C	T	17	27179590	intergenic	FAM222B;ERAL1	MKRN1	7	140166104	0.215702	-0.141237	0.0167079	2.83183e-17	0.00674933
	rs10820606	C	A	9	99192919	intergenic	ZNF367;HABP4	NCOA4	10	51577921	0.236914	-0.136593	0.0102472	1.55313e-40	0.00674611
	rs1354034	T	C	3	56849749	intronic	ARHGEF3	YWHAH	22	32347018	0.381863	-0.119464	0.00814894	1.16102e-48	0.00673749
	rs11239550	G	A	10	46024729	intronic	MARCHF8	ALAS2	X	55046492	0.319847	-0.124397	0.0157628	2.97859e-15	0.00673282
	rs2227901	A	G	4	57798189	exonic	REST	ATL1	14	51049506	0.203258	0.144134	0.0107789	8.8376e-41	0.00672862
	rs11553699	G	A	12	122216910	UTR3	RHOF;TMEM120B	ITGB3	17	45376435	0.10963	0.185575	0.0194582	1.46882e-21	0.00672308
	rs144447022	T	G	6	29244219	ncRNA_intronic	LOC101929006	TRAV12-2	14	22356359	0.0857645	0.207053	0.0305289	1.18359e-11	0.00672292
	rs13062095	C	T	3	101267385	intergenic	FAM172BP;TRMT10C	TAF7	5	140699193	0.350092	0.12148	0.00831523	2.45023e-48	0.0067154
	rs141094656	C	T	1	92753336	intronic	GLMN	CDC42BPB	14	103461257	0.0195137	-0.418791	0.0346429	1.21042e-33	0.00671128
	rs8887	T	C	19	4502201	UTR3	HDGFL2	CTC-756D1.3	8	23351116	0.460179	0.116209	0.0190623	1.08552e-09	0.00670947
	rs3132468	C	T	6	31475486	intronic	MICB	TRBV6-1	7	142028365	0.257991	0.132332	0.0232365	1.23372e-08	0.00670459
	rs10740118	C	G	10	65101207	intronic	JMJD1C	SPOCD1	1	32268837	0.421529	-0.117015	0.0080324	4.49497e-48	0.00667764
	rs35979828	T	C	12	54685880	downstream	NFE2	CMTM2	16	66617764	0.0571059	-0.248843	0.0175829	1.79978e-45	0.00666847
	rs73396800	C	G	6	32914726	intergenic	HLA-DMB;HLA-DMA	TRAV13-1	14	22337283	0.0724388	-0.222757	0.0392219	1.35168e-08	0.00666816
	rs13217619	C	T	6	28306671	intronic	ZSCAN31	TRAV12-2	14	22356359	0.0881228	0.203643	0.0273397	9.43359e-14	0.00666488
	rs149007767	T	C	7	50370254	intronic	IKZF1	BCORL1	X	129153570	0.149708	0.161788	0.0220498	2.17783e-13	0.00666401
	rs10820606	C	A	9	99192919	intergenic	ZNF367;HABP4	TSC22D1	13	45079469	0.236914	-0.135756	0.0104058	6.67969e-39	0.00666361
	rs6601450	T	G	8	10243101	intronic	MSRA	TNK2-AS1	3	195636537	0.452911	-0.115957	0.019087	1.23833e-09	0.00666342
	rs56330463	T	C	5	148200011	intergenic	HTR4;ADRB2	UBE2J1	6	90049455	0.417903	-0.116911	0.00804212	7.0209e-48	0.0066499
	rs1354034	T	C	3	56849749	intronic	ARHGEF3	RP11-879F14.2	18	59263564	0.381863	-0.118661	0.011041	6.10217e-27	0.00664716
	rs149110519	T	C	6	144385777	upstream	PLAGL1	CDK5R1	17	30815955	0.0526158	0.257915	0.0196769	2.98269e-39	0.00663171
	rs913678	C	T	20	48955424	intergenic	LINC01271;PTPN1	MS4A7	11	60154689	0.306921	-0.124843	0.00863701	2.3517e-47	0.00663081
	rs1354034	T	C	3	56849749	intronic	ARHGEF3	RDH11	14	68153024	0.381863	-0.118476	0.00815454	7.96027e-48	0.00662645
	rs12614	T	C	6	31914179	exonic	CFB	TRAV22	14	22539145	0.103377	0.189054	0.0333947	1.50318e-08	0.00662577
	rs10512472	C	T	17	33884804	exonic	SLFN14	RP11-930O11.1	14	56794658	0.179037	0.150073	0.0177414	2.69911e-17	0.00662065
	rs114694170	C	T	5	88180196	ncRNA_intronic	MEF2C-AS1	RP11-498E2.9	9	125134994	0.0523176	0.258249	0.0462813	2.40519e-08	0.00661332
	rs28798705	G	A	6	32617809	intergenic	HLA-DQA1;HLA-DQB1	SSRP1	11	57098405	0.344011	0.121047	0.0112508	5.38086e-27	0.00661309
	rs6084653	G	C	20	4157072	intronic	SMOX	SLC6A9	1	44477155	0.36636	0.119334	0.00823263	1.29734e-47	0.00661169
	rs8073060	A	T	17	33875262	exonic	SLFN14	EPB42	15	43455952	0.305723	0.124785	0.00866247	4.79232e-47	0.00661026
	rs141094656	C	T	1	92753336	intronic	GLMN	ALDH1A1	9	75605468	0.0195137	0.41557	0.0346447	3.76507e-33	0.00660844
	rs13198474	A	G	6	25874423	UTR5	SLC17A3	TRBV5-1	7	142020929	0.0692555	0.226262	0.0374235	1.48486e-09	0.00659994
	rs9378249	G	T	6	31327701	intergenic	HLA-B;MICA-AS1	TRBV5-6	7	142131665	0.0795323	-0.2123	0.0375772	1.60728e-08	0.00659906
	rs1354034	T	C	3	56849749	intronic	ARHGEF3	SSX2IP	1	85132938	0.381863	-0.118129	0.00814955	1.29923e-47	0.00658776
	rs660895	G	A	6	32577380	intergenic	HLA-DRB1;HLA-DQA1	TRAV36DV7	14	22694895	0.177598	0.150023	0.0248617	1.59653e-09	0.00657459
	rs505404	G	T	11	243268	intronic	PSMD13	GP1BA	17	4836958	0.222031	0.137836	0.00954414	2.81552e-47	0.00656348
	rs2143950	T	C	14	35572357	ncRNA_intronic	LOC101927178	GHRL	3	10330995	0.1592	0.156519	0.0161299	2.91044e-22	0.00655839
	rs2746427	T	A	6	135669097	intronic	AHI1	TRAV8-2	14	22315061	0.451719	-0.114861	0.0190926	1.7878e-09	0.00653503
	rs17696736	G	A	12	112486818	intronic	NAA25	STAT1	2	191857385	0.408694	0.116236	0.00811866	1.7087e-46	0.00653018
	rs3184504	C	T	12	111884608	exonic	SH2B3	RP11-196G18.3	1	149760895	0.542056	-0.114639	0.0137548	7.78264e-17	0.0065246
	rs590856	G	A	6	139844429	intergenic	LINC01625;FILNC1	VWCE	11	61044329	0.465502	0.114435	0.00795245	5.98824e-47	0.00651651
	rs3811444	T	C	1	248039451	exonic	TRIM58	BTNL10	1	228698181	0.337611	0.120638	0.0200929	1.92515e-09	0.00650916
	rs149110519	T	C	6	144385777	upstream	PLAGL1	XPO6	16	28166270	0.0526158	-0.255483	0.0196781	1.52578e-38	0.00650725
	rs114067101	G	A	6	32457960	intergenic	HLA-DRA;HLA-DRB5	TRAV20	14	22509119	0.0761224	0.214967	0.0222716	4.81592e-22	0.00649982
	rs2075995	C	A	1	23847464	exonic	E2F2	HBM	16	210329	0.488046	0.114043	0.00806209	1.98814e-45	0.0064992
	rs9376092	A	C	6	135427144	intergenic	HBS1L;MYB	HBBP1	11	5263975	0.27571	0.127552	0.0106624	5.56531e-33	0.00649782
	rs57994353	C	T	9	139356987	intronic	SEC16A	MX1	21	42811686	0.294804	-0.125006	0.00935823	1.06527e-40	0.00649737
	rs2594836	G	A	5	173205318	intergenic	LINC01484;LINC01485	RP11-452K12.3	10	99069305	0.250349	0.131537	0.0219335	2.00872e-09	0.0064943
	rs2233956	C	T	6	31081205	upstream	C6orf15	TRAV13-1	14	22337283	0.157552	-0.156353	0.0279088	2.11526e-08	0.00648951
	rs10820606	C	A	9	99192919	intergenic	ZNF367;HABP4	HGD	3	120374219	0.236914	0.133889	0.0114738	1.83353e-31	0.00648166
	rs35979828	T	C	12	54685880	downstream	NFE2	OR52K3P	11	4496583	0.0571059	-0.245263	0.0409488	2.10487e-09	0.00647796
	rs114694170	C	T	5	88180196	ncRNA_intronic	MEF2C-AS1	MYL9	20	35174057	0.0523176	0.255523	0.0182656	1.81186e-44	0.00647443
	rs55908509	A	G	19	16442019	intergenic	KLF2;EPS15L1	XPNPEP2	X	128888232	0.3284	-0.12115	0.0188543	1.3135e-10	0.00647428
	rs11602954	A	G	11	202856	downstream	BET1L	SAMD14	17	48197325	0.211758	0.139249	0.0106763	6.98441e-39	0.00647313
	rs28498283	T	A	2	43360065	intergenic	LINC02580;ZFP36L2	RP11-875O11.3	8	22930445	0.254318	-0.130509	0.0218238	2.23001e-09	0.0064601
	rs4328821	G	A	3	128316435	intergenic	LINC01565;RPN1	HDC	15	50546201	0.118714	-0.175581	0.0123395	6.03684e-46	0.00645067
	rs11602954	A	G	11	202856	downstream	BET1L	ALOX12	17	6906719	0.211758	0.138962	0.0106765	9.96251e-39	0.00644643
	rs1265564	C	A	12	111708458	intronic	CUX2	ENSG00000263463	22	42319263	0.421923	-0.114936	0.01986	7.15268e-09	0.00644404
	rs7310615	G	C	12	111865049	intronic	SH2B3	CD99	X	2634285	0.537476	0.113825	0.0190579	2.33502e-09	0.00644169
	rs10512472	C	T	17	33884804	exonic	SLFN14	SH3BGRL2	6	80377186	0.179037	0.148011	0.0103283	1.40898e-46	0.00643996
	rs56330463	T	C	5	148200011	intergenic	HTR4;ADRB2	PLAUR	19	44162473	0.417903	0.115005	0.00807039	4.46999e-46	0.00643475
	rs9915021	T	C	17	33976619	intronic	AP2B1	UBXN6	19	4451407	0.0591544	0.240334	0.0168152	2.43002e-46	0.00642934
	rs1354034	T	C	3	56849749	intronic	ARHGEF3	ADCY6	12	49171397	0.381863	-0.116692	0.0081502	1.69645e-46	0.00642844
	rs13289095	T	G	9	131466489	intronic	PKN3	RP11-34F13.2	15	68128932	0.119513	0.174741	0.0317745	3.81086e-08	0.00642623
	rs149007767	T	C	7	50370254	intronic	IKZF1	CSF1R	5	149462894	0.149708	-0.158833	0.011391	3.43653e-44	0.00642278
	rs6592965	A	G	7	50427982	intronic	IKZF1	GUCD1	22	24944154	0.449532	0.113914	0.00884011	5.39714e-38	0.00642206
	rs1541777	G	A	2	219587291	intronic	TTLL4	HIST1H1PS1	6	26195896	0.466103	0.113568	0.0199937	1.34537e-08	0.00641921
	rs10187424	C	T	2	85794297	intergenic	GGCX;VAMP8	Z95152.1	6	36108320	0.420816	0.114746	0.0209231	4.15345e-08	0.00641826
	rs149007767	T	C	7	50370254	intronic	IKZF1	GHRL	3	10330995	0.149708	-0.158725	0.0172602	3.71523e-20	0.00641405
	rs149007767	T	C	7	50370254	intronic	IKZF1	GAPT	5	57790089	0.149708	0.158673	0.0113911	4.18694e-44	0.00640988
	rs149110519	T	C	6	144385777	upstream	PLAGL1	AGPAT9	4	84492047	0.0526158	0.253528	0.0196791	5.60386e-38	0.00640803
	rs505404	G	T	11	243268	intronic	PSMD13	C6orf25	6	31690431	0.222031	0.13608	0.0142003	9.43576e-22	0.00639729
	rs56388170	T	G	7	28724374	intronic	CREB5	TDP2	6	24658733	0.289189	-0.124645	0.00878515	1.0856e-45	0.00638724
	rs1354034	T	C	3	56849749	intronic	ARHGEF3	FAM212A	3	49841575	0.381863	-0.116224	0.00905144	9.73701e-38	0.00637697
	rs36084354	A	G	19	1079959	exonic	ARHGAP45	DEFA4	8	6794602	0.074114	-0.215453	0.0335789	1.39626e-10	0.00637076
	rs28453840	G	A	2	136522941	intronic	UBXN4	ENSG00000229961	1	157156186	0.31882	-0.121047	0.021223	1.17303e-08	0.00636425
	rs56388170	T	G	7	28724374	intronic	CREB5	AGAP7	10	51475244	0.289189	0.124416	0.0194012	1.42871e-10	0.00636385
	rs73396800	C	G	6	32914726	intergenic	HLA-DMB;HLA-DMA	TRAV38-1	14	22740148	0.0724388	-0.217593	0.0392279	2.90779e-08	0.00636261
	rs6084653	G	C	20	4157072	intronic	SMOX	BAG6	6	31613643	0.36636	-0.116974	0.0152621	1.79809e-14	0.00635267
	rs73396800	C	G	6	32914726	intergenic	HLA-DMB;HLA-DMA	TRBV7-3	7	142247362	0.0724388	0.217418	0.0392281	2.98354e-08	0.00635235
	rs9915021	T	C	17	33976619	intronic	AP2B1	MICAL2	11	12200438	0.0591544	0.238884	0.0250175	1.31334e-21	0.006352
	rs56388170	T	G	7	28724374	intronic	CREB5	PGLYRP1	19	46524367	0.289189	-0.124297	0.00877971	1.68339e-45	0.00635165
	rs10512472	C	T	17	33884804	exonic	SLFN14	ITGB5	3	124543734	0.179037	0.146988	0.0103353	6.69129e-46	0.0063513
	rs1354034	T	C	3	56849749	intronic	ARHGEF3	SWI5	9	131044463	0.381863	-0.115964	0.00912792	5.5968e-37	0.00634845
	rs41315846	C	T	1	247712303	intronic	GCSAML	PTP4A2P2	11	133993973	0.457199	-0.113036	0.0190753	3.10781e-09	0.00634177
	rs2227901	A	G	4	57798189	exonic	REST	RUNDC3A	17	42390910	0.203258	0.139872	0.00984016	7.4588e-46	0.0063366
	rs3748136	A	G	8	9030160	intergenic	PPP1R3B;LOC101929128	TNK2-AS1	3	195636537	0.189235	-0.143595	0.0242604	3.24102e-09	0.0063271
	rs1354034	T	C	3	56849749	intronic	ARHGEF3	RP11-401P9.5	16	50702836	0.381863	-0.115761	0.0195592	3.24891e-09	0.00632625
	rs1354034	T	C	3	56849749	intronic	ARHGEF3	MGAT4B	5	179229274	0.381863	-0.115749	0.00815063	8.99285e-46	0.006325
	rs429150	T	C	6	32075563	intronic	TNXB	TRBV4-1	7	142013248	0.478581	-0.112556	0.0203559	3.21328e-08	0.00632278
	rs149007767	T	C	7	50370254	intronic	IKZF1	MIR223	X	65238766	0.149708	-0.15753	0.0272453	7.38616e-09	0.00631783
	rs1265093	A	G	6	31107187	intronic	PSORS1C1	TRBV5-1	7	142020929	0.250598	-0.129634	0.0234648	3.30237e-08	0.00631187
	rs11602954	A	G	11	202856	downstream	BET1L	GNG11	7	93553421	0.211758	0.13749	0.0106772	6.06474e-38	0.00631064
	rs7846314	T	A	8	61650831	intronic	CHD7	DEFA3	8	6874607	0.178349	-0.146737	0.024824	3.39831e-09	0.00631054
	rs4766578	A	T	12	111904371	intronic	ATXN2	RP11-439A17.9	1	120929317	0.531061	-0.11256	0.0199894	1.79168e-08	0.00631045
	rs3131379	A	G	6	31721033	ncRNA_intronic	MSH5-SAPCD1	RP11-291B21.2	12	10708305	0.10444	-0.183527	0.0332495	3.39579e-08	0.00630075
	rs28383314	T	C	6	32587213	intergenic	HLA-DRB1;HLA-DQA1	XRCC6	22	42038583	0.383654	-0.115239	0.00979049	5.53952e-32	0.00628049
	rs873549	C	T	1	222271767	intergenic	LINC02474;HHIPL2	ENSG00000234810	1	56123692	0.280882	-0.124675	0.0107273	3.17844e-31	0.00627935
	rs590856	G	A	6	139844429	intergenic	LINC01625;FILNC1	PSMF1	20	1121464	0.465502	-0.112317	0.00795341	2.78383e-45	0.00627756
	rs35979828	T	C	12	54685880	downstream	NFE2	RP11-166N6.2	3	150682514	0.0571059	-0.241438	0.040953	3.73549e-09	0.00627749
	rs1354034	T	C	3	56849749	intronic	ARHGEF3	ST3GAL3	1	44284163	0.381863	-0.1153	0.00817849	3.9124e-45	0.00627593
	rs10512472	C	T	17	33884804	exonic	SLFN14	GNAS	20	57450510	0.179037	0.146062	0.0103292	2.13154e-45	0.00627147
	rs35033748	C	T	17	27179590	intergenic	FAM222B;ERAL1	ADIPOR1	1	202918825	0.215702	-0.136111	0.0103752	2.56972e-39	0.00626829
	rs17803780	C	T	9	4849647	intronic	RCL1	TSTA3	8	144697503	0.207033	-0.138122	0.00979135	3.46346e-45	0.00626396
	rs10512472	C	T	17	33884804	exonic	SLFN14	ENDOD1	11	94844391	0.179037	0.145921	0.0103997	1.00438e-44	0.00625935
	rs8073060	A	T	17	33875262	exonic	SLFN14	44987	19	8491027	0.305723	0.121337	0.00866404	1.45894e-44	0.00624999
	rs8073060	A	T	17	33875262	exonic	SLFN14	RGS18	1	192141266	0.305723	-0.121322	0.00869392	2.94126e-44	0.00624841
	rs72928038	A	G	6	90976768	intronic	BACH2	C14orf132	14	96533039	0.158151	-0.153147	0.0119243	9.37896e-38	0.00624529
	rs2285803	T	C	6	31107258	intronic	PSORS1C1	TRAV38-1	14	22740148	0.322765	0.119451	0.0217504	3.97633e-08	0.00623784
	rs11602954	A	G	11	202856	downstream	BET1L	CLEC1B	12	10152132	0.211758	0.136617	0.0106776	1.75529e-37	0.00623073
	rs7606173	C	G	2	60725451	intronic	BCL11A	PHOSPHO1	17	47304426	0.393094	-0.114248	0.00812249	6.17965e-45	0.00622791
	rs10761741	T	G	10	65066186	intronic	JMJD1C	C7orf41	7	30188402	0.420816	0.112966	0.00875309	4.16916e-38	0.00622068
	rs10822184	C	T	10	65337153	intronic	REEP3	ITGA2B	17	42458210	0.511758	0.111561	0.00796392	1.38685e-44	0.00621949
	rs55908509	A	G	19	16442019	intergenic	KLF2;EPS15L1	CCL3	17	34416558	0.3284	0.118735	0.0188567	3.04049e-10	0.00621873
	rs3131379	A	G	6	31721033	ncRNA_intronic	MSH5-SAPCD1	XRCC6	22	42038583	0.10444	-0.182318	0.0158946	1.85798e-30	0.00621799
	rs8073060	A	T	17	33875262	exonic	SLFN14	TSPAN9	12	3291125	0.305723	0.121023	0.00866418	2.43708e-44	0.00621765
	rs7950726	A	C	11	5225447	intergenic	OR51V1;HBB	PWP1	12	108093226	0.130877	-0.16528	0.0117419	5.32695e-45	0.00621466
	rs55793580	T	C	9	127009395	intergenic	LHX2;NEK6	FAR2	12	29397974	0.169838	-0.148416	0.011749	1.40122e-36	0.00621142
	rs1354034	T	C	3	56849749	intronic	ARHGEF3	ACTN1	14	69393508	0.381863	-0.114613	0.0081788	1.29075e-44	0.00620138
	rs10512472	C	T	17	33884804	exonic	SLFN14	SEC14L5	16	5038738	0.179037	0.145203	0.0104	2.66614e-44	0.00619797
	rs145171343	T	C	17	33886764	UTR5	SLFN14	PTGS1	9	125145403	0.0138172	0.47678	0.0418169	4.10504e-30	0.00619503
	rs149007767	T	C	7	50370254	intronic	IKZF1	GHRLOS	3	10330903	0.149708	-0.155973	0.027247	1.038e-08	0.00619357
	rs149007767	T	C	7	50370254	intronic	IKZF1	C4BPA	1	207297962	0.149708	0.15591	0.0172621	1.68717e-19	0.00618858
	rs4917014	G	T	7	50305863	intergenic	SPATA48;IKZF1	IFI44L	1	79097045	0.316454	-0.119532	0.00856697	3.03342e-44	0.00618121
	rs149110519	T	C	6	144385777	upstream	PLAGL1	IQCE	7	2626500	0.0526158	0.248942	0.0196814	1.13886e-36	0.0061783
	rs16971217	G	C	17	33944055	intronic	AP2B1	ABLIM3	5	148580575	0.177288	0.145513	0.0104521	4.6634e-44	0.00617676
	rs1354034	T	C	3	56849749	intronic	ARHGEF3	FAH	15	80462060	0.381863	-0.114372	0.00815124	1.00438e-44	0.00617532
	rs149007767	T	C	7	50370254	intronic	IKZF1	FNIP1	5	130947147	0.149708	0.155739	0.0124953	1.17629e-35	0.00617499
	rs145171343	T	C	17	33886764	UTR5	SLFN14	45174	22	19707141	0.0138172	0.475791	0.0418175	5.39434e-30	0.00616935
	rs10984466	G	A	9	100707992	upstream	HEMGN	RP11-498E2.9	9	125134994	0.356829	0.115902	0.0198412	5.17329e-09	0.00616595
	rs826415	G	T	1	118153977	intronic	TENT5C	PROS1	3	93642395	0.308498	0.120185	0.0127795	5.22782e-21	0.00616277
	rs6592965	A	G	7	50427982	intronic	IKZF1	GSPT1	16	11985962	0.449532	0.111583	0.00796116	1.24609e-44	0.00616194
	rs10744777	C	T	12	112233018	intronic	ALDH2	GBP5	1	89731588	0.355969	-0.115886	0.0139377	9.20622e-17	0.00615763
	rs35979828	T	C	12	54685880	downstream	NFE2	ASPH	8	62520135	0.0571059	-0.239005	0.0175874	4.62227e-42	0.00615158
	rs41268896	A	G	6	32070069	intronic	TNXB	TRAV2	14	22180805	0.334909	-0.117349	0.0171648	8.10948e-12	0.00613476
	rs1354034	T	C	3	56849749	intronic	ARHGEF3	ARHGAP18	6	129964323	0.381863	-0.113989	0.00815141	1.95476e-44	0.00613401
	rs1354034	T	C	3	56849749	intronic	ARHGEF3	SLC40A1	2	190436894	0.381863	0.113923	0.00817911	4.25192e-44	0.00612693
	rs10512472	C	T	17	33884804	exonic	SLFN14	TREML1	6	41119577	0.179037	0.144322	0.0103299	2.33656e-44	0.00612294
	rs4895441	G	A	6	135426573	intergenic	HBS1L;MYB	TMPRSS9	19	2408003	0.273956	-0.124011	0.00976052	5.51865e-37	0.00611781
	rs6592965	A	G	7	50427982	intronic	IKZF1	EIF1B	3	40352545	0.449532	0.111179	0.0118659	7.28079e-21	0.00611739
	rs149110519	T	C	6	144385777	upstream	PLAGL1	ACSL4	X	108924605	0.0526158	0.247685	0.0425321	5.76278e-09	0.00611608
	rs1265564	C	A	12	111708458	intronic	CUX2	FRMPD3	X	106807080	0.421923	-0.111888	0.0192435	6.08881e-09	0.0061068
	rs8887	T	C	19	4502201	UTR3	HDGFL2	HBM	16	210329	0.460179	0.110848	0.00865799	1.57738e-37	0.0061047
	rs56388170	T	G	7	28724374	intronic	CREB5	RP11-321E2.3	5	17422965	0.289189	-0.121853	0.0209617	6.13264e-09	0.0061043
	rs1354034	T	C	3	56849749	intronic	ARHGEF3	ETFA	15	76555754	0.381863	-0.113687	0.00815154	3.29502e-44	0.00610162
	rs1354034	T	C	3	56849749	intronic	ARHGEF3	AC114752.3	2	64566991	0.381863	-0.113642	0.0195614	6.26597e-09	0.00609679
	rs1354034	T	C	3	56849749	intronic	ARHGEF3	TAGLN2	1	159891709	0.381863	-0.11363	0.00818444	7.95302e-44	0.00609552
	rs592423	A	C	6	139840693	intergenic	LINC01625;FILNC1	PIM1	6	37140590	0.467953	0.110632	0.00797862	1.01797e-43	0.00609454
	rs56378716	G	A	17	56356502	exonic	MPO	HSP90B1	12	104335654	0.0168293	-0.428894	0.0627901	8.45602e-12	0.0060873
	rs225245	G	A	17	33946107	intronic	AP2B1	GYPC	2	127433877	0.440335	-0.11113	0.00801955	1.14756e-43	0.00608702
	rs7846314	T	A	8	61650831	intronic	CHD7	PISD	22	32036447	0.178349	0.144034	0.0103999	1.27922e-43	0.00608022
	rs17696736	G	A	12	112486818	intronic	NAA25	CD99	X	2634285	0.408694	-0.112113	0.0193329	6.66718e-09	0.00607511
	rs13277976	A	T	8	61679038	intronic	CHD7	MSL3	X	11785074	0.214178	0.13424	0.0179268	6.98246e-14	0.00606585
	rs149110519	T	C	6	144385777	upstream	PLAGL1	STAG2	X	123325288	0.0526158	-0.246654	0.0425332	6.66718e-09	0.00606525
	rs6084653	G	C	20	4157072	intronic	SMOX	UBXN6	19	4451407	0.36636	-0.114283	0.0082349	8.62336e-44	0.0060638
	rs4149577	G	A	12	6447522	intronic	TNFRSF1A	NFKBIA	14	35872336	0.462926	0.110357	0.0118383	1.1406e-20	0.0060559
	rs1354034	T	C	3	56849749	intronic	ARHGEF3	KIF2A	5	61717532	0.381863	-0.113218	0.00815175	7.40658e-44	0.00605137
	rs55908509	A	G	19	16442019	intergenic	KLF2;EPS15L1	PDGFRB	5	149514411	0.3284	-0.117069	0.00996231	6.9623e-32	0.00604545
	rs77526211	A	G	13	40974023	ncRNA_intronic	LINC00598	VMP1	17	57852084	0.0432109	-0.270182	0.0228271	2.54294e-32	0.00603604
	rs11066301	G	A	12	112871372	intronic	PTPN11	STAT1	2	191857385	0.400736	0.112062	0.0081463	4.67459e-43	0.00603148
	rs56388170	T	G	7	28724374	intronic	CREB5	RGL4	22	24035843	0.289189	-0.121116	0.00878112	2.81614e-43	0.00603075
	rs149007767	T	C	7	50370254	intronic	IKZF1	NBPF10	1	145330037	0.149708	0.15389	0.0220568	3.0155e-12	0.00602929
	rs56330463	T	C	5	148200011	intergenic	HTR4;ADRB2	LINC00211	2	38078403	0.417903	-0.111319	0.0192698	7.60895e-09	0.00602897
	rs7846314	T	A	8	61650831	intronic	CHD7	ENSG00000267753	19	31828867	0.178349	0.143357	0.0126089	5.93265e-30	0.0060232
	rs760517	T	C	22	37258986	ncRNA_intronic	NCF4-AS1	HNRNPA1P21	3	39376950	0.32952	0.116726	0.0202199	7.7965e-09	0.00602046
	rs12478601	C	T	2	43721508	intronic	THADA	PLBD1	12	14688939	0.425396	0.110903	0.00884129	4.3042e-36	0.00601278
	rs3896594	G	T	2	8762414	intergenic	LINC01814;ID2-AS1	TRIM10	6	30124216	0.377086	0.113132	0.0121797	1.56331e-20	0.00601271
	rs10820606	C	A	9	99192919	intergenic	ZNF367;HABP4	BAMBI	10	28969069	0.236914	-0.128935	0.0103581	1.43753e-35	0.00601086
	rs10876550	G	A	12	54712308	intergenic	NFE2;COPZ1	ENSG00000175746	15	39544965	0.409936	0.111441	0.00814974	1.44791e-42	0.00600809
	rs9399137	C	T	6	135419018	intergenic	HBS1L;MYB	RAP1GAP	1	21959254	0.264393	0.124265	0.00899702	2.16357e-43	0.00600652
	rs141094656	C	T	1	92753336	intronic	GLMN	MLTK	2	174036450	0.0195137	-0.396085	0.0346552	2.98505e-30	0.00600327
	rs11066301	G	A	12	112871372	intronic	PTPN11	CD99	X	2634285	0.400736	-0.11178	0.0193945	8.23873e-09	0.0060012
	rs3811444	T	C	1	248039451	exonic	TRIM58	MAP2K3	17	21203268	0.337611	-0.115751	0.00840362	3.65914e-43	0.00599248
	rs13217619	C	T	6	28306671	intronic	ZSCAN31	TRAV38-1	14	22740148	0.0881228	-0.193034	0.033528	8.54193e-09	0.00598858
	rs16907751	T	C	8	81375457	intergenic	MIR5708;ZBTB10	DOC2GP	11	67381926	0.112445	-0.173199	0.0278491	4.99696e-10	0.00598767
	rs1354034	T	C	3	56849749	intronic	ARHGEF3	TNFSF4	1	173164662	0.381863	-0.112582	0.0081797	4.2198e-43	0.00598358
	rs1265564	C	A	12	111708458	intronic	CUX2	STAT1	2	191857385	0.421923	0.110723	0.00807639	8.90695e-43	0.00598036
	rs11871801	C	A	17	40570772	intronic	CAVIN1	ARRDC4	15	98489926	0.260676	-0.124462	0.0090996	1.37989e-42	0.00597086
	rs28453840	G	A	2	136522941	intronic	UBXN4	PACSIN1	6	34468461	0.31882	-0.117196	0.00937749	7.69391e-36	0.00596573
	rs6592965	A	G	7	50427982	intronic	IKZF1	RAP1GAP	1	21959254	0.449532	0.109789	0.00796195	2.96024e-43	0.0059654
	rs592423	A	C	6	139840693	intergenic	LINC01625;FILNC1	GNA12	7	2825852	0.467953	-0.109404	0.00795712	5.14958e-43	0.00596003
	rs10876550	G	A	12	54712308	intergenic	NFE2;COPZ1	TSPAN9	12	3291125	0.409936	-0.110886	0.00805308	3.89434e-43	0.00594838
	rs10512472	C	T	17	33884804	exonic	SLFN14	HIST1H2AE	6	26217438	0.179037	-0.142063	0.0103309	5.00917e-43	0.00593276
	rs149007767	T	C	7	50370254	intronic	IKZF1	TTLL4	2	219597853	0.149708	-0.152652	0.0113938	6.22821e-41	0.00593264
	rs6084653	G	C	20	4157072	intronic	SMOX	RBM38	20	55975426	0.36636	0.113032	0.00826351	1.36479e-42	0.0059318
	rs149110519	T	C	6	144385777	upstream	PLAGL1	CHST13	3	126252630	0.0526158	0.243811	0.0196839	3.1002e-35	0.00592622
	rs1012068	G	T	22	32265903	intronic	DEPDC5	LCN2	9	130913542	0.276034	-0.121706	0.0132053	3.07242e-20	0.00592015
	rs149007767	T	C	7	50370254	intronic	IKZF1	GLIPR2	9	36150321	0.149708	-0.152386	0.0113939	8.54544e-41	0.00591197
	rs11602954	A	G	11	202856	downstream	BET1L	SEC14L5	16	5038738	0.211758	0.133076	0.0107439	3.10407e-35	0.00591196
	rs10423726	C	A	19	16444697	intergenic	KLF2;EPS15L1	STX1A	7	73123769	0.404467	-0.110767	0.0192028	8.00752e-09	0.00591076
	rs8887	T	C	19	4502201	UTR3	HDGFL2	AC159540.1	2	98086433	0.460179	0.108966	0.01907	1.10351e-08	0.00589916
	rs141094656	C	T	1	92753336	intronic	GLMN	STAB1	3	52543932	0.0195137	-0.392401	0.0348299	1.92709e-29	0.0058921
	rs13062095	C	T	3	101267385	intergenic	FAM172BP;TRMT10C	ZC4H2	X	64195421	0.350092	0.113702	0.0154197	1.65832e-13	0.00588301
	rs225245	G	A	17	33946107	intronic	AP2B1	BTNL10	1	228698181	0.440335	-0.109251	0.0191464	1.15594e-08	0.00588296
	rs8073060	A	T	17	33875262	exonic	SLFN14	CTDSPL	3	37964705	0.305723	0.117707	0.00866564	5.03765e-42	0.00588161
	rs17693963	C	A	6	27710165	intergenic	LINC01012;LOC100131289	TRAV12-2	14	22356359	0.0887937	0.19063	0.027257	2.67539e-12	0.00588047
	rs6084653	G	C	20	4157072	intronic	SMOX	GATA1	X	48648840	0.36636	-0.112515	0.0152658	1.70117e-13	0.00587761
	rs225245	G	A	17	33946107	intronic	AP2B1	SHARPIN	8	145158281	0.440335	-0.109193	0.00804791	6.20751e-42	0.00587669
	rs111778408	A	G	14	35572163	ncRNA_intronic	LOC101927178	RHOQ	2	46789602	0.100785	-0.179918	0.0156748	1.69778e-30	0.00586731
	rs78744187	T	C	19	33754548	intergenic	SLC7A10;CEBPA	TPSAB1	16	1291626	0.0806295	0.198828	0.0170517	2.03325e-31	0.00586097
	rs149110519	T	C	6	144385777	upstream	PLAGL1	MRVI1	11	10655086	0.0526158	0.242335	0.0196846	7.91358e-35	0.00585471
	rs149110519	T	C	6	144385777	upstream	PLAGL1	BMX	X	15528510	0.0526158	0.24232	0.0425377	1.2222e-08	0.00585398
	rs6592965	A	G	7	50427982	intronic	IKZF1	B4GALT3	1	161144193	0.449532	0.108744	0.00881353	5.63327e-35	0.00585239
	rs41266839	C	G	6	26409890	exonic	BTN3A1	TRAV38-1	14	22740148	0.0792497	-0.200206	0.0351869	1.27188e-08	0.00584959
	rs3184504	C	T	12	111884608	exonic	SH2B3	MTX1	1	155181052	0.542056	0.108538	0.0176596	7.94112e-10	0.00584856
	rs73204034	T	C	12	116839021	intergenic	MED13L;MIR4472-2	AC104809.4	2	241900451	0.0928617	0.186292	0.0327489	1.2816e-08	0.00584693
	rs1354034	T	C	3	56849749	intronic	ARHGEF3	CLEC2L	7	139219166	0.381863	-0.111286	0.00896855	2.35014e-35	0.00584663
	rs6600233	T	C	16	143503	intronic	NPRL3	RP4-669L17.10	1	385834	0.435703	-0.108992	0.0191692	1.30202e-08	0.00584142
	rs6592965	A	G	7	50427982	intronic	IKZF1	SLC7A5	16	87883361	0.449532	0.108632	0.00796245	2.22227e-42	0.00584031
	rs149007767	T	C	7	50370254	intronic	IKZF1	SCARF1	17	1543096	0.149708	-0.151457	0.0113943	2.56569e-40	0.00584012
	rs10774624	A	G	12	111833788	intergenic	PHETA1;SH2B3	LUCAT1	5	90604532	0.538565	0.10827	0.019067	1.3596e-08	0.00582631
	rs1532331	G	T	5	43116830	intergenic	LOC100506639;ZNF131	CAMK2N1	1	20810798	0.316115	-0.116077	0.00851887	2.80926e-42	0.00582576
	rs149110519	T	C	6	144385777	upstream	PLAGL1	MID1IP1	X	38663237	0.0526158	0.241703	0.0425383	1.33129e-08	0.00582419
	rs145171343	T	C	17	33886764	UTR5	SLFN14	SPARC	5	151053691	0.0138172	0.462231	0.0418248	2.15342e-28	0.0058227
	rs149110519	T	C	6	144385777	upstream	PLAGL1	GK	X	30710100	0.0526158	-0.241668	0.0306923	3.43754e-15	0.00582253
	rs35033748	C	T	17	27179590	intergenic	FAM222B;ERAL1	CDC34	19	536900	0.215702	-0.131177	0.01037	1.12303e-36	0.00582211
	rs11653357	A	G	17	33923607	intronic	AP2B1	CXCR2P1	2	218927165	0.17703	0.141224	0.0120936	1.65914e-31	0.00581139
	rs10512472	C	T	17	33884804	exonic	SLFN14	NPRL3	16	161566	0.179037	0.140587	0.0103666	6.77366e-42	0.00581016
	rs10774624	A	G	12	111833788	intergenic	PHETA1;SH2B3	GBP1P1	1	89882520	0.538565	-0.108092	0.0190671	1.43633e-08	0.00580715
	rs56388170	T	G	7	28724374	intronic	CREB5	GHRL	3	10330995	0.289189	0.118816	0.0130211	7.18025e-20	0.00580387
	rs149110519	T	C	6	144385777	upstream	PLAGL1	CECR6	22	17599723	0.0526158	-0.241274	0.0196851	1.54671e-34	0.00580357
	rs13062095	C	T	3	101267385	intergenic	FAM172BP;TRMT10C	ZNF606	19	58501569	0.350092	0.112905	0.00831906	5.87784e-42	0.00580088
	rs149007767	T	C	7	50370254	intronic	IKZF1	ITGA5	12	54801144	0.149708	-0.150936	0.0113946	4.74002e-40	0.00580001
	rs149007767	T	C	7	50370254	intronic	IKZF1	GDI1	X	153668540	0.149708	0.150899	0.0220594	7.88622e-12	0.0057972
	rs149007767	T	C	7	50370254	intronic	IKZF1	DPEP2	16	68027893	0.149708	0.150895	0.0124977	1.45091e-33	0.0057969
	rs34706883	C	A	6	27805255	downstream	H2AC15	TRAV38-1	14	22740148	0.0838373	-0.194208	0.0342971	1.49183e-08	0.00579392
	rs149110519	T	C	6	144385777	upstream	PLAGL1	ATF6	1	161834972	0.0526158	-0.241051	0.0196852	1.78018e-34	0.00579284
	rs1339847	A	G	1	248039294	exonic	TRIM58	JAM3	11	133980358	0.103051	0.176989	0.0131082	1.51775e-41	0.00579085
	rs13062095	C	T	3	101267385	intergenic	FAM172BP;TRMT10C	ZNF416	19	58086614	0.350092	0.112786	0.00831911	7.15328e-42	0.00578865
	rs13062095	C	T	3	101267385	intergenic	FAM172BP;TRMT10C	CD300A	17	72471744	0.350092	-0.112777	0.009081	2.06122e-35	0.00578768
	rs2143950	T	C	14	35572357	ncRNA_intronic	LOC101927178	IL2RG	X	70329606	0.1592	0.146985	0.0201047	2.65162e-13	0.0057838
	rs4895441	G	A	6	135426573	intergenic	HBS1L;MYB	GATA1	X	48648840	0.273956	-0.120564	0.0164928	2.66944e-13	0.00578239
	rs225245	G	A	17	33946107	intronic	AP2B1	KEL	7	142648984	0.440335	-0.108188	0.0118923	9.26053e-20	0.00576901
	rs10187424	C	T	2	85794297	intergenic	GGCX;VAMP8	LINC00211	2	38078403	0.420816	0.108768	0.0192537	1.61196e-08	0.00576689
	rs3896594	G	T	2	8762414	intergenic	LINC01814;ID2-AS1	VWCE	11	61044329	0.377086	0.110714	0.00818778	1.16137e-41	0.00575846
	rs1354034	T	C	3	56849749	intronic	ARHGEF3	PYCR2	1	226109778	0.381863	-0.110422	0.00815296	8.62112e-42	0.00575617
	rs34706883	C	A	6	27805255	downstream	H2AC15	TRBV2	7	142001001	0.0838373	0.193471	0.0342979	1.69164e-08	0.00575005
	rs56388170	T	G	7	28724374	intronic	CREB5	AC007879.2	2	208076115	0.289189	0.11821	0.0209655	1.71737e-08	0.00574478
	rs9915021	T	C	17	33976619	intronic	AP2B1	VWCE	11	61044329	0.0591544	0.227174	0.016821	1.45322e-41	0.0057445
	rs8072451	T	C	17	43893716	intronic	CRHR1;LINC02210-CRHR1	BAG6	6	31613643	0.196577	0.134854	0.0192538	2.48756e-12	0.00574423
	rs149007767	T	C	7	50370254	intronic	IKZF1	HM13	20	30129800	0.149708	-0.150123	0.0113949	1.2304e-39	0.00573766
	rs1990760	C	T	2	163124051	exonic	IFIH1	IFI44L	1	79097045	0.396134	-0.109428	0.00853439	1.23474e-37	0.00572887
	rs8073060	A	T	17	33875262	exonic	SLFN14	RNF187	1	228679114	0.305723	0.116157	0.00952846	3.49272e-34	0.00572769
	rs592423	A	C	6	139840693	intergenic	LINC01625;FILNC1	RNF182	6	13952605	0.467953	-0.107226	0.00871416	8.53476e-35	0.00572509
	rs6592965	A	G	7	50427982	intronic	IKZF1	SLC6A8	X	152957801	0.449532	0.107551	0.0118682	1.27963e-19	0.00572471
	rs56388170	T	G	7	28724374	intronic	CREB5	RP11-875O11.3	8	22930445	0.289189	0.117916	0.0209658	1.8637e-08	0.00571625
	rs1354034	T	C	3	56849749	intronic	ARHGEF3	MMP1	11	102664771	0.381863	-0.11001	0.00815314	1.71958e-41	0.00571332
	rs149110519	T	C	6	144385777	upstream	PLAGL1	C1RL	12	7252026	0.0526158	0.239274	0.0196861	5.42929e-34	0.00570774
	rs7606173	C	G	2	60725451	intronic	BCL11A	IFIT1B	10	91141387	0.393094	-0.109305	0.00886872	6.66085e-35	0.00570072
	rs6592965	A	G	7	50427982	intronic	IKZF1	KLF1	19	12996616	0.449532	0.107269	0.00796303	2.3202e-41	0.00569473
	rs8073060	A	T	17	33875262	exonic	SLFN14	CARM1	19	11007821	0.305723	0.11579	0.00869636	1.8988e-40	0.00569161
	rs13062095	C	T	3	101267385	intergenic	FAM172BP;TRMT10C	ZNF548	19	57907002	0.350092	0.111799	0.00831953	3.61602e-41	0.00568771
	rs56388170	T	G	7	28724374	intronic	CREB5	GYG1	3	148727273	0.289189	-0.117591	0.0130219	1.71202e-19	0.00568483
	rs149110519	T	C	6	144385777	upstream	PLAGL1	PILRA	7	99981436	0.0526158	0.238657	0.0199645	6.17995e-33	0.00567834
	rs10423726	C	A	19	16444697	intergenic	KLF2;EPS15L1	PTGDS	9	139875921	0.404467	0.108537	0.0192051	1.59054e-08	0.00567516
	rs6592965	A	G	7	50427982	intronic	IKZF1	KCNH2	7	150658726	0.449532	0.10704	0.00796313	3.43038e-41	0.00567046
	rs13217619	C	T	6	28306671	intronic	ZSCAN31	TRAV8-1	14	22265758	0.0881228	0.187807	0.0335334	2.13611e-08	0.00566865
	rs1185567	A	G	6	25818588	intronic	SLC17A1	RNF5P1	8	38458448	0.451118	-0.106896	0.0191033	2.19733e-08	0.00565879
	rs1265564	C	A	12	111708458	intronic	CUX2	GBP1	1	89524522	0.421923	0.107633	0.00810554	3.06459e-40	0.00565124
	rs2746427	T	A	6	135669097	intronic	AHI1	TRAV1-1	14	22090355	0.451719	-0.106755	0.00944663	1.2988e-29	0.00564523
	rs1354034	T	C	3	56849749	intronic	ARHGEF3	ANKRD9	14	102974657	0.381863	-0.109347	0.00818109	9.57995e-41	0.00564462
	rs3811444	T	C	1	248039451	exonic	TRIM58	PLEK2	14	67866308	0.337611	-0.112333	0.00837666	5.26965e-41	0.00564381
	rs13062095	C	T	3	101267385	intergenic	FAM172BP;TRMT10C	ZNF577	19	52376629	0.350092	0.111294	0.00834809	1.51408e-40	0.0056365
	rs7329174	G	A	13	41558110	intronic	ELF1	DBNDD2	20	44036973	0.0659137	-0.213947	0.039234	4.94992e-08	0.00563643
	rs8073060	A	T	17	33875262	exonic	SLFN14	FURIN	15	91419255	0.305723	0.115184	0.00866673	2.63168e-40	0.00563219
	rs10176176	T	A	2	85762048	intergenic	SH2D6;PARTICL	AC004069.2	4	106060106	0.478292	-0.106233	0.01903	2.37222e-08	0.00563207
	rs111945767	C	G	6	32517045	intergenic	HLA-DRB5;HLA-DRB6	RPS6KA1	1	26878886	0.405314	-0.108057	0.00989435	9.13823e-28	0.00562881
	rs149110519	T	C	6	144385777	upstream	PLAGL1	NOV	8	120432569	0.0526158	0.237604	0.0196868	1.5362e-33	0.00562836
	rs4982731	C	T	14	23585333	intergenic	LMLN2;CEBPE	CPA3	3	148599013	0.278225	-0.118324	0.00883992	7.37985e-41	0.00562308
	rs1354034	T	C	3	56849749	intronic	ARHGEF3	TST	22	37411290	0.381863	-0.10913	0.00820337	2.22067e-40	0.00562228
	rs10984466	G	A	9	100707992	upstream	HEMGN	AQP10	1	154295683	0.356829	0.110669	0.00831243	1.92697e-40	0.00562173
	rs1354034	T	C	3	56849749	intronic	ARHGEF3	MYOM1	18	3143455	0.381863	-0.109118	0.00815351	7.61185e-41	0.00562098
	rs149007767	T	C	7	50370254	intronic	IKZF1	CA4	17	58237778	0.149708	0.148477	0.0113956	8.3369e-39	0.00561259
	rs1354034	T	C	3	56849749	intronic	ARHGEF3	SMOX	20	4135010	0.381863	-0.109021	0.00818123	1.64086e-40	0.00561099
	rs17696736	G	A	12	112486818	intronic	NAA25	GBP1	1	89524522	0.408694	0.107708	0.00815044	7.18863e-40	0.00560708
	rs149007767	T	C	7	50370254	intronic	IKZF1	TMEM92	17	48353805	0.149708	-0.148378	0.0114364	1.716e-38	0.00560506
	rs35033748	C	T	17	27179590	intergenic	FAM222B;ERAL1	VTI1B	14	68127670	0.215702	-0.12865	0.0167176	1.40942e-14	0.00559995
	rs505404	G	T	11	243268	intronic	PSMD13	CALD1	7	134542241	0.222031	0.127244	0.00955485	1.83875e-40	0.00559345
	rs2073820	C	T	9	135864177	intronic	GFI1B	ITLN1	1	160850644	0.409124	0.107555	0.0121533	8.75978e-19	0.00559301
	rs2998286	T	C	10	28780373	ncRNA_intronic	LINC02652	RP11-875O11.3	8	22930445	0.220901	-0.127417	0.0229146	2.69003e-08	0.00558822
	rs675209	T	C	6	7102084	intergenic	LY86;RREB1	RP11-571M6.8	12	58118496	0.294453	0.115955	0.0208563	2.70239e-08	0.00558662
	rs6084653	G	C	20	4157072	intronic	SMOX	UBBP4	17	21730681	0.36636	-0.109692	0.0197303	2.70394e-08	0.00558642
	rs6592965	A	G	7	50427982	intronic	IKZF1	MKRN1	7	140166104	0.449532	0.106221	0.0118691	3.5742e-19	0.005584
	rs149007767	T	C	7	50370254	intronic	IKZF1	CCNG2	4	78216423	0.149708	0.148056	0.0114366	2.48164e-38	0.00558077
	rs149007767	T	C	7	50370254	intronic	IKZF1	CDC42EP2	11	65086094	0.149708	-0.148044	0.0113958	1.37437e-38	0.00557991
	rs8026803	C	T	15	80260014	exonic	BCL2A1	CDH23	10	73366196	0.247924	-0.122279	0.00917404	1.57409e-40	0.00557588
	rs3774937	C	T	4	103434253	intronic	NFKB1	ZG16B	16	2884568	0.320593	0.11312	0.00853249	4.07737e-40	0.00557436
	rs35033748	C	T	17	27179590	intergenic	FAM222B;ERAL1	CA1	8	86265540	0.215702	0.128347	0.0103713	3.55563e-35	0.00557365
	rs724016	G	A	3	141105570	UTR5	ZBTB38	FBXL13	7	102584297	0.432429	-0.106534	0.00799621	1.70131e-40	0.00557106
	rs28453840	G	A	2	136522941	intronic	UBXN4	RP4-647C14.2	14	73711706	0.31882	-0.113221	0.0205584	3.64379e-08	0.00556793
	rs8082605	T	G	17	33864771	UTR5	SLFN12L	CNPPD1	2	220039723	0.0436372	0.258199	0.022714	6.07709e-30	0.0055644
	rs743002	C	T	22	41404939	intergenic	RBX1;SNORD140	NFE4	7	102621636	0.0474874	-0.248003	0.044698	2.88296e-08	0.00556406
	rs149007767	T	C	7	50370254	intronic	IKZF1	ZNF746	7	149182396	0.149708	0.14783	0.0113959	1.75908e-38	0.00556378
	rs505404	G	T	11	243268	intronic	PSMD13	SELP	1	169578759	0.222031	0.12685	0.00954896	2.85898e-40	0.0055589
	rs3811444	T	C	1	248039451	exonic	TRIM58	HIST1H2AE	6	26217438	0.337611	0.111456	0.00837703	2.16493e-40	0.0055561
	rs4788084	T	C	16	28539848	intergenic	IL27;NUPR1	STAT1	2	191857385	0.419635	-0.106802	0.00807638	6.37798e-40	0.00555599
	rs6084653	G	C	20	4157072	intronic	SMOX	R3HDM4	19	904871	0.36636	-0.109374	0.0091515	6.37639e-33	0.00555406
	rs56388170	T	G	7	28724374	intronic	CREB5	MPZL1	1	167725792	0.289189	0.116211	0.00881337	1.05924e-39	0.00555217
	rs10980921	C	T	9	114279912	intergenic	ECPAS;ZNF483	ENSG00000179455	15	23841759	0.0940779	-0.180411	0.0149563	1.66646e-33	0.00554797
	rs3733018	A	C	3	187456594	intronic	BCL6	RAB20	13	111194748	0.35857	-0.109795	0.00833201	1.18245e-39	0.00554522
	rs149110519	T	C	6	144385777	upstream	PLAGL1	CBX8	17	77770706	0.0526158	0.235836	0.0306966	1.55648e-14	0.00554488
	rs12485444	T	A	3	188135783	intronic	LPP	HMOX1	22	35783280	0.490804	0.105307	0.00798042	9.2888e-40	0.00554294
	rs56388170	T	G	7	28724374	intronic	CREB5	BASP1	5	17247306	0.289189	-0.11608	0.00878329	7.09372e-40	0.00553963
	rs7846314	T	A	8	61650831	intronic	CHD7	LCN2	9	130913542	0.178349	-0.137433	0.0154239	5.08488e-19	0.0055357
	rs10512472	C	T	17	33884804	exonic	SLFN14	HIST1H4H	6	26283522	0.179037	-0.137223	0.0103681	5.50235e-40	0.00553538
	rs6084653	G	C	20	4157072	intronic	SMOX	RP11-77H9.8	16	9058705	0.36636	-0.109143	0.0197308	3.17323e-08	0.0055306
	rs41266839	C	G	6	26409890	exonic	BTN3A1	TRAV29DV5	14	22631450	0.0792497	0.194671	0.0351925	3.17323e-08	0.0055306
	rs149007767	T	C	7	50370254	intronic	IKZF1	LIPN	10	90529581	0.149708	0.147376	0.0141482	2.08266e-25	0.00552965
	rs141094656	C	T	1	92753336	intronic	GLMN	ZBED3	5	76375522	0.0195137	-0.380133	0.0348362	1.01009e-27	0.00552946
	rs8073060	A	T	17	33875262	exonic	SLFN14	AP2A1	19	50290297	0.305723	0.114063	0.0086672	1.48495e-39	0.00552307
	rs149110519	T	C	6	144385777	upstream	PLAGL1	NCF1C	7	74580146	0.0526158	-0.235324	0.0425448	3.18047e-08	0.00552083
	rs56388170	T	G	7	28724374	intronic	CREB5	MSL3	X	11785074	0.289189	-0.115858	0.0162258	9.30597e-13	0.0055185
	rs10822184	C	T	10	65337153	intronic	REEP3	C7orf41	7	30188402	0.511758	0.104995	0.00866686	8.85022e-34	0.00550889
	rs149007767	T	C	7	50370254	intronic	IKZF1	ZBTB47	3	42702124	0.149708	-0.147076	0.0124995	5.80159e-32	0.00550718
	rs149007767	T	C	7	50370254	intronic	IKZF1	NHS	X	17573828	0.149708	-0.147052	0.0220626	2.64305e-11	0.00550534
	rs35979828	T	C	12	54685880	downstream	NFE2	RP1-193H18.2	17	67548750	0.0571059	-0.225879	0.0409691	3.51967e-08	0.00549447
	rs141094656	C	T	1	92753336	intronic	GLMN	TNNT1	19	55652442	0.0195137	0.378831	0.0530695	9.44235e-13	0.00549165
	rs11553699	G	A	12	122216910	UTR3	RHOF;TMEM120B	SPARC	5	151053691	0.10963	0.167719	0.0130243	6.0334e-38	0.00549155
	rs7846314	T	A	8	61650831	intronic	CHD7	RP11-455F5.3	16	30111594	0.178349	0.136864	0.0248342	3.56598e-08	0.00548991
	rs10512472	C	T	17	33884804	exonic	SLFN14	TSPAN33	7	128796691	0.179037	0.136605	0.0103333	6.73534e-40	0.00548564
	rs7846314	T	A	8	61650831	intronic	CHD7	DEFA4	8	6794602	0.178349	-0.136727	0.0192177	1.12238e-12	0.00547891
	rs1354034	T	C	3	56849749	intronic	ARHGEF3	MAX	14	65521152	0.381863	-0.107665	0.00815412	8.35293e-40	0.00547228
	rs149110519	T	C	6	144385777	upstream	PLAGL1	ECHDC3	10	11795217	0.0526158	0.234164	0.0197708	2.31435e-32	0.00546652
	rs10876550	G	A	12	54712308	intergenic	NFE2;COPZ1	AC147651.3	7	562448	0.409936	0.106287	0.0193298	3.82818e-08	0.00546517
	rs10761741	T	G	10	65066186	intronic	JMJD1C	MYL9	20	35174057	0.420816	0.105768	0.0080246	1.13635e-39	0.00545317
	rs1541777	G	A	2	219587291	intronic	TTLL4	HIST1H3D	6	26198294	0.466103	0.104669	0.0118365	9.32657e-19	0.0054526
	rs2974760	C	A	16	202049	upstream	HBZ	ENSG00000251297	4	190904852	0.381449	-0.107473	0.0178725	1.81784e-09	0.00545054
	rs56330463	T	C	5	148200011	intergenic	HTR4;ADRB2	IL13RA1	X	117895018	0.417903	-0.105841	0.014916	1.28605e-12	0.00545015
	rs10876550	G	A	12	54712308	intergenic	NFE2;COPZ1	GNG11	7	93553421	0.409936	-0.106113	0.00805511	1.24846e-39	0.00544733
	rs7785014	T	C	7	137881690	intergenic	MIR4468;TRIM24	KIAA1551	12	32129171	0.331668	-0.110847	0.00943407	7.09539e-32	0.00544716
	rs505404	G	T	11	243268	intronic	PSMD13	NRGN	11	124613849	0.222031	0.12556	0.0095495	1.74044e-39	0.00544636
	rs149007767	T	C	7	50370254	intronic	IKZF1	MICAL1	6	109776218	0.149708	0.14626	0.0124999	1.26109e-31	0.00544618
	rs141094656	C	T	1	92753336	intronic	GLMN	MARCO	2	119725989	0.0195137	-0.377227	0.0346649	1.40293e-27	0.00544525
	rs145171343	T	C	17	33886764	UTR5	SLFN14	PEAR1	1	156874858	0.0138172	0.446596	0.0484215	2.88632e-20	0.00543548
	rs2746427	T	A	6	135669097	intronic	AHI1	TRAV3	14	22192264	0.451719	-0.104736	0.00944763	1.46702e-28	0.00543372
	rs78744187	T	C	19	33754548	intergenic	SLC7A10;CEBPA	CA8	8	61146938	0.0806295	-0.191431	0.0168385	5.98727e-30	0.00543302
	rs149007767	T	C	7	50370254	intronic	IKZF1	CLASRP	19	45558256	0.149708	0.146012	0.0220635	3.64584e-11	0.00542773
	rs13198474	A	G	6	25874423	UTR5	SLC17A3	TRAV17	14	22466092	0.0692555	-0.205123	0.0305446	1.87422e-11	0.00542427
	rs13289095	T	G	9	131466489	intronic	PKN3	ABCA13	7	48449073	0.119513	0.16053	0.0128573	8.95788e-36	0.00542352
	rs652888	G	A	6	31851234	intronic	EHMT2	TRAV23DV6	14	22554961	0.206206	-0.128695	0.0200306	1.31956e-10	0.00542202
	rs13062095	C	T	3	101267385	intergenic	FAM172BP;TRMT10C	ZNF649	19	52400385	0.350092	0.109051	0.00832069	3.04226e-39	0.00541157
	rs505404	G	T	11	243268	intronic	PSMD13	ABLIM3	5	148580575	0.222031	0.125145	0.00954967	3.09892e-39	0.00541042
	rs35979828	T	C	12	54685880	downstream	NFE2	ANPEP	15	90343376	0.0571059	-0.224022	0.0175941	3.88647e-37	0.00540448
	rs342293	G	C	7	106372219	intergenic	CCDC71L;PIK3CG	RP11-152L20.3	15	92783124	0.450728	0.104459	0.0191072	4.57716e-08	0.00540287
	rs149110519	T	C	6	144385777	upstream	PLAGL1	AMPD2	1	110166699	0.0526158	0.232792	0.0196891	2.95479e-32	0.00540266
	rs141094656	C	T	1	92753336	intronic	GLMN	CYP2S1	19	41706199	0.0195137	-0.37571	0.0346657	2.27139e-27	0.00540154
	rs8073060	A	T	17	33875262	exonic	SLFN14	ITGB3	17	45376435	0.305723	0.112782	0.0128166	1.37182e-18	0.00539975
	rs17693963	C	A	6	27710165	intergenic	LINC01012;LOC100131289	TRBV5-4	7	142168712	0.0887937	0.182602	0.0334234	4.67364e-08	0.0053956
	rs3731827	C	T	2	85806068	intronic	VAMP8	RP11-448G15.3	4	10072178	0.418566	0.105275	0.0192716	4.68947e-08	0.00539442
	rs1354034	T	C	3	56849749	intronic	ARHGEF3	PYGB	20	25253677	0.381863	-0.10687	0.00815445	3.05431e-39	0.00539178
	rs1354034	T	C	3	56849749	intronic	ARHGEF3	CAPN11	6	44139343	0.381863	-0.106828	0.00815447	3.26665e-39	0.00538761
	rs55908509	A	G	19	16442019	intergenic	KLF2;EPS15L1	PRSS23	11	86583026	0.3284	-0.110513	0.00996561	1.41232e-28	0.00538726
	rs140244541	A	G	2	203808532	intronic	CARF	CKS1B	1	154949427	0.146567	0.146727	0.0248833	3.71068e-09	0.00538586
	rs12485444	T	A	3	188135783	intronic	LPP	CTD-3064M3.3	8	142364484	0.490804	0.103773	0.0190176	4.85065e-08	0.00538264
	rs56388170	T	G	7	28724374	intronic	CREB5	KIAA2013	1	11983066	0.289189	-0.114411	0.0194108	3.76501e-09	0.0053815
	rs141094656	C	T	1	92753336	intronic	GLMN	SASH1	6	148733313	0.0195137	0.374939	0.0348389	5.19721e-27	0.00537939
	rs149110519	T	C	6	144385777	upstream	PLAGL1	UBR2	6	42596521	0.0526158	-0.232215	0.0306992	3.90259e-14	0.00537592
	rs11675251	A	G	2	204249399	intronic	ABI2	CKS1B	1	154949427	0.453884	0.104124	0.0176766	3.85029e-09	0.00537479
	rs56388170	T	G	7	28724374	intronic	CREB5	AC116366.5	5	131758757	0.289189	-0.114317	0.0209694	4.99186e-08	0.00537264
	rs8026803	C	T	15	80260014	exonic	BCL2A1	CSF1R	5	149462894	0.247924	-0.120008	0.00917499	4.29004e-39	0.00537069
	rs7606173	C	G	2	60725451	intronic	BCL11A	PTMS	12	6877399	0.393094	0.106094	0.00812599	5.86566e-39	0.00537066
	rs11602954	A	G	11	202856	downstream	BET1L	C15orf26	15	81370445	0.211758	0.126832	0.0106822	1.63107e-32	0.0053702
	rs17695092	G	T	5	173337853	intronic	CPEB4	MED30	8	118542726	0.303144	-0.112728	0.00863554	6.02966e-39	0.00536894
	rs6929796	A	G	6	31522669	intronic	NFKBIL1	VMO1	17	4689154	0.166467	0.139046	0.0107548	3.09613e-38	0.00536538
	rs8078723	C	T	17	38166879	intergenic	PSMD3;CSF3	ALPL	1	21870381	0.379928	0.106702	0.00826076	3.62352e-38	0.00536435
	rs149007767	T	C	7	50370254	intronic	IKZF1	CSGALNACT1	8	19438606	0.149708	-0.145125	0.0114378	6.88354e-37	0.00536198
	rs2025151	G	C	9	99161512	intronic	ZNF367	KDM5B	1	202737562	0.200536	0.129305	0.00991269	6.83933e-39	0.00536109
	rs10512472	C	T	17	33884804	exonic	SLFN14	ABCC3	17	48740875	0.179037	0.134971	0.0103339	5.50728e-39	0.00535518
	rs149007767	T	C	7	50370254	intronic	IKZF1	RAB32	6	146870465	0.149708	-0.145031	0.0114379	7.64293e-37	0.00535508
	rs149110519	T	C	6	144385777	upstream	PLAGL1	SIGLEC7	19	51651169	0.0526158	0.23176	0.0196896	5.5264e-32	0.00535487
	rs2227901	A	G	4	57798189	exonic	REST	GDAP1	8	75317236	0.203258	0.12858	0.00991219	1.76598e-38	0.00535478
	rs56330463	T	C	5	148200011	intergenic	HTR4;ADRB2	FRAT2	10	99093356	0.417903	-0.104815	0.0080474	8.85484e-39	0.00534499
	rs12600856	C	T	17	38163295	intergenic	PSMD3;CSF3	FAM129A	1	184851770	0.379553	0.106528	0.00818423	9.89751e-39	0.00534479
	rs2746427	T	A	6	135669097	intronic	AHI1	TRAV2	14	22180805	0.451719	-0.103852	0.0155833	2.6593e-11	0.00534232
	rs342296	A	G	7	106372903	intergenic	CCDC71L;PIK3CG	MEIS1	2	66730792	0.441001	0.104082	0.0080264	1.87032e-38	0.00534114
	rs1354034	T	C	3	56849749	intronic	ARHGEF3	CMIP	16	81612071	0.381863	-0.106334	0.0082248	3.11228e-38	0.00533781
	rs56330463	T	C	5	148200011	intergenic	HTR4;ADRB2	VNN3	6	133049915	0.417903	0.104739	0.00804743	1.00279e-38	0.00533724
	rs6592965	A	G	7	50427982	intronic	IKZF1	FBXO7	22	32882740	0.449532	0.103847	0.00796446	7.36064e-39	0.00533717
	rs35033748	C	T	17	27179590	intergenic	FAM222B;ERAL1	RGS10	10	121280780	0.215702	-0.125593	0.0103725	9.5452e-34	0.00533701
	rs592423	A	C	6	139840693	intergenic	LINC01625;FILNC1	MCOLN1	19	7593203	0.467953	-0.103503	0.00795458	1.0498e-38	0.00533439
	rs592423	A	C	6	139840693	intergenic	LINC01625;FILNC1	RAP1GAP	1	21959254	0.467953	-0.103443	0.0079546	1.15804e-38	0.00532827
	rs6592965	A	G	7	50427982	intronic	IKZF1	JAZF1	7	28045277	0.449532	0.103742	0.00796451	8.75105e-39	0.00532643
	rs4917014	G	T	7	50305863	intergenic	SPATA48;IKZF1	HERC5	4	89402791	0.316454	-0.110904	0.00857068	2.67978e-38	0.00532109
	rs4328821	G	A	3	128316435	intergenic	LINC01565;RPN1	MS4A2	11	59859589	0.118714	-0.159459	0.0182563	2.44736e-18	0.00532045
	rs149110519	T	C	6	144385777	upstream	PLAGL1	LETM2	8	38255385	0.0526158	-0.230942	0.0307001	5.37386e-14	0.00531713
	rs11602954	A	G	11	202856	downstream	BET1L	45174	22	19707141	0.211758	0.126166	0.0107029	4.49569e-32	0.00531394
	rs13062095	C	T	3	101267385	intergenic	FAM172BP;TRMT10C	ZNF415	19	53623731	0.350092	0.10803	0.00832111	1.53577e-38	0.00531068
	rs149110519	T	C	6	144385777	upstream	PLAGL1	PXN	12	120675912	0.0526158	-0.230734	0.0307003	5.66072e-14	0.00530757
	rs8026803	C	T	15	80260014	exonic	BCL2A1	SFTPD	10	81719933	0.247924	-0.119292	0.0100121	9.91037e-33	0.00530682
	rs10512472	C	T	17	33884804	exonic	SLFN14	NEXN	1	78381889	0.179037	-0.134354	0.0103342	1.20912e-38	0.00530635
	rs56388170	T	G	7	28724374	intronic	CREB5	MME	3	154821705	0.289189	-0.113547	0.00878435	3.21095e-38	0.00530046
	rs1354034	T	C	3	56849749	intronic	ARHGEF3	FRMD3	9	86005683	0.381863	0.105957	0.00815998	1.49033e-38	0.00530003
	rs7950726	A	C	11	5225447	intergenic	OR51V1;HBB	RAD51C	17	56790818	0.130877	0.15247	0.0117474	1.60758e-38	0.00528867
	rs826415	G	T	1	118153977	intronic	TENT5C	NGFRAP1	X	102632136	0.308498	0.111298	0.0159295	2.81026e-12	0.00528502
	rs55793580	T	C	9	127009395	intergenic	LHX2;NEK6	TPPP3	16	67425575	0.169838	-0.136759	0.0105708	2.76841e-38	0.00527396
	rs7570971	A	C	2	135837906	intronic	RAB3GAP1	SHD	19	4284659	0.441154	-0.103383	0.00894898	7.17038e-31	0.00527001
	rs149007767	T	C	7	50370254	intronic	IKZF1	ALOX5AP	13	31324100	0.149708	-0.143793	0.0113976	1.72356e-36	0.00526401
	rs1354034	T	C	3	56849749	intronic	ARHGEF3	SNAP23	15	42810489	0.381863	-0.105559	0.00889876	1.86022e-32	0.00526031
	rs592423	A	C	6	139840693	intergenic	LINC01625;FILNC1	FOXO4	X	70319716	0.467953	0.102725	0.0147453	3.24692e-12	0.00525452
	rs9376092	A	C	6	135427144	intergenic	HBS1L;MYB	DNAJB2	2	220147805	0.27571	-0.114697	0.00892044	7.77584e-38	0.00525413
	rs7950726	A	C	11	5225447	intergenic	OR51V1;HBB	TMEM63B	6	44108953	0.130877	0.151958	0.012819	2.04914e-32	0.00525317
	rs1354034	T	C	3	56849749	intronic	ARHGEF3	CLCN3	4	170589304	0.381863	-0.105487	0.00815502	2.84881e-38	0.00525314
	rs17655730	C	T	11	270715	intergenic	PSMD13;NLRP6	LY6G6F	6	31680110	0.234959	0.120879	0.0139283	4.00318e-18	0.00525304
	rs1532331	G	T	5	43116830	intergenic	LOC100506639;ZNF131	METTL4	18	2554516	0.316115	0.110029	0.00852141	3.84665e-38	0.00523449
	rs7911264	T	C	10	94436851	intergenic	KIF11;HHEX	HOXB2	17	46620848	0.484777	0.102359	0.00792788	3.88683e-38	0.00523385
	rs78909033	A	G	2	241510903	intronic	RNPEPL1	SPOCD1	1	32268837	0.114954	-0.160312	0.0136783	1.00435e-31	0.00522942
	rs56330463	T	C	5	148200011	intergenic	HTR4;ADRB2	FCGR1B	1	120931458	0.417903	-0.103605	0.0178448	6.40212e-09	0.00522231
	rs114694170	C	T	5	88180196	ncRNA_intronic	MEF2C-AS1	HGD	3	120374219	0.0523176	-0.229471	0.0201361	4.37775e-30	0.00522151
	rs1354034	T	C	3	56849749	intronic	ARHGEF3	RHOBTB1	10	62695197	0.381863	-0.10515	0.0082537	3.55304e-37	0.00521969
	rs79755767	A	G	12	54698408	intergenic	NFE2;COPZ1	AQP10	1	154295683	0.0977363	0.172014	0.0135922	1.04575e-36	0.0052185
	rs10852622	G	A	16	88556880	intronic	ZFPM1	HGD	3	120374219	0.293204	0.112167	0.0127179	1.14869e-18	0.00521462
	rs57228624	C	T	19	836149	intergenic	AZU1;PRTN3	MPO	17	56352756	0.228262	-0.121648	0.0142361	1.28536e-17	0.00521363
	rs8026803	C	T	15	80260014	exonic	BCL2A1	TCF7L2	10	114818723	0.247924	-0.118212	0.00917572	5.60386e-38	0.00521113
	rs1375493	G	A	2	182323766	intronic	ITGA4	LTF	3	46501930	0.434923	-0.102942	0.00800683	7.87707e-38	0.00520879
	rs149007767	T	C	7	50370254	intronic	IKZF1	DLEU7	13	51351609	0.149708	-0.14303	0.011398	4.0409e-36	0.00520829
	rs57228624	C	T	19	836149	intergenic	AZU1;PRTN3	DEFA4	8	6794602	0.228262	-0.121579	0.0221213	3.88503e-08	0.00520775
	rs56388170	T	G	7	28724374	intronic	CREB5	PROK2	3	71827582	0.289189	-0.112533	0.00878477	1.44135e-37	0.00520624
	rs12478601	C	T	2	43721508	intronic	THADA	CYP1B1	2	38315580	0.425396	0.10313	0.00806306	1.85517e-37	0.00519948
	rs6084653	G	C	20	4157072	intronic	SMOX	RPS12	6	133137141	0.36636	-0.105759	0.0182674	7.05963e-09	0.005193
	rs56330463	T	C	5	148200011	intergenic	HTR4;ADRB2	CDC42EP3	2	37917321	0.417903	-0.103232	0.00804804	1.1576e-37	0.0051848
	rs55793580	T	C	9	127009395	intergenic	LHX2;NEK6	MTX1	1	155181052	0.169838	-0.135588	0.0234399	7.27283e-09	0.00518408
	rs8067378	A	G	17	38051348	intergenic	ZPBP2;GSDMB	XCL2	1	168511619	0.502612	0.101763	0.0176032	7.4302e-09	0.00517766
	rs149007767	T	C	7	50370254	intronic	IKZF1	GRN	17	42426542	0.149708	-0.142604	0.0113981	6.48373e-36	0.00517737
	rs1265564	C	A	12	111708458	intronic	CUX2	FCGR1C	1	149349403	0.421923	0.103004	0.0178216	7.48339e-09	0.00517552
	rs149110519	T	C	6	144385777	upstream	PLAGL1	RAB40C	16	659314	0.0526158	0.227803	0.0220919	6.24528e-25	0.00517358
	rs1354034	T	C	3	56849749	intronic	ARHGEF3	ENSG00000182747	6	137245089	0.381863	-0.104585	0.00911714	1.84089e-30	0.00516365
	rs10176176	T	A	2	85762048	intergenic	SH2D6;PARTICL	RP13-104F24.3	17	62746983	0.478292	-0.10162	0.0160267	2.28724e-10	0.00515362
	rs2950390	T	C	12	57055291	intergenic	ATP5F1B;PTGES3	ENKUR	10	25287996	0.319647	-0.108822	0.00850189	1.64586e-37	0.00515069
	rs6592965	A	G	7	50427982	intronic	IKZF1	GCAT	22	38208547	0.449532	-0.101979	0.00796523	1.57738e-37	0.00514686
	rs11602954	A	G	11	202856	downstream	BET1L	MGLL	3	127474980	0.211758	0.124094	0.0106835	3.43771e-31	0.0051408
	rs4917014	G	T	7	50305863	intergenic	SPATA48;IKZF1	IFI6	1	27995650	0.316454	-0.109	0.00857146	4.7822e-37	0.00513996
	rs597808	G	A	12	111973358	intronic	ATXN2	CRIP1	14	105953969	0.52377	0.10148	0.0131709	1.30946e-14	0.00513748
	rs225245	G	A	17	33946107	intronic	AP2B1	GBGT1	9	136033836	0.440335	-0.102033	0.00802341	4.76388e-37	0.00513123
	rs17342717	T	C	6	25821770	intronic	SLC17A1	ALAS2	X	55046492	0.0753918	-0.191743	0.0278688	5.97686e-12	0.00512565
	rs3733018	A	C	3	187456594	intronic	BCL6	TMOD2	15	52076161	0.35857	-0.105555	0.00914397	7.94334e-31	0.00512522
	rs56378716	G	A	17	56356502	exonic	MPO	CALR	19	13052347	0.0168293	-0.393363	0.0369165	1.64359e-26	0.0051205
	rs79755767	A	G	12	54698408	intergenic	NFE2;COPZ1	PCSK1N	X	48691769	0.0977363	-0.170359	0.0259714	5.39885e-11	0.00511859
	rs1532331	G	T	5	43116830	intergenic	LOC100506639;ZNF131	SPATA7	14	88893981	0.316115	-0.108736	0.00859522	1.10741e-36	0.0051122
	rs56388170	T	G	7	28724374	intronic	CREB5	PI3	20	43804351	0.289189	0.111505	0.00878518	6.51581e-37	0.00511158
	rs35979828	T	C	12	54685880	downstream	NFE2	SHKBP1	19	41090031	0.0571059	-0.217542	0.0175968	4.16465e-35	0.00509636
	rs1354034	T	C	3	56849749	intronic	ARHGEF3	AGPAT1	6	32140931	0.381863	-0.103884	0.0121555	1.27208e-17	0.00509468
	rs116139393	G	C	7	6771660	intergenic	ZNF12;PMS2CL	PI3	20	43804351	0.167132	0.135224	0.0106397	5.24352e-37	0.00509064
	rs149007767	T	C	7	50370254	intronic	IKZF1	MPP1	X	154028120	0.149708	0.141398	0.0220672	1.47828e-10	0.00509014
	rs56388170	T	G	7	28724374	intronic	CREB5	PELI1	2	64345687	0.289189	0.111239	0.00878529	9.60215e-37	0.00508725
	rs35033748	C	T	17	27179590	intergenic	FAM222B;ERAL1	DNAJB2	2	220147805	0.215702	0.122607	0.0103738	3.1174e-32	0.00508622
	rs4895441	G	A	6	135426573	intergenic	HBS1L;MYB	ROGDI	16	4849960	0.273956	-0.113068	0.00893889	1.13308e-36	0.00508573
	rs1799964	C	T	6	31542308	downstream	LTA	TRAV23DV6	14	22554961	0.21726	-0.122237	0.0196564	5.01291e-10	0.00508198
	rs11653357	A	G	17	33923607	intronic	AP2B1	RPS10	6	34389566	0.17703	0.132011	0.0232144	1.29594e-08	0.00507784
	rs259964	A	G	20	57824309	intronic	ZNF831	PHYH	10	13332104	0.448694	0.101269	0.00796689	5.1242e-37	0.00507369
	rs11066301	G	A	12	112871372	intronic	PTPN11	GBP1	1	89524522	0.400736	0.102773	0.00817833	3.22696e-36	0.005073
	rs8073060	A	T	17	33875262	exonic	SLFN14	BPGM	7	134348062	0.305723	-0.109257	0.00866919	2.03521e-36	0.00506744
	rs6084653	G	C	20	4157072	intronic	SMOX	GYPC	2	127433877	0.36636	-0.104436	0.00823904	8.05328e-37	0.0050639
	rs8026803	C	T	15	80260014	exonic	BCL2A1	CYP4F22	19	15641215	0.247924	-0.116503	0.00917641	6.23095e-37	0.00506155
	rs1354034	T	C	3	56849749	intronic	ARHGEF3	ST7	7	116731724	0.381863	-0.103512	0.00815582	6.56592e-37	0.00505829
	rs7570971	A	C	2	135837906	intronic	RAB3GAP1	LEPREL1	3	189757371	0.441154	-0.101264	0.00894995	1.11235e-29	0.0050562
	rs913672	G	T	20	48906967	intergenic	PELATON;LINC01270	MS4A7	11	60154689	0.340707	0.106019	0.00837579	1.01298e-36	0.0050496
	rs8082605	T	G	17	33864771	UTR5	SLFN12L	VWCE	11	61044329	0.0436372	0.245882	0.0199883	8.9128e-35	0.0050462
	rs8073060	A	T	17	33875262	exonic	SLFN14	ST3GAL1	8	134525637	0.305723	0.108938	0.00866932	3.25154e-36	0.00503788
	rs149110519	T	C	6	144385777	upstream	PLAGL1	CDS2	20	5142982	0.0526158	-0.224781	0.0197751	6.11199e-30	0.00503725
	rs12973620	C	G	19	58249643	intergenic	ZNF671;ZNF776	RAPGEF2	4	160153325	0.191043	0.127641	0.0111096	1.49317e-30	0.00503582
	rs2158799	C	G	7	28277107	ncRNA_intronic	JAZF1-AS1	DDX5	17	62500025	0.374155	0.103654	0.0122046	2.0137e-17	0.00503177
	rs6592965	A	G	7	50427982	intronic	IKZF1	EIF3B	7	2407050	0.449532	0.10079	0.0079657	1.07683e-36	0.00502757
	rs11553699	G	A	12	122216910	UTR3	RHOF;TMEM120B	ITGA2B	17	42458210	0.10963	0.160339	0.0130741	1.41521e-34	0.00501889
	rs35979828	T	C	12	54685880	downstream	NFE2	PI3	20	43804351	0.0571059	-0.215831	0.0175975	1.39785e-34	0.00501653
	rs149110519	T	C	6	144385777	upstream	PLAGL1	LRP3	19	33683601	0.0526158	0.224258	0.0197753	8.28599e-30	0.00501382
	rs149604913	C	T	10	45995006	intronic	MARCHF8	ADORA1	1	203098157	0.0192548	0.363854	0.0323293	2.19821e-29	0.00500011
	rs13103322	G	A	4	83895232	intronic	LIN54	HIST1H3H	6	27778078	0.190299	-0.127364	0.0108367	6.81554e-32	0.004999
	rs1354034	T	C	3	56849749	intronic	ARHGEF3	RGS10	10	121280780	0.381863	-0.102901	0.00815606	1.71265e-36	0.00499875
	rs57994353	C	T	9	139356987	intronic	SEC16A	IFIT1	10	91158024	0.294804	-0.109591	0.00936531	1.24778e-31	0.00499371
	rs7911264	T	C	10	94436851	intergenic	KIF11;HHEX	NDFIP2	13	80092748	0.484777	0.099925	0.00792886	2.04038e-36	0.00498788
	rs8073060	A	T	17	33875262	exonic	SLFN14	VWF	12	6145988	0.305723	0.10837	0.00866955	7.45574e-36	0.00498552
	rs516805	G	T	6	122719631	intergenic	GJA1;HSF2	HSPH1	13	31723643	0.303813	-0.108467	0.00863187	3.25154e-36	0.00497691
	rs149110519	T	C	6	144385777	upstream	PLAGL1	TPST1	7	65777858	0.0526158	0.223399	0.0196933	7.95199e-30	0.00497547
	rs3896594	G	T	2	8762414	intergenic	LINC01814;ID2-AS1	PLEK2	14	67866308	0.377086	-0.102883	0.00819102	3.48126e-36	0.00497265
	rs55793580	T	C	9	127009395	intergenic	LHX2;NEK6	TSPAN2	1	115611376	0.169838	-0.132777	0.0105791	3.93017e-36	0.00497136
	rs9480866	T	C	6	108962642	intronic	FOXO3	MEGF6	1	3467271	0.160953	0.135634	0.020024	1.25617e-11	0.00496884
	rs55908509	A	G	19	16442019	intergenic	KLF2;EPS15L1	LIM2	19	51887188	0.3284	0.106074	0.0188686	1.89087e-08	0.00496317
	rs8073060	A	T	17	33875262	exonic	SLFN14	HBD	11	5255254	0.305723	-0.108122	0.00873971	3.73258e-35	0.00496275
	rs7245983	C	A	19	19657632	downstream	CILP2	RUNDC3A	17	42390910	0.334811	-0.105533	0.00842341	5.20738e-36	0.00496084
	rs705705	C	G	12	56435504	upstream	RPS26	ENSG00000236058	10	120631837	0.307877	-0.107878	0.0141156	2.13044e-14	0.00495973
	rs3896594	G	T	2	8762414	intergenic	LINC01814;ID2-AS1	ITLN1	1	160850644	0.377086	-0.102739	0.0121861	3.4331e-17	0.0049587
	rs13062095	C	T	3	101267385	intergenic	FAM172BP;TRMT10C	ZFP82	19	36891790	0.350092	0.104349	0.0083226	4.62521e-36	0.00495494
	rs8078723	C	T	17	38166879	intergenic	PSMD3;CSF3	ADM	11	10327585	0.379928	0.102506	0.00816424	3.70831e-36	0.00495077
	rs56330463	T	C	5	148200011	intergenic	HTR4;ADRB2	GPR97	16	57713037	0.417903	0.100847	0.008049	5.17466e-36	0.00494794
	rs1354034	T	C	3	56849749	intronic	ARHGEF3	DAB2	5	39417091	0.381863	-0.102336	0.00893618	2.30047e-30	0.00494403
	rs6592965	A	G	7	50427982	intronic	IKZF1	HBM	16	210329	0.449532	0.0999008	0.0080571	2.64275e-35	0.00493925
	rs7785014	T	C	7	137881690	intergenic	MIR4468;TRIM24	CREB5	7	28602225	0.331668	-0.105535	0.00847631	1.38798e-35	0.00493764
	rs1012068	G	T	22	32265903	intronic	DEPDC5	DEFA4	8	6794602	0.276034	-0.111144	0.0164611	1.45921e-11	0.00493721
	rs1292053	G	A	17	57963537	exonic	TUBD1	TGFBI	5	135382045	0.453041	-0.0998025	0.00800926	1.21986e-35	0.00493634
	rs35033748	C	T	17	27179590	intergenic	FAM222B;ERAL1	GPR146	7	1091554	0.215702	-0.120688	0.0103746	2.80078e-31	0.00492826
	rs141094656	C	T	1	92753336	intronic	GLMN	TRIM7	5	180626608	0.0195137	-0.358789	0.034674	4.29556e-25	0.00492595
	rs111778408	A	G	14	35572163	ncRNA_intronic	LOC101927178	KLHL5	4	39087568	0.100785	-0.164847	0.0134906	2.44885e-34	0.00492552
	rs11602954	A	G	11	202856	downstream	BET1L	SLC24A3	20	19448435	0.211758	0.121414	0.0106847	6.36195e-30	0.00492116
	rs2227901	A	G	4	57798189	exonic	REST	PAQR4	16	3021368	0.203258	0.123255	0.00984717	6.04224e-36	0.00492045
	rs12589699	G	A	14	69212885	intergenic	RAD51B;ZFP36L1	TNFSF4	1	173164662	0.127908	-0.148246	0.0119053	1.36213e-35	0.00490291
	rs12485444	T	A	3	188135783	intronic	LPP	CKB	14	103987722	0.490804	0.0990322	0.007983	2.4429e-35	0.00490203
	rs149007767	T	C	7	50370254	intronic	IKZF1	MICU1	10	74256498	0.149708	0.138743	0.0127396	1.27655e-27	0.0049008
	rs2227901	A	G	4	57798189	exonic	REST	MAPRE3	2	27221772	0.203258	0.122997	0.00984727	8.41233e-36	0.00489989
	rs149110519	T	C	6	144385777	upstream	PLAGL1	CASP5	11	104879428	0.0526158	-0.221529	0.0196941	2.35564e-29	0.00489255
	rs505404	G	T	11	243268	intronic	PSMD13	TREML1	6	41119577	0.222031	0.118963	0.00955218	1.33008e-35	0.00488909
	rs149007767	T	C	7	50370254	intronic	IKZF1	POLB	8	42212649	0.149708	0.138545	0.0113998	5.5096e-34	0.00488682
	rs1354034	T	C	3	56849749	intronic	ARHGEF3	TMEM140	7	134841737	0.381863	0.101733	0.00815653	1.05332e-35	0.00488593
	rs11065979	T	C	12	112059557	intergenic	ATXN2-AS;BRAP	LRRFIP1	2	238629272	0.418831	-0.100141	0.0133345	5.91725e-14	0.00488198
	rs17081935	T	C	4	57823476	intergenic	REST;NOA1	CLEC10A	17	6980741	0.202608	0.122916	0.0099535	4.93207e-35	0.00488173
	rs1354034	T	C	3	56849749	intronic	ARHGEF3	SCFD2	4	53985695	0.381863	-0.101687	0.00815655	1.13143e-35	0.00488148
	rs13289095	T	G	9	131466489	intronic	PKN3	MS4A3	11	59831330	0.119513	0.152277	0.014246	1.14476e-26	0.00488022
	rs1354034	T	C	3	56849749	intronic	ARHGEF3	HIST1H2BJ	6	27097299	0.381863	0.10167	0.0151466	1.91449e-11	0.00487989
	rs653178	T	C	12	112007756	intronic	ATXN2	UBE2L6	11	57327443	0.539991	-0.0991079	0.00839556	3.68667e-32	0.00487977
	rs1354034	T	C	3	56849749	intronic	ARHGEF3	MFSD1	3	158498747	0.381863	-0.101662	0.00815655	1.17482e-35	0.00487915
	rs1728785	A	C	16	68591230	intronic	ZFP90	CDCA7L	7	21963110	0.219628	0.119285	0.00968169	7.00833e-35	0.00487744
	rs7570971	A	C	2	135837906	intronic	RAB3GAP1	PACSIN1	6	34468461	0.441154	-0.0994028	0.00895077	1.17955e-28	0.00487203
	rs141094656	C	T	1	92753336	intronic	GLMN	PRKCDBP	11	6341026	0.0195137	-0.356565	0.0396355	2.33878e-19	0.00486505
	rs1354034	T	C	3	56849749	intronic	ARHGEF3	MFAP3L	4	170930965	0.381863	-0.101481	0.00815663	1.5536e-35	0.00486179
	rs6084653	G	C	20	4157072	intronic	SMOX	ZMAT2	5	140082256	0.36636	0.1023	0.00823989	2.16146e-35	0.00485883
	rs77526211	A	G	13	40974023	ncRNA_intronic	LINC00598	LETM2	8	38255385	0.0432109	-0.242363	0.0290481	7.21234e-17	0.00485703
	rs592423	A	C	6	139840693	intergenic	LINC01625;FILNC1	RANBP10	16	67798780	0.467953	-0.0987553	0.00805259	1.41696e-34	0.00485628
	rs8026803	C	T	15	80260014	exonic	BCL2A1	TNFRSF8	1	12163849	0.247924	-0.114046	0.00917739	1.8697e-35	0.00485028
	rs3774937	C	T	4	103434253	intronic	NFKB1	SQSTM1	5	179249233	0.320593	0.105504	0.0085356	4.27489e-35	0.00484902
	rs1870028	T	C	7	50258313	intergenic	SPATA48;IKZF1	DSC2	18	28664159	0.0779871	-0.183451	0.0149068	8.35693e-35	0.00483982
	rs9420589	T	G	10	94450233	intronic	HHEX	FEZ1	11	125340929	0.428682	0.0993929	0.00803304	3.65895e-35	0.00483898
	rs532098	A	G	6	32578052	intergenic	HLA-DRB1;HLA-DQA1	ZNF672	1	249138062	0.420328	0.0996399	0.00802835	2.2779e-35	0.00483802
	rs2227901	A	G	4	57798189	exonic	REST	GPHN	14	67311322	0.203258	0.122173	0.00984759	2.41259e-35	0.00483445
	rs2523590	C	T	6	31327064	intergenic	HLA-B;MICA-AS1	NMT1	17	43157681	0.286081	-0.10879	0.00976912	8.37051e-29	0.00483442
	rs149007767	T	C	7	50370254	intronic	IKZF1	RETN	19	7734632	0.149708	-0.137782	0.0114001	1.25237e-33	0.00483311
	rs1050316	G	T	1	156434703	UTR3	MEF2D	CALD1	7	134542241	0.337362	0.103936	0.00838691	2.86241e-35	0.0048299
	rs149007767	T	C	7	50370254	intronic	IKZF1	VSIG10	12	118537614	0.149708	-0.137672	0.0114002	1.40919e-33	0.00482539
	rs597808	G	A	12	111973358	intronic	ATXN2	GVINP1	11	6751620	0.52377	-0.0983234	0.0176261	2.42881e-08	0.00482282
	rs149007767	T	C	7	50370254	intronic	IKZF1	MEGF9	9	123419919	0.149708	-0.137606	0.011441	2.54758e-33	0.00482079
	rs56388170	T	G	7	28724374	intronic	CREB5	DYSF	2	71797375	0.289189	-0.108256	0.00878648	6.99964e-35	0.00481807
	rs8073060	A	T	17	33875262	exonic	SLFN14	PTGS1	9	125145403	0.305723	0.106523	0.00867028	1.07705e-34	0.00481702
	rs35979828	T	C	12	54685880	downstream	NFE2	CTSA	20	44523525	0.0571059	-0.211492	0.0175993	2.88935e-33	0.00481684
	rs11881751	A	G	19	4997420	intronic	KDM4B	KATNBL1	15	34467586	0.231675	0.116175	0.0104549	1.09675e-28	0.00480482
	rs6986779	T	C	8	142337790	intergenic	SLC45A4;LINC01300	C10orf105	10	73484519	0.349935	-0.102714	0.0138285	1.10502e-13	0.00479989
	rs1354034	T	C	3	56849749	intronic	ARHGEF3	RNF11	1	51720535	0.381863	-0.100724	0.00816208	5.48144e-35	0.00478949
	rs10512472	C	T	17	33884804	exonic	SLFN14	TNFSF4	1	173164662	0.179037	-0.127623	0.010372	8.55592e-35	0.004788
	rs12480732	T	C	20	31191015	ncRNA_intronic	NOL4L-DT	TP53I3	2	24304517	0.25385	-0.112315	0.00915355	1.31091e-34	0.00477869
	rs11602954	A	G	11	202856	downstream	BET1L	C12orf39	12	21684776	0.211758	0.119589	0.0189876	3.00928e-10	0.00477436
	rs11587735	C	A	1	118153011	intronic	TENT5C	ALAS2	X	55046492	0.173499	-0.128983	0.0194342	3.20349e-11	0.00477125
	rs149007767	T	C	7	50370254	intronic	IKZF1	LRMP	12	25217602	0.149708	0.136843	0.0114005	3.41407e-33	0.00476751
	rs28453840	G	A	2	136522941	intronic	UBXN4	LEPREL1	3	189757371	0.31882	-0.104759	0.00938314	6.07641e-29	0.00476673
	rs149007767	T	C	7	50370254	intronic	IKZF1	CCNY	10	35698402	0.149708	-0.136779	0.0114005	3.65749e-33	0.004763
	rs629326	G	T	6	159496713	intergenic	TAGAP;LOC101929122	CAMP	3	48265909	0.37219	0.10088	0.0082134	1.12607e-34	0.00475593
	rs3774937	C	T	4	103434253	intronic	NFKB1	TTC25	17	40102268	0.320593	0.104443	0.00850704	1.20083e-34	0.00475192
	rs149007767	T	C	7	50370254	intronic	IKZF1	UBR2	6	42596521	0.149708	0.136611	0.0172746	2.61137e-15	0.00475133
	rs10774624	A	G	12	111833788	intergenic	PHETA1;SH2B3	VIM	10	17274925	0.538565	0.0977723	0.0131978	1.28025e-13	0.00475128
	rs12485444	T	A	3	188135783	intronic	LPP	NRG1	8	32059725	0.490804	-0.0973734	0.00798365	3.24075e-34	0.00473918
	rs28453840	G	A	2	136522941	intronic	UBXN4	DNASE1L3	3	58189204	0.31882	-0.104445	0.0158656	4.60739e-11	0.0047382
	rs17696736	G	A	12	112486818	intronic	NAA25	MTX1	1	155181052	0.408694	-0.0989688	0.017908	3.26682e-08	0.00473409
	rs505404	G	T	11	243268	intronic	PSMD13	GUCY1B3	4	156704443	0.222031	0.116988	0.00955295	1.75837e-34	0.00472814
	rs4917014	G	T	7	50305863	intergenic	SPATA48;IKZF1	ENSG00000101440	20	32819762	0.316454	-0.104526	0.00962213	1.72782e-27	0.0047267
	rs6084653	G	C	20	4157072	intronic	SMOX	CA1	8	86265540	0.36636	0.100733	0.00824051	2.31127e-34	0.0047111
	rs149110519	T	C	6	144385777	upstream	PLAGL1	ARHGAP1	11	46710397	0.0526158	0.217273	0.0200752	2.67863e-27	0.00470636
	rs78744187	T	C	19	33754548	intergenic	SLC7A10;CEBPA	AKAP12	6	151620413	0.0806295	-0.178143	0.0169213	6.43885e-26	0.0047049
	rs2239630	A	G	14	23589349	upstream	CEBPE	STAB1	3	52543932	0.480827	-0.0970744	0.00797365	4.25512e-34	0.00470479
	rs78744187	T	C	19	33754548	intergenic	SLC7A10;CEBPA	SLC45A3	1	205638283	0.0806295	-0.178077	0.0168447	4.0312e-26	0.00470141
	rs1847472	A	C	6	90973159	intronic	BACH2	HBG1	11	5270217	0.323127	0.103664	0.0188244	3.65208e-08	0.00470073
	rs2285803	T	C	6	31107258	intronic	PSORS1C1	TRAV12-2	14	22356359	0.322765	-0.103538	0.0173399	2.35659e-09	0.0046866
	rs9399137	C	T	6	135419018	intergenic	HBS1L;MYB	GUCD1	22	24944154	0.264393	-0.109764	0.0100025	5.11927e-28	0.00468643
	rs8026803	C	T	15	80260014	exonic	BCL2A1	LYPD2	8	143832760	0.247924	-0.112095	0.00917815	2.63961e-34	0.00468583
	rs8073060	A	T	17	33875262	exonic	SLFN14	NT5M	17	17228813	0.305723	0.105041	0.00867086	8.87183e-34	0.00468395
	rs11604127	T	C	11	196944	UTR5	ODF3	TUBA1C	12	49624816	0.211394	0.118508	0.0123046	5.9036e-22	0.00468254
	rs10876550	G	A	12	54712308	intergenic	NFE2;COPZ1	HGD	3	120374219	0.409936	0.0983599	0.00882872	7.93137e-29	0.00468038
	rs11212617	C	A	11	108283161	intronic	C11orf65	HIST2H2BE	1	149857121	0.434293	0.0975899	0.0119172	2.63406e-16	0.00467965
	rs1800973	A	C	12	69744014	exonic	LYZ	ZNF131	5	43128700	0.0661727	0.19449	0.0168359	7.20384e-31	0.00467487
	rs141094656	C	T	1	92753336	intronic	GLMN	LILRA3	19	54804903	0.0195137	0.349472	0.0455564	1.70395e-14	0.00467345
	rs149007767	T	C	7	50370254	intronic	IKZF1	TPST1	7	65777858	0.149708	-0.13541	0.0114011	1.55861e-32	0.00466817
	rs149110519	T	C	6	144385777	upstream	PLAGL1	TBC1D10C	11	67174473	0.0526158	0.216324	0.0219828	7.52606e-23	0.00466533
	rs3732378	A	G	3	39307162	exonic	CX3CR1	LYPD2	8	143832760	0.165434	-0.129946	0.0107314	9.46409e-34	0.00466275
	rs3094006	T	C	6	31461558	ncRNA_intronic	MICB-DT	XRCC6	22	42038583	0.287355	-0.106697	0.010382	8.93764e-25	0.00466254
	rs149110519	T	C	6	144385777	upstream	PLAGL1	HCAR2	12	123186865	0.0526158	-0.216063	0.0224888	7.42597e-22	0.00465409
	rs56330463	T	C	5	148200011	intergenic	HTR4;ADRB2	ST3GAL6	3	98495562	0.417903	-0.0977818	0.0080502	5.98743e-34	0.00465175
	rs145171343	T	C	17	33886764	UTR5	SLFN14	TREML1	6	41119577	0.0138172	0.413041	0.0418494	5.63328e-23	0.00464938
	rs7606173	C	G	2	60725451	intronic	BCL11A	PPP2R5B	11	64693486	0.393094	-0.0986409	0.00815666	1.1459e-33	0.00464261
	rs13289095	T	G	9	131466489	intronic	PKN3	RNASE3	14	21360032	0.119513	0.148448	0.0142478	2.03077e-25	0.00463783
	rs11066301	G	A	12	112871372	intronic	PTPN11	FCGR1B	1	120931458	0.400736	0.0982651	0.0179654	4.50798e-08	0.00463773
	rs913678	C	T	20	48955424	intergenic	LINC01271;PTPN1	MS4A14	11	60165582	0.306921	-0.104405	0.00944524	2.10362e-28	0.00463747
	rs149007767	T	C	7	50370254	intronic	IKZF1	ARAP3	5	141047378	0.149708	0.134883	0.0114013	2.7152e-32	0.00463186
	rs41294858	C	T	6	135412636	intergenic	HBS1L;MYB	TMEM158	3	45266864	0.102935	-0.158327	0.0130426	6.54629e-34	0.0046294
	rs149007767	T	C	7	50370254	intronic	IKZF1	ATP7A	X	77236043	0.149708	0.134796	0.0220724	1.01521e-09	0.00462591
	rs8073060	A	T	17	33875262	exonic	SLFN14	HEMGN	9	100698105	0.305723	-0.104383	0.00870102	3.70194e-33	0.00462538
	rs149110519	T	C	6	144385777	upstream	PLAGL1	HCAR3	12	123200371	0.0526158	-0.21532	0.0224892	1.0245e-21	0.00462213
	rs56330463	T	C	5	148200011	intergenic	HTR4;ADRB2	PTGS2	1	186645241	0.417903	0.0974524	0.00807775	1.63043e-33	0.00462047
	rs505404	G	T	11	243268	intronic	PSMD13	CTTN	11	70263600	0.222031	0.115646	0.00955347	9.92484e-34	0.00462024
	rs111778408	A	G	14	35572163	ncRNA_intronic	LOC101927178	RELB	19	45523070	0.100785	-0.159574	0.0134927	2.84092e-32	0.00461546
	rs6592965	A	G	7	50427982	intronic	IKZF1	SESN3	11	94932204	0.449532	0.0965659	0.00796736	8.25574e-34	0.00461499
	rs1354034	T	C	3	56849749	intronic	ARHGEF3	SLC8A3	14	70583360	0.381863	-0.0988633	0.00815764	8.36729e-34	0.00461416
	rs668887	G	A	6	139835780	intergenic	LINC01625;FILNC1	GATA1	X	48648840	0.0358112	0.25848	0.0396077	6.75493e-11	0.00461386
	rs17696736	G	A	12	112486818	intronic	NAA25	FCGR1B	1	120931458	0.408694	0.0976765	0.0179091	4.92492e-08	0.00461127
	rs149110519	T	C	6	144385777	upstream	PLAGL1	SIPA1L2	1	232615507	0.0526158	-0.215061	0.0196969	9.4036e-28	0.00461099
	rs141094656	C	T	1	92753336	intronic	GLMN	SLC24A4	14	92875760	0.0195137	0.347107	0.0346795	1.39152e-23	0.00461039
	rs149007767	T	C	7	50370254	intronic	IKZF1	CEP63	3	134249222	0.149708	0.134439	0.0114014	4.32294e-32	0.00460143
	rs8073060	A	T	17	33875262	exonic	SLFN14	FUNDC2	X	154271416	0.305723	0.104105	0.0128218	4.68494e-16	0.00460081
	rs11212617	C	A	11	108283161	intronic	C11orf65	HIST1H2BK	6	27110346	0.434293	0.0967601	0.00804497	2.55067e-33	0.00460041
	rs1991866	G	C	8	130624105	ncRNA_intronic	CCDC26	CACNA2D3	3	54632579	0.417571	0.0972085	0.00805133	1.45622e-33	0.00459634
	rs35979828	T	C	12	54685880	downstream	NFE2	RIT1	1	155874397	0.0571059	-0.20651	0.025457	4.97523e-16	0.00459258
	rs145171343	T	C	17	33886764	UTR5	SLFN14	TSPAN9	12	3291125	0.0138172	0.410484	0.0418506	1.03701e-22	0.00459197
	rs1354034	T	C	3	56849749	intronic	ARHGEF3	RAB4A	1	229424231	0.381863	-0.0986021	0.00890175	1.62761e-28	0.00458981
	rs145171343	T	C	17	33886764	UTR5	SLFN14	NRGN	11	124613849	0.0138172	0.410296	0.0418507	1.08428e-22	0.00458778
	rs56388170	T	G	7	28724374	intronic	CREB5	RP11-321E2.4	5	17464087	0.289189	0.105635	0.0104514	5.13303e-24	0.00458751
	rs11553699	G	A	12	122216910	UTR3	RHOF;TMEM120B	GNG11	7	93553421	0.10963	0.153158	0.0130303	6.73534e-32	0.0045794
	rs8082605	T	G	17	33864771	UTR5	SLFN12L	MICAL2	11	12200438	0.0436372	0.23417	0.0289164	5.57783e-16	0.00457693
	rs8073060	A	T	17	33875262	exonic	SLFN14	GNAS	20	57450510	0.305723	0.1038	0.00867134	5.0722e-33	0.00457391
	rs12478601	C	T	2	43721508	intronic	THADA	PNKD	2	219173315	0.425396	-0.0966474	0.00809334	7.1828e-33	0.00456638
	rs424971	C	T	16	85946450	intronic	IRF8	CYBB	X	37655989	0.421674	-0.0967589	0.0149041	8.4648e-11	0.00456627
	rs10512472	C	T	17	33884804	exonic	SLFN14	POLL	10	103343333	0.179037	0.124603	0.010338	1.87244e-33	0.00456411
	rs13062095	C	T	3	101267385	intergenic	FAM172BP;TRMT10C	LDHD	16	75148213	0.350092	-0.100133	0.00832424	2.4987e-33	0.00456267
	rs12153855	C	T	6	32074804	intronic	TNXB	TRAV12-3	14	22433985	0.104023	-0.156363	0.0265567	3.91134e-09	0.0045575
	rs56388170	T	G	7	28724374	intronic	CREB5	TGM3	20	2299185	0.289189	-0.105271	0.00878764	4.55609e-33	0.00455596
	rs8073060	A	T	17	33875262	exonic	SLFN14	NEXN	1	78381889	0.305723	-0.103563	0.00867143	7.06289e-33	0.00455302
	rs114694170	C	T	5	88180196	ncRNA_intronic	MEF2C-AS1	TMEM158	3	45266864	0.0523176	0.214187	0.0182833	1.06917e-31	0.00454912
	rs826415	G	T	1	118153977	intronic	TENT5C	ITGA2B	17	42458210	0.308498	0.1032	0.0086262	5.51194e-33	0.00454401
	rs6592965	A	G	7	50427982	intronic	IKZF1	SLC6A9	1	44477155	0.449532	0.0958069	0.00796764	2.64182e-33	0.00454273
	rs592423	A	C	6	139840693	intergenic	LINC01625;FILNC1	XK	X	37568197	0.467953	-0.0955043	0.0147506	9.50634e-11	0.0045418
	rs149110519	T	C	6	144385777	upstream	PLAGL1	BRAT1	7	2586436	0.0526158	0.213403	0.0227792	7.37101e-21	0.00454017
	rs149110519	T	C	6	144385777	upstream	PLAGL1	CD300LF	17	72699784	0.0526158	0.213399	0.01978	3.8968e-27	0.00454
	rs149007767	T	C	7	50370254	intronic	IKZF1	BCKDK	16	31120769	0.149708	-0.133516	0.0114018	1.13146e-31	0.00453849
	rs11065979	T	C	12	112059557	intergenic	ATXN2-AS;BRAP	RFX2	19	6096379	0.418831	-0.0965537	0.00851474	8.35254e-30	0.00453847
	rs1265564	C	A	12	111708458	intronic	CUX2	GBP2	1	89593977	0.421923	0.0964117	0.00808227	8.37724e-33	0.00453428
	rs9420589	T	G	10	94450233	intronic	HHEX	KRT86	12	52673015	0.428682	-0.0962083	0.0088081	8.97863e-28	0.00453386
	rs141094656	C	T	1	92753336	intronic	GLMN	NRG1	8	32059725	0.0195137	0.34418	0.0346808	3.26712e-23	0.00453296
	rs505404	G	T	11	243268	intronic	PSMD13	LY6G6E	6	31680695	0.222031	0.114501	0.0161939	1.54265e-12	0.00452921
	rs592423	A	C	6	139840693	intergenic	LINC01625;FILNC1	TMOD1	9	100313742	0.467953	-0.0953243	0.00795781	4.59472e-33	0.00452469
	rs1532331	G	T	5	43116830	intergenic	LOC100506639;ZNF131	NDUFV1	11	67377164	0.316115	-0.102294	0.0127052	8.18523e-16	0.00452442
	rs225245	G	A	17	33946107	intronic	AP2B1	CIZ1	9	130947502	0.440335	-0.0958052	0.0118998	8.21203e-16	0.00452397
	rs149007767	T	C	7	50370254	intronic	IKZF1	DBNDD2	20	44036973	0.149708	-0.133282	0.0114207	1.80997e-31	0.00452257
	rs149007767	T	C	7	50370254	intronic	IKZF1	DENND5A	11	9223654	0.149708	0.133246	0.0114019	1.4977e-31	0.00452014
	rs7310615	G	C	12	111865049	intronic	SH2B3	PDCD1LG2	9	5540913	0.537476	-0.0953128	0.0131972	5.11532e-13	0.00451675
	rs35979828	T	C	12	54685880	downstream	NFE2	TGFBI	5	135382045	0.0571059	-0.204751	0.0176019	2.82385e-31	0.00451466
	rs56378716	G	A	17	56356502	exonic	MPO	PDIA6	2	10950810	0.0168293	-0.369341	0.0628398	4.16509e-09	0.00451419
	rs55908509	A	G	19	16442019	intergenic	KLF2;EPS15L1	ASCL2	11	2290953	0.3284	-0.101145	0.00996999	3.49136e-24	0.00451262
	rs1555405	A	G	14	101176769	intergenic	LINC00523;DLK1	CRELD1	3	9981301	0.261541	0.108074	0.00924311	1.39391e-31	0.0045117
	rs56330463	T	C	5	148200011	intergenic	HTR4;ADRB2	AC010878.3	2	38044581	0.417903	-0.0962651	0.0162371	3.05342e-09	0.00450857
	rs10506328	A	C	12	54687232	intronic	NFE2	AC092653.5	2	73928093	0.339334	0.100271	0.016386	9.39873e-10	0.00450805
	rs56330463	T	C	5	148200011	intergenic	HTR4;ADRB2	FAM65B	6	24919919	0.417903	-0.096252	0.00805078	6.06936e-33	0.00450734
	rs1990760	C	T	2	163124051	exonic	IFIH1	IFI44	1	79122622	0.396134	-0.0970461	0.00853964	6.30393e-30	0.00450577
	rs1354034	T	C	3	56849749	intronic	ARHGEF3	SLC39A3	19	2736176	0.381863	-0.0976888	0.00828496	4.33837e-32	0.00450518
	rs8073060	A	T	17	33875262	exonic	SLFN14	GYPB	4	144989550	0.305723	-0.103	0.0128224	9.52729e-16	0.00450363
	rs149110519	T	C	6	144385777	upstream	PLAGL1	PFKFB4	3	48577282	0.0526158	0.212498	0.019698	3.93087e-27	0.00450176
	rs505404	G	T	11	243268	intronic	PSMD13	WASF3	13	27197462	0.222031	0.114151	0.00955404	6.65865e-33	0.00450156
	rs615672	C	G	6	32574171	intergenic	HLA-DRB1;HLA-DQA1	NAT9	17	72769596	0.373068	-0.0980178	0.0089302	4.98512e-28	0.00449416
	rs12466022	A	C	2	43359061	intergenic	LINC02580;ZFP36L2	GPR162	12	6933648	0.260124	-0.108046	0.00971561	9.92655e-29	0.00449355
	rs10876550	G	A	12	54712308	intergenic	NFE2;COPZ1	C7orf41	7	30188402	0.409936	-0.0963653	0.00879398	6.07616e-28	0.00449248
	rs2594836	G	A	5	173205318	intergenic	LINC01484;LINC01485	TBC1D30	12	65224700	0.250349	0.109385	0.01699	1.20899e-10	0.0044911
	rs6073966	T	C	20	44570192	intronic	PCIF1	ALAS2	X	55046492	0.166654	0.127147	0.0197504	1.21297e-10	0.00449041
	rs6592965	A	G	7	50427982	intronic	IKZF1	E2F2	1	23845317	0.449532	0.0952517	0.00796785	6.15026e-33	0.00449023
	rs149007767	T	C	7	50370254	intronic	IKZF1	ZMIZ1	10	80952534	0.149708	-0.132782	0.0115468	1.32682e-30	0.00448871
	rs56397034	C	G	19	13000550	intergenic	KLF1;GCDH	ESPN	1	6503139	0.361095	-0.098619	0.00829518	1.35499e-32	0.00448754
	rs149007767	T	C	7	50370254	intronic	IKZF1	CALML4	15	68490730	0.149708	-0.132722	0.0114429	4.18874e-31	0.00448462
	rs10820606	C	A	9	99192919	intergenic	ZNF367;HABP4	HIST1H2BH	6	26252091	0.236914	0.111366	0.0102589	1.87571e-27	0.00448437
	rs149007767	T	C	7	50370254	intronic	IKZF1	F2RL1	5	76122949	0.149708	0.132709	0.0172769	1.57482e-14	0.0044838
	rs10822184	C	T	10	65337153	intronic	REEP3	MYL9	20	35174057	0.511758	0.0946951	0.00794382	9.24404e-33	0.0044811
	rs3819306	G	A	6	31322133	intronic	HLA-B	PCED1A	20	2818898	0.449438	0.095136	0.00983612	3.96164e-22	0.00447915
	rs10098310	G	A	8	130613614	ncRNA_intronic	CCDC26	TGFBI	5	135382045	0.424993	0.0957197	0.00803253	9.71027e-33	0.00447803
	rs8073060	A	T	17	33875262	exonic	SLFN14	ESPN	1	6503139	0.305723	0.10267	0.00870168	3.95447e-32	0.00447487
	rs149007767	T	C	7	50370254	intronic	IKZF1	GPR162	12	6933648	0.149708	-0.132483	0.0114022	3.2959e-31	0.00446854
	rs875741	A	G	5	173287851	intergenic	LINC01485;CPEB4	RPIA	2	89020807	0.396388	0.0966235	0.00810314	8.85304e-33	0.0044676
	rs149110519	T	C	6	144385777	upstream	PLAGL1	RGS19	20	62707928	0.0526158	0.211623	0.0196984	6.37941e-27	0.00446478
	rs149007767	T	C	7	50370254	intronic	IKZF1	OTUD5	X	48797476	0.149708	0.132414	0.0220742	1.99026e-09	0.00446387
	rs149007767	T	C	7	50370254	intronic	IKZF1	CASP5	11	104879428	0.149708	-0.132402	0.0114022	3.58558e-31	0.00446303
	rs11553699	G	A	12	122216910	UTR3	RHOF;TMEM120B	CTTN	11	70263600	0.10963	0.151152	0.0130311	4.14977e-31	0.00446026
	rs11602954	A	G	11	202856	downstream	BET1L	HOMER2	15	83582249	0.211758	0.115588	0.0106871	2.90386e-27	0.00446019
	rs73204034	T	C	12	116839021	intergenic	MED13L;MIR4472-2	MEG3	14	101286557	0.0928617	0.162673	0.0158528	1.05062e-24	0.00445834
	rs6592965	A	G	7	50427982	intronic	IKZF1	BCL2L1	20	30282023	0.449532	0.0948583	0.007968	1.11597e-32	0.00445321
	rs7606173	C	G	2	60725451	intronic	BCL11A	SH3GLB2	9	131779948	0.393094	-0.0966052	0.00815743	2.35051e-32	0.00445296
	rs149110519	T	C	6	144385777	upstream	PLAGL1	GAPVD1	9	128076779	0.0526158	0.211323	0.0196985	7.52877e-27	0.00445213
	rs7570971	A	C	2	135837906	intronic	RAB3GAP1	ENSG00000070915	16	56924440	0.441154	-0.0950156	0.015626	1.19734e-09	0.00445146
	rs1990760	C	T	2	163124051	exonic	IFIH1	IFIT1	10	91158024	0.396134	-0.0964536	0.00853987	1.39697e-29	0.00445091
	rs1532331	G	T	5	43116830	intergenic	LOC100506639;ZNF131	NPM3	10	103542126	0.316115	-0.10145	0.0085537	1.90065e-32	0.00445005
	rs1354034	T	C	3	56849749	intronic	ARHGEF3	ARHGAP21	10	24942567	0.381863	-0.0970789	0.0121595	1.41896e-15	0.0044491
	rs149110519	T	C	6	144385777	upstream	PLAGL1	PARVG	22	44592124	0.0526158	0.211223	0.0196985	7.95578e-27	0.00444791
	rs6993770	T	A	8	106581528	intronic	ZFPM2	AQP10	1	154295683	0.273922	0.105662	0.00893429	2.84431e-32	0.00444099
	rs10876550	G	A	12	54712308	intergenic	NFE2;COPZ1	HRASLS	3	192977220	0.409936	-0.0958007	0.0149658	1.5406e-10	0.00444
	rs4917014	G	T	7	50305863	intergenic	SPATA48;IKZF1	SCAMP5	15	75281698	0.316454	-0.101301	0.00857447	3.29672e-32	0.00443948
	rs17825630	A	G	3	56950055	intronic	ARHGEF3	ITGA2B	17	42458210	0.108121	0.151672	0.0128075	2.35332e-32	0.00443669
	rs149110519	T	C	6	144385777	upstream	PLAGL1	PRCP	11	82608085	0.0526158	-0.210927	0.0196987	9.36598e-27	0.00443545
	rs2734442	G	A	12	10600368	intronic	KLRC1	KIR2DL1	19	55288518	0.124075	-0.142805	0.0223272	1.595e-10	0.00443268
	rs8026803	C	T	15	80260014	exonic	BCL2A1	TAGLN	11	117072767	0.247924	-0.108967	0.00917933	1.67654e-32	0.00442792
	rs3896594	G	T	2	8762414	intergenic	LINC01814;ID2-AS1	GSPT1	16	11985962	0.377086	-0.0969637	0.0081933	2.58882e-32	0.00441689
	rs4328821	G	A	3	128316435	intergenic	LINC01565;RPN1	CPA3	3	148599013	0.118714	-0.145266	0.0123521	6.24378e-32	0.00441547
	rs149007767	T	C	7	50370254	intronic	IKZF1	RP11-792D21.2	4	79585455	0.149708	-0.131675	0.0136451	4.91557e-22	0.0044142
	rs3184504	C	T	12	111884608	exonic	SH2B3	COLQ	3	15527449	0.542056	-0.0942225	0.00843222	5.4601e-29	0.00440754
	rs12478601	C	T	2	43721508	intronic	THADA	CLIC2	X	154534733	0.425396	-0.0949255	0.0148879	1.81773e-10	0.00440513
	rs4917014	G	T	7	50305863	intergenic	SPATA48;IKZF1	CCDC50	3	191081662	0.316454	-0.100906	0.00940608	7.54508e-27	0.00440493
	rs56330463	T	C	5	148200011	intergenic	HTR4;ADRB2	KIAA0226L	13	46964232	0.417903	0.0951423	0.00898272	3.25624e-26	0.00440401
	rs13289095	T	G	9	131466489	intronic	PKN3	TCN1	11	59627160	0.119513	0.144641	0.0202863	1.00369e-12	0.00440305
	rs259981	A	T	20	57748369	intronic	ZNF831	PHYH	10	13332104	0.369389	-0.0971925	0.00855267	6.31839e-30	0.0044009
	rs149110519	T	C	6	144385777	upstream	PLAGL1	NUP214	9	134055502	0.0526158	-0.210101	0.0307143	7.89172e-12	0.00440077
	rs11755527	G	C	6	90958231	intronic	BACH2	CD28	2	204586877	0.434419	0.0946124	0.0119185	2.04971e-15	0.00439875
	rs72928038	A	G	6	90976768	intronic	BACH2	AXIN2	17	63541223	0.158151	-0.128525	0.0113326	8.21059e-30	0.00439854
	rs11553699	G	A	12	122216910	UTR3	RHOF;TMEM120B	MYLK	3	123466037	0.10963	0.150089	0.0130315	1.07815e-30	0.00439769
	rs77526211	A	G	13	40974023	ncRNA_intronic	LINC00598	DHRS9	2	169936988	0.0432109	-0.230515	0.0202797	6.119e-30	0.00439377
	rs10761741	T	G	10	65066186	intronic	JMJD1C	RBPMS2	15	65049938	0.420816	0.094899	0.00802888	3.08785e-32	0.00438998
	rs141094656	C	T	1	92753336	intronic	GLMN	GPBAR1	2	219126400	0.0195137	0.338666	0.0346834	1.59899e-22	0.00438888
	rs8073060	A	T	17	33875262	exonic	SLFN14	ENSG00000175746	15	39544965	0.305723	-0.101639	0.00877822	5.29647e-31	0.00438539
	rs145269503	A	G	6	31705126	upstream	CLIC1	DEF8	16	90024400	0.0298663	-0.274924	0.028606	7.20574e-22	0.00437993
	rs10512472	C	T	17	33884804	exonic	SLFN14	F13A1	6	6232782	0.179037	0.122061	0.010339	3.63877e-32	0.00437978
	rs183211	A	G	17	44788310	intronic	NSF	BAG6	6	31613643	0.209952	0.114889	0.0180732	2.05866e-10	0.00437889
	rs16895831	T	C	6	42515791	intergenic	TRERF1;UBR2	CEACAM4	19	42129393	0.209742	0.114888	0.0168989	1.05714e-11	0.00437552
	rs149007767	T	C	7	50370254	intronic	IKZF1	DHRS13	17	27227444	0.149708	-0.131035	0.0114028	1.45562e-30	0.00437136
	rs2074585	A	G	15	91009484	intronic	IQGAP1	CALM3	19	47109190	0.522896	0.0935952	0.00793596	4.20147e-32	0.00437084
	rs55793580	T	C	9	127009395	intergenic	LHX2;NEK6	TSC22D3	X	106988511	0.169838	-0.124466	0.0196031	2.16297e-10	0.00436847
	rs10820606	C	A	9	99192919	intergenic	ZNF367;HABP4	HIST1H4H	6	26283522	0.236914	0.109845	0.0103017	1.51953e-26	0.00436271
	rs149007767	T	C	7	50370254	intronic	IKZF1	NFIL3	9	94178735	0.149708	0.130867	0.0114028	1.72749e-30	0.00436015
	rs4671393	A	G	2	60720951	intronic	BCL11A	HBBP1	11	5263975	0.153846	0.129408	0.0131396	6.94363e-23	0.00436
	rs56378716	G	A	17	56356502	exonic	MPO	CANX	5	179131777	0.0168293	-0.362747	0.0628448	7.82896e-09	0.00435443
	rs4360309	T	C	8	126523523	intergenic	TRIB1;LINC00861	ORM1	9	117087045	0.495365	-0.0933202	0.0118163	2.84325e-15	0.00435396
	rs17696736	G	A	12	112486818	intronic	NAA25	RP11-196G18.3	1	149760895	0.408694	0.0948612	0.0139557	1.06598e-11	0.00434928
	rs11066301	G	A	12	112871372	intronic	PTPN11	RP11-196G18.3	1	149760895	0.400736	0.0951268	0.0139997	1.08388e-11	0.00434622
	rs16971217	G	C	17	33944055	intronic	AP2B1	HIST2H2BE	1	149857121	0.177288	0.122048	0.0154693	3.02914e-15	0.00434529
	rs55793580	T	C	9	127009395	intergenic	LHX2;NEK6	TAGLN2	1	159891709	0.169838	-0.124056	0.0106186	1.55885e-31	0.0043397
	rs9944715	A	G	18	43831259	intronic	C18orf25	RUNDC3A	17	42390910	0.259134	0.106296	0.00906313	9.11656e-32	0.00433839
	rs7570971	A	C	2	135837906	intronic	RAB3GAP1	ENSG00000111249	12	111630093	0.441154	-0.0937943	0.0156269	1.94782e-09	0.00433776
	rs6084653	G	C	20	4157072	intronic	SMOX	TBC1D25	X	48409421	0.36636	-0.0966416	0.0152776	2.52087e-10	0.0043362
	rs505404	G	T	11	243268	intronic	PSMD13	THBS1	15	39882473	0.222031	0.112014	0.00955484	9.68253e-32	0.00433463
	rs57994353	C	T	9	139356987	intronic	SEC16A	HERC5	4	89402791	0.294804	-0.102099	0.00936842	1.1756e-27	0.00433426
	rs2293889	T	G	8	116599199	intronic	TRPS1	EMR1	19	6914023	0.399397	0.0950321	0.00820969	5.47866e-31	0.00433275
	rs78744187	T	C	19	33754548	intergenic	SLC7A10;CEBPA	CPA3	3	148599013	0.0806295	-0.170899	0.0168478	3.53453e-24	0.00433006
	rs56388170	T	G	7	28724374	intronic	CREB5	DYNC1LI1	3	32589914	0.289189	0.102625	0.0130307	3.39112e-15	0.00432984
	rs3896594	G	T	2	8762414	intergenic	LINC01814;ID2-AS1	TMOD1	9	100313742	0.377086	-0.0959725	0.00819367	1.09341e-31	0.00432705
	rs149110519	T	C	6	144385777	upstream	PLAGL1	MED25	19	50331806	0.0526158	-0.20822	0.0307155	1.21011e-11	0.00432233
	rs13325613	T	G	3	46298373	intronic	CCR3	RORC	1	151791447	0.0854911	-0.166114	0.0142024	1.3329e-31	0.0043147
	rs8082605	T	G	17	33864771	UTR5	SLFN12L	GUK1	1	228332174	0.0436372	0.227313	0.0289202	3.84133e-15	0.00431278
	rs11671005	A	G	19	58963530	intronic	ZNF324B	ARHGAP10	4	148823572	0.24568	0.107834	0.00939811	1.78226e-30	0.00430989
	rs13062095	C	T	3	101267385	intergenic	FAM172BP;TRMT10C	ZNF17	19	57927919	0.350092	0.0972713	0.00832531	1.54243e-31	0.0043056
	rs149007767	T	C	7	50370254	intronic	IKZF1	FAM45A	10	120880547	0.149708	0.129938	0.0203824	1.82963e-10	0.00429848
	rs79755767	A	G	12	54698408	intergenic	NFE2;COPZ1	IFIT1B	10	91141387	0.0977363	-0.156052	0.0148303	6.80438e-26	0.00429496
	rs3184504	C	T	12	111884608	exonic	SH2B3	NLRC5	16	57070420	0.542056	-0.0929988	0.0132084	1.91002e-12	0.00429379
	rs6684514	A	G	1	156255456	exonic	TMEM79	IL1RN	2	113878192	0.287248	0.102352	0.00881446	3.58978e-31	0.00428959
	rs6592965	A	G	7	50427982	intronic	IKZF1	STOML2	9	35101521	0.449532	0.0930939	0.00796866	1.5662e-31	0.00428909
	rs67682613	A	G	6	31826705	UTR3	NEU1	TRAV21	14	22521044	0.137494	0.134444	0.0132981	4.98843e-24	0.00428702
	rs10512472	C	T	17	33884804	exonic	SLFN14	RILP	17	1551407	0.179037	0.120663	0.0103395	1.8121e-31	0.00428003
	rs12589699	G	A	14	69212885	intergenic	RAD51B;ZFP36L1	GRAP2	22	40333405	0.127908	-0.138474	0.0118687	1.87713e-31	0.00427783
	rs592423	A	C	6	139840693	intergenic	LINC01625;FILNC1	DNAJB2	2	220147805	0.467953	0.0926803	0.0079588	2.43322e-31	0.00427717
	rs35979828	T	C	12	54685880	downstream	NFE2	PELO	5	52091827	0.0571059	-0.199201	0.0205036	2.59229e-22	0.00427324
	rs149110519	T	C	6	144385777	upstream	PLAGL1	TMC8	17	76132950	0.0526158	0.207012	0.0307162	1.58933e-11	0.00427232
	rs9399137	C	T	6	135419018	intergenic	HBS1L;MYB	SHARPIN	8	145158281	0.264393	-0.104791	0.00903554	4.23797e-31	0.0042714
	rs149007767	T	C	7	50370254	intronic	IKZF1	SQSTM1	5	179249233	0.149708	0.129428	0.0114442	1.17759e-29	0.00426479
	rs56388170	T	G	7	28724374	intronic	CREB5	SIPA1L2	1	232615507	0.289189	-0.101822	0.00878893	4.89251e-31	0.00426239
	rs11553699	G	A	12	122216910	UTR3	RHOF;TMEM120B	PARVB	22	44480098	0.10963	0.147726	0.0130324	8.7731e-30	0.00426032
	rs13198474	A	G	6	25874423	UTR5	SLC17A3	TRAV12-2	14	22356359	0.0692555	0.181664	0.0305626	2.7815e-09	0.00425454
	rs149007767	T	C	7	50370254	intronic	IKZF1	CYBB	X	37655989	0.149708	-0.129269	0.0220765	4.75577e-09	0.00425433
	rs385492	T	C	6	29649547	upstream	ZFP57	TRAV17	14	22466092	0.469685	0.0924054	0.0162474	1.28988e-08	0.00425369
	rs149007767	T	C	7	50370254	intronic	IKZF1	CDS2	20	5142982	0.149708	0.129233	0.0114442	1.43076e-29	0.00425195
	rs149110519	T	C	6	144385777	upstream	PLAGL1	PHF3	6	64417477	0.0526158	0.206498	0.0200797	8.32876e-25	0.00425113
	rs56388170	T	G	7	28724374	intronic	CREB5	CRISPLD2	16	84903982	0.289189	-0.10165	0.008789	6.15595e-31	0.00424796
	rs342296	A	G	7	106372903	intergenic	CCDC71L;PIK3CG	HIST1H4H	6	26283522	0.441001	0.0927828	0.00805322	1.03164e-30	0.00424439
	rs13062095	C	T	3	101267385	intergenic	FAM172BP;TRMT10C	ZNF547	19	57882889	0.350092	0.096565	0.00832557	4.18874e-31	0.0042433
	rs354033	A	G	7	149289464	ncRNA_intronic	ZNF767P	PLEKHG4	16	67317407	0.25016	0.106349	0.00998744	1.77578e-26	0.00424312
	rs7634389	C	T	3	186738421	intronic	ST6GAL1	IGHV4-34	14	106829835	0.376203	0.0950784	0.0160178	2.92416e-09	0.00424286
	rs8073060	A	T	17	33875262	exonic	SLFN14	CRAT	9	131865278	0.305723	0.0999427	0.0087027	1.58578e-30	0.00424027
	rs149110519	T	C	6	144385777	upstream	PLAGL1	TACC3	4	1735062	0.0526158	-0.206196	0.0307168	1.90925e-11	0.00423868
	rs1354034	T	C	3	56849749	intronic	ARHGEF3	TMEM189	20	48733999	0.381863	-0.0947549	0.00818687	5.58183e-31	0.00423863
	rs111778408	A	G	14	35572163	ncRNA_intronic	LOC101927178	ENSG00000250661	1	150134258	0.100785	-0.152838	0.0241572	2.50297e-10	0.004234
	rs7515577	C	A	1	93009438	intronic	EVI5	TSHZ3	19	31803152	0.198851	-0.11526	0.0109406	5.952e-26	0.00423281
	rs1354034	T	C	3	56849749	intronic	ARHGEF3	UBL4A	X	153713532	0.381863	-0.0946187	0.0151516	4.24343e-10	0.00422646
	rs10761741	T	G	10	65066186	intronic	JMJD1C	OXTR	3	8801704	0.420816	-0.093113	0.00802954	4.30282e-31	0.00422629
	rs1265097	A	C	6	31106459	exonic	PSORS1C1	TRAV20	14	22509119	0.114514	0.144307	0.0150085	6.91094e-22	0.00422322
	rs34097845	T	C	17	56358429	upstream	MPO	CALR	19	13052347	0.0552438	0.201039	0.0192719	1.77681e-25	0.00421885
	rs9376090	C	T	6	135411228	intergenic	HBS1L;MYB	C2orf88	2	190906272	0.262879	0.104335	0.00909153	1.73951e-30	0.00421879
	rs4328821	G	A	3	128316435	intergenic	LINC01565;RPN1	FCER1A	1	159268759	0.118714	-0.141987	0.012404	2.43706e-30	0.00421838
	rs10512472	C	T	17	33884804	exonic	SLFN14	ANO6	12	45721978	0.179037	0.119773	0.0112829	2.52439e-26	0.00421713
	rs4822024	A	G	22	41757647	intergenic	ZC3H7B;TEF	REV1	2	100061717	0.224124	0.110089	0.00952351	6.59387e-31	0.004215
	rs10774624	A	G	12	111833788	intergenic	PHETA1;SH2B3	TUBB6	18	12325993	0.538565	0.0920392	0.00847788	1.85935e-27	0.00421041
	rs4328821	G	A	3	128316435	intergenic	LINC01565;RPN1	CLC	19	40225279	0.118714	-0.141785	0.0123534	1.71356e-30	0.0042064
	rs11553699	G	A	12	122216910	UTR3	RHOF;TMEM120B	PROS1	3	93642395	0.10963	0.146782	0.0194828	4.92468e-14	0.00420605
	rs56330463	T	C	5	148200011	intergenic	HTR4;ADRB2	EGLN1	1	231530143	0.417903	-0.0929649	0.00878943	3.81368e-26	0.00420474
	rs35033748	C	T	17	27179590	intergenic	FAM222B;ERAL1	FAM46C	1	118159775	0.215702	-0.111467	0.0103784	6.58301e-27	0.00420396
	rs73925236	A	G	19	13037710	intronic	FARSA	ESPN	1	6503139	0.0354836	0.24768	0.0225133	3.75828e-28	0.00419903
	rs35033748	C	T	17	27179590	intergenic	FAM222B;ERAL1	RBM38	20	55975426	0.215702	-0.111386	0.0104193	1.13005e-26	0.00419782
	rs4917014	G	T	7	50305863	intergenic	SPATA48;IKZF1	IFI44	1	79122622	0.316454	-0.0984916	0.00857552	1.56573e-30	0.00419668
	rs1354034	T	C	3	56849749	intronic	ARHGEF3	GAS2L1	22	29705673	0.381863	-0.0942739	0.00818705	1.1086e-30	0.00419571
	rs111778408	A	G	14	35572163	ncRNA_intronic	LOC101927178	NBN	8	90980510	0.100785	-0.152095	0.0135045	2.00975e-29	0.00419293
	rs7570971	A	C	2	135837906	intronic	RAB3GAP1	DNASE1L3	3	58189204	0.441154	-0.0921869	0.0156281	3.66155e-09	0.00419035
	rs9944715	A	G	18	43831259	intronic	C18orf25	UBB	17	16285085	0.259134	0.104457	0.00906956	1.0794e-30	0.00418955
	rs113422568	A	G	10	104337938	intronic	SUFU	PF4V1	4	74719389	0.28197	-0.101663	0.00941595	3.56021e-27	0.00418506
	rs1354034	T	C	3	56849749	intronic	ARHGEF3	HIST1H2BG	6	26216650	0.381863	0.0941432	0.0081594	8.48757e-31	0.00418408
	rs592423	A	C	6	139840693	intergenic	LINC01625;FILNC1	PITHD1	1	24109808	0.467953	-0.0916541	0.00884282	3.58508e-25	0.00418298
	rs149007767	T	C	7	50370254	intronic	IKZF1	LINC00877	3	72188083	0.149708	-0.128157	0.0202136	2.29616e-10	0.00418143
	rs1990760	C	T	2	163124051	exonic	IFIH1	HERC5	4	89402791	0.396134	-0.0934586	0.00854104	7.2341e-28	0.0041788
	rs1354034	T	C	3	56849749	intronic	ARHGEF3	MAP4K2	11	64563501	0.381863	-0.0940806	0.00815943	9.28197e-31	0.00417852
	rs6592965	A	G	7	50427982	intronic	IKZF1	CAPN5	11	76807590	0.449532	0.0918552	0.00796911	9.71205e-31	0.00417571
	rs78744187	T	C	19	33754548	intergenic	SLC7A10;CEBPA	GCSAML	1	247705676	0.0806295	-0.167817	0.0194991	7.53909e-18	0.0041753
	rs17696736	G	A	12	112486818	intronic	NAA25	GBP2	1	89593977	0.408694	0.0929347	0.00812828	2.84409e-30	0.00417442
	rs615672	C	G	6	32574171	intergenic	HLA-DRB1;HLA-DQA1	DEF8	16	90024400	0.373068	0.0944574	0.00893163	3.86694e-26	0.00417359
	rs11602954	A	G	11	202856	downstream	BET1L	ACSBG1	15	78498920	0.211758	0.111789	0.0107328	2.10245e-25	0.00417185
	rs12485444	T	A	3	188135783	intronic	LPP	GFRA2	8	21608892	0.490804	-0.091328	0.00798594	2.76016e-30	0.00416899
	rs10512472	C	T	17	33884804	exonic	SLFN14	MGLL	3	127474980	0.179037	0.119083	0.0103401	1.08821e-30	0.00416864
	rs149007767	T	C	7	50370254	intronic	IKZF1	SMAP2	1	40849760	0.149708	0.127916	0.0114115	3.6667e-29	0.00416577
	rs149110519	T	C	6	144385777	upstream	PLAGL1	HLX	1	221055411	0.0526158	-0.204386	0.0197838	5.10258e-25	0.00416461
	rs56388170	T	G	7	28724374	intronic	CREB5	WLS	1	68631472	0.289189	-0.100633	0.00881952	3.71446e-30	0.00416341
	rs11066301	G	A	12	112871372	intronic	PTPN11	S100A10	1	151961128	0.400736	-0.0930761	0.00818208	5.53211e-30	0.00416086
	rs16989695	A	G	19	4505445	intronic	PLIN4	PDZK1IP1	1	47652990	0.487856	0.0912103	0.00899474	3.65599e-24	0.0041572
	rs10512472	C	T	17	33884804	exonic	SLFN14	LY6G6E	6	31680695	0.179037	0.118898	0.0175585	1.27454e-11	0.00415568
	rs111778408	A	G	14	35572163	ncRNA_intronic	LOC101927178	LINC00877	3	72188083	0.100785	-0.1514	0.0226219	2.1924e-11	0.00415469
	rs2227901	A	G	4	57798189	exonic	REST	GOLGA7B	10	99618889	0.203258	0.113212	0.0107494	6.15788e-26	0.00415124
	rs12478601	C	T	2	43721508	intronic	THADA	CYBB	X	37655989	0.425396	0.0920939	0.0148899	6.21025e-10	0.00414624
	rs149007767	T	C	7	50370254	intronic	IKZF1	IL2RG	X	70329606	0.149708	0.127545	0.0220777	7.59991e-09	0.00414164
	rs149110519	T	C	6	144385777	upstream	PLAGL1	CHI3L1	1	203151968	0.0526158	0.203789	0.0221898	4.15755e-20	0.00414033
	rs7896518	G	A	10	65104500	intronic	JMJD1C	C6orf25	6	31690431	0.422848	0.0920728	0.0119603	1.37996e-14	0.00413777
	rs55908509	A	G	19	16442019	intergenic	KLF2;EPS15L1	ZNF683	1	26694569	0.3284	-0.096812	0.00997189	2.77389e-22	0.00413431
	rs57994353	C	T	9	139356987	intronic	SEC16A	IFI44L	1	79097045	0.294804	-0.0997031	0.00936936	1.91234e-26	0.00413324
	rs77526211	A	G	13	40974023	ncRNA_intronic	LINC00598	MPZL1	1	167725792	0.0432109	-0.223543	0.0203569	4.7063e-28	0.00413201
	rs10820606	C	A	9	99192919	intergenic	ZNF367;HABP4	C6orf25	6	31690431	0.236914	0.106896	0.0173176	6.71335e-10	0.00413162
	rs6084653	G	C	20	4157072	intronic	SMOX	GYPB	4	144989550	0.36636	0.0942886	0.0122633	1.48638e-14	0.00412761
	rs149007767	T	C	7	50370254	intronic	IKZF1	SLC44A2	19	10734184	0.149708	0.12731	0.0114042	6.15209e-29	0.00412639
	rs149007767	T	C	7	50370254	intronic	IKZF1	STK40	1	36828361	0.149708	0.127261	0.011445	1.00949e-28	0.0041232
	rs705705	C	G	12	56435504	upstream	RPS26	RPS15AP11	1	45246192	0.307877	-0.098312	0.0139908	2.11173e-12	0.00411911
	rs17087335	T	G	4	57838583	intronic	NOA1	AC006946.15	22	17607735	0.203202	0.112772	0.0174481	1.02444e-10	0.00411822
	rs149007767	T	C	7	50370254	intronic	IKZF1	AQP9	15	58454239	0.149708	0.127174	0.0114042	7.04093e-29	0.00411756
	rs3184504	C	T	12	111884608	exonic	SH2B3	BATF2	11	64759966	0.542056	-0.0910495	0.00840165	2.29635e-27	0.00411568
	rs79755767	A	G	12	54698408	intergenic	NFE2;COPZ1	RNF182	6	13952605	0.0977363	-0.152704	0.0148895	1.11449e-24	0.00411264
	rs2572207	T	C	15	66070693	intronic	DENND4A	ALAS2	X	55046492	0.251973	0.104429	0.0169577	7.35764e-10	0.00411097
	rs10512472	C	T	17	33884804	exonic	SLFN14	BMP6	6	7804342	0.179037	0.118241	0.0103404	2.79859e-30	0.00410995
	rs149110519	T	C	6	144385777	upstream	PLAGL1	BTBD10	11	13447196	0.0526158	0.20303	0.0307188	3.86142e-11	0.00410952
	rs17696736	G	A	12	112486818	intronic	NAA25	S100A10	1	151961128	0.408694	-0.0921727	0.00815659	1.30622e-29	0.00410625
	rs12718598	C	T	7	50428445	intronic	IKZF1	44993	10	46020194	0.481049	0.0906668	0.00801035	1.06033e-29	0.00410433
	rs9389269	C	T	6	135427159	intergenic	HBS1L;MYB	FBXO7	22	32882740	0.272314	-0.101743	0.00890564	3.15103e-30	0.00410258
	rs149007767	T	C	7	50370254	intronic	IKZF1	RP11-344B5.2	9	132046372	0.149708	-0.126924	0.0136473	1.4005e-20	0.00410136
	rs79755767	A	G	12	54698408	intergenic	NFE2;COPZ1	ZNF185	X	152112505	0.0977363	-0.152447	0.0259847	4.44286e-09	0.0040988
	rs10876550	G	A	12	54712308	intergenic	NFE2;COPZ1	SH3BGRL2	6	80377186	0.409936	-0.0920436	0.00806057	3.36079e-30	0.00409857
	rs782590	C	T	2	55843413	intronic	PPP4R3B	MTRNR2L1	17	22023214	0.493968	-0.0905017	0.00929128	2.02555e-22	0.00409468
	rs149007767	T	C	7	50370254	intronic	IKZF1	TMEM140	7	134841737	0.149708	0.126803	0.0114043	1.0163e-28	0.00409355
	rs1354034	T	C	3	56849749	intronic	ARHGEF3	DBN1	5	176892505	0.381863	-0.0931145	0.00815978	3.66778e-30	0.00409314
	rs114694170	C	T	5	88180196	ncRNA_intronic	MEF2C-AS1	CLEC1B	12	10152132	0.0523176	-0.203063	0.0182875	1.20087e-28	0.00408886
	rs8073060	A	T	17	33875262	exonic	SLFN14	HIST1H2AE	6	26217438	0.305723	-0.098084	0.00867347	1.19108e-29	0.00408401
	rs55908509	A	G	19	16442019	intergenic	KLF2;EPS15L1	HKDC1	10	71003687	0.3284	-0.0962102	0.00997214	5.01726e-22	0.00408307
	rs28453840	G	A	2	136522941	intronic	UBXN4	SHD	19	4284659	0.31882	-0.0969359	0.00938637	5.30323e-25	0.00408138
	rs1990760	C	T	2	163124051	exonic	IFIH1	IFI6	1	27995650	0.396134	-0.0922763	0.00854149	3.32051e-27	0.00407373
	rs149110519	T	C	6	144385777	upstream	PLAGL1	WLS	1	68631472	0.0526158	-0.202142	0.0197847	1.6624e-24	0.00407366
	rs149007767	T	C	7	50370254	intronic	IKZF1	IDH1	2	209115874	0.149708	-0.12649	0.0172805	2.48341e-13	0.00407338
	rs1354034	T	C	3	56849749	intronic	ARHGEF3	GP5	3	194117772	0.381863	-0.0928789	0.0151528	8.81557e-10	0.00407246
	rs9386791	T	C	6	109608497	ncRNA_intronic	CCDC162P	DSC2	18	28664159	0.473186	0.0903625	0.00796721	8.14517e-30	0.00407095
	rs28453840	G	A	2	136522941	intronic	UBXN4	SCAMP5	15	75281698	0.31882	-0.0967658	0.00938644	6.40988e-25	0.00406706
	rs114694170	C	T	5	88180196	ncRNA_intronic	MEF2C-AS1	SH3BGRL2	6	80377186	0.0523176	0.202487	0.0182877	1.70956e-28	0.00406571
	rs2233956	C	T	6	31081205	upstream	C6orf15	TRAV21	14	22521044	0.157552	0.123729	0.0123583	1.35269e-23	0.00406386
	rs11602954	A	G	11	202856	downstream	BET1L	MYL9	20	35174057	0.211758	0.110317	0.0106893	5.69853e-25	0.00406273
	rs79755767	A	G	12	54698408	intergenic	NFE2;COPZ1	VWCE	11	61044329	0.0977363	0.151774	0.0135527	4.13294e-29	0.0040627
	rs10423726	C	A	19	16444697	intergenic	KLF2;EPS15L1	CARNS1	11	67187758	0.404467	0.0918167	0.0145013	2.42632e-10	0.00406127
	rs1354034	T	C	3	56849749	intronic	ARHGEF3	TMEM106C	12	48360006	0.381863	-0.0927398	0.00815991	6.22502e-30	0.00406027
	rs10512472	C	T	17	33884804	exonic	SLFN14	FAM134A	2	220045574	0.179037	0.117477	0.0103407	6.56167e-30	0.004057
	rs141094656	C	T	1	92753336	intronic	GLMN	MS4A14	11	60165582	0.0195137	0.325449	0.0396516	2.25466e-16	0.004053
	rs6993770	T	A	8	106581528	intronic	ZFPM2	C12orf39	12	21684776	0.273922	-0.100929	0.0174009	6.62359e-09	0.004052
	rs17081935	T	C	4	57823476	intergenic	REST;NOA1	SPR	2	73116888	0.202608	0.111981	0.00992355	1.56707e-29	0.00405181
	rs11604127	T	C	11	196944	UTR5	ODF3	RP11-588K22.2	4	156656907	0.211394	0.110235	0.0200333	3.74231e-08	0.00405158
	rs7075195	G	A	10	65050659	intronic	JMJD1C	PPBP	4	74853334	0.421253	0.0911459	0.00804373	9.18315e-30	0.00405075
	rs6084653	G	C	20	4157072	intronic	SMOX	C19orf77	19	3477472	0.36636	-0.0934056	0.00905181	5.78222e-25	0.00405066
	rs7210990	A	C	17	16170764	intronic	PIGL	CCNJL	5	159725531	0.481977	0.090046	0.00797559	1.46702e-29	0.00404888
	rs2013208	C	T	3	50129399	intronic	RBM5	DPEP3	16	68012149	0.469446	0.0901293	0.00794377	7.77224e-30	0.00404648
	rs1354034	T	C	3	56849749	intronic	ARHGEF3	METTL22	16	8727810	0.381863	-0.092558	0.00906206	1.71994e-24	0.00404437
	rs9915021	T	C	17	33976619	intronic	AP2B1	NT5C3A	7	33078075	0.0591544	-0.190561	0.0312063	1.0184e-09	0.00404208
	rs56388170	T	G	7	28724374	intronic	CREB5	CA4	17	58237778	0.289189	-0.0991335	0.00878991	1.68343e-29	0.00404024
	rs57994353	C	T	9	139356987	intronic	SEC16A	IFI44	1	79122622	0.294804	-0.0985115	0.00936982	7.47039e-26	0.00403503
	rs10852622	G	A	16	88556880	intronic	ZFPM1	TREML1	6	41119577	0.293204	0.0986257	0.0109264	1.77412e-19	0.00403157
	rs1354034	T	C	3	56849749	intronic	ARHGEF3	ZNF385D	3	21937363	0.381863	-0.0923912	0.00816003	1.0165e-29	0.0040298
	rs7896783	A	G	10	65162153	intronic	JMJD1C	PROS1	3	93642395	0.488519	0.089798	0.0118208	3.04012e-14	0.00402971
	rs826415	G	T	1	118153977	intronic	TENT5C	C12orf39	12	21684776	0.308498	0.0971538	0.0168019	7.36861e-09	0.00402713
	rs4727027	G	A	7	148869277	intronic	ZNF398	F2RL1	5	76122949	0.360903	0.0934037	0.0123034	3.15735e-14	0.00402454
	rs12974711	C	T	19	11297258	intronic	KANK2	AHSP	16	31539654	0.0629954	0.184628	0.0163476	1.40654e-29	0.00402417
	rs342296	A	G	7	106372903	intergenic	CCDC71L;PIK3CG	ENSG00000175746	15	39544965	0.441001	0.0903436	0.0081242	9.99354e-29	0.00402416
	rs10820606	C	A	9	99192919	intergenic	ZNF367;HABP4	BMP6	6	7804342	0.236914	-0.105486	0.0102613	8.67276e-25	0.00402329
	rs2227901	A	G	4	57798189	exonic	REST	CDH2	18	25644170	0.203258	0.11145	0.0098516	1.13282e-29	0.00402307
	rs149007767	T	C	7	50370254	intronic	IKZF1	ELF4	X	129221770	0.149708	0.125696	0.0220791	1.24826e-08	0.00402242
	rs592423	A	C	6	139840693	intergenic	LINC01625;FILNC1	RAB3IL1	11	61676257	0.467953	0.0898704	0.00795982	1.46203e-29	0.00402175
	rs592423	A	C	6	139840693	intergenic	LINC01625;FILNC1	YBX3	12	10863797	0.467953	-0.0898527	0.00868881	4.58757e-25	0.00402017
	rs8073060	A	T	17	33875262	exonic	SLFN14	HIST1H4H	6	26283522	0.305723	-0.0973001	0.00870367	5.15526e-29	0.00401899
	rs34856868	A	G	1	92554283	exonic	BTBD8	C19orf59	19	7743113	0.0245314	0.289779	0.0324748	4.53006e-19	0.00401883
	rs1532331	G	T	5	43116830	intergenic	LOC100506639;ZNF131	GUSBP5	4	144525541	0.316115	-0.0963912	0.0100245	6.87076e-22	0.00401729
	rs8073060	A	T	17	33875262	exonic	SLFN14	WASF2	1	27773699	0.305723	0.0972649	0.00877985	1.60058e-28	0.00401609
	rs1015166	T	C	6	32798731	intronic	TAP2	TRAV20	14	22509119	0.342814	0.0943752	0.01007	7.12384e-21	0.00401321
	rs12485444	T	A	3	188135783	intronic	LPP	MLKL	16	74720305	0.490804	-0.0895758	0.00798657	3.41088e-29	0.00401055
	rs7846314	T	A	8	61650831	intronic	CHD7	CAMP	3	48265909	0.178349	-0.116935	0.0103754	1.83733e-29	0.0040075
	rs149007767	T	C	7	50370254	intronic	IKZF1	CEACAM3	19	42307980	0.149708	-0.125443	0.0114048	3.85965e-28	0.00400623
	rs56330463	T	C	5	148200011	intergenic	HTR4;ADRB2	CHSY1	15	101754032	0.417903	0.090715	0.00805282	1.95352e-29	0.00400368
	rs7740107	T	A	6	130374461	intronic	L3MBTL3	SAMD1	19	14200250	0.258173	0.102233	0.0099068	5.75219e-25	0.00400339
	rs3811444	T	C	1	248039451	exonic	TRIM58	HIST1H2BG	6	26216650	0.337611	0.0946078	0.00838357	1.55819e-29	0.00400326
	rs149110519	T	C	6	144385777	upstream	PLAGL1	RETN	19	7734632	0.0526158	0.200385	0.0197029	2.69079e-24	0.00400315
	rs11795343	C	T	9	32523737	intronic	DDX58	IFIT1	10	91158024	0.389022	-0.0917641	0.00813194	1.56707e-29	0.0040029
	rs1047891	A	C	2	211540507	exonic	CPS1	PSAT1	9	80928534	0.312948	-0.0964747	0.00900101	8.36147e-27	0.00400238
	rs10971930	C	T	9	34116083	intronic	DCAF12	L3MBTL3	6	130398719	0.133691	-0.131445	0.0116707	2.00292e-29	0.00400212
	rs7570971	A	C	2	135837906	intronic	RAB3GAP1	ITM2C	2	231736658	0.441154	-0.0900815	0.00895469	8.32516e-24	0.00400114
	rs4917017	A	G	7	50335232	intergenic	SPATA48;IKZF1	LAMB2	3	49164549	0.301139	0.0974744	0.00864203	1.6644e-29	0.00399916
	rs8067378	A	G	17	38051348	intergenic	ZPBP2;GSDMB	S100B	21	48021998	0.502612	0.0894224	0.011818	3.83119e-14	0.00399807
	rs11066301	G	A	12	112871372	intronic	PTPN11	GBP2	1	89593977	0.400736	0.0912274	0.00815463	4.71075e-29	0.00399722
	rs13330176	A	T	16	86019087	intergenic	IRF8;LINC01082	HLA-DPA1	6	33040449	0.21644	-0.108532	0.0148343	2.54901e-13	0.00399538
	rs225245	G	A	17	33946107	intronic	AP2B1	HBM	16	210329	0.440335	-0.0900085	0.00812073	1.50353e-28	0.00399308
	rs10243593	A	G	7	39972125	intergenic	LINC00265;LOC112267983	OR13A1	10	45804579	0.481416	0.0893935	0.0086583	5.45457e-25	0.00399008
	rs1354034	T	C	3	56849749	intronic	ARHGEF3	NENF	1	212612971	0.381863	-0.0919068	0.00818791	3.08431e-29	0.00398765
	rs505404	G	T	11	243268	intronic	PSMD13	LGALSL	2	64684809	0.222031	0.107409	0.0106981	1.01674e-23	0.00398554
	rs11553699	G	A	12	122216910	UTR3	RHOF;TMEM120B	TREML1	6	41119577	0.10963	0.142851	0.0130342	5.96969e-28	0.00398377
	rs6592965	A	G	7	50427982	intronic	IKZF1	SH3GLB2	9	131779948	0.449532	0.0896212	0.00799697	3.77173e-29	0.00397507
	rs741738	A	G	11	309508	downstream	IFITM2	ABCA1	9	107616900	0.195461	-0.11242	0.0132723	2.44762e-17	0.0039749
	rs17087335	T	G	4	57838583	intronic	NOA1	RPH3A	12	113172435	0.203202	0.110787	0.00985286	2.47329e-29	0.00397455
	rs10980797	G	A	9	113912553	intergenic	LPAR1;MIR7702	CYBB	X	37655989	0.472236	-0.0892665	0.0147472	1.42085e-09	0.00397197
	rs8026803	C	T	15	80260014	exonic	BCL2A1	MTSS1	8	125651880	0.247924	-0.103187	0.00921261	4.04981e-29	0.00397062
	rs1375493	G	A	2	182323766	intronic	ITGA4	ENSG00000114204	3	167178184	0.434923	-0.0898752	0.0124821	6.00802e-13	0.00397036
	rs17825630	A	G	3	56950055	intronic	ARHGEF3	ITGB3	17	45376435	0.108121	0.143463	0.0190286	4.72501e-14	0.00396939
	rs56388170	T	G	7	28724374	intronic	CREB5	PRDM8	4	81115258	0.289189	0.0982353	0.00879023	5.37468e-29	0.00396735
	rs505404	G	T	11	243268	intronic	PSMD13	GUCY1A3	4	156620682	0.222031	0.107126	0.00958917	5.616e-29	0.00396459
	rs111778408	A	G	14	35572163	ncRNA_intronic	LOC101927178	SQSTM1	5	179249233	0.100785	-0.14788	0.0135453	9.50768e-28	0.00396379
	rs12264390	C	T	10	959111	intronic	LARP4B	LETM2	8	38255385	0.21134	0.108972	0.0144738	5.11696e-14	0.00395849
	rs628751	C	A	6	139838419	intergenic	LINC01625;FILNC1	UBXN6	19	4451407	0.494381	0.0889793	0.00792978	3.21977e-29	0.00395816
	rs149007767	T	C	7	50370254	intronic	IKZF1	TIAM2	6	155366344	0.149708	0.124679	0.0114459	1.24608e-27	0.0039576
	rs10423726	C	A	19	16444697	intergenic	KLF2;EPS15L1	ENSG00000165061	8	40571730	0.404467	0.0906048	0.0145021	4.16541e-10	0.00395477
	rs1122794	A	C	16	309155	intronic	FAM234A	TUBBP5	9	141058193	0.185217	0.114468	0.0189519	1.5421e-09	0.00395474
	rs149110519	T	C	6	144385777	upstream	PLAGL1	TIMP2	17	76885264	0.0526158	0.199168	0.0221054	2.06244e-19	0.00395467
	rs56388170	T	G	7	28724374	intronic	CREB5	P2RY13	3	151045718	0.289189	0.09804	0.0087903	6.90766e-29	0.0039516
	rs3184504	C	T	12	111884608	exonic	SH2B3	YWHAQ	2	9747622	0.542056	0.0892127	0.0132106	1.44719e-11	0.0039513
	rs8078723	C	T	17	38166879	intergenic	PSMD3;CSF3	MARCKS	6	114181594	0.379928	0.0914886	0.0121745	5.6998e-14	0.00394374
	rs1354034	T	C	3	56849749	intronic	ARHGEF3	LGALS12	11	63278901	0.381863	-0.0913712	0.0081604	4.22252e-29	0.00394131
	rs10820606	C	A	9	99192919	intergenic	ZNF367;HABP4	PVALB	22	37206125	0.236914	0.104401	0.0173193	1.66001e-09	0.00394094
	rs7846314	T	A	8	61650831	intronic	CHD7	MAPRE3	2	27221772	0.178349	0.115959	0.0103757	5.3445e-29	0.00394091
	rs8026803	C	T	15	80260014	exonic	BCL2A1	PPM1N	19	45998901	0.247924	-0.10272	0.0136846	6.08684e-14	0.00393475
	rs8026803	C	T	15	80260014	exonic	BCL2A1	HES4	1	934947	0.247924	-0.102687	0.00918162	4.8838e-29	0.00393227
	rs56388170	T	G	7	28724374	intronic	CREB5	RHOQ	2	46789602	0.289189	0.0977732	0.010151	5.86351e-22	0.00393012
	rs10761741	T	G	10	65066186	intronic	JMJD1C	NRGN	11	124613849	0.420816	0.0897829	0.00803074	5.11476e-29	0.0039294
	rs1800973	A	C	12	69744014	exonic	LYZ	ITPK1-AS1	14	93536147	0.0661727	-0.178187	0.0205183	3.81082e-18	0.003924
	rs8073060	A	T	17	33875262	exonic	SLFN14	PEAR1	1	156874858	0.305723	0.0961157	0.00951886	5.67262e-24	0.00392175
	rs1427407	T	G	2	60718043	intronic	BCL11A	PCSK1N	X	48691769	0.157026	0.1217	0.0202362	1.81001e-09	0.00392103
	rs138193887	G	A	11	107967350	intronic	CUL5	HIST1H3D	6	26198294	0.0723401	-0.170865	0.0228109	6.86117e-14	0.00391837
	rs1354034	T	C	3	56849749	intronic	ARHGEF3	CLIP2	7	73762039	0.381863	-0.0910178	0.00818822	1.05222e-28	0.00391089
	rs149110519	T	C	6	144385777	upstream	PLAGL1	DICER1	14	95588456	0.0526158	0.198024	0.0197039	9.18674e-24	0.00390937
	rs55908509	A	G	19	16442019	intergenic	KLF2;EPS15L1	SIGLEC17P	19	51673682	0.3284	0.0941387	0.0102316	3.55295e-20	0.00390913
	rs7310615	G	C	12	111865049	intronic	SH2B3	APOL3	22	36549298	0.537476	-0.0886263	0.00839638	4.80103e-26	0.00390525
	rs56388170	T	G	7	28724374	intronic	CREB5	MSN	X	64924664	0.289189	-0.0974481	0.0162389	1.96227e-09	0.00390403
	rs11602954	A	G	11	202856	downstream	BET1L	SPARC	5	151053691	0.211758	0.108135	0.0106901	4.72085e-24	0.00390356
	rs4822024	A	G	22	41757647	intergenic	ZC3H7B;TEF	CHN1	2	175767094	0.224124	0.105921	0.00952501	9.99354e-29	0.00390188
	rs7310615	G	C	12	111865049	intronic	SH2B3	IRF4	6	401593	0.537476	0.0885644	0.0083964	5.19451e-26	0.00389979
	rs111778408	A	G	14	35572163	ncRNA_intronic	LOC101927178	REPS2	X	17068104	0.100785	-0.146635	0.0244566	2.02611e-09	0.00389729
	rs149110519	T	C	6	144385777	upstream	PLAGL1	CASP4	11	104826878	0.0526158	-0.197682	0.019704	1.09592e-23	0.0038959
	rs477515	A	G	6	32569691	intergenic	HLA-DRB1;HLA-DQA1	RPL34	4	109546645	0.265286	0.0999363	0.0099217	7.3096e-24	0.00389322
	rs7846314	T	A	8	61650831	intronic	CHD7	SLPI	20	43882042	0.178349	0.11519	0.0104113	1.87752e-28	0.00388882
	rs9600235	T	C	13	74704287	intronic	KLF12	L1CAM	X	153150823	0.144868	0.125282	0.0209183	2.11005e-09	0.00388875
	rs8067378	A	G	17	38051348	intergenic	ZPBP2;GSDMB	NCAM1	11	112990577	0.502612	0.0881898	0.00797816	2.09894e-28	0.00388861
	rs6592965	A	G	7	50427982	intronic	IKZF1	TMOD1	9	100313742	0.449532	0.0886238	0.00797027	1.01062e-28	0.00388708
	rs13103322	G	A	4	83895232	intronic	LIN54	HIST1H4H	6	26283522	0.190299	-0.112247	0.0108852	6.22581e-25	0.00388279
	rs4713555	T	G	6	32575524	intergenic	HLA-DRB1;HLA-DQA1	TRAV2	14	22180805	0.265418	0.0997056	0.0175764	1.40564e-08	0.0038765
	rs55793580	T	C	9	127009395	intergenic	LHX2;NEK6	RFX2	19	6096379	0.169838	-0.117215	0.0106143	2.36459e-28	0.00387434
	rs1354034	T	C	3	56849749	intronic	ARHGEF3	SH3KBP1	X	19728906	0.381863	0.0905848	0.0151543	2.26588e-09	0.00387376
	rs35033748	C	T	17	27179590	intergenic	FAM222B;ERAL1	RP11-497H16.2	5	69785194	0.215702	0.106992	0.0127012	3.64466e-17	0.00387318
	rs1354034	T	C	3	56849749	intronic	ARHGEF3	STON2	14	81814904	0.381863	-0.0905621	0.012163	9.64317e-14	0.00387182
	rs35979828	T	C	12	54685880	downstream	NFE2	CCNY	10	35698402	0.0571059	-0.189562	0.0176076	4.98719e-27	0.00386969
	rs8073060	A	T	17	33875262	exonic	SLFN14	PIGQ	16	625565	0.305723	0.0954688	0.00867441	3.58321e-28	0.00386913
	rs55908509	A	G	19	16442019	intergenic	KLF2;EPS15L1	LDB2	4	16701798	0.3284	0.093655	0.0100586	1.26754e-20	0.00386906
	rs3896594	G	T	2	8762414	intergenic	LINC01814;ID2-AS1	ROGDI	16	4849960	0.377086	0.0907168	0.00819557	1.77369e-28	0.00386611
	rs56330463	T	C	5	148200011	intergenic	HTR4;ADRB2	CD55	1	207514582	0.417903	0.0891019	0.00805339	1.87752e-28	0.00386256
	rs592423	A	C	6	139840693	intergenic	LINC01625;FILNC1	BAG6	6	31613643	0.467953	0.0880558	0.0147557	2.40769e-09	0.00386099
	rs149007767	T	C	7	50370254	intronic	IKZF1	DUSP6	12	89744028	0.149708	-0.123119	0.0114057	3.65446e-27	0.00385915
	rs597808	G	A	12	111973358	intronic	ATXN2	EZR	6	159213608	0.52377	0.0879208	0.00939947	8.4554e-21	0.0038563
	rs225245	G	A	17	33946107	intronic	AP2B1	TRIM10	6	30124216	0.440335	-0.0884226	0.0119038	1.10169e-13	0.00385361
	rs505404	G	T	11	243268	intronic	PSMD13	VCL	10	75818895	0.222031	0.105596	0.00955715	2.21917e-28	0.00385213
	rs16895831	T	C	6	42515791	intergenic	TRERF1;UBR2	CACNB4	2	152822441	0.209742	0.107754	0.0103925	3.44896e-25	0.00384905
	rs149290349	A	G	2	43451957	exonic	ZFP36L2	PTK2	8	141840157	0.0763089	-0.165229	0.0161364	1.31916e-24	0.00384862
	rs56330463	T	C	5	148200011	intergenic	HTR4;ADRB2	RGS2	1	192779786	0.417903	0.0889189	0.00808089	3.67175e-28	0.00384671
	rs7846314	T	A	8	61650831	intronic	CHD7	CEP63	3	134249222	0.178349	0.114549	0.0103762	2.46126e-28	0.00384567
	rs12485444	T	A	3	188135783	intronic	LPP	SDSL	12	113868061	0.490804	-0.0876839	0.00798724	4.87599e-28	0.00384294
	rs4810485	T	G	20	44747947	intronic	CD40	COL19A1	6	70748071	0.253174	0.100744	0.0135902	1.23474e-13	0.00383802
	rs149110519	T	C	6	144385777	upstream	PLAGL1	SIGLEC5	19	52132466	0.0526158	0.196184	0.021992	4.6335e-19	0.00383705
	rs145171343	T	C	17	33886764	UTR5	SLFN14	VCL	10	75818895	0.0138172	0.375166	0.0418665	3.21747e-19	0.00383579
	rs13194491	T	C	6	27037080	intergenic	LINC00240;H2BC11	ALAS2	X	55046492	0.0577395	-0.187741	0.0315659	2.72103e-09	0.00383525
	rs7359397	T	C	16	28885659	downstream	SH2B1	STAT1	2	191857385	0.38334	-0.0900671	0.00821983	6.1301e-28	0.00383524
	rs149007767	T	C	7	50370254	intronic	IKZF1	STAT6	12	57507556	0.149708	0.12264	0.0114059	5.77394e-27	0.00382922
	rs11795343	C	T	9	32523737	intronic	DDX58	MX1	21	42811686	0.389022	-0.0897171	0.00813266	2.68736e-28	0.00382631
	rs225245	G	A	17	33946107	intronic	AP2B1	ECSIT	19	11628360	0.440335	-0.0881027	0.00805621	7.75463e-28	0.00382578
	rs2014300	A	G	21	36357861	intronic	RUNX1	IRX3	16	54318945	0.143128	-0.124871	0.0119305	1.23111e-25	0.00382465
	rs56388170	T	G	7	28724374	intronic	CREB5	WWC3	X	10048060	0.289189	0.0964306	0.0162396	2.8852e-09	0.00382293
	rs56330463	T	C	5	148200011	intergenic	HTR4;ADRB2	CPEB2	4	15038037	0.417903	0.0885864	0.00808101	5.80061e-28	0.00381799
	rs1354034	T	C	3	56849749	intronic	ARHGEF3	ELF4	X	129221770	0.381863	0.0899054	0.0151547	2.98356e-09	0.00381587
	rs1532624	A	C	16	57005479	intronic	CETP	HLA-B	6	31323307	0.437102	-0.0880579	0.0156467	1.82417e-08	0.00381575
	rs7607369	A	G	2	219279097	intergenic	CTDSP1;VIL1	HIST1H3D	6	26198294	0.417697	0.088562	0.0119824	1.45729e-13	0.00381536
	rs13165424	G	A	5	154353012	intergenic	MRPL22;KIF4B	EIF3E	8	109330503	0.271036	0.0982258	0.0148087	3.28932e-11	0.00381254
	rs11190133	T	C	10	101278725	intergenic	GOT1;LINC01475	ENSG00000198353	12	54430264	0.306588	-0.0946656	0.00959562	5.87411e-23	0.00381031
	rs28453840	G	A	2	136522941	intronic	UBXN4	ENSG00000111249	12	111630093	0.31882	-0.0936494	0.015873	3.63722e-09	0.00380932
	rs11190133	T	C	10	101278725	intergenic	GOT1;LINC01475	CCDC50	3	191081662	0.306588	0.0946235	0.00942156	9.83284e-24	0.00380693
	rs4917014	G	T	7	50305863	intergenic	SPATA48;IKZF1	ENSG00000111249	12	111630093	0.316454	-0.0937858	0.015831	3.13821e-09	0.00380525
	rs9420589	T	G	10	94450233	intronic	HHEX	IGFBP7	4	57936745	0.428682	0.088138	0.00806467	8.38588e-28	0.00380513
	rs28453840	G	A	2	136522941	intronic	UBXN4	ENSG00000070915	16	56924440	0.31882	-0.0935766	0.0158731	3.74001e-09	0.0038034
	rs4822024	A	G	22	41757647	intergenic	ZC3H7B;TEF	EPHX1	1	226015527	0.224124	0.104569	0.00952548	4.8868e-28	0.0038029
	rs7846314	T	A	8	61650831	intronic	CHD7	EFHC2	X	44105025	0.178349	0.113909	0.0192339	3.1747e-09	0.00380281
	rs56388170	T	G	7	28724374	intronic	CREB5	PPIF	10	81111159	0.289189	0.0961547	0.00879097	7.59385e-28	0.00380108
	rs111778408	A	G	14	35572163	ncRNA_intronic	LOC101927178	NFKB2	10	104158074	0.100785	-0.144792	0.0135464	1.15095e-26	0.00379994
	rs149007767	T	C	7	50370254	intronic	IKZF1	VSIG4	X	65250773	0.149708	-0.122168	0.0220815	3.15518e-08	0.00379979
	rs4917014	G	T	7	50305863	intergenic	SPATA48;IKZF1	LAMP5	20	9503089	0.316454	-0.093695	0.00953911	9.03499e-23	0.00379788
	rs8067378	A	G	17	38051348	intergenic	ZPBP2;GSDMB	TCL1A	14	96178418	0.502612	0.0871211	0.00807574	3.92232e-27	0.00379494
	rs149007767	T	C	7	50370254	intronic	IKZF1	PRKCD	3	53208379	0.149708	-0.122052	0.0114061	1.01121e-26	0.00379255
	rs8073060	A	T	17	33875262	exonic	SLFN14	C2orf88	2	190906272	0.305723	-0.0945126	0.00870466	1.83308e-27	0.00379202
	rs149007767	T	C	7	50370254	intronic	IKZF1	PBX2	6	32154964	0.149708	0.122008	0.0220816	3.28923e-08	0.00378981
	rs141094656	C	T	1	92753336	intronic	GLMN	MS4A4A	11	60062229	0.0195137	-0.314613	0.0348667	1.82507e-19	0.0037876
	rs592423	A	C	6	139840693	intergenic	LINC01625;FILNC1	CREG1	1	167510959	0.467953	-0.0872109	0.00796076	6.2809e-28	0.00378725
	rs8073060	A	T	17	33875262	exonic	SLFN14	PDZK1IP1	1	47652990	0.305723	0.094437	0.00867477	1.33826e-27	0.00378596
	rs1354034	T	C	3	56849749	intronic	ARHGEF3	NEURL3	2	97168614	0.381863	-0.0894961	0.00834439	7.74354e-27	0.00378121
	rs1354034	T	C	3	56849749	intronic	ARHGEF3	ADCY3	2	25092373	0.381863	-0.0894865	0.00890537	9.31818e-24	0.0037804
	rs149007767	T	C	7	50370254	intronic	IKZF1	AKAP13	15	86108194	0.149708	-0.121855	0.0114061	1.21861e-26	0.00378035
	rs592423	A	C	6	139840693	intergenic	LINC01625;FILNC1	ITLN1	1	160850644	0.467953	-0.0871281	0.0118435	1.88654e-13	0.00378006
	rs11602954	A	G	11	202856	downstream	BET1L	PDLIM1	10	97024055	0.211758	0.106364	0.0106908	2.54474e-23	0.00377674
	rs35979828	T	C	12	54685880	downstream	NFE2	IL2RG	X	70329606	0.0571059	0.18725	0.0317308	3.60867e-09	0.00377587
	rs10512472	C	T	17	33884804	exonic	SLFN14	CLU	8	27463491	0.179037	0.113331	0.0104054	1.264e-27	0.00377569
	rs149007767	T	C	7	50370254	intronic	IKZF1	ACVRL1	12	52308918	0.149708	-0.12175	0.0128116	2.03733e-21	0.00377383
	rs3774937	C	T	4	103434253	intronic	NFKB1	ARAP3	5	141047378	0.320593	0.0930566	0.00851122	7.98012e-28	0.00377232
	rs6592965	A	G	7	50427982	intronic	IKZF1	EMID1	22	29628713	0.449532	-0.0872764	0.00797074	6.67417e-28	0.00376978
	rs149007767	T	C	7	50370254	intronic	IKZF1	RP11-389C8.2	5	71736972	0.149708	-0.121681	0.0136495	4.89139e-19	0.00376957
	rs28453840	G	A	2	136522941	intronic	UBXN4	IRF8	16	85944312	0.31882	-0.0931556	0.00938784	3.30665e-23	0.00376925
	rs55793580	T	C	9	127009395	intergenic	LHX2;NEK6	VIM	10	17274925	0.169838	-0.11557	0.0157384	2.08547e-13	0.00376635
	rs628751	C	A	6	139838419	intergenic	LINC01625;FILNC1	PTMS	12	6877399	0.494381	0.0867824	0.00793055	7.19431e-28	0.00376512
	rs3735485	A	G	7	45009341	exonic	MYO1G	DEFA4	8	6794602	0.162786	0.117479	0.0199448	3.85729e-09	0.00376186
	rs8073060	A	T	17	33875262	exonic	SLFN14	TSC22D1	13	45079469	0.305723	-0.0941324	0.00878674	8.84483e-27	0.00376157
	rs141094656	C	T	1	92753336	intronic	GLMN	PRUNE2	9	79373647	0.0195137	-0.313473	0.0346943	1.63553e-19	0.00376021
	rs1532624	A	C	16	57005479	intronic	CETP	HCP5	6	31406881	0.437102	-0.0873817	0.011914	2.22717e-13	0.00375737
	rs1532331	G	T	5	43116830	intergenic	LOC100506639;ZNF131	WRN	8	30961301	0.316115	-0.09322	0.00852773	8.158e-28	0.00375731
	rs6084653	G	C	20	4157072	intronic	SMOX	NPRL3	16	161566	0.36636	-0.0899299	0.00825742	1.27515e-27	0.00375482
	rs12458462	A	C	18	77472436	intronic	CTDP1	POLR2A	17	7402809	0.38712	0.088946	0.00828237	6.66191e-27	0.00375408
	rs35033748	C	T	17	27179590	intergenic	FAM222B;ERAL1	OR2W3	1	248045863	0.215702	-0.105319	0.0115596	8.17014e-20	0.00375298
	rs9376092	A	C	6	135427144	intergenic	HBS1L;MYB	GYPB	4	144989550	0.27571	0.096924	0.0132245	2.31703e-13	0.00375196
	rs10820606	C	A	9	99192919	intergenic	ZNF367;HABP4	RAB27B	18	52473919	0.236914	0.101866	0.0103246	5.82746e-23	0.00375188
	rs2594836	G	A	5	173205318	intergenic	LINC01484;LINC01485	LMNB1	5	126142513	0.250349	-0.0999769	0.0136415	2.32049e-13	0.00375175
	rs1375493	G	A	2	182323766	intronic	ITGA4	CAMP	3	48265909	0.434923	-0.0873584	0.00801269	1.12133e-27	0.0037511
	rs10876550	G	A	12	54712308	intergenic	NFE2;COPZ1	CTTN	11	70263600	0.409936	-0.0880489	0.00806198	9.09807e-28	0.00375053
	rs28421666	G	A	6	32592737	intergenic	HLA-DRB1;HLA-DQA1	XPO5	6	43516942	0.0452797	-0.208241	0.020897	2.16656e-23	0.00374923
	rs17534202	G	C	1	203281175	intergenic	BTG2;FMOD	TTC25	17	40102268	0.464034	-0.0867825	0.0080935	7.98163e-27	0.00374612
	rs79755767	A	G	12	54698408	intergenic	NFE2;COPZ1	GSPT1	16	11985962	0.0977363	-0.145739	0.0135549	5.81163e-27	0.00374604
	rs1375493	G	A	2	182323766	intronic	ITGA4	CRISP3	6	49703623	0.434923	-0.0872929	0.00801272	1.22706e-27	0.00374549
	rs17825630	A	G	3	56950055	intronic	ARHGEF3	PARVB	22	44480098	0.108121	0.139345	0.0127686	9.97941e-28	0.00374478
	rs35979828	T	C	12	54685880	downstream	NFE2	TREML3P	6	41183337	0.0571059	-0.186446	0.0192028	2.75221e-22	0.00374353
	rs149110519	T	C	6	144385777	upstream	PLAGL1	ARRDC2	19	18118426	0.0526158	0.193599	0.0197056	8.82236e-23	0.00373663
	rs55908509	A	G	19	16442019	intergenic	KLF2;EPS15L1	LRRC8A	9	131662354	0.3284	-0.092032	0.00997388	2.77539e-20	0.00373612
	rs13062095	C	T	3	101267385	intergenic	FAM172BP;TRMT10C	PI3	20	43804351	0.350092	-0.0905614	0.00832771	1.52155e-27	0.00373207
	rs6074022	C	T	20	44740196	intergenic	NCOA5;CD40	FCER2	19	7760338	0.253232	0.0992854	0.00917381	2.68742e-27	0.00372825
	rs114694170	C	T	5	88180196	ncRNA_intronic	MEF2C-AS1	SPOCD1	1	32268837	0.0523176	0.193874	0.0182909	2.99578e-26	0.00372717
	rs2594836	G	A	5	173205318	intergenic	LINC01484;LINC01485	PPP1R18	6	30649919	0.250349	-0.0996462	0.0179162	2.67006e-08	0.00372697
	rs149007767	T	C	7	50370254	intronic	IKZF1	IGSF23	19	45128510	0.149708	-0.120988	0.0136498	7.74019e-19	0.00372672
	rs55793580	T	C	9	127009395	intergenic	LHX2;NEK6	MPP7	10	28481668	0.169838	-0.114826	0.0157388	2.9711e-13	0.00371797
	rs7570971	A	C	2	135837906	intronic	RAB3GAP1	SCAMP5	15	75281698	0.441154	-0.0868085	0.00895597	3.23535e-22	0.00371566
	rs8073060	A	T	17	33875262	exonic	SLFN14	TSPAN5	4	99485649	0.305723	0.093546	0.00867508	4.12805e-27	0.00371485
	rs56388170	T	G	7	28724374	intronic	CREB5	SLPI	20	43882042	0.289189	0.0950227	0.00882152	4.68274e-27	0.00371211
	rs17761864	A	C	17	2171637	intronic	SMG6	CARNS1	11	67187758	0.323707	0.0920129	0.00934056	6.79329e-23	0.00370693
	rs628751	C	A	6	139838419	intergenic	LINC01625;FILNC1	GATA1	X	48648840	0.494381	0.0860992	0.0147274	5.02929e-09	0.00370607
	rs11212617	C	A	11	108283161	intronic	C11orf65	HIST1H2BE	6	26184206	0.434293	0.0868465	0.00916025	2.52341e-21	0.00370603
	rs7606173	C	G	2	60725451	intronic	BCL11A	PLVAP	19	17475208	0.393094	-0.0881293	0.00816049	3.46083e-27	0.00370585
	rs35979828	T	C	12	54685880	downstream	NFE2	CDS2	20	5142982	0.0571059	-0.185481	0.0176726	9.06928e-26	0.00370486
	rs8073060	A	T	17	33875262	exonic	SLFN14	TNFSF4	1	173164662	0.305723	-0.0933401	0.00870507	7.98163e-27	0.00369852
	rs56388170	T	G	7	28724374	intronic	CREB5	DOK4	16	57513551	0.289189	-0.0948349	0.00879142	3.95661e-27	0.00369745
	rs1354034	T	C	3	56849749	intronic	ARHGEF3	SURF4	9	136235647	0.381863	0.0884771	0.0151556	5.28629e-09	0.00369559
	rs35979828	T	C	12	54685880	downstream	NFE2	AQP10	1	154295683	0.0571059	0.185218	0.0176727	1.06181e-25	0.00369439
	rs6136489	G	T	20	1923734	intergenic	SIRPA;PDYN-AS1	ACRBP	12	6751933	0.344366	-0.0904292	0.00839593	4.73903e-27	0.00369257
	rs6986779	T	C	8	142337790	intergenic	SLC45A4;LINC01300	AVIL	12	58201823	0.349935	-0.0900747	0.0123909	3.61088e-13	0.00369131
	rs149007767	T	C	7	50370254	intronic	IKZF1	HIVEP1	6	12087113	0.149708	0.120364	0.0114067	4.96742e-26	0.0036884
	rs7075195	G	A	10	65050659	intronic	JMJD1C	45174	22	19707141	0.421253	0.086973	0.00805783	3.69044e-27	0.00368834
	rs4982731	C	T	14	23585333	intergenic	LMLN2;CEBPE	GATA2	3	128205149	0.278225	-0.0958253	0.00887855	3.71866e-27	0.00368798
	rs7846314	T	A	8	61650831	intronic	CHD7	LETM2	8	38255385	0.178349	0.112171	0.0154383	3.70837e-13	0.00368767
	rs4502545	A	G	3	28303030	intronic	CMC1	GZMK	5	54325239	0.179583	0.111854	0.0103491	3.15129e-27	0.00368667
	rs6084653	G	C	20	4157072	intronic	SMOX	ASCC2	22	30209434	0.36636	-0.0891084	0.00824475	3.15817e-27	0.00368653
	rs653178	T	C	12	112007756	intronic	ATXN2	PARP9	3	122265097	0.539991	-0.0861155	0.00840652	1.2605e-24	0.00368422
	rs8073060	A	T	17	33875262	exonic	SLFN14	ST6GALNAC4	9	130674741	0.305723	0.0931398	0.00867522	6.87445e-27	0.00368266
	rs4328821	G	A	3	128316435	intergenic	LINC01565;RPN1	ENPP3	6	132009067	0.118714	-0.132622	0.0123567	7.13993e-27	0.00368026
	rs3774937	C	T	4	103434253	intronic	NFKB1	REPS2	X	17068104	0.320593	0.0918948	0.0157773	5.72838e-09	0.00367871
	rs10820606	C	A	9	99192919	intergenic	ZNF367;HABP4	JARID2-AS1	6	15248455	0.236914	0.100815	0.012699	2.04147e-15	0.0036749
	rs875741	A	G	5	173287851	intergenic	LINC01485;CPEB4	PLEK2	14	67866308	0.396388	0.0876315	0.00810637	3.07998e-27	0.00367476
	rs2228145	C	A	1	154426970	exonic	IL6R	NRG1	8	32059725	0.36999	0.0887149	0.00826316	6.8819e-27	0.00366911
	rs12466022	A	C	2	43359061	intergenic	LINC02580;ZFP36L2	P2RY10	X	78209140	0.260124	-0.0976099	0.0167844	6.04529e-09	0.00366739
	rs1265564	C	A	12	111708458	intronic	CUX2	UBE2L6	11	57327443	0.421923	0.0867047	0.00808579	7.93001e-27	0.0036672
	rs7743045	A	G	6	119102271	intergenic	CEP85L;SELENOKP3	HIST1H2BJ	6	27097299	0.348266	-0.089862	0.0154556	6.09245e-09	0.00366576
	rs16971217	G	C	17	33944055	intronic	AP2B1	CRAT	9	131865278	0.177288	0.112063	0.0105014	1.38672e-26	0.00366341
	rs149007767	T	C	7	50370254	intronic	IKZF1	ZCCHC6	9	88936008	0.149708	0.119931	0.0114476	1.10767e-25	0.00366189
	rs149110519	T	C	6	144385777	upstream	PLAGL1	GPR65	14	88474943	0.0526158	0.19164	0.0197063	2.36369e-22	0.00366137
	rs3774937	C	T	4	103434253	intronic	NFKB1	FCGBP	19	40397248	0.320593	-0.0916477	0.0085407	7.30408e-27	0.00365896
	rs149007767	T	C	7	50370254	intronic	IKZF1	CXCL6	4	74708497	0.149708	-0.119863	0.0114144	8.54698e-26	0.00365774
	rs11602954	A	G	11	202856	downstream	BET1L	MAOB	X	43683775	0.211758	0.104648	0.0180231	6.38685e-09	0.00365584
	rs17081935	T	C	4	57823476	intergenic	REST;NOA1	CACNA1E	1	181579728	0.202608	0.106367	0.00992552	8.51654e-27	0.0036557
	rs9944715	A	G	18	43831259	intronic	C18orf25	TMEM158	3	45266864	0.259134	-0.0975059	0.00906626	5.62559e-27	0.00365053
	rs17081935	T	C	4	57823476	intergenic	REST;NOA1	ATP6V0A1	17	40642745	0.202608	0.106278	0.00992555	9.38623e-27	0.00364959
	rs917116	G	T	7	28172739	intronic	JAZF1	ANKRD55	5	55462346	0.250264	-0.0985862	0.00920205	8.79717e-27	0.00364728
	rs11627485	C	T	14	65487694	intronic	CHURC1-FNTB;FNTB;MAX	HBM	16	210329	0.426962	0.086328	0.00812323	2.2246e-26	0.00364675
	rs8026803	C	T	15	80260014	exonic	BCL2A1	PLAGL2	20	30787950	0.247924	-0.0988471	0.00918295	5.08008e-27	0.00364366
	rs7665090	G	A	4	103551603	downstream	MANBA	SSTR3	22	37604320	0.494318	-0.0853708	0.00803467	2.2728e-26	0.00364361
	rs56388170	T	G	7	28724374	intronic	CREB5	MMP9	20	44641373	0.289189	-0.0941376	0.00879166	9.3761e-27	0.00364328
	rs9376090	C	T	6	135411228	intergenic	HBS1L;MYB	TPGS2	18	34384572	0.262879	0.0969565	0.0100873	7.13609e-22	0.00364316
	rs11602954	A	G	11	202856	downstream	BET1L	PLXNB3	X	153037226	0.211758	0.104434	0.0180232	6.85659e-09	0.00364093
	rs11553699	G	A	12	122216910	UTR3	RHOF;TMEM120B	TUBB1	20	57598009	0.10963	0.136564	0.0130919	1.78618e-25	0.00364086
	rs9939914	C	T	16	89939929	upstream	TCF25	GPR25	1	200842694	0.252564	0.0981975	0.00920357	1.41385e-26	0.00364063
	rs4766578	A	T	12	111904371	intronic	ATXN2	LGALS3BP	17	76971755	0.531061	-0.0854858	0.008422	3.30346e-24	0.00363981
	rs10423726	C	A	19	16444697	intergenic	KLF2;EPS15L1	RAMP1	2	238794146	0.404467	0.0868917	0.0118575	2.33613e-13	0.00363727
	rs10512472	C	T	17	33884804	exonic	SLFN14	ACVR1	2	158662666	0.179037	0.111214	0.0103429	5.75518e-27	0.00363591
	rs149007767	T	C	7	50370254	intronic	IKZF1	EXTL3	8	28535551	0.149708	-0.119497	0.011407	1.1159e-25	0.00363545
	rs149007767	T	C	7	50370254	intronic	IKZF1	GPBAR1	2	219126400	0.149708	-0.119482	0.011407	1.13134e-25	0.00363455
	rs705705	C	G	12	56435504	upstream	RPS26	ENSG00000229659	10	75182235	0.307877	-0.092345	0.0139942	4.14499e-11	0.00363427
	rs28453840	G	A	2	136522941	intronic	UBXN4	LAMP5	20	9503089	0.31882	-0.0914679	0.00955877	1.07945e-21	0.00363391
	rs72928038	A	G	6	90976768	intronic	BACH2	LRRN3	7	110748286	0.158151	0.116783	0.0113448	7.49947e-25	0.0036316
	rs1354034	T	C	3	56849749	intronic	ARHGEF3	PIM2	X	48773380	0.381863	0.0877025	0.0151561	7.18253e-09	0.00363117
	rs10876550	G	A	12	54712308	intergenic	NFE2;COPZ1	SPARC	5	151053691	0.409936	-0.086587	0.00806248	6.6403e-27	0.00362702
	rs2617170	T	C	12	10560957	exonic	KLRC4	SPON2	4	1181735	0.331973	0.0904246	0.0084718	1.35281e-26	0.0036266
	rs8073060	A	T	17	33875262	exonic	SLFN14	FOXO4	X	70319716	0.305723	0.0923988	0.0159829	7.42138e-09	0.00362429
	rs1354034	T	C	3	56849749	intronic	ARHGEF3	MAN2B1	19	12767440	0.381863	0.0875847	0.0151562	7.52353e-09	0.00362142
	rs1354034	T	C	3	56849749	intronic	ARHGEF3	DNM1	9	130991592	0.381863	-0.0875735	0.00816171	7.37556e-27	0.0036205
	rs12466022	A	C	2	43359061	intergenic	LINC02580;ZFP36L2	WWC3	X	10048060	0.260124	-0.0969627	0.0167849	7.61347e-09	0.00361892
	rs8078723	C	T	17	38166879	intergenic	PSMD3;CSF3	IL1B	2	113590904	0.379928	0.0876201	0.00816971	7.76871e-27	0.00361727
	rs149007767	T	C	7	50370254	intronic	IKZF1	FAM105A	5	14598500	0.149708	-0.119173	0.0114071	1.50756e-25	0.00361577
	rs505404	G	T	11	243268	intronic	PSMD13	ILK	11	6628531	0.222031	0.102277	0.00959086	1.50004e-26	0.00361378
	rs10876550	G	A	12	54712308	intergenic	NFE2;COPZ1	OXTR	3	8801704	0.409936	-0.0864255	0.00806253	8.2537e-27	0.00361351
	rs11189181	G	A	10	99144154	intronic	RRP12	CCDC28A	6	139104556	0.297492	-0.0929721	0.00868971	1.02772e-26	0.00361295
	rs7950696	C	T	11	47481533	intergenic	RAPSN;CELF1	RTN1	14	60200189	0.441548	0.0855858	0.00799994	1.03663e-26	0.00361241
	rs4822024	A	G	22	41757647	intergenic	ZC3H7B;TEF	CLUHP3	16	31716504	0.224124	0.101899	0.0112175	1.04753e-19	0.00361118
	rs4788084	T	C	16	28539848	intergenic	IL27;NUPR1	APOL3	22	36549298	0.419635	-0.0860919	0.00808427	1.75681e-26	0.00361017
	rs149007767	T	C	7	50370254	intronic	IKZF1	SH2D3C	9	130520808	0.149708	0.119038	0.0114479	2.52661e-25	0.00360756
	rs8073060	A	T	17	33875262	exonic	SLFN14	AHSP	16	31539654	0.305723	-0.0921734	0.00867555	2.29237e-26	0.00360663
	rs7310615	G	C	12	111865049	intronic	SH2B3	FOS	14	75747205	0.537476	0.0851579	0.00839764	3.64478e-24	0.00360557
	rs114694170	C	T	5	88180196	ncRNA_intronic	MEF2C-AS1	ABCC3	17	48740875	0.0523176	0.190659	0.018292	1.94508e-25	0.00360459
	rs2594836	G	A	5	173205318	intergenic	LINC01484;LINC01485	DPEP3	16	68012149	0.250349	0.0979903	0.00916997	1.18366e-26	0.00360414
[truncated: 7,885 more rows]

## Sheet: Table S2
	Table S2. Gene pairs identified through Mendelian randomization and the nature of association between them
	Source gene information				Target gene information				Mendelian randomization
	ENSG ID	Chr	Location (bp)	Symbol	ENSG ID	Chr	Location (bp)	Symbol	B	SE	P	NSNP
	ENSG00000076864	1	21959254	RAP1GAP	ENSG00000183508	1	118159775	FAM46C	0.23779	0.0383324	5.52676e-10	4
	ENSG00000076864	1	21959254	RAP1GAP	ENSG00000172331	7	134348062	BPGM	0.286285	0.0347933	1.90111e-16	6
	ENSG00000142687	1	35961321	KIAA0319L	ENSG00000161040	7	102584297	FBXL13	-0.441145	0.0769592	9.91424e-09	3
	ENSG00000233621	1	37930246	RP11-422J8.1	ENSG00000166927	11	60154689	MS4A7	0.0702628	0.0113699	6.42113e-10	3
	ENSG00000233621	1	37930246	RP11-422J8.1	ENSG00000166165	14	103987722	CKB	0.0650702	0.0113164	8.92013e-09	3
	ENSG00000163877	1	38011022	SNIP1	ENSG00000166927	11	60154689	MS4A7	0.373	0.0546681	8.91629e-12	3
	ENSG00000163877	1	38011022	SNIP1	ENSG00000166165	14	103987722	CKB	0.324032	0.0537131	1.61291e-09	3
	ENSG00000198160	1	67422440	MIER1	ENSG00000092096	14	23818818	SLC22A17	0.166108	0.0276646	1.92095e-09	3
	ENSG00000092621	1	120244629	PHGDH	ENSG00000139514	13	30126686	SLC7A1	0.268916	0.0445736	1.60867e-09	5
	ENSG00000143537	1	155029147	ADAM15	ENSG00000158373	6	26164963	HIST1H2BD	0.15734	0.0286026	3.7781e-08	5
	ENSG00000143537	1	155029147	ADAM15	ENSG00000203813	6	27778078	HIST1H3H	0.229087	0.0283204	6.01014e-16	5
	ENSG00000173171	1	155181052	MTX1	ENSG00000203813	6	27778078	HIST1H3H	-0.145612	0.024538	2.95407e-09	3
	ENSG00000163374	1	155644014	YY1AP1	ENSG00000158373	6	26164963	HIST1H2BD	-0.386591	0.0476247	4.76095e-16	4
	ENSG00000163374	1	155644014	YY1AP1	ENSG00000197459	6	26252091	HIST1H2BH	-0.322467	0.0500289	1.15134e-10	3
	ENSG00000196189	1	156132350	SEMA4A	ENSG00000177674	1	11805500	AGTRAP	-0.153463	0.0249976	8.29806e-10	7
	ENSG00000196189	1	156132350	SEMA4A	ENSG00000117676	1	26878886	RPS6KA1	-0.174233	0.0258742	1.65224e-11	5
	ENSG00000196189	1	156132350	SEMA4A	ENSG00000163464	2	219029643	CXCR1	-0.203778	0.026092	5.71996e-15	5
	ENSG00000196189	1	156132350	SEMA4A	ENSG00000135926	2	219148112	TMBIM1	-0.14029	0.0252006	2.59239e-08	6
	ENSG00000196189	1	156132350	SEMA4A	ENSG00000203813	6	27778078	HIST1H3H	-0.658565	0.0648236	3.01108e-24	4
	ENSG00000196189	1	156132350	SEMA4A	ENSG00000112195	6	41163473	TREML2	-0.180856	0.0255356	1.41555e-12	6
	ENSG00000196189	1	156132350	SEMA4A	ENSG00000122694	9	36150321	GLIPR2	-0.156638	0.0253349	6.30227e-10	6
	ENSG00000196189	1	156132350	SEMA4A	ENSG00000178789	17	72522463	CD300LB	-0.16367	0.0247637	3.86165e-11	7
	ENSG00000196189	1	156132350	SEMA4A	ENSG00000129353	19	10734184	SLC44A2	-0.16179	0.0249616	9.07799e-11	7
	ENSG00000196189	1	156132350	SEMA4A	ENSG00000101150	20	62509770	TPD52L2	-0.147154	0.0249862	3.87564e-09	7
	ENSG00000133069	1	205219887	TMCC2	ENSG00000158850	1	161144193	B4GALT3	0.993813	0.114076	2.99065e-18	4
	ENSG00000133069	1	205219887	TMCC2	ENSG00000238243	1	248045863	OR2W3	0.49048	0.0896788	4.51808e-08	4
	ENSG00000133069	1	205219887	TMCC2	ENSG00000115758	2	10584362	ODC1	-0.415569	0.0746207	2.56083e-08	5
	ENSG00000133069	1	205219887	TMCC2	ENSG00000198876	9	34106891	DCAF12	0.580428	0.0778823	9.14917e-14	5
	ENSG00000133069	1	205219887	TMCC2	ENSG00000165006	9	34215762	UBAP1	0.518794	0.0800047	8.90034e-11	5
	ENSG00000133069	1	205219887	TMCC2	ENSG00000136929	9	100698105	HEMGN	-0.534302	0.08281	1.1028e-10	4
	ENSG00000133069	1	205219887	TMCC2	ENSG00000206177	16	210329	HBM	-0.681145	0.09183	1.19394e-13	4
	ENSG00000133069	1	205219887	TMCC2	ENSG00000034152	17	21203268	MAP2K3	0.487469	0.086535	1.7689e-08	4
	ENSG00000133069	1	205219887	TMCC2	ENSG00000108309	17	42390910	RUNDC3A	0.57603	0.0873896	4.35347e-11	4
	ENSG00000238243	1	248045863	OR2W3	ENSG00000172270	19	577395	BSG	0.40302	0.0555918	4.17953e-13	6
	ENSG00000231826	2	43260839	AC016735.2	ENSG00000135838	1	182778973	NPL	-0.205096	0.0356002	8.35687e-09	3
	ENSG00000231826	2	43260839	AC016735.2	ENSG00000138061	2	38315580	CYP1B1	-0.297021	0.0416539	9.98672e-13	3
	ENSG00000231826	2	43260839	AC016735.2	ENSG00000144136	2	113412419	SLC20A1	0.196364	0.0342903	1.02516e-08	3
	ENSG00000231826	2	43260839	AC016735.2	ENSG00000071967	2	172396700	CYBRD1	0.251171	0.03707	1.23901e-11	3
	ENSG00000231826	2	43260839	AC016735.2	ENSG00000196549	3	154821705	MME	-0.194394	0.0340767	1.16617e-08	3
	ENSG00000231826	2	43260839	AC016735.2	ENSG00000113108	5	139955595	APBB3	-0.191358	0.0340744	1.95556e-08	3
	ENSG00000231826	2	43260839	AC016735.2	ENSG00000112299	6	133018958	VNN1	-0.20586	0.0363071	1.42832e-08	3
	ENSG00000231826	2	43260839	AC016735.2	ENSG00000085265	9	137805620	FCN1	-0.272992	0.0360224	3.49848e-14	3
	ENSG00000231826	2	43260839	AC016735.2	ENSG00000149573	11	118129684	MPZL2	0.248511	0.0393064	2.57524e-10	3
	ENSG00000231826	2	43260839	AC016735.2	ENSG00000030582	17	42426542	GRN	-0.257996	0.038443	1.93125e-11	3
	ENSG00000231826	2	43260839	AC016735.2	ENSG00000170866	19	54804903	LILRA3	-0.271733	0.0437204	5.12424e-10	3
	ENSG00000231826	2	43260839	AC016735.2	ENSG00000124107	20	43882042	SLPI	0.190355	0.0331703	9.54002e-09	3
	ENSG00000231826	2	43260839	AC016735.2	ENSG00000064601	20	44523525	CTSA	-0.216924	0.0336247	1.10863e-10	3
	ENSG00000212978	2	61370418	AC016747.3	ENSG00000100558	14	67866308	PLEK2	-0.2393	0.0361952	3.80771e-11	3
	ENSG00000168899	2	85816033	VAMP5	ENSG00000196505	1	118442145	GDAP2	0.224539	0.0401815	2.29534e-08	6
	ENSG00000168899	2	85816033	VAMP5	ENSG00000118217	1	161834972	ATF6	0.255945	0.0441581	6.78702e-09	4
	ENSG00000168899	2	85816033	VAMP5	ENSG00000197965	1	167725792	MPZL1	0.25093	0.0419762	2.26028e-09	5
	ENSG00000168899	2	85816033	VAMP5	ENSG00000115828	2	37586091	QPCT	-0.287653	0.0402215	8.56919e-13	6
	ENSG00000168899	2	85816033	VAMP5	ENSG00000237803	2	38078403	LINC00211	-0.553777	0.0983299	1.78308e-08	6
	ENSG00000168899	2	85816033	VAMP5	ENSG00000244617	2	70188311	ASPRV1	-0.352307	0.0448143	3.7959e-15	6
	ENSG00000168899	2	85816033	VAMP5	ENSG00000138411	2	197261196	HECW2	-0.294035	0.0441248	2.67006e-11	6
	ENSG00000168899	2	85816033	VAMP5	ENSG00000196549	3	154821705	MME	0.307063	0.0441324	3.45688e-12	5
	ENSG00000168899	2	85816033	VAMP5	ENSG00000169429	4	74607828	IL8	-0.319727	0.0454056	1.90081e-12	6
	ENSG00000168899	2	85816033	VAMP5	ENSG00000158373	6	26164963	HIST1H2BD	-0.256042	0.0398855	1.36786e-10	6
	ENSG00000168899	2	85816033	VAMP5	ENSG00000197409	6	26198294	HIST1H3D	-0.334721	0.0609787	4.03897e-08	6
	ENSG00000168899	2	85816033	VAMP5	ENSG00000096063	6	35844931	SRPK1	-0.361526	0.0424424	1.62257e-17	5
	ENSG00000168899	2	85816033	VAMP5	ENSG00000035681	8	59534233	NSMAF	-0.309484	0.0397034	6.44594e-15	6
	ENSG00000168899	2	85816033	VAMP5	ENSG00000129292	8	133824335	PHF20L1	0.232639	0.0398205	5.1521e-09	6
	ENSG00000168899	2	85816033	VAMP5	ENSG00000052749	10	99138621	RRP12	-0.233515	0.0416097	1.99966e-08	5
	ENSG00000168899	2	85816033	VAMP5	ENSG00000072952	11	10655086	MRVI1	-0.327944	0.0410603	1.38399e-15	6
	ENSG00000168899	2	85816033	VAMP5	ENSG00000196668	12	116972775	LINC00173	-0.370423	0.0476768	7.88281e-15	6
	ENSG00000168899	2	85816033	VAMP5	ENSG00000108244	17	39086417	KRT23	-0.313833	0.0444365	1.63517e-12	6
	ENSG00000168899	2	85816033	VAMP5	ENSG00000079385	19	43038421	CEACAM1	-0.365641	0.0427416	1.18204e-17	5
	ENSG00000168890	2	85827995	TMEM150A	ENSG00000115828	2	37586091	QPCT	-0.482602	0.0802463	1.80987e-09	3
	ENSG00000168890	2	85827995	TMEM150A	ENSG00000173559	2	192548022	NABP1	0.52756	0.0885306	2.53667e-09	3
	ENSG00000168890	2	85827995	TMEM150A	ENSG00000138411	2	197261196	HECW2	-0.507538	0.0853273	2.71221e-09	3
	ENSG00000168890	2	85827995	TMEM150A	ENSG00000145491	5	10456888	ROPN1L	-0.538496	0.0930831	7.24631e-09	3
	ENSG00000168890	2	85827995	TMEM150A	ENSG00000158373	6	26164963	HIST1H2BD	-0.496857	0.0793489	3.80884e-10	3
	ENSG00000168890	2	85827995	TMEM150A	ENSG00000091592	17	5462745	NLRP1	0.487444	0.0778666	3.85001e-10	3
	ENSG00000168890	2	85827995	TMEM150A	ENSG00000079385	19	43038421	CEACAM1	-0.476312	0.0827317	8.54654e-09	3
	ENSG00000168890	2	85827995	TMEM150A	ENSG00000100985	20	44641373	MMP9	-0.54121	0.0887371	1.06717e-09	3
	ENSG00000115523	2	85919137	GNLY	ENSG00000244617	2	70188311	ASPRV1	0.282055	0.0514242	4.13762e-08	7
	ENSG00000115523	2	85919137	GNLY	ENSG00000197409	6	26198294	HIST1H3D	0.386672	0.0682745	1.48317e-08	7
	ENSG00000115523	2	85919137	GNLY	ENSG00000052749	10	99138621	RRP12	0.277835	0.0463184	1.99301e-09	7
	ENSG00000115523	2	85919137	GNLY	ENSG00000072952	11	10655086	MRVI1	0.303841	0.0461096	4.41209e-11	7
	ENSG00000115523	2	85919137	GNLY	ENSG00000100697	14	95588456	DICER1	-0.259741	0.0469719	3.2078e-08	7
	ENSG00000115523	2	85919137	GNLY	ENSG00000183576	14	99905649	SETD3	-0.280241	0.0469972	2.47764e-09	7
	ENSG00000115523	2	85919137	GNLY	ENSG00000091592	17	5462745	NLRP1	-0.251251	0.0459633	4.59444e-08	7
	ENSG00000115523	2	85919137	GNLY	ENSG00000167434	17	58237778	CA4	0.256308	0.0460716	2.64786e-08	7
	ENSG00000115523	2	85919137	GNLY	ENSG00000167851	17	72471744	CD300A	0.469048	0.0570232	1.94271e-16	6
	ENSG00000236525	2	103051108	AC007278.2	ENSG00000115415	2	191857385	STAT1	-0.079278	0.013303	2.53126e-09	3
	ENSG00000123636	2	160324346	BAZ2B	ENSG00000146426	6	155366344	TIAM2	-0.232406	0.0271787	1.21992e-17	4
	ENSG00000123636	2	160324346	BAZ2B	ENSG00000136867	9	115919819	SLC31A2	-0.167527	0.0270775	6.13331e-10	4
	ENSG00000123636	2	160324346	BAZ2B	ENSG00000148180	9	124032599	GSN	0.167182	0.0261037	1.5083e-10	5
	ENSG00000123636	2	160324346	BAZ2B	ENSG00000007237	17	9957897	GAS7	-0.196465	0.0263883	9.68352e-14	5
	ENSG00000123636	2	160324346	BAZ2B	ENSG00000141401	18	12005950	IMPA2	-0.209041	0.0267327	5.29505e-15	4
	ENSG00000241399	2	160640058	CD302	ENSG00000146426	6	155366344	TIAM2	0.211881	0.0333678	2.15475e-10	3
	ENSG00000115232	2	182361421	ITGA4	ENSG00000158473	1	158152211	CD1D	-0.106803	0.0157118	1.06351e-11	3
	ENSG00000115232	2	182361421	ITGA4	ENSG00000068724	2	47223286	TTC7A	-0.130499	0.017244	3.79674e-14	3
	ENSG00000115232	2	182361421	ITGA4	ENSG00000091436	2	174036450	MLTK	-0.0918397	0.0160354	1.02044e-08	3
	ENSG00000115232	2	182361421	ITGA4	ENSG00000093167	3	37159648	LRRFIP2	-0.103007	0.015701	5.36024e-11	3
	ENSG00000115232	2	182361421	ITGA4	ENSG00000012223	3	46501930	LTF	-0.181352	0.0157287	9.30959e-31	3
	ENSG00000115232	2	182361421	ITGA4	ENSG00000114204	3	167178184	ENSG00000114204	-0.18036	0.0245836	2.19073e-13	3
	ENSG00000115232	2	182361421	ITGA4	ENSG00000173085	4	84194378	COQ2	-0.085849	0.0157276	4.80146e-08	3
	ENSG00000115232	2	182361421	ITGA4	ENSG00000164023	4	108790961	SGMS2	-0.105553	0.0157951	2.34731e-11	3
	ENSG00000115232	2	182361421	ITGA4	ENSG00000164136	4	142606446	IL15	-0.0957427	0.0157987	1.35978e-09	3
	ENSG00000115232	2	182361421	ITGA4	ENSG00000164125	4	159070048	FAM198B	-0.102799	0.0157327	6.40051e-11	3
	ENSG00000115232	2	182361421	ITGA4	ENSG00000138829	5	127794239	FBN2	-0.0949319	0.0157809	1.792e-09	3
	ENSG00000115232	2	182361421	ITGA4	ENSG00000112799	6	6621778	LY86	-0.105642	0.0156978	1.69971e-11	3
	ENSG00000115232	2	182361421	ITGA4	ENSG00000026652	6	161623052	AGPAT4	-0.115818	0.0157206	1.74108e-13	3
	ENSG00000115232	2	182361421	ITGA4	ENSG00000106546	7	17362011	AHR	-0.116277	0.0157493	1.54762e-13	3
	ENSG00000115232	2	182361421	ITGA4	ENSG00000106066	7	29134957	CPVL	-0.0862133	0.0157022	4.00765e-08	3
	ENSG00000115232	2	182361421	ITGA4	ENSG00000179869	7	48449073	ABCA13	-0.0888075	0.0157497	1.71364e-08	3
	ENSG00000115232	2	182361421	ITGA4	ENSG00000135218	7	80153742	CD36	-0.0867948	0.0157065	3.27555e-08	3
	ENSG00000115232	2	182361421	ITGA4	ENSG00000092964	8	26443742	DPYSL2	-0.150986	0.0157193	7.60809e-22	3
	ENSG00000115232	2	182361421	ITGA4	ENSG00000165092	9	75605468	ALDH1A1	-0.144361	0.0157576	5.12337e-20	3
	ENSG00000115232	2	182361421	ITGA4	ENSG00000135046	9	75775991	ANXA1	-0.118302	0.0157519	5.89971e-14	3
	ENSG00000115232	2	182361421	ITGA4	ENSG00000119457	9	115647196	SLC46A2	-0.119198	0.0157762	4.16987e-14	3
	ENSG00000115232	2	182361421	ITGA4	ENSG00000148346	9	130913542	LCN2	-0.241519	0.023548	1.10712e-24	3
	ENSG00000115232	2	182361421	ITGA4	ENSG00000085265	9	137805620	FCN1	-0.0938815	0.0157017	2.24429e-09	3
	ENSG00000115232	2	182361421	ITGA4	ENSG00000026025	10	17274925	VIM	-0.150353	0.0234993	1.57215e-10	3
	ENSG00000115232	2	182361421	ITGA4	ENSG00000187164	10	118764919	KIAA1598	-0.0887332	0.0157018	1.59362e-08	3
	ENSG00000115232	2	182361421	ITGA4	ENSG00000026508	11	35207183	CD44	-0.12294	0.0157713	6.43186e-15	3
	ENSG00000115232	2	182361421	ITGA4	ENSG00000166927	11	60154689	MS4A7	-0.100203	0.0157625	2.05648e-10	3
	ENSG00000115232	2	182361421	ITGA4	ENSG00000166928	11	60165582	MS4A14	-0.146826	0.01717	1.21659e-17	3
	ENSG00000115232	2	182361421	ITGA4	ENSG00000124942	11	62262361	AHNAK	-0.110149	0.0158595	3.77623e-12	3
	ENSG00000115232	2	182361421	ITGA4	ENSG00000084207	11	67352598	GSTP1	-0.0967842	0.0157097	7.23825e-10	3
	ENSG00000115232	2	182361421	ITGA4	ENSG00000118113	11	102590153	MMP8	-0.144188	0.0160732	2.94597e-19	3
	ENSG00000115232	2	182361421	ITGA4	ENSG00000184232	11	120091258	OAF	-0.133614	0.0157305	1.99702e-17	3
	ENSG00000115232	2	182361421	ITGA4	ENSG00000123384	12	57564705	LRP1	-0.0932314	0.01579	3.53837e-09	3
	ENSG00000115232	2	182361421	ITGA4	ENSG00000102837	13	53614513	OLFM4	-0.104193	0.0157978	4.2407e-11	3
	ENSG00000115232	2	182361421	ITGA4	ENSG00000155465	14	23270730	SLC7A7	-0.139433	0.0158836	1.65735e-18	3
	ENSG00000115232	2	182361421	ITGA4	ENSG00000172183	15	89189549	ISG20	0.0908024	0.0159429	1.23018e-08	3
	ENSG00000115232	2	182361421	ITGA4	ENSG00000159713	16	67425575	TPPP3	-0.0986152	0.0157068	3.41849e-10	3
	ENSG00000115232	2	182361421	ITGA4	ENSG00000159714	16	67439529	ZDHHC1	-0.106688	0.0157649	1.31056e-11	3
	ENSG00000115232	2	182361421	ITGA4	ENSG00000140836	16	72955190	ZFHX3	-0.129071	0.0157872	2.94104e-16	3
	ENSG00000115232	2	182361421	ITGA4	ENSG00000153786	16	85026464	ZDHHC7	-0.0860878	0.0157084	4.24433e-08	3
	ENSG00000115232	2	182361421	ITGA4	ENSG00000141505	17	7079816	ASGR1	-0.11844	0.0157191	4.89253e-14	3
	ENSG00000115232	2	182361421	ITGA4	ENSG00000007237	17	9957897	GAS7	-0.123729	0.0157825	4.5194e-15	3
	ENSG00000115232	2	182361421	ITGA4	ENSG00000121064	17	55069797	SCPEP1	-0.128658	0.0157219	2.76012e-16	3
	ENSG00000115232	2	182361421	ITGA4	ENSG00000104918	19	7734632	RETN	-0.0966706	0.0157048	7.48574e-10	3
	ENSG00000115232	2	182361421	ITGA4	ENSG00000100079	22	37972439	LGALS2	-0.128306	0.0157324	3.47569e-16	3
	ENSG00000115232	2	182361421	ITGA4	ENSG00000100097	22	38073714	LGALS1	-0.0884879	0.0157007	1.74116e-08	3
	ENSG00000115232	2	182361421	ITGA4	ENSG00000198951	22	42460602	NAGA	-0.0895094	0.0158334	1.57487e-08	3
	ENSG00000115232	2	182361421	ITGA4	ENSG00000100300	22	43553384	TSPO	-0.0996691	0.0164433	1.34958e-09	3
	ENSG00000188452	2	182473397	CERKL	ENSG00000068724	2	47223286	TTC7A	-0.334115	0.0446978	7.72159e-14	3
	ENSG00000188452	2	182473397	CERKL	ENSG00000115919	2	143717478	KYNU	-0.243006	0.0393796	6.79212e-10	3
	ENSG00000188452	2	182473397	CERKL	ENSG00000091436	2	174036450	MLTK	-0.227103	0.0406704	2.35051e-08	3
	ENSG00000188452	2	182473397	CERKL	ENSG00000093167	3	37159648	LRRFIP2	-0.258927	0.0393025	4.45645e-11	3
	ENSG00000188452	2	182473397	CERKL	ENSG00000114204	3	167178184	ENSG00000114204	-0.458903	0.0627427	2.59224e-13	3
	ENSG00000188452	2	182473397	CERKL	ENSG00000164023	4	108790961	SGMS2	-0.274864	0.0400845	7.02626e-12	3
	ENSG00000188452	2	182473397	CERKL	ENSG00000109436	4	141609596	TBC1D9	-0.243847	0.0432438	1.71161e-08	3
	ENSG00000188452	2	182473397	CERKL	ENSG00000164125	4	159070048	FAM198B	-0.241431	0.0393905	8.83375e-10	3
	ENSG00000188452	2	182473397	CERKL	ENSG00000170458	5	140012299	CD14	-0.262285	0.0392146	2.2555e-11	3
	ENSG00000188452	2	182473397	CERKL	ENSG00000112799	6	6621778	LY86	-0.251504	0.0388709	9.7857e-11	3
	ENSG00000188452	2	182473397	CERKL	ENSG00000026652	6	161623052	AGPAT4	-0.283521	0.0389819	3.5124e-13	3
	ENSG00000188452	2	182473397	CERKL	ENSG00000106066	7	29134957	CPVL	-0.21373	0.0390534	4.43077e-08	3
	ENSG00000188452	2	182473397	CERKL	ENSG00000135046	9	75775991	ANXA1	-0.29866	0.0401608	1.03307e-13	3
	ENSG00000188452	2	182473397	CERKL	ENSG00000119457	9	115647196	SLC46A2	-0.308093	0.0398997	1.14799e-14	3
	ENSG00000188452	2	182473397	CERKL	ENSG00000085265	9	137805620	FCN1	-0.236809	0.0398407	2.78308e-09	3
	ENSG00000188452	2	182473397	CERKL	ENSG00000026025	10	17274925	VIM	-0.411201	0.0600178	7.31764e-12	3
	ENSG00000188452	2	182473397	CERKL	ENSG00000107551	10	45472513	RASSF4	-0.240001	0.0388004	6.18928e-10	3
	ENSG00000188452	2	182473397	CERKL	ENSG00000026508	11	35207183	CD44	-0.331298	0.0412355	9.41256e-16	3
	ENSG00000188452	2	182473397	CERKL	ENSG00000166927	11	60154689	MS4A7	-0.237933	0.0392398	1.33124e-09	3
	ENSG00000188452	2	182473397	CERKL	ENSG00000166928	11	60165582	MS4A14	-0.367203	0.0435504	3.40762e-17	3
	ENSG00000188452	2	182473397	CERKL	ENSG00000124942	11	62262361	AHNAK	-0.28796	0.0412559	2.95506e-12	3
	ENSG00000188452	2	182473397	CERKL	ENSG00000084207	11	67352598	GSTP1	-0.222755	0.0389787	1.09848e-08	3
	ENSG00000188452	2	182473397	CERKL	ENSG00000184232	11	120091258	OAF	-0.330748	0.0392206	3.36893e-17	3
	ENSG00000188452	2	182473397	CERKL	ENSG00000121316	12	14688939	PLBD1	-0.262138	0.0427136	8.40444e-10	3
	ENSG00000188452	2	182473397	CERKL	ENSG00000139117	12	39170928	CPNE8	-0.261465	0.0391646	2.45459e-11	3
	ENSG00000188452	2	182473397	CERKL	ENSG00000155465	14	23270730	SLC7A7	-0.326131	0.0395047	1.51266e-16	3
	ENSG00000188452	2	182473397	CERKL	ENSG00000172183	15	89189549	ISG20	0.224468	0.0397879	1.6846e-08	3
	ENSG00000188452	2	182473397	CERKL	ENSG00000159713	16	67425575	TPPP3	-0.24908	0.040413	7.12189e-10	3
	ENSG00000188452	2	182473397	CERKL	ENSG00000159714	16	67439529	ZDHHC1	-0.245033	0.0389991	3.32012e-10	3
	ENSG00000188452	2	182473397	CERKL	ENSG00000140836	16	72955190	ZFHX3	-0.341275	0.0410596	9.43441e-17	3
	ENSG00000188452	2	182473397	CERKL	ENSG00000153786	16	85026464	ZDHHC7	-0.224532	0.0401027	2.15667e-08	3
	ENSG00000188452	2	182473397	CERKL	ENSG00000141505	17	7079816	ASGR1	-0.289113	0.0394978	2.48487e-13	3
	ENSG00000188452	2	182473397	CERKL	ENSG00000007237	17	9957897	GAS7	-0.2816	0.0390483	5.53012e-13	3
	ENSG00000188452	2	182473397	CERKL	ENSG00000100079	22	37972439	LGALS2	-0.331672	0.04072	3.78691e-16	3
	ENSG00000138449	2	190436894	SLC40A1	ENSG00000109107	17	26902207	ALDOC	0.134718	0.0188513	8.91288e-13	6
	ENSG00000127831	2	219300916	VIL1	ENSG00000158373	6	26164963	HIST1H2BD	-0.142856	0.0221012	1.02158e-10	5
	ENSG00000127831	2	219300916	VIL1	ENSG00000197409	6	26198294	HIST1H3D	-0.23389	0.0328405	1.06385e-12	6
	ENSG00000115568	2	219513508	ZNF142	ENSG00000197903	6	27110346	HIST1H2BK	0.22795	0.0369769	7.06337e-10	3
	ENSG00000115568	2	219513508	ZNF142	ENSG00000136098	13	52720385	NEK3	-0.562293	0.0404588	6.51971e-44	3
	ENSG00000115568	2	219513508	ZNF142	ENSG00000125648	19	6450652	SLC25A23	0.323984	0.0588524	3.69118e-08	3
	ENSG00000135912	2	219597853	TTLL4	ENSG00000158373	6	26164963	HIST1H2BD	0.211377	0.0338726	4.36562e-10	5
	ENSG00000135912	2	219597853	TTLL4	ENSG00000197409	6	26198294	HIST1H3D	0.390948	0.050514	9.98775e-15	5
	ENSG00000135912	2	219597853	TTLL4	ENSG00000197903	6	27110346	HIST1H2BK	0.245275	0.0342363	7.82604e-13	5
	ENSG00000135929	2	219663244	CYP27A1	ENSG00000158373	6	26164963	HIST1H2BD	0.0587242	0.00890478	4.26178e-11	22
	ENSG00000135929	2	219663244	CYP27A1	ENSG00000216331	6	26195896	HIST1H1PS1	0.124103	0.0221959	2.25408e-08	22
	ENSG00000135929	2	219663244	CYP27A1	ENSG00000197409	6	26198294	HIST1H3D	0.113803	0.0131859	6.10263e-18	22
	ENSG00000135929	2	219663244	CYP27A1	ENSG00000197903	6	27110346	HIST1H2BK	0.063255	0.00891764	1.31006e-12	21
	ENSG00000135929	2	219663244	CYP27A1	ENSG00000136098	13	52720385	NEK3	-0.130337	0.00896944	7.68406e-48	20
	ENSG00000168395	2	242655171	ING5	ENSG00000163735	4	74862927	CXCL5	0.119265	0.0208852	1.12663e-08	3
	ENSG00000168395	2	242655171	ING5	ENSG00000102804	13	45079469	TSC22D1	-0.131766	0.0211954	5.0768e-10	3
	ENSG00000163508	3	27760823	EOMES	ENSG00000162777	1	111738476	DENND2D	0.360725	0.0435304	1.16395e-16	6
	ENSG00000163508	3	27760823	EOMES	ENSG00000133067	1	202225969	LGR6	0.453665	0.0781614	6.4672e-09	4
	ENSG00000163508	3	27760823	EOMES	ENSG00000008256	7	6256841	CYTH3	0.220365	0.0335257	4.93018e-11	7
	ENSG00000168329	3	39314105	CX3CR1	ENSG00000135047	9	90343371	CTSL	0.635785	0.101141	3.25525e-10	4
	ENSG00000168329	3	39314105	CX3CR1	ENSG00000138166	10	112264449	DUSP5	0.500154	0.086719	8.0445e-09	4
	ENSG00000168329	3	39314105	CX3CR1	ENSG00000148737	10	114818723	TCF7L2	0.552764	0.0905728	1.04104e-09	4
	ENSG00000172215	3	45986135	CXCR6	ENSG00000171735	1	7337575	CAMTA1	0.238154	0.0355521	2.10251e-11	7
	ENSG00000172215	3	45986135	CXCR6	ENSG00000143365	1	151791447	RORC	0.460774	0.0367994	5.71456e-36	7
	ENSG00000172215	3	45986135	CXCR6	ENSG00000162630	1	193151979	B3GALT2	0.237318	0.0351269	1.41833e-11	7
	ENSG00000172215	3	45986135	CXCR6	ENSG00000144290	2	162561317	SLC4A10	0.294668	0.0361518	3.61389e-16	7
	ENSG00000172215	3	45986135	CXCR6	ENSG00000197635	2	162889901	DPP4	0.332494	0.0380694	2.46073e-18	6
	ENSG00000172215	3	45986135	CXCR6	ENSG00000157985	2	236718965	AGAP1	0.197797	0.0350958	1.74133e-08	7
	ENSG00000172215	3	45986135	CXCR6	ENSG00000206561	3	15527449	COLQ	0.326483	0.0396132	1.6967e-16	5
	ENSG00000172215	3	45986135	CXCR6	ENSG00000157111	5	72421881	TMEM171	0.230927	0.0365572	2.66952e-10	6
	ENSG00000172215	3	45986135	CXCR6	ENSG00000118402	6	80640913	ELOVL4	0.277176	0.0357167	8.46517e-15	7
	ENSG00000172215	3	45986135	CXCR6	ENSG00000146250	6	84228808	ENSG00000146250	0.255765	0.0357946	8.97636e-13	7
	ENSG00000172215	3	45986135	CXCR6	ENSG00000112419	6	144005152	PHACTR2	0.221189	0.0362164	1.01248e-09	6
	ENSG00000172215	3	45986135	CXCR6	ENSG00000008256	7	6256841	CYTH3	0.26557	0.0367021	4.62668e-13	6
	ENSG00000172215	3	45986135	CXCR6	ENSG00000085563	7	87237893	ABCB1	0.341318	0.035997	2.49802e-21	7
	ENSG00000172215	3	45986135	CXCR6	ENSG00000152268	11	14136780	SPON1	0.236876	0.0360873	5.23897e-11	7
	ENSG00000172215	3	45986135	CXCR6	ENSG00000137501	11	85463725	SYTL2	0.251556	0.0359583	2.63804e-12	7
	ENSG00000172215	3	45986135	CXCR6	ENSG00000256553	14	22111453	TRAV1-2	0.412683	0.0439091	5.53056e-21	7
	ENSG00000172215	3	45986135	CXCR6	ENSG00000062524	15	41800960	LTK	0.306965	0.0360689	1.73139e-17	7
	ENSG00000172215	3	45986135	CXCR6	ENSG00000069667	15	61151000	RORA	0.191996	0.0351237	4.59588e-08	7
	ENSG00000172215	3	45986135	CXCR6	ENSG00000008283	17	61516702	CYB561	0.203779	0.0366949	2.80291e-08	6
	ENSG00000172215	3	45986135	CXCR6	ENSG00000119537	18	61014851	KDSR	0.257124	0.0357368	6.24885e-13	7
	ENSG00000229515	3	46184509	FLT1P1	ENSG00000062524	15	41800960	LTK	0.0854651	0.0143747	2.75596e-09	3
	ENSG00000163823	3	46246543	CCR1	ENSG00000143365	1	151791447	RORC	-0.126034	0.0157079	1.02681e-15	6
	ENSG00000163823	3	46246543	CCR1	ENSG00000157985	2	236718965	AGAP1	-0.0917471	0.0157459	5.65291e-09	7
	ENSG00000163823	3	46246543	CCR1	ENSG00000118402	6	80640913	ELOVL4	-0.0984985	0.0156999	3.52299e-10	6
	ENSG00000163823	3	46246543	CCR1	ENSG00000085563	7	87237893	ABCB1	-0.103266	0.0156907	4.66125e-11	6
	ENSG00000163823	3	46246543	CCR1	ENSG00000137501	11	85463725	SYTL2	-0.133166	0.0232265	9.84632e-09	6
	ENSG00000163823	3	46246543	CCR1	ENSG00000111796	12	9753814	KLRB1	-0.104723	0.0156843	2.4395e-11	6
	ENSG00000163823	3	46246543	CCR1	ENSG00000119537	18	61014851	KDSR	-0.0903529	0.0157096	8.8486e-09	7
	ENSG00000183625	3	46256646	CCR3	ENSG00000118402	6	80640913	ELOVL4	0.0814505	0.0138319	3.89457e-09	4
	ENSG00000183625	3	46256646	CCR3	ENSG00000085563	7	87237893	ABCB1	0.0870289	0.0138327	3.14389e-10	4
	ENSG00000183625	3	46256646	CCR3	ENSG00000137501	11	85463725	SYTL2	0.0692974	0.0125298	3.19103e-08	7
	ENSG00000121807	3	46398822	CCR2	ENSG00000111796	12	9753814	KLRB1	0.153086	0.0267584	1.05862e-08	8
	ENSG00000121797	3	46449834	CCRL2	ENSG00000171735	1	7337575	CAMTA1	0.357337	0.062603	1.14321e-08	3
	ENSG00000121797	3	46449834	CCRL2	ENSG00000137501	11	85463725	SYTL2	0.38907	0.0626612	5.32868e-10	3
	ENSG00000121797	3	46449834	CCRL2	ENSG00000062524	15	41800960	LTK	0.403819	0.0609333	3.42064e-11	3
	ENSG00000185909	3	49211480	KLHDC8B	ENSG00000141096	16	68012149	DPEP3	-0.231943	0.0378548	8.94498e-10	6
	ENSG00000182179	3	49847009	UBA7	ENSG00000159588	1	46087722	CCDC17	0.122768	0.0207751	3.43359e-09	3
	ENSG00000182179	3	49847009	UBA7	ENSG00000133055	1	203140940	MYBPH	-0.111109	0.0181088	8.48125e-10	3
	ENSG00000182179	3	49847009	UBA7	ENSG00000244617	2	70188311	ASPRV1	-0.15652	0.0198228	2.8815e-15	3
	ENSG00000182179	3	49847009	UBA7	ENSG00000154928	3	134647976	EPHB1	0.0988476	0.0180958	4.69592e-08	3
	ENSG00000182179	3	49847009	UBA7	ENSG00000127084	9	95754125	FGD3	-0.11952	0.0207255	8.07781e-09	3
	ENSG00000182179	3	49847009	UBA7	ENSG00000214688	10	73484519	C10orf105	-0.151749	0.0240369	2.73429e-10	3
	ENSG00000182179	3	49847009	UBA7	ENSG00000135407	12	58201823	AVIL	0.157468	0.0269331	5.0162e-09	3
	ENSG00000182179	3	49847009	UBA7	ENSG00000141096	16	68012149	DPEP3	-0.194467	0.0183494	3.04491e-26	3
	ENSG00000182179	3	49847009	UBA7	ENSG00000105656	19	18593205	ELL	-0.118593	0.0207493	1.0939e-08	3
	ENSG00000182179	3	49847009	UBA7	ENSG00000128011	19	39801592	LRFN1	-0.151148	0.0253997	2.66905e-09	3
	ENSG00000004534	3	50057459	RBM6	ENSG00000159588	1	46087722	CCDC17	0.0704957	0.0120723	5.23665e-09	3
	ENSG00000004534	3	50057459	RBM6	ENSG00000133055	1	203140940	MYBPH	-0.0660732	0.0108226	1.02722e-09	3
	ENSG00000004534	3	50057459	RBM6	ENSG00000244617	2	70188311	ASPRV1	-0.0917576	0.0118265	8.58214e-15	3
	ENSG00000004534	3	50057459	RBM6	ENSG00000154928	3	134647976	EPHB1	0.0603684	0.0108201	2.41548e-08	3
	ENSG00000004534	3	50057459	RBM6	ENSG00000127084	9	95754125	FGD3	-0.0683579	0.0120445	1.38328e-08	3
	ENSG00000004534	3	50057459	RBM6	ENSG00000214688	10	73484519	C10orf105	-0.0851122	0.014366	3.13124e-09	3
	ENSG00000004534	3	50057459	RBM6	ENSG00000135407	12	58201823	AVIL	0.0964934	0.0160817	1.97074e-09	3
	ENSG00000004534	3	50057459	RBM6	ENSG00000141096	16	68012149	DPEP3	-0.121536	0.0108568	4.34391e-29	3
	ENSG00000004534	3	50057459	RBM6	ENSG00000105656	19	18593205	ELL	-0.0730952	0.0120473	1.30047e-09	3
	ENSG00000004534	3	50057459	RBM6	ENSG00000128011	19	39801592	LRFN1	-0.0905283	0.0147639	8.69324e-10	3
	ENSG00000004534	3	50057459	RBM6	ENSG00000100365	22	37265543	NCF4	-0.068427	0.0108236	2.58199e-10	3
	ENSG00000179348	3	128205149	GATA2	ENSG00000143653	1	246909394	SCCPDH	0.393099	0.0436327	2.07421e-19	8
	ENSG00000179348	3	128205149	GATA2	ENSG00000162881	2	42990521	OXER1	0.230807	0.0413621	2.40325e-08	8
	ENSG00000179348	3	128205149	GATA2	ENSG00000116016	2	46567321	EPAS1	0.405746	0.0442254	4.5364e-20	8
	ENSG00000179348	3	128205149	GATA2	ENSG00000113520	5	132014023	IL4	0.410682	0.0447357	4.3036e-20	8
	ENSG00000179348	3	128205149	GATA2	ENSG00000154269	6	132009067	ENPP3	0.565193	0.0481731	8.68075e-32	8
	ENSG00000179348	3	128205149	GATA2	ENSG00000131016	6	151620413	AKAP12	0.526759	0.0456538	8.47572e-31	8
	ENSG00000179348	3	128205149	GATA2	ENSG00000134827	11	59627160	TCN1	0.510756	0.0719926	1.2976e-12	6
	ENSG00000179348	3	128205149	GATA2	ENSG00000149534	11	59859589	MS4A2	0.666879	0.0691184	4.99533e-22	7
	ENSG00000179348	3	128205149	GATA2	ENSG00000005189	16	20839369	AC004381.6	0.314255	0.0439328	8.48542e-13	8
	ENSG00000179348	3	128205149	GATA2	ENSG00000141447	18	21859926	OSBPL1A	0.340546	0.0436286	5.92392e-15	8
	ENSG00000179348	3	128205149	GATA2	ENSG00000105205	19	40225279	CLC	0.469967	0.0447613	8.69411e-26	8
	ENSG00000179348	3	128205149	GATA2	ENSG00000130433	19	54505732	CACNG6	0.470765	0.0488016	5.0852e-22	7
	ENSG00000145214	4	966679	DGKQ	ENSG00000132465	4	71534396	IGJ	-0.0730064	0.0132593	3.67014e-08	5
	ENSG00000127418	4	1012204	FGFRL1	ENSG00000095932	19	3477472	C19orf77	0.568112	0.085146	2.51987e-11	3
	ENSG00000163945	4	1361445	UVSSA	ENSG00000095932	19	3477472	C19orf77	-0.424236	0.0518828	2.91435e-16	5
	ENSG00000231160	4	38640413	RP11-617D20.1	ENSG00000130656	16	203594	HBZ	0.148257	0.0204113	3.77339e-13	3
	ENSG00000231160	4	38640413	RP11-617D20.1	ENSG00000095932	19	3477472	C19orf77	0.118427	0.0216315	4.38162e-08	3
	ENSG00000196355	4	38647229	AC021860.1	ENSG00000130656	16	203594	HBZ	0.0904564	0.0131813	6.7673e-12	3
	ENSG00000196355	4	38647229	AC021860.1	ENSG00000095932	19	3477472	C19orf77	0.079398	0.0138595	1.01159e-08	3
	ENSG00000109320	4	103480472	NFKB1	ENSG00000135916	2	231736658	ITM2C	-0.405332	0.0611073	3.28664e-11	3
	ENSG00000109320	4	103480472	NFKB1	ENSG00000189283	3	60486084	FHIT	0.393206	0.0615704	1.6997e-10	3
	ENSG00000109320	4	103480472	NFKB1	ENSG00000174944	3	150963080	P2RY14	0.466095	0.0623663	7.80832e-14	3
	ENSG00000109320	4	103480472	NFKB1	ENSG00000152492	3	191081662	CCDC50	-0.431036	0.0667817	1.08648e-10	3
	ENSG00000109320	4	103480472	NFKB1	ENSG00000091490	4	25807218	SEL1L3	-0.390057	0.0607215	1.32997e-10	3
	ENSG00000109320	4	103480472	NFKB1	ENSG00000128040	4	57681967	SPINK2	-0.349957	0.064041	4.6401e-08	3
	ENSG00000109320	4	103480472	NFKB1	ENSG00000134352	5	55260872	IL6ST	0.414939	0.0616798	1.72826e-11	3
	ENSG00000109320	4	103480472	NFKB1	ENSG00000164512	5	55462346	ANKRD55	0.628772	0.0673271	9.71907e-21	3
	ENSG00000109320	4	103480472	NFKB1	ENSG00000146021	5	137012484	KLHL3	0.479335	0.0652888	2.10793e-13	3
	ENSG00000109320	4	103480472	NFKB1	ENSG00000135083	5	159725531	CCNJL	-0.330367	0.0583564	1.50324e-08	3
	ENSG00000109320	4	103480472	NFKB1	ENSG00000112394	6	111476502	SLC16A10	0.594713	0.0662057	2.6393e-19	3
	ENSG00000109320	4	103480472	NFKB1	ENSG00000146904	7	143096683	EPHA1	0.418778	0.061713	1.15369e-11	3
	ENSG00000109320	4	103480472	NFKB1	ENSG00000182319	8	8209633	SGK223	0.395916	0.0678407	5.34829e-09	3
	ENSG00000109320	4	103480472	NFKB1	ENSG00000148180	9	124032599	GSN	0.528131	0.0725012	3.2299e-13	3
	ENSG00000109320	4	103480472	NFKB1	ENSG00000173848	10	5477470	NET1	0.518497	0.0707318	2.29357e-13	3
	ENSG00000109320	4	103480472	NFKB1	ENSG00000156395	10	106712926	ENSG00000156395	0.517429	0.0650493	1.79977e-15	3
	ENSG00000109320	4	103480472	NFKB1	ENSG00000099204	10	116317817	ABLIM1	0.452991	0.0640635	1.53864e-12	3
	ENSG00000109320	4	103480472	NFKB1	ENSG00000151929	10	121424106	BAG3	0.400216	0.0617535	9.11984e-11	3
	ENSG00000109320	4	103480472	NFKB1	ENSG00000256862	12	4000202	RP11-664D1.1	0.497742	0.0719801	4.6788e-12	3
	ENSG00000109320	4	103480472	NFKB1	ENSG00000179715	12	47551914	PCED1B	0.445648	0.0675773	4.26275e-11	3
	ENSG00000109320	4	103480472	NFKB1	ENSG00000103642	15	63424129	LACTB	0.381868	0.0597178	1.6103e-10	3
	ENSG00000109320	4	103480472	NFKB1	ENSG00000005513	16	1034393	SOX8	0.440641	0.0616584	8.90303e-13	3
	ENSG00000109320	4	103480472	NFKB1	ENSG00000162078	16	2884568	ZG16B	0.759215	0.07355	5.57908e-25	3
	ENSG00000109320	4	103480472	NFKB1	ENSG00000140968	16	85944312	IRF8	-0.498523	0.0631862	3.02811e-15	3
	ENSG00000109320	4	103480472	NFKB1	ENSG00000173917	17	46620848	HOXB2	0.349135	0.0595692	4.60088e-09	3
	ENSG00000109320	4	103480472	NFKB1	ENSG00000154229	17	64552807	PRKCA	0.452293	0.0633447	9.32016e-13	3
	ENSG00000109320	4	103480472	NFKB1	ENSG00000011422	19	44162473	PLAUR	0.375841	0.0598606	3.41619e-10	3
	ENSG00000109320	4	103480472	NFKB1	ENSG00000124102	20	43804351	PI3	0.531236	0.0619108	9.43268e-18	3
	ENSG00000109320	4	103480472	NFKB1	ENSG00000182463	20	51848214	TSHZ2	0.340469	0.0619383	3.86522e-08	3
	ENSG00000109320	4	103480472	NFKB1	ENSG00000169891	4	17068104	REPS2	0.654317	0.11232	5.69468e-09	3
	ENSG00000145354	4	103800267	CISD2	ENSG00000135925	2	219754694	WNT10A	0.340388	0.054559	4.4064e-10	3
	ENSG00000145354	4	103800267	CISD2	ENSG00000157017	3	10330995	GHRL	-0.443077	0.0795429	2.54325e-08	3
	ENSG00000145354	4	103800267	CISD2	ENSG00000120318	5	141047378	ARAP3	-0.350334	0.0549176	1.77923e-10	3
	ENSG00000145354	4	103800267	CISD2	ENSG00000112394	6	111476502	SLC16A10	-0.356116	0.0573314	5.24704e-10	3
	ENSG00000145354	4	103800267	CISD2	ENSG00000156395	10	106712926	ENSG00000156395	-0.310521	0.0551879	1.83787e-08	3
	ENSG00000145354	4	103800267	CISD2	ENSG00000111796	12	9753814	KLRB1	0.317762	0.0536136	3.08743e-09	3
	ENSG00000145354	4	103800267	CISD2	ENSG00000090920	19	40397248	FCGBP	0.327429	0.0565847	7.18577e-09	3
	ENSG00000197208	5	131655017	SLC22A4	ENSG00000115415	2	191857385	STAT1	-0.132496	0.0199894	3.39602e-11	5
	ENSG00000197208	5	131655017	SLC22A4	ENSG00000099194	10	102115736	SCD	0.181723	0.0201113	1.62722e-19	5
	ENSG00000197208	5	131655017	SLC22A4	ENSG00000103355	16	2835951	PRSS33	0.112769	0.0200195	1.77158e-08	4
	ENSG00000197375	5	131718375	SLC22A5	ENSG00000115415	2	191857385	STAT1	-0.0799755	0.0113897	2.19113e-12	3
	ENSG00000197375	5	131718375	SLC22A5	ENSG00000099194	10	102115736	SCD	0.102818	0.0113847	1.69787e-19	3
	ENSG00000170271	5	154218431	FAXDC2	ENSG00000223609	11	5255254	HBD	-0.156439	0.020593	3.03809e-14	8
	ENSG00000170271	5	154218431	FAXDC2	ENSG00000206177	16	210329	HBM	-0.207598	0.0230117	1.85691e-19	6
	ENSG00000170271	5	154218431	FAXDC2	ENSG00000090013	19	40962721	BLVRB	-0.168396	0.0233466	5.47721e-13	5
	ENSG00000161011	5	179249233	SQSTM1	ENSG00000000938	1	27950181	FGR	0.470642	0.042917	5.54765e-28	5
	ENSG00000161011	5	179249233	SQSTM1	ENSG00000131669	9	95890170	NINJ1	0.216026	0.0334874	1.11136e-10	7
	ENSG00000161011	5	179249233	SQSTM1	ENSG00000108179	10	81111159	PPIF	0.20355	0.0349802	5.91964e-09	6
	ENSG00000161011	5	179249233	SQSTM1	ENSG00000139370	12	129293133	SLC15A4	0.288638	0.0388253	1.05137e-13	5
	ENSG00000161011	5	179249233	SQSTM1	ENSG00000124102	20	43804351	PI3	0.617226	0.0471588	3.84347e-39	4
	ENSG00000161011	5	179249233	SQSTM1	ENSG00000124107	20	43882042	SLPI	0.197145	0.0348415	1.52858e-08	6
	ENSG00000168405	6	25149996	CMAHP	ENSG00000253570	8	38458448	RNF5P1	0.726345	0.104422	3.50398e-12	3
	ENSG00000079691	6	25450032	LRRC16A	ENSG00000253570	8	38458448	RNF5P1	-1.24322	0.200221	5.32417e-10	3
	ENSG00000124564	6	25857904	ENSG00000124564	ENSG00000228653	7	63961655	HNRNPCP7	0.636939	0.116193	4.2118e-08	3
	ENSG00000158373	6	26164963	HIST1H2BD	ENSG00000105507	19	48540260	CABP5	0.15148	0.0219449	5.10187e-12	10
	ENSG00000168274	6	26217438	HIST1H2AE	ENSG00000136842	9	100313742	TMOD1	0.24855	0.0281481	1.04622e-18	18
	ENSG00000186470	6	26371966	BTN3A2	ENSG00000226660	7	142001001	TRBV2	-0.158304	0.0273334	6.97256e-09	6
	ENSG00000186470	6	26371966	BTN3A2	ENSG00000211734	7	142020929	TRBV5-1	-0.193813	0.0273041	1.26288e-12	6
	ENSG00000186470	6	26371966	BTN3A2	ENSG00000253570	8	38458448	RNF5P1	-0.490844	0.0270457	1.31523e-73	6
	ENSG00000186470	6	26371966	BTN3A2	ENSG00000184281	11	2423412	TSSC4	-0.0760127	0.0123839	8.35582e-10	6
	ENSG00000186470	6	26371966	BTN3A2	ENSG00000211785	14	22309689	TRAV12-1	-0.182602	0.0273861	2.59906e-11	6
	ENSG00000186470	6	26371966	BTN3A2	ENSG00000211801	14	22521044	TRAV21	-0.0781555	0.0141121	3.05609e-08	6
	ENSG00000186470	6	26371966	BTN3A2	ENSG00000211810	14	22631450	TRAV29DV5	-0.155059	0.0273605	1.45103e-08	6
	ENSG00000186470	6	26371966	BTN3A2	ENSG00000211816	14	22740148	TRAV38-1	0.15377	0.0273385	1.85869e-08	6
	ENSG00000186470	6	26371966	BTN3A2	ENSG00000196419	22	42038583	XRCC6	0.0865235	0.0137808	3.41712e-10	6
	ENSG00000124508	6	26389213	BTN2A2	ENSG00000211789	14	22356359	TRAV12-2	0.596562	0.103799	9.06785e-09	3
	ENSG00000197903	6	27110346	HIST1H2BK	ENSG00000253570	8	38458448	RNF5P1	0.362793	0.0629146	8.09601e-09	12
	ENSG00000197062	6	28240381	RP5-874C20.3	ENSG00000211785	14	22309689	TRAV12-1	-0.506877	0.0927758	4.6693e-08	3
	ENSG00000197062	6	28240381	RP5-874C20.3	ENSG00000211797	14	22466092	TRAV17	0.530125	0.0744084	1.0444e-12	3
	ENSG00000197062	6	28240381	RP5-874C20.3	ENSG00000211810	14	22631450	TRAV29DV5	-0.560987	0.0931142	1.69402e-09	3
	ENSG00000124496	6	42306229	TRERF1	ENSG00000122694	9	36150321	GLIPR2	0.366662	0.0401287	6.41231e-20	3
	ENSG00000124496	6	42306229	TRERF1	ENSG00000140526	15	89688140	ABHD2	0.22133	0.0387117	1.08166e-08	3
	ENSG00000112182	6	90821437	BACH2	ENSG00000198520	1	45165813	C1orf228	0.29868	0.0488878	9.99366e-10	3
	ENSG00000112182	6	90821437	BACH2	ENSG00000114948	2	207397057	ADAM23	0.300352	0.0507635	3.28474e-09	3
	ENSG00000112182	6	90821437	BACH2	ENSG00000010327	3	52543932	STAB1	-0.273867	0.0496792	3.5335e-08	3
	ENSG00000112182	6	90821437	BACH2	ENSG00000173114	7	110748286	LRRN3	-0.431566	0.0490797	1.45411e-18	3
	ENSG00000112182	6	90821437	BACH2	ENSG00000227051	14	96533039	C14orf132	0.568126	0.0524508	2.43845e-27	3
	ENSG00000112182	6	90821437	BACH2	ENSG00000168646	17	63541223	AXIN2	0.460538	0.049429	1.195e-20	3
	ENSG00000112182	6	90821437	BACH2	ENSG00000168234	18	21644155	TTC39C	-0.27884	0.0485206	9.09285e-09	3
	ENSG00000080546	6	109361831	SESN1	ENSG00000184613	12	45108844	NELL2	-0.118515	0.0204806	7.1793e-09	4
	ENSG00000080546	6	109361831	SESN1	ENSG00000129270	17	34102989	MMP28	-0.143824	0.0235517	1.01684e-09	4
	ENSG00000080546	6	109361831	SESN1	ENSG00000263417	18	68307867	GTSCR1	-0.141139	0.0234224	1.68255e-09	3
	ENSG00000135535	6	109695739	CD164	ENSG00000180611	3	192575277	MB21D2	0.255906	0.0451831	1.48103e-08	3
	ENSG00000135535	6	109695739	CD164	ENSG00000133687	12	29795732	TMTC1	0.329123	0.0416757	2.85142e-15	3
	ENSG00000135535	6	109695739	CD164	ENSG00000134755	18	28664159	DSC2	0.37289	0.0422562	1.09947e-18	3
	ENSG00000135541	6	135711792	AHI1	ENSG00000182010	10	63985630	RTKN2	0.0855571	0.0105751	5.94416e-16	3
	ENSG00000135541	6	135711792	AHI1	ENSG00000255569	14	22090355	TRAV1-1	0.119067	0.0125481	2.33596e-21	3
	ENSG00000135541	6	135711792	AHI1	ENSG00000211777	14	22192264	TRAV3	0.12524	0.0123905	5.1062e-24	3
	ENSG00000135541	6	135711792	AHI1	ENSG00000211778	14	22204849	TRAV4	0.0859096	0.0124124	4.47555e-12	3
	ENSG00000135541	6	135711792	AHI1	ENSG00000211786	14	22315061	TRAV8-2	0.136801	0.02493	4.07908e-08	3
	ENSG00000135541	6	135711792	AHI1	ENSG00000211790	14	22362911	TRAV8-4	0.156967	0.0249172	2.98475e-10	3
	ENSG00000130363	6	159409265	RSPH3	ENSG00000133063	1	203212362	CHIT1	-0.45509	0.074992	1.29094e-09	3
	ENSG00000130363	6	159409265	RSPH3	ENSG00000012223	3	46501930	LTF	-0.415053	0.0664113	4.11124e-10	3
	ENSG00000130363	6	159409265	RSPH3	ENSG00000148346	9	130913542	LCN2	-0.765538	0.10211	6.52011e-14	3
	ENSG00000136240	7	6504728	KDELR2	ENSG00000185909	3	49211480	KLHDC8B	0.455421	0.0801652	1.33879e-08	3
	ENSG00000146592	7	28602225	CREB5	ENSG00000091106	2	32470222	NLRC4	0.304621	0.0485015	3.37147e-10	5
	ENSG00000146592	7	28602225	CREB5	ENSG00000135636	2	71797375	DYSF	0.371257	0.0588812	2.87855e-10	4
	ENSG00000146592	7	28602225	CREB5	ENSG00000115607	2	103052087	IL18RAP	0.255629	0.0460049	2.7514e-08	5
	ENSG00000146592	7	28602225	CREB5	ENSG00000182389	2	152822441	CACNB4	-0.364038	0.0619132	4.10748e-09	3
	ENSG00000146592	7	28602225	CREB5	ENSG00000137261	6	24595357	KIAA0319	0.309883	0.0474671	6.64906e-11	5
	ENSG00000146592	7	28602225	CREB5	ENSG00000096063	6	35844931	SRPK1	0.356241	0.048899	3.21123e-13	5
	ENSG00000146592	7	28602225	CREB5	ENSG00000100504	14	51368031	PYGL	0.296422	0.0472892	3.65037e-10	5
	ENSG00000146592	7	28602225	CREB5	ENSG00000100605	14	93492962	ITPK1	-0.276701	0.0457324	1.44453e-09	5
	ENSG00000146592	7	28602225	CREB5	ENSG00000069943	15	55629502	PIGB	-0.30024	0.050811	3.44289e-09	4
	ENSG00000146592	7	28602225	CREB5	ENSG00000136371	15	80157824	MTHFS	-0.290331	0.050742	1.05458e-08	4
	ENSG00000146592	7	28602225	CREB5	ENSG00000103381	16	12827396	CPPED1	-0.312801	0.0487649	1.41314e-10	4
	ENSG00000146592	7	28602225	CREB5	ENSG00000077238	16	27350544	IL4R	0.292351	0.0465641	3.41922e-10	5
	ENSG00000146592	7	28602225	CREB5	ENSG00000077984	20	24935215	CST7	0.27653	0.0466113	2.98044e-09	5
	ENSG00000146592	7	28602225	CREB5	ENSG00000159496	22	24035843	RGL4	0.383602	0.0466407	1.95806e-16	5
	ENSG00000136286	7	45010479	MYO1G	ENSG00000248527	1	569416	MTATP6P1	1.24906	0.187257	2.55287e-11	3
	ENSG00000185811	7	50408259	IKZF1	ENSG00000133055	1	203140940	MYBPH	-0.272439	0.0377509	5.32468e-13	3
	ENSG00000185811	7	50408259	IKZF1	ENSG00000172037	3	49164549	LAMB2	-0.422315	0.041667	3.84501e-24	4
	ENSG00000185811	7	50408259	IKZF1	ENSG00000196549	3	154821705	MME	-0.218163	0.0368219	3.12656e-09	3
	ENSG00000185811	7	50408259	IKZF1	ENSG00000163625	4	85739124	WDFY3	-0.228025	0.0393688	6.95477e-09	3
	ENSG00000185811	7	50408259	IKZF1	ENSG00000138646	4	89402791	HERC5	0.225964	0.0360077	3.48641e-10	4
	ENSG00000185811	7	50408259	IKZF1	ENSG00000185033	15	90738373	SEMA4B	-0.229579	0.0394613	5.96161e-09	3
	ENSG00000185811	7	50408259	IKZF1	ENSG00000134755	18	28664159	DSC2	-0.347933	0.0381083	6.84404e-20	3
	ENSG00000185811	7	50408259	IKZF1	ENSG00000183019	19	7743113	C19orf59	-0.292034	0.0408113	8.32317e-13	4
	ENSG00000185811	7	50408259	IKZF1	ENSG00000089351	19	35501531	GRAMD1A	-0.264449	0.0365983	4.98448e-13	4
	ENSG00000132436	7	50514959	FIGNL1	ENSG00000162599	1	61629698	NFIA	0.184436	0.0261966	1.91627e-12	3
	ENSG00000132436	7	50514959	FIGNL1	ENSG00000179914	1	160850644	ITLN1	-0.354467	0.0387879	6.32608e-20	3
	ENSG00000132436	7	50514959	FIGNL1	ENSG00000162873	1	205315693	KLHDC8A	0.162687	0.0260472	4.21545e-10	3
	ENSG00000132436	7	50514959	FIGNL1	ENSG00000135924	2	220147805	DNAJB2	0.157116	0.0256888	9.58743e-10	3
	ENSG00000132436	7	50514959	FIGNL1	ENSG00000178694	3	93814574	NSUN3	-0.222512	0.0259287	9.34798e-18	3
	ENSG00000132436	7	50514959	FIGNL1	ENSG00000145423	4	154706008	SFRP2	-0.140837	0.0258062	4.82971e-08	3
	ENSG00000132436	7	50514959	FIGNL1	ENSG00000196923	5	176917501	PDLIM7	-0.181933	0.0280411	8.69478e-11	3
	ENSG00000132436	7	50514959	FIGNL1	ENSG00000106263	7	2407050	EIF3B	0.208513	0.0256891	4.78648e-16	3
	ENSG00000132436	7	50514959	FIGNL1	ENSG00000153814	7	28045277	JAZF1	0.221926	0.025673	5.41183e-18	3
	ENSG00000132436	7	50514959	FIGNL1	ENSG00000186591	7	129531680	UBE2H	0.155333	0.0256939	1.48918e-09	3
	ENSG00000132436	7	50514959	FIGNL1	ENSG00000133606	7	140166104	MKRN1	0.276597	0.038169	4.27216e-13	3
	ENSG00000132436	7	50514959	FIGNL1	ENSG00000055118	7	150658726	KCNH2	0.232144	0.0256929	1.63458e-19	3
	ENSG00000132436	7	50514959	FIGNL1	ENSG00000179632	8	145160958	MAF1	0.207285	0.0260134	1.60719e-15	3
	ENSG00000132436	7	50514959	FIGNL1	ENSG00000165283	9	35101521	STOML2	0.207762	0.0256792	5.93363e-16	3
	ENSG00000132436	7	50514959	FIGNL1	ENSG00000233820	9	99488961	RP11-535M15.2	0.206448	0.0356465	6.97488e-09	3
	ENSG00000132436	7	50514959	FIGNL1	ENSG00000136842	9	100313742	TMOD1	0.198608	0.0257186	1.14228e-14	3
	ENSG00000132436	7	50514959	FIGNL1	ENSG00000136908	9	130699070	DPM2	0.170485	0.0257488	3.56602e-11	3
	ENSG00000132436	7	50514959	FIGNL1	ENSG00000148341	9	131779948	SH3GLB2	0.208594	0.0258234	6.60036e-16	3
	ENSG00000132436	7	50514959	FIGNL1	ENSG00000156515	10	71095689	HK1	0.165695	0.0260943	2.15523e-10	3
	ENSG00000132436	7	50514959	FIGNL1	ENSG00000177666	11	822237	PNPLA2	0.176824	0.025712	6.10896e-12	3
	ENSG00000132436	7	50514959	FIGNL1	ENSG00000167994	11	61676257	RAB3IL1	0.145944	0.0258011	1.545e-08	3
	ENSG00000132436	7	50514959	FIGNL1	ENSG00000111678	12	7053653	C12orf57	-0.14237	0.0257314	3.1491e-08	3
	ENSG00000132436	7	50514959	FIGNL1	ENSG00000060138	12	10863797	YBX3	-0.162783	0.0282441	8.24231e-09	3
	ENSG00000132436	7	50514959	FIGNL1	ENSG00000119681	14	75022089	LTBP2	0.16834	0.0281676	2.28188e-09	3
	ENSG00000132436	7	50514959	FIGNL1	ENSG00000067836	16	4849960	ROGDI	-0.17842	0.0256811	3.71771e-12	3
	ENSG00000132436	7	50514959	FIGNL1	ENSG00000103342	16	11985962	GSPT1	0.228247	0.0256657	5.9444e-19	3
	ENSG00000132436	7	50514959	FIGNL1	ENSG00000166783	16	15712633	KIAA0430	0.146649	0.0257312	1.2033e-08	3
	ENSG00000132436	7	50514959	FIGNL1	ENSG00000090238	16	30105935	YPEL3	0.158563	0.0271786	5.40787e-09	3
	ENSG00000132436	7	50514959	FIGNL1	ENSG00000205250	16	67229446	E2F4	0.144292	0.0257126	2.0035e-08	3
	ENSG00000132436	7	50514959	FIGNL1	ENSG00000204815	17	40102268	TTC25	-0.161557	0.0258031	3.82152e-10	3
	ENSG00000132436	7	50514959	FIGNL1	ENSG00000198336	17	45289428	MYL4	-0.313092	0.0256527	2.9219e-34	3
	ENSG00000132436	7	50514959	FIGNL1	ENSG00000129355	19	10678436	CDKN2D	0.155986	0.0256895	1.26342e-09	3
	ENSG00000132436	7	50514959	FIGNL1	ENSG00000130159	19	11628360	ECSIT	0.147836	0.0257788	9.76375e-09	3
	ENSG00000132436	7	50514959	FIGNL1	ENSG00000105610	19	12996616	KLF1	0.205691	0.025792	1.52369e-15	3
	ENSG00000132436	7	50514959	FIGNL1	ENSG00000179262	19	13060562	RAD23A	0.172997	0.0257289	1.76986e-11	3
	ENSG00000132436	7	50514959	FIGNL1	ENSG00000090013	19	40962721	BLVRB	-0.158679	0.025748	7.14785e-10	3
	ENSG00000132436	7	50514959	FIGNL1	ENSG00000105402	19	48004695	NAPA	0.151906	0.0260972	5.85682e-09	3
	ENSG00000132436	7	50514959	FIGNL1	ENSG00000100104	22	26883871	SRRD	0.153752	0.0256975	2.18859e-09	3
	ENSG00000132436	7	50514959	FIGNL1	ENSG00000186998	22	29628713	EMID1	-0.177289	0.0257264	5.5271e-12	3
	ENSG00000132436	7	50514959	FIGNL1	ENSG00000100116	22	38208547	GCAT	-0.171075	0.0257892	3.27575e-11	3
	ENSG00000132436	7	50514959	FIGNL1	ENSG00000186654	22	45099077	PRR5	0.157227	0.0259019	1.27823e-09	3
	ENSG00000132436	7	50514959	FIGNL1	ENSG00000047597	7	37568197	XK	0.294713	0.0475376	5.66186e-10	3
	ENSG00000181220	7	149182396	ZNF746	ENSG00000163703	3	9981301	CRELD1	-0.177489	0.0322197	3.61477e-08	6
	ENSG00000181220	7	149182396	ZNF746	ENSG00000136193	7	29994812	SCRN1	-0.183676	0.0322207	1.19418e-08	6
	ENSG00000181220	7	149182396	ZNF746	ENSG00000178789	17	72522463	CD300LB	0.235001	0.0354991	3.59396e-11	4
	ENSG00000181220	7	149182396	ZNF746	ENSG00000196218	19	39001271	RYR1	-0.195357	0.0326297	2.13611e-09	6
	ENSG00000175806	8	10099089	MSRA	ENSG00000081181	14	68102476	ARG2	-0.180112	0.0290211	5.42599e-10	5
	ENSG00000167034	8	23538323	NKX3-1	ENSG00000171049	19	52264529	FPR2	-0.119064	0.0175781	1.2574e-11	3
	ENSG00000171033	8	79472938	PKIA	ENSG00000171791	18	60888970	BCL2	-0.126503	0.0224056	1.64178e-08	3
	ENSG00000022567	8	142267834	SLC45A4	ENSG00000244617	2	70188311	ASPRV1	-0.137939	0.017729	7.22756e-15	5
	ENSG00000022567	8	142267834	SLC45A4	ENSG00000154928	3	134647976	EPHB1	0.109483	0.0159057	5.85111e-12	5
	ENSG00000022567	8	142267834	SLC45A4	ENSG00000123505	6	111206444	AMD1	0.273536	0.0487246	1.97798e-08	5
	ENSG00000022567	8	142267834	SLC45A4	ENSG00000134152	15	34467586	KATNBL1	0.115625	0.0183728	3.10859e-10	5
	ENSG00000022567	8	142267834	SLC45A4	ENSG00000159720	16	67493528	ATP6V0D1	0.110824	0.0159991	4.30046e-12	5
	ENSG00000022567	8	142267834	SLC45A4	ENSG00000033627	17	40642745	ATP6V0A1	0.0927616	0.0158443	4.7827e-09	5
	ENSG00000022567	8	142267834	SLC45A4	ENSG00000131467	17	40986088	PSME3	-0.0922778	0.0161147	1.02634e-08	4
	ENSG00000184489	8	142421856	PTP4A3	ENSG00000170448	4	47882955	NFXL1	0.479767	0.0856926	2.15961e-08	4
	ENSG00000178685	8	145069130	PARP10	ENSG00000115523	2	85919137	GNLY	-0.268499	0.0413433	8.33737e-11	3
	ENSG00000165006	9	34215762	UBAP1	ENSG00000164683	8	80678171	HEY1	0.498658	0.0736654	1.29467e-11	5
	ENSG00000136932	9	100675811	C9orf156	ENSG00000151789	3	21937363	ZNF385D	0.140489	0.0231593	1.30961e-09	3
	ENSG00000136932	9	100675811	C9orf156	ENSG00000154917	3	133578881	RAB6B	-0.137798	0.0232761	3.21645e-09	3
	ENSG00000136932	9	100675811	C9orf156	ENSG00000180354	7	30188402	C7orf41	0.172427	0.0250975	6.40705e-12	3
	ENSG00000136932	9	100675811	C9orf156	ENSG00000111644	12	6751933	ACRBP	0.138897	0.0229478	1.42385e-09	3
	ENSG00000198121	9	113718262	LPAR1	ENSG00000014914	1	149904667	MTMR11	0.090142	0.0116682	1.11453e-14	7
	ENSG00000198121	9	113718262	LPAR1	ENSG00000138829	5	127794239	FBN2	0.077837	0.0115817	1.80896e-11	8
	ENSG00000198121	9	113718262	LPAR1	ENSG00000205269	6	11560847	TMEM170B	0.0840497	0.0142122	3.34036e-09	8
	ENSG00000198121	9	113718262	LPAR1	ENSG00000197746	10	73593590	PSAP	0.0699353	0.0116337	1.83906e-09	8
	ENSG00000198121	9	113718262	LPAR1	ENSG00000110077	11	59945610	MS4A6A	0.0743446	0.0117724	2.69894e-10	7
	ENSG00000198121	9	113718262	LPAR1	ENSG00000155465	14	23270730	SLC7A7	0.0810991	0.01168	3.8277e-12	6
	ENSG00000198121	9	113718262	LPAR1	ENSG00000100097	22	38073714	LGALS1	0.0681475	0.011576	3.93393e-09	8
	ENSG00000148346	9	130913542	LCN2	ENSG00000184292	1	59042132	TACSTD2	0.283918	0.0335877	2.83845e-17	5
	ENSG00000148346	9	130913542	LCN2	ENSG00000133063	1	203212362	CHIT1	0.34992	0.0319694	6.9844e-28	6
	ENSG00000148346	9	130913542	LCN2	ENSG00000163710	3	142571404	PCOLCE2	0.261257	0.0341304	1.93788e-14	5
	ENSG00000148346	9	130913542	LCN2	ENSG00000239839	8	6874607	DEFA3	0.623312	0.0713529	2.42338e-18	6
	ENSG00000148346	9	130913542	LCN2	ENSG00000254006	8	65721961	RP11-1D12.2	0.490558	0.0727653	1.56613e-11	5
	ENSG00000148346	9	130913542	LCN2	ENSG00000134827	11	59627160	TCN1	0.537112	0.0443535	9.3721e-34	6
	ENSG00000148346	9	130913542	LCN2	ENSG00000149516	11	59831330	MS4A3	0.38839	0.0400082	2.79431e-22	5
	ENSG00000148346	9	130913542	LCN2	ENSG00000100448	14	25044097	CTSG	0.419883	0.0414084	3.66917e-24	4
	ENSG00000148346	9	130913542	LCN2	ENSG00000268833	19	42276303	AC011513.4	0.394069	0.0669593	3.97556e-09	6
	ENSG00000148346	9	130913542	LCN2	ENSG00000185275	9	21154474	CD24P4	0.400952	0.0674245	2.7363e-09	6
	ENSG00000148288	9	136033836	GBGT1	ENSG00000185630	1	164696677	PBX1	0.412666	0.0538234	1.76013e-14	7
	ENSG00000172661	10	46255528	FAM21C	ENSG00000115758	2	10584362	ODC1	-0.153806	0.0240216	1.52536e-10	3
	ENSG00000172661	10	46255528	FAM21C	ENSG00000132819	20	55975426	RBM38	-0.163877	0.0245734	2.57739e-11	3
	ENSG00000172661	10	46255528	FAM21C	ENSG00000158578	10	55046492	ALAS2	0.342506	0.048091	1.06331e-12	3
	ENSG00000108175	10	80952534	ZMIZ1	ENSG00000206561	3	15527449	COLQ	-0.316737	0.0528642	2.07896e-09	4
	ENSG00000152804	10	94451674	HHEX	ENSG00000115828	2	37586091	QPCT	-0.220869	0.0366121	1.61277e-09	3
	ENSG00000152804	10	94451674	HHEX	ENSG00000166527	12	8668516	CLEC4D	-0.259397	0.0369274	2.14819e-12	3
	ENSG00000152804	10	94451674	HHEX	ENSG00000169896	16	31307762	ITGAM	-0.244961	0.036856	3.00276e-11	3
	ENSG00000213390	10	99015704	ARHGAP19	ENSG00000134243	1	109896382	SORT1	-0.163174	0.0235922	4.63184e-12	3
	ENSG00000213390	10	99015704	ARHGAP19	ENSG00000138061	2	38315580	CYP1B1	0.179359	0.0236772	3.58624e-14	3
	ENSG00000213390	10	99015704	ARHGAP19	ENSG00000184489	8	142421856	PTP4A3	-0.13198	0.0235279	2.02894e-08	3
	ENSG00000213390	10	99015704	ARHGAP19	ENSG00000165092	9	75605468	ALDH1A1	0.164601	0.0236172	3.17983e-12	3
	ENSG00000213390	10	99015704	ARHGAP19	ENSG00000198121	9	113718262	LPAR1	0.174698	0.0236424	1.47745e-13	3
	ENSG00000213390	10	99015704	ARHGAP19	ENSG00000130529	19	49688045	TRPM4	0.16765	0.0236443	1.3363e-12	3
	ENSG00000213390	10	99015704	ARHGAP19	ENSG00000125810	20	23063481	CD93	0.13703	0.0235931	6.32099e-09	3
	ENSG00000165879	10	99080347	FRAT1	ENSG00000134243	1	109896382	SORT1	-0.177006	0.0264994	2.39569e-11	4
	ENSG00000165879	10	99080347	FRAT1	ENSG00000138061	2	38315580	CYP1B1	0.1861	0.02591	6.84332e-13	5
	ENSG00000165879	10	99080347	FRAT1	ENSG00000169429	4	74607828	IL8	-0.197777	0.0294064	1.748e-11	4
	ENSG00000165879	10	99080347	FRAT1	ENSG00000165092	9	75605468	ALDH1A1	0.164186	0.0258471	2.12267e-10	5
	ENSG00000165879	10	99080347	FRAT1	ENSG00000198121	9	113718262	LPAR1	0.159029	0.0256923	6.02579e-10	4
	ENSG00000165879	10	99080347	FRAT1	ENSG00000130529	19	49688045	TRPM4	0.163796	0.0257266	1.9302e-10	4
	ENSG00000181274	10	99093356	FRAT2	ENSG00000134243	1	109896382	SORT1	-0.11187	0.0156108	7.71052e-13	4
	ENSG00000181274	10	99093356	FRAT2	ENSG00000138061	2	38315580	CYP1B1	0.120684	0.0155567	8.65009e-15	4
	ENSG00000181274	10	99093356	FRAT2	ENSG00000024862	6	139104556	CCDC28A	-0.145288	0.0174583	8.64756e-17	5
	ENSG00000181274	10	99093356	FRAT2	ENSG00000105856	7	106826190	HBP1	-0.107638	0.0174546	6.9722e-10	5
	ENSG00000181274	10	99093356	FRAT2	ENSG00000013374	7	151057160	NUB1	-0.118249	0.0175021	1.41561e-11	5
	ENSG00000181274	10	99093356	FRAT2	ENSG00000165092	9	75605468	ALDH1A1	0.112288	0.0155965	6.03875e-13	4
	ENSG00000181274	10	99093356	FRAT2	ENSG00000198121	9	113718262	LPAR1	0.117148	0.015466	3.60389e-14	5
	ENSG00000181274	10	99093356	FRAT2	ENSG00000150593	10	112645664	PDCD4	-0.110071	0.0176245	4.22834e-10	5
	ENSG00000181274	10	99093356	FRAT2	ENSG00000139946	14	56676388	PELI2	-0.130476	0.0175616	1.08933e-13	4
	ENSG00000181274	10	99093356	FRAT2	ENSG00000185262	17	74264329	UBALD2	-0.138807	0.0193024	6.42348e-13	5
	ENSG00000181274	10	99093356	FRAT2	ENSG00000130529	19	49688045	TRPM4	0.10749	0.0155176	4.2997e-12	5
	ENSG00000052749	10	99138621	RRP12	ENSG00000134243	1	109896382	SORT1	-0.0700717	0.0101953	6.28802e-12	6
	ENSG00000052749	10	99138621	RRP12	ENSG00000169429	4	74607828	IL8	-0.0789378	0.0113661	3.78469e-12	4
	ENSG00000052749	10	99138621	RRP12	ENSG00000024862	6	139104556	CCDC28A	-0.0979199	0.0115461	2.2371e-17	5
	ENSG00000052749	10	99138621	RRP12	ENSG00000105856	7	106826190	HBP1	-0.0710208	0.0115305	7.30362e-10	7
	ENSG00000052749	10	99138621	RRP12	ENSG00000013374	7	151057160	NUB1	-0.0773764	0.0115538	2.12703e-11	6
	ENSG00000052749	10	99138621	RRP12	ENSG00000198121	9	113718262	LPAR1	0.0709199	0.0101332	2.58184e-12	7
	ENSG00000052749	10	99138621	RRP12	ENSG00000150593	10	112645664	PDCD4	-0.0699599	0.0114982	1.16915e-09	7
	ENSG00000052749	10	99138621	RRP12	ENSG00000139946	14	56676388	PELI2	-0.0785493	0.011421	6.0854e-12	7
	ENSG00000052749	10	99138621	RRP12	ENSG00000185262	17	74264329	UBALD2	-0.0876617	0.012696	5.03246e-12	7
	ENSG00000052749	10	99138621	RRP12	ENSG00000130529	19	49688045	TRPM4	0.06344	0.0101406	3.94903e-10	6
	ENSG00000052749	10	99138621	RRP12	ENSG00000125810	20	23063481	CD93	0.0566704	0.0102528	3.25213e-08	6
	ENSG00000166275	10	104623485	C10orf32	ENSG00000134668	1	32268837	SPOCD1	-0.209014	0.0314355	2.95169e-11	5
	ENSG00000188076	11	193826	SCGB1C1	ENSG00000223972	1	13140	DDX11L1	0.367594	0.0445818	1.64633e-16	3
	ENSG00000188076	11	193826	SCGB1C1	ENSG00000117155	1	85132938	SSX2IP	0.105953	0.0194012	4.73053e-08	3
	ENSG00000188076	11	193826	SCGB1C1	ENSG00000197959	1	172099113	DNM3	0.177765	0.0199831	5.80219e-19	3
	ENSG00000188076	11	193826	SCGB1C1	ENSG00000117592	1	173452175	PRDX6	0.129252	0.019268	1.97185e-11	3
	ENSG00000188076	11	193826	SCGB1C1	ENSG00000117691	1	212612971	NENF	0.10685	0.0194814	4.14113e-08	3
	ENSG00000188076	11	193826	SCGB1C1	ENSG00000143811	1	226109778	PYCR2	0.117672	0.0191444	7.92006e-10	3
	ENSG00000188076	11	193826	SCGB1C1	ENSG00000119280	1	230989100	C1orf198	0.158537	0.0197676	1.05695e-15	3
	ENSG00000188076	11	193826	SCGB1C1	ENSG00000013016	2	31474596	EHD3	0.129747	0.019589	3.50875e-11	3
	ENSG00000188076	11	193826	SCGB1C1	ENSG00000049323	2	33398307	LTBP1	0.114117	0.0194403	4.35522e-09	3
	ENSG00000188076	11	193826	SCGB1C1	ENSG00000119862	2	64684809	LGALSL	0.182817	0.0195497	8.65179e-21	3
	ENSG00000188076	11	193826	SCGB1C1	ENSG00000169756	2	109227279	LIMS1	0.167143	0.0199468	5.31617e-17	3
	ENSG00000188076	11	193826	SCGB1C1	ENSG00000061676	2	183846595	NCKAP1	0.114272	0.0195499	5.06138e-09	3
	ENSG00000188076	11	193826	SCGB1C1	ENSG00000163359	2	238277832	COL6A3	0.11251	0.0191372	4.12407e-09	3
	ENSG00000188076	11	193826	SCGB1C1	ENSG00000154917	3	133578881	RAB6B	0.126844	0.0198254	1.57362e-10	3
	ENSG00000188076	11	193826	SCGB1C1	ENSG00000152952	3	145834333	PLOD2	0.140543	0.0196724	9.05268e-13	3
	ENSG00000188076	11	193826	SCGB1C1	ENSG00000163737	4	74847317	PF4	0.181353	0.0199478	9.78237e-20	3
	ENSG00000188076	11	193826	SCGB1C1	ENSG00000164116	4	156620682	GUCY1A3	0.194286	0.0202289	7.66257e-22	3
	ENSG00000188076	11	193826	SCGB1C1	ENSG00000170271	5	154218431	FAXDC2	0.109745	0.0192781	1.25024e-08	3
	ENSG00000188076	11	193826	SCGB1C1	ENSG00000005249	7	106743675	PRKAR2B	0.114913	0.0194821	3.6706e-09	3
	ENSG00000188076	11	193826	SCGB1C1	ENSG00000205038	8	110458632	PKHD1L1	0.109014	0.0194046	1.93236e-08	3
	ENSG00000188076	11	193826	SCGB1C1	ENSG00000147862	9	14240412	NFIB	0.169119	0.0198169	1.41265e-17	3
	ENSG00000188076	11	193826	SCGB1C1	ENSG00000137076	9	35714668	TLN1	0.108707	0.0191062	1.27329e-08	3
	ENSG00000188076	11	193826	SCGB1C1	ENSG00000172159	9	86005683	FRMD3	-0.144447	0.0192277	5.80252e-14	3
	ENSG00000188076	11	193826	SCGB1C1	ENSG00000148426	10	11889807	PROSER2	0.121566	0.0198794	9.64556e-10	3
	ENSG00000188076	11	193826	SCGB1C1	ENSG00000099256	10	25189534	PRTFDC1	0.114743	0.0191245	1.97573e-09	3
	ENSG00000188076	11	193826	SCGB1C1	ENSG00000107438	10	97024055	PDLIM1	0.178216	0.0191448	1.29224e-20	3
	ENSG00000188076	11	193826	SCGB1C1	ENSG00000166333	11	6628531	ILK	0.181785	0.0191936	2.7676e-21	3
	ENSG00000188076	11	193826	SCGB1C1	ENSG00000149781	11	63982752	FERMT3	0.158589	0.0192836	1.9674e-16	3
	ENSG00000188076	11	193826	SCGB1C1	ENSG00000149218	11	94844391	ENDOD1	0.182822	0.0197409	2.02376e-20	3
	ENSG00000188076	11	193826	SCGB1C1	ENSG00000167553	12	49624816	TUBA1C	0.19851	0.0215049	2.68266e-20	3
	ENSG00000188076	11	193826	SCGB1C1	ENSG00000125257	13	95812885	ABCC4	0.120151	0.0193667	5.50423e-10	3
	ENSG00000188076	11	193826	SCGB1C1	ENSG00000072042	14	68153024	RDH11	0.117088	0.0194866	1.87068e-09	3
	ENSG00000188076	11	193826	SCGB1C1	ENSG00000156381	14	102974657	ANKRD9	0.115362	0.0191894	1.83504e-09	3
	ENSG00000188076	11	193826	SCGB1C1	ENSG00000137801	15	39882473	THBS1	0.197771	0.0195807	5.50733e-24	3
	ENSG00000188076	11	193826	SCGB1C1	ENSG00000140479	15	101953111	PCSK6	0.138903	0.0197133	1.83925e-12	3
	ENSG00000188076	11	193826	SCGB1C1	ENSG00000248472	15	102518028	DDX11L9	0.337768	0.0437781	1.20555e-14	3
	ENSG00000188076	11	193826	SCGB1C1	ENSG00000087237	16	57006759	CETP	0.157111	0.0196385	1.24246e-15	3
	ENSG00000188076	11	193826	SCGB1C1	ENSG00000140859	16	57844543	KIFC3	0.139964	0.0196501	1.05751e-12	3
	ENSG00000188076	11	193826	SCGB1C1	ENSG00000108576	17	28542178	SLC6A4	0.154392	0.0191595	7.74097e-16	3
	ENSG00000188076	11	193826	SCGB1C1	ENSG00000108387	17	56607895	SEPTIN4	0.17939	0.0199762	2.7028e-19	3
	ENSG00000188076	11	193826	SCGB1C1	ENSG00000141873	19	2736176	SLC39A3	0.115516	0.0197334	4.8039e-09	3
	ENSG00000188076	11	193826	SCGB1C1	ENSG00000129355	19	10678436	CDKN2D	0.116359	0.0190911	1.09483e-09	3
	ENSG00000188076	11	193826	SCGB1C1	ENSG00000167641	19	38744554	PPP1R14A	0.141196	0.0193839	3.23614e-13	3
	ENSG00000188076	11	193826	SCGB1C1	ENSG00000105507	19	48540260	CABP5	0.182543	0.0192008	1.96095e-21	3
	ENSG00000188076	11	193826	SCGB1C1	ENSG00000101335	20	35174057	MYL9	0.190504	0.0199726	1.45257e-21	3
	ENSG00000188076	11	193826	SCGB1C1	ENSG00000197122	20	36003770	SRC	0.160005	0.0197619	5.65129e-16	3
	ENSG00000188076	11	193826	SCGB1C1	ENSG00000101470	20	44457118	TNNC2	0.110428	0.019453	1.37341e-08	3
	ENSG00000188076	11	193826	SCGB1C1	ENSG00000064601	20	44523525	CTSA	0.11312	0.0192776	4.41265e-09	3
	ENSG00000188076	11	193826	SCGB1C1	ENSG00000240849	20	48733999	TMEM189	0.105944	0.0191961	3.40858e-08	3
	ENSG00000188076	11	193826	SCGB1C1	ENSG00000182093	21	40776312	WRB	0.13003	0.0194076	2.08465e-11	3
	ENSG00000188076	11	193826	SCGB1C1	ENSG00000128266	22	23439882	GNAZ	0.16033	0.0192996	9.78136e-17	3
	ENSG00000188076	11	193826	SCGB1C1	ENSG00000022267	11	135261538	FHL1	0.260177	0.0330923	3.77578e-15	3
	ENSG00000188076	11	193826	SCGB1C1	ENSG00000182484	11	155252671	WASH6P	0.29937	0.0415712	5.96067e-13	3
	ENSG00000188076	11	193826	SCGB1C1	ENSG00000069535	11	43683775	MAOB	0.189756	0.0326003	5.86082e-09	3
	ENSG00000188076	11	193826	SCGB1C1	ENSG00000198753	11	153037226	PLXNB3	0.181843	0.032598	2.42812e-08	3
	ENSG00000251661	11	322135	RP11-326C3.11	ENSG00000000938	1	27950181	FGR	-0.105461	0.0153996	7.47463e-12	3
	ENSG00000251661	11	322135	RP11-326C3.11	ENSG00000196182	1	36828361	STK40	-0.0852122	0.0154473	3.46199e-08	3
	ENSG00000251661	11	322135	RP11-326C3.11	ENSG00000117862	1	52503823	TXNDC12	-0.250342	0.0161827	5.55725e-54	3
	ENSG00000251661	11	322135	RP11-326C3.11	ENSG00000073756	1	186645241	PTGS2	-0.0850287	0.0154681	3.86205e-08	3
	ENSG00000251661	11	322135	RP11-326C3.11	ENSG00000100605	14	93492962	ITPK1	-0.100591	0.0154059	6.60472e-11	3
	ENSG00000251661	11	322135	RP11-326C3.11	ENSG00000167851	17	72471744	CD300A	-0.105924	0.0154295	6.64873e-12	3
	ENSG00000251661	11	322135	RP11-326C3.11	ENSG00000186074	17	72699784	CD300LF	-0.0993685	0.0155014	1.45254e-10	3
	ENSG00000177697	11	836337	CD151	ENSG00000163735	4	74862927	CXCL5	0.507232	0.0507114	1.48858e-23	7
	ENSG00000177697	11	836337	CD151	ENSG00000205038	8	110458632	PKHD1L1	0.602097	0.054294	1.40972e-28	7
	ENSG00000177697	11	836337	CD151	ENSG00000111328	12	123751204	CDK2AP1	0.290949	0.0529774	3.97525e-08	7
	ENSG00000177697	11	836337	CD151	ENSG00000105507	19	48540260	CABP5	0.595839	0.0482475	4.89311e-35	9
	ENSG00000064201	11	2331328	TSPAN32	ENSG00000113721	5	149514411	PDGFRB	-0.182209	0.0233834	6.58222e-15	3
	ENSG00000133789	11	9730081	SWAP70	ENSG00000240505	17	16854140	TNFRSF13B	-0.174879	0.0310709	1.81901e-08	3
	ENSG00000175220	11	46710397	ARHGAP1	ENSG00000164850	7	1127647	GPER1	0.566218	0.101859	2.71556e-08	3
	ENSG00000134571	11	47363605	MYBPC3	ENSG00000139970	14	60200189	RTN1	0.1282	0.0159811	1.04084e-15	3
	ENSG00000134571	11	47363605	MYBPC3	ENSG00000214548	14	101286557	MEG3	-0.115577	0.0185947	5.114e-10	3
	ENSG00000066336	11	47388269	SPI1	ENSG00000139970	14	60200189	RTN1	-0.402997	0.0536668	5.94756e-14	3
	ENSG00000172247	11	47613713	C1QTNF4	ENSG00000214548	14	101286557	MEG3	-0.131041	0.0210819	5.10649e-10	3
	ENSG00000256269	11	118959917	HMBS	ENSG00000249992	3	45266864	TMEM158	0.269721	0.0470952	1.02133e-08	5
	ENSG00000256269	11	118959917	HMBS	ENSG00000203813	6	27778078	HIST1H3H	0.319046	0.0462847	5.45806e-12	6
	ENSG00000160703	11	119046001	NLRX1	ENSG00000158406	6	26283522	HIST1H4H	0.597829	0.0845377	1.52994e-12	3
	ENSG00000120647	12	525125	CCDC77	ENSG00000149573	11	118129684	MPZL2	-0.136887	0.0243111	1.79563e-08	3
	ENSG00000111321	12	6492472	LTBR	ENSG00000157017	3	10330995	GHRL	0.399893	0.0566782	1.71972e-12	4
	ENSG00000111321	12	6492472	LTBR	ENSG00000146232	6	44229701	NFKBIE	0.305378	0.044207	4.91817e-12	5
	ENSG00000150045	12	9988841	KLRF1	ENSG00000198821	1	167443862	CD247	0.4069	0.0683903	2.68683e-09	4
	ENSG00000150045	12	9988841	KLRF1	ENSG00000167094	9	130486112	TTC16	-0.435664	0.0605141	6.0489e-13	6
	ENSG00000150045	12	9988841	KLRF1	ENSG00000169583	9	139890171	CLIC3	0.803249	0.0873798	3.83366e-20	4
	ENSG00000150045	12	9988841	KLRF1	ENSG00000196139	10	5113713	AKR1C3	0.382934	0.0671265	1.16582e-08	4
	ENSG00000139112	12	10370392	GABARAPL1	ENSG00000137441	4	15966399	FGFBP2	0.527352	0.0796247	3.52045e-11	3
	ENSG00000139112	12	10370392	GABARAPL1	ENSG00000141736	17	37865423	ERBB2	0.477518	0.0770923	5.86183e-10	3
	ENSG00000167528	12	48739494	ZNF641	ENSG00000230257	7	102621636	NFE4	-0.304543	0.0486778	3.94228e-10	3
	ENSG00000248265	12	54484028	ENSG00000248265	ENSG00000103342	16	11985962	GSPT1	-0.185745	0.03367	3.45529e-08	3
	ENSG00000123405	12	54690400	NFE2	ENSG00000168067	11	64563501	MAP4K2	0.316882	0.0450433	1.9917e-12	3
	ENSG00000139572	12	54757250	GPR84	ENSG00000126091	1	44284163	ST3GAL3	0.282372	0.0488569	7.48904e-09	3
	ENSG00000139572	12	54757250	GPR84	ENSG00000187800	1	156874858	PEAR1	0.33935	0.0536445	2.51772e-10	3
	ENSG00000139572	12	54757250	GPR84	ENSG00000197959	1	172099113	DNM3	-0.299669	0.0489888	9.53002e-10	3
	ENSG00000139572	12	54757250	GPR84	ENSG00000117586	1	173164662	TNFSF4	-0.313868	0.0492771	1.89717e-10	3
	ENSG00000139572	12	54757250	GPR84	ENSG00000150681	1	192141266	RGS18	-0.377478	0.0502052	5.5322e-14	3
	ENSG00000139572	12	54757250	GPR84	ENSG00000074416	3	127474980	MGLL	0.376029	0.0501033	6.13926e-14	3
	ENSG00000139572	12	54757250	GPR84	ENSG00000169313	3	151078884	P2RY12	-0.42044	0.0509735	1.60791e-16	3
	ENSG00000139572	12	54757250	GPR84	ENSG00000127252	3	192977220	HRASLS	0.542543	0.091442	2.97101e-09	3
	ENSG00000139572	12	54757250	GPR84	ENSG00000163736	4	74853334	PPBP	0.296316	0.0488295	1.29201e-09	3
	ENSG00000139572	12	54757250	GPR84	ENSG00000153071	5	39417091	DAB2	-0.324838	0.0535131	1.27707e-09	3
	ENSG00000139572	12	54757250	GPR84	ENSG00000068796	5	61717532	KIF2A	0.287139	0.048754	3.87258e-09	3
	ENSG00000139572	12	54757250	GPR84	ENSG00000168274	6	26217438	HIST1H2AE	-0.338107	0.0494563	8.11556e-12	3
	ENSG00000139572	12	54757250	GPR84	ENSG00000203813	6	27778078	HIST1H3H	-0.303189	0.0489018	5.64813e-10	3
	ENSG00000139572	12	54757250	GPR84	ENSG00000161911	6	41119577	TREML1	0.452868	0.051417	1.27685e-18	3
	ENSG00000139572	12	54757250	GPR84	ENSG00000198478	6	80377186	SH3BGRL2	0.497291	0.0523736	2.20067e-21	3
	ENSG00000139572	12	54757250	GPR84	ENSG00000180354	7	30188402	C7orf41	0.523927	0.0566595	2.30994e-20	3
	ENSG00000139572	12	54757250	GPR84	ENSG00000127920	7	93553421	GNG11	0.588725	0.0542343	1.88334e-27	3
	ENSG00000139572	12	54757250	GPR84	ENSG00000137076	9	35714668	TLN1	0.35713	0.049714	6.78549e-13	3
	ENSG00000139572	12	54757250	GPR84	ENSG00000081377	9	99317317	CDC14B	0.321376	0.0493287	7.26972e-11	3
	ENSG00000139572	12	54757250	GPR84	ENSG00000136929	9	100698105	HEMGN	-0.274612	0.0485941	1.59393e-08	3
	ENSG00000139572	12	54757250	GPR84	ENSG00000095303	9	125145403	PTGS1	0.428807	0.0510506	4.47799e-17	3
	ENSG00000139572	12	54757250	GPR84	ENSG00000035403	10	75818895	VCL	0.433029	0.0536765	7.18195e-16	3
	ENSG00000139572	12	54757250	GPR84	ENSG00000168067	11	64563501	MAP4K2	0.336743	0.0494417	9.69859e-12	3
	ENSG00000139572	12	54757250	GPR84	ENSG00000085733	11	70263600	CTTN	0.47604	0.0519449	4.98533e-20	3
	ENSG00000139572	12	54757250	GPR84	ENSG00000149218	11	94844391	ENDOD1	0.304518	0.0493487	6.79665e-10	3
	ENSG00000139572	12	54757250	GPR84	ENSG00000154146	11	124613849	NRGN	0.356426	0.0497239	7.60433e-13	3
	ENSG00000139572	12	54757250	GPR84	ENSG00000166086	11	133980358	JAM3	0.372466	0.0499342	8.70869e-14	3
	ENSG00000139572	12	54757250	GPR84	ENSG00000177119	12	45721978	ANO6	0.440097	0.0549316	1.13102e-15	3
	ENSG00000139572	12	54757250	GPR84	ENSG00000235162	12	105709471	C12orf75	0.295607	0.0488743	1.46361e-09	3
	ENSG00000139572	12	54757250	GPR84	ENSG00000129473	14	23774483	BCL2L2	0.270668	0.048468	2.34412e-08	3
	ENSG00000139572	12	54757250	GPR84	ENSG00000166091	14	23847499	CMTM5	0.357433	0.0498321	7.35108e-13	3
	ENSG00000139572	12	54757250	GPR84	ENSG00000156381	14	102974657	ANKRD9	0.372727	0.0500504	9.54654e-14	3
	ENSG00000139572	12	54757250	GPR84	ENSG00000137801	15	39882473	THBS1	0.354641	0.0496202	8.86201e-13	3
	ENSG00000139572	12	54757250	GPR84	ENSG00000166963	15	43813487	MAP1A	0.388706	0.0504675	1.33826e-14	3
	ENSG00000139572	12	54757250	GPR84	ENSG00000140479	15	101953111	PCSK6	0.309537	0.049323	3.48017e-10	3
	ENSG00000139572	12	54757250	GPR84	ENSG00000103184	16	5038738	SEC14L5	0.30879	0.049421	4.15356e-10	3
	ENSG00000139572	12	54757250	GPR84	ENSG00000140682	16	31486093	TGFB1I1	0.313479	0.049294	2.02578e-10	3
	ENSG00000139572	12	54757250	GPR84	ENSG00000108839	17	6906719	ALOX12	0.344549	0.0494812	3.32553e-12	3
	ENSG00000139572	12	54757250	GPR84	ENSG00000205309	17	17228813	NT5M	0.296835	0.0496047	2.17717e-09	3
	ENSG00000139572	12	54757250	GPR84	ENSG00000108960	17	53484663	MMD	0.326112	0.0491409	3.21727e-11	3
	ENSG00000139572	12	54757250	GPR84	ENSG00000108387	17	56607895	SEPTIN4	-0.336696	0.0493816	9.21529e-12	3
	ENSG00000139572	12	54757250	GPR84	ENSG00000160014	19	47109190	CALM3	0.285445	0.0487985	4.93164e-09	3
	ENSG00000139572	12	54757250	GPR84	ENSG00000088826	20	4135010	SMOX	0.298624	0.0489464	1.05386e-09	3
	ENSG00000139572	12	54757250	GPR84	ENSG00000184702	22	19707141	SEPTIN5	0.397724	0.0505299	3.51627e-15	3
	ENSG00000139572	12	54757250	GPR84	ENSG00000128245	22	32347018	YWHAH	0.289548	0.0488525	3.0856e-09	3
	ENSG00000139572	12	54757250	GPR84	ENSG00000100351	22	40333405	GRAP2	0.308203	0.0491336	3.54695e-10	3
	ENSG00000161642	12	54773999	ZNF385A	ENSG00000010327	3	52543932	STAB1	0.751843	0.0839041	3.22503e-19	5
	ENSG00000161642	12	54773999	ZNF385A	ENSG00000118855	3	158498747	MFSD1	0.586606	0.064923	1.63384e-19	7
	ENSG00000161642	12	54773999	ZNF385A	ENSG00000055163	5	156757847	CYFIP2	-0.620678	0.0741776	5.88741e-17	6
	ENSG00000161642	12	54773999	ZNF385A	ENSG00000146416	6	143521537	AIG1	-0.399106	0.0649201	7.8642e-10	6
	ENSG00000161642	12	54773999	ZNF385A	ENSG00000108100	10	35698402	CCNY	0.423363	0.0660515	1.45908e-10	6
	ENSG00000161642	12	54773999	ZNF385A	ENSG00000136026	12	106664856	CKAP4	0.338769	0.0621094	4.91394e-08	6
	ENSG00000161642	12	54773999	ZNF385A	ENSG00000132205	18	2881509	EMILIN2	0.74129	0.0853624	3.81962e-18	5
	ENSG00000161642	12	54773999	ZNF385A	ENSG00000105518	19	11455323	TMEM205	0.723275	0.0842374	8.9929e-18	5
	ENSG00000076067	12	56950229	RBMS2	ENSG00000134668	1	32268837	SPOCD1	0.17795	0.0175769	4.31924e-24	6
	ENSG00000076067	12	56950229	RBMS2	ENSG00000143595	1	154295683	AQP10	0.101833	0.0176385	7.77005e-09	6
	ENSG00000090382	12	69745067	LYZ	ENSG00000172262	5	43128700	ZNF131	0.400135	0.0139766	2.93076e-180	5
	ENSG00000090382	12	69745067	LYZ	ENSG00000095627	10	115965546	ENSG00000095627	-0.0797873	0.0135699	4.10958e-09	6
	ENSG00000090382	12	69745067	LYZ	ENSG00000258730	14	93536147	ITPK1-AS1	-0.342092	0.0161573	1.70608e-99	6
	ENSG00000090382	12	69745067	LYZ	ENSG00000247092	14	95999921	SNHG10	0.147957	0.0153015	4.06607e-22	6
	ENSG00000090382	12	69745067	LYZ	ENSG00000161551	19	52376629	ZNF577	-0.0796154	0.0133122	2.22245e-09	6
	ENSG00000127337	12	69769029	YEATS4	ENSG00000011258	17	49296155	MBTD1	-0.0928476	0.012861	5.22401e-13	3
	ENSG00000127337	12	69769029	YEATS4	ENSG00000161551	19	52376629	ZNF577	-0.0824608	0.0127329	9.40602e-11	3
	ENSG00000127337	12	69769029	YEATS4	ENSG00000101439	20	23613822	CST3	-0.0855711	0.0126295	1.23978e-11	3
	ENSG00000111275	12	112226236	ALDH2	ENSG00000162496	1	12652838	DHRS3	-0.135272	0.0230731	4.55256e-09	15
	ENSG00000111275	12	112226236	ALDH2	ENSG00000117228	1	89524522	GBP1	-0.183372	0.0232918	3.46795e-15	14
	ENSG00000111275	12	112226236	ALDH2	ENSG00000162645	1	89593977	GBP2	-0.183467	0.0231246	2.12452e-15	14
	ENSG00000111275	12	112226236	ALDH2	ENSG00000154451	1	89731588	GBP5	-0.30272	0.0357292	2.39936e-17	14
	ENSG00000111275	12	112226236	ALDH2	ENSG00000188641	1	97964952	DPYD	0.25023	0.0368182	1.07299e-11	14
	ENSG00000111275	12	112226236	ALDH2	ENSG00000134243	1	109896382	SORT1	0.328925	0.035869	4.72218e-20	13
	ENSG00000111275	12	112226236	ALDH2	ENSG00000068784	2	45727561	SRBD1	-0.13451	0.0235846	1.17515e-08	14
	ENSG00000111275	12	112226236	ALDH2	ENSG00000172005	2	95705579	MAL	-0.131397	0.0230728	1.23448e-08	15
	ENSG00000111275	12	112226236	ALDH2	ENSG00000088179	2	120629300	PTPN4	-0.135808	0.0229175	3.10529e-09	15
	ENSG00000111275	12	112226236	ALDH2	ENSG00000169554	2	145213857	ZEB2	0.225341	0.0352771	1.68365e-10	13
	ENSG00000111275	12	112226236	ALDH2	ENSG00000135905	2	225768484	DOCK10	-0.146354	0.0257511	1.32026e-08	14
	ENSG00000111275	12	112226236	ALDH2	ENSG00000206561	3	15527449	COLQ	-0.131518	0.0229334	9.76519e-09	15
	ENSG00000111275	12	112226236	ALDH2	ENSG00000186265	3	112200611	BTLA	-0.200655	0.0345731	6.48388e-09	13
	ENSG00000111275	12	112226236	ALDH2	ENSG00000138496	3	122265097	PARP9	-0.182584	0.0232661	4.23937e-15	15
	ENSG00000111275	12	112226236	ALDH2	ENSG00000173193	3	122424576	PARP14	-0.137	0.0232695	3.92003e-09	14
	ENSG00000111275	12	112226236	ALDH2	ENSG00000174944	3	150963080	P2RY14	-0.134774	0.0230791	5.23122e-09	15
	ENSG00000111275	12	112226236	ALDH2	ENSG00000114346	3	172503868	ECT2	0.138823	0.0232015	2.18555e-09	15
	ENSG00000111275	12	112226236	ALDH2	ENSG00000091490	4	25807218	SEL1L3	-0.26515	0.0338741	4.97627e-15	14
	ENSG00000111275	12	112226236	ALDH2	ENSG00000135046	9	75775991	ANXA1	0.156356	0.0249813	3.87588e-10	14
	ENSG00000111275	12	112226236	ALDH2	ENSG00000136867	9	115919819	SLC31A2	0.182366	0.0239807	2.8555e-14	13
	ENSG00000111275	12	112226236	ALDH2	ENSG00000156587	11	57327443	UBE2L6	-0.14626	0.0229909	1.99581e-10	15
	ENSG00000111275	12	112226236	ALDH2	ENSG00000149131	11	57373593	SERPING1	-0.137186	0.0228384	1.89187e-09	15
	ENSG00000111275	12	112226236	ALDH2	ENSG00000077514	11	74292529	POLD3	0.143525	0.0232136	6.29804e-10	15
	ENSG00000111275	12	112226236	ALDH2	ENSG00000118971	12	4398727	CCND2	-0.14223	0.0238035	2.2986e-09	14
	ENSG00000111275	12	112226236	ALDH2	ENSG00000250510	12	6933648	GPR162	0.156217	0.0237753	5.01227e-11	13
	ENSG00000111275	12	112226236	ALDH2	ENSG00000070961	12	90042452	ATP2B1	0.136119	0.0229231	2.88386e-09	15
	ENSG00000111275	12	112226236	ALDH2	ENSG00000214274	14	21159733	ANG	0.195625	0.0241981	6.25062e-16	14
	ENSG00000111275	12	112226236	ALDH2	ENSG00000165801	14	21548414	ARHGEF40	0.191037	0.0263102	3.84346e-13	13
	ENSG00000111275	12	112226236	ALDH2	ENSG00000054654	14	64506424	SYNE2	-0.171843	0.0237107	4.24635e-13	14
	ENSG00000111275	12	112226236	ALDH2	ENSG00000167207	16	50747251	NOD2	0.21461	0.0338815	2.38647e-10	14
	ENSG00000111275	12	112226236	ALDH2	ENSG00000159714	16	67439529	ZDHHC1	0.162272	0.0238962	1.11589e-11	14
	ENSG00000111275	12	112226236	ALDH2	ENSG00000108679	17	76971755	LGALS3BP	-0.171681	0.0233378	1.88978e-13	14
	ENSG00000111275	12	112226236	ALDH2	ENSG00000173762	17	80274111	CD7	-0.128897	0.0230474	2.23582e-08	15
	ENSG00000111275	12	112226236	ALDH2	ENSG00000171791	18	60888970	BCL2	-0.158149	0.0230771	7.22695e-12	15
	ENSG00000111275	12	112226236	ALDH2	ENSG00000101337	20	30726185	TM9SF4	0.13762	0.0234415	4.33757e-09	15
	ENSG00000111275	12	112226236	ALDH2	ENSG00000124181	20	39795513	PLCG1	-0.137368	0.0236078	5.92864e-09	14
	ENSG00000111275	12	112226236	ALDH2	ENSG00000100385	22	37546486	IL2RB	-0.170875	0.0231515	1.5742e-13	15
	ENSG00000150907	13	41185269	FOXO1	ENSG00000116574	1	228876620	RHOU	-0.615332	0.0885596	3.69914e-12	3
	ENSG00000155465	14	23270730	SLC7A7	ENSG00000071967	2	172396700	CYBRD1	0.419638	0.0558396	5.68901e-14	7
	ENSG00000155465	14	23270730	SLC7A7	ENSG00000179921	2	219126400	GPBAR1	0.538438	0.0637036	2.85781e-17	6
	ENSG00000155465	14	23270730	SLC7A7	ENSG00000109667	4	9914668	SLC2A9	0.714131	0.0853389	5.85141e-17	4
	ENSG00000155465	14	23270730	SLC7A7	ENSG00000136830	9	130304443	FAM129B	0.380036	0.0606142	3.61634e-10	6
	ENSG00000155465	14	23270730	SLC7A7	ENSG00000187796	9	139262244	CARD9	0.487448	0.0649108	5.935e-14	7
	ENSG00000155465	14	23270730	SLC7A7	ENSG00000214063	11	854962	TSPAN4	0.381397	0.0557663	7.9641e-12	7
	ENSG00000155465	14	23270730	SLC7A7	ENSG00000084207	11	67352598	GSTP1	0.679196	0.0653234	2.54686e-25	6
	ENSG00000155465	14	23270730	SLC7A7	ENSG00000132205	18	2881509	EMILIN2	0.593005	0.0673161	1.25969e-18	6
	ENSG00000155465	14	23270730	SLC7A7	ENSG00000104918	19	7734632	RETN	0.46946	0.0594697	2.92414e-15	6
	ENSG00000155465	14	23270730	SLC7A7	ENSG00000105383	19	51737717	CD33	0.663982	0.067369	6.46436e-23	6
	ENSG00000155465	14	23270730	SLC7A7	ENSG00000101439	20	23613822	CST3	0.436552	0.0646796	1.48393e-11	5
	ENSG00000092020	14	35573198	PPP2R3C	ENSG00000157017	3	10330995	GHRL	-0.167334	0.0175279	1.33895e-21	3
	ENSG00000092020	14	35573198	PPP2R3C	ENSG00000104320	8	90980510	NBN	-0.0843843	0.0120827	2.87048e-12	3
	ENSG00000092020	14	35573198	PPP2R3C	ENSG00000147168	14	70329606	IL2RG	-0.15517	0.0217853	1.05857e-12	3
	ENSG00000258289	14	65396194	CHURC1	ENSG00000206177	16	210329	HBM	0.105367	0.0179749	4.5765e-09	3
	ENSG00000125952	14	65521152	MAX	ENSG00000153574	2	89020807	RPIA	-0.297337	0.0516176	8.3925e-09	3
	ENSG00000214548	14	101286557	MEG3	ENSG00000163703	3	9981301	CRELD1	-0.148302	0.0151973	1.69727e-22	8
	ENSG00000075413	14	103910948	MARK3	ENSG00000038427	5	82822703	VCAN	-0.141947	0.0226709	3.82003e-10	3
	ENSG00000104093	15	51827469	DMXL2	ENSG00000138646	4	89402791	HERC5	-0.351914	0.0511657	6.07301e-12	5
	ENSG00000104093	15	51827469	DMXL2	ENSG00000185745	10	91158024	IFIT1	-0.287523	0.0490349	4.52817e-09	5
	ENSG00000104093	15	51827469	DMXL2	ENSG00000157601	21	42811686	MX1	-0.310892	0.049415	3.14543e-10	5
	ENSG00000128872	15	52076161	TMOD2	ENSG00000137959	1	79097045	IFI44L	0.193912	0.0317022	9.55514e-10	5
	ENSG00000128872	15	52076161	TMOD2	ENSG00000137965	1	79122622	IFI44	0.176665	0.0319446	3.19577e-08	5
	ENSG00000130656	16	203594	HBZ	ENSG00000173876	10	106465	ENSG00000173876	-0.146884	0.0238384	7.19923e-10	8
	ENSG00000130656	16	203594	HBZ	ENSG00000261812	16	90161162	TUBB8P7	-0.163559	0.0251765	8.22027e-11	8
	ENSG00000130656	16	203594	HBZ	ENSG00000108309	17	42390910	RUNDC3A	-0.0891389	0.0121034	1.7747e-13	7
	ENSG00000130656	16	203594	HBZ	ENSG00000173213	18	60385	RP11-683L23.1	-0.149157	0.0252571	3.51491e-09	8
	ENSG00000167930	16	302243	ITFG3	ENSG00000159247	9	141058193	TUBBP5	-0.362856	0.0625898	6.73663e-09	4
	ENSG00000167930	16	302243	ITFG3	ENSG00000173876	10	106465	ENSG00000173876	-0.654498	0.0777604	3.86718e-17	4
	ENSG00000167930	16	302243	ITFG3	ENSG00000261812	16	90161162	TUBB8P7	-0.71346	0.0842123	2.40882e-17	3
	ENSG00000167930	16	302243	ITFG3	ENSG00000108309	17	42390910	RUNDC3A	0.456282	0.0771122	3.27628e-09	3
	ENSG00000167930	16	302243	ITFG3	ENSG00000173213	18	60385	RP11-683L23.1	-0.650863	0.0827842	3.77543e-15	4
	ENSG00000180185	16	1883588	FAHD1	ENSG00000189060	22	38202278	H1F0	-0.321307	0.0537559	2.27093e-09	3
	ENSG00000188322	16	28319505	SBK1	ENSG00000125462	1	156387268	C1orf61	0.245625	0.0433519	1.46311e-08	3
	ENSG00000188322	16	28319505	SBK1	ENSG00000140511	15	89429688	HAPLN3	0.348163	0.0460738	4.136e-14	3
	ENSG00000188322	16	28319505	SBK1	ENSG00000205220	16	67969697	PSMB10	0.259028	0.045453	1.20648e-08	3
	ENSG00000188322	16	28319505	SBK1	ENSG00000108679	17	76971755	LGALS3BP	0.305452	0.0462791	4.10595e-11	3
	ENSG00000261067	16	28994110	ENSG00000261067	ENSG00000117228	1	89524522	GBP1	-0.665403	0.0855188	7.2078e-15	3
	ENSG00000261067	16	28994110	ENSG00000261067	ENSG00000162645	1	89593977	GBP2	-0.582669	0.0824684	1.602e-12	3
	ENSG00000261067	16	28994110	ENSG00000261067	ENSG00000185499	1	155160503	MUC1	-0.408413	0.0716607	1.2033e-08	3
	ENSG00000261067	16	28994110	ENSG00000261067	ENSG00000134470	10	6005594	IL15RA	-0.421884	0.0722563	5.26039e-09	3
	ENSG00000261067	16	28994110	ENSG00000261067	ENSG00000156587	11	57327443	UBE2L6	-0.510682	0.0792979	1.19431e-10	3
	ENSG00000261067	16	28994110	ENSG00000261067	ENSG00000125148	16	56642760	MT2A	-0.451251	0.0779325	7.02725e-09	3
	ENSG00000261067	16	28994110	ENSG00000261067	ENSG00000205220	16	67969697	PSMB10	-0.487433	0.0734577	3.23288e-11	3
	ENSG00000261067	16	28994110	ENSG00000261067	ENSG00000128284	22	36549298	APOL3	-0.628706	0.081499	1.21667e-14	3
	ENSG00000005844	16	30509242	ITGAL	ENSG00000005379	17	56392372	BZRAP1	-0.210188	0.0366517	9.76592e-09	4
	ENSG00000103496	16	31049253	STX4	ENSG00000166171	10	103349871	DPCD	0.133303	0.0232263	9.50469e-09	3
	ENSG00000103496	16	31049253	STX4	ENSG00000095932	19	3477472	C19orf77	0.149694	0.025535	4.56457e-09	3
	ENSG00000103496	16	31049253	STX4	ENSG00000138867	22	24944154	GUCD1	0.17112	0.025696	2.74959e-11	3
	ENSG00000103496	16	31049253	STX4	ENSG00000100346	22	40026250	CACNA1I	-0.143959	0.0238312	1.53357e-09	3
	ENSG00000167394	16	31078902	ZNF668	ENSG00000071967	2	172396700	CYBRD1	-0.142562	0.0240177	2.92547e-09	3
	ENSG00000167394	16	31078902	ZNF668	ENSG00000164512	5	55462346	ANKRD55	0.155741	0.0242561	1.35667e-10	3
	ENSG00000167394	16	31078902	ZNF668	ENSG00000100346	22	40026250	CACNA1I	0.145685	0.0244835	2.67595e-09	3
	ENSG00000103507	16	31120769	BCKDK	ENSG00000164512	5	55462346	ANKRD55	0.189865	0.032221	3.80157e-09	5
	ENSG00000103507	16	31120769	BCKDK	ENSG00000100346	22	40026250	CACNA1I	0.180364	0.0321195	1.96091e-08	5
	ENSG00000140853	16	57070420	NLRC5	ENSG00000186470	6	26371966	BTN3A2	0.276366	0.0402258	6.404e-12	3
	ENSG00000158792	16	89765432	SPATA2L	ENSG00000166997	7	99720185	CNPY4	-0.160519	0.0255364	3.25988e-10	3
	ENSG00000158792	16	89765432	SPATA2L	ENSG00000166816	16	75148213	LDHD	0.154673	0.0255353	1.38501e-09	3
	ENSG00000091640	17	4866844	SPAG7	ENSG00000136689	2	113878192	IL1RN	-0.103602	0.0169178	9.13375e-10	5
	ENSG00000109113	17	27043373	RAB34	ENSG00000076864	1	21959254	RAP1GAP	-0.244115	0.0430751	1.45167e-08	3
	ENSG00000109113	17	27043373	RAB34	ENSG00000148908	10	121280780	RGS10	0.259763	0.0433057	1.99319e-09	3
	ENSG00000109113	17	27043373	RAB34	ENSG00000130159	19	11628360	ECSIT	-0.254548	0.0444603	1.03258e-08	3
	ENSG00000161395	17	37840212	PGAP3	ENSG00000171476	4	57531110	HOPX	0.158544	0.0269934	4.26852e-09	3
	ENSG00000161395	17	37840212	PGAP3	ENSG00000106537	7	16808660	TSPAN13	0.143701	0.0260117	3.30435e-08	3
	ENSG00000161395	17	37840212	PGAP3	ENSG00000149294	11	112990577	NCAM1	0.175374	0.0265011	3.65042e-11	3
	ENSG00000161395	17	37840212	PGAP3	ENSG00000100721	14	96178418	TCL1A	0.172975	0.0270252	1.5488e-10	3
	ENSG00000161395	17	37840212	PGAP3	ENSG00000104921	19	7760338	FCER2	0.158487	0.0263822	1.886e-09	3
	ENSG00000161395	17	37840212	PGAP3	ENSG00000128218	22	24095792	VPREB3	0.159365	0.0264848	1.77412e-09	3
	ENSG00000161395	17	37840212	PGAP3	ENSG00000133424	22	33993838	LARGE	0.159189	0.0257284	6.12058e-10	3
	ENSG00000141736	17	37865423	ERBB2	ENSG00000115523	2	85919137	GNLY	0.594239	0.0663426	3.33239e-19	6
	ENSG00000141736	17	37865423	ERBB2	ENSG00000145649	5	54402278	GZMA	0.37162	0.0636014	5.12862e-09	6
	ENSG00000141736	17	37865423	ERBB2	ENSG00000180644	10	72359817	PRF1	0.570848	0.0585352	1.805e-22	8
	ENSG00000141736	17	37865423	ERBB2	ENSG00000204466	17	50161072	DGKK	0.651552	0.093914	3.98395e-12	7
	ENSG00000161405	17	37970819	IKZF3	ENSG00000143185	1	168511619	XCL2	-0.263003	0.0432307	1.17441e-09	3
	ENSG00000161405	17	37970819	IKZF3	ENSG00000135862	1	183053661	LAMC1	-0.121512	0.0200151	1.27094e-09	3
	ENSG00000161405	17	37970819	IKZF3	ENSG00000117009	1	241727189	KMO	-0.124521	0.020073	5.52581e-10	3
	ENSG00000161405	17	37970819	IKZF3	ENSG00000171476	4	57531110	HOPX	-0.163051	0.0202418	7.93602e-16	3
	ENSG00000161405	17	37970819	IKZF3	ENSG00000035720	4	68448750	STAP1	-0.176284	0.0220416	1.26681e-15	3
	ENSG00000161405	17	37970819	IKZF3	ENSG00000164056	4	124321430	SPRY1	-0.110007	0.0200718	4.2366e-08	3
	ENSG00000161405	17	37970819	IKZF3	ENSG00000145649	5	54402278	GZMA	-0.115635	0.0199002	6.22e-09	3
	ENSG00000161405	17	37970819	IKZF3	ENSG00000112182	6	90821437	BACH2	-0.111565	0.0201257	2.9667e-08	3
	ENSG00000161405	17	37970819	IKZF3	ENSG00000236901	9	125874764	MIR600HG	-0.141434	0.0224023	2.73072e-10	3
	ENSG00000161405	17	37970819	IKZF3	ENSG00000165209	9	125951317	STRBP	-0.122654	0.0200627	9.74565e-10	3
	ENSG00000161405	17	37970819	IKZF3	ENSG00000149294	11	112990577	NCAM1	-0.199137	0.0203123	1.08478e-22	3
	ENSG00000161405	17	37970819	IKZF3	ENSG00000139174	12	42918148	PRICKLE1	-0.146005	0.0220267	3.38972e-11	3
	ENSG00000161405	17	37970819	IKZF3	ENSG00000213231	14	96155867	TCL1B	-0.158211	0.0223515	1.45924e-12	3
	ENSG00000161405	17	37970819	IKZF3	ENSG00000077238	16	27350544	IL4R	-0.140184	0.020186	3.79581e-12	3
	ENSG00000161405	17	37970819	IKZF3	ENSG00000108370	17	63178685	RGS9	-0.111746	0.0202683	3.52124e-08	3
	ENSG00000161405	17	37970819	IKZF3	ENSG00000141622	18	43974937	RNF165	-0.126152	0.0201326	3.70271e-10	3
	ENSG00000161405	17	37970819	IKZF3	ENSG00000104921	19	7760338	FCER2	-0.186987	0.0202469	2.57551e-20	3
	ENSG00000161405	17	37970819	IKZF3	ENSG00000160307	21	48021998	S100B	-0.222058	0.0300392	1.44346e-13	3
	ENSG00000161405	17	37970819	IKZF3	ENSG00000133424	22	33993838	LARGE	-0.14757	0.0199532	1.40587e-13	3
	ENSG00000161405	17	37970819	IKZF3	ENSG00000204466	17	50161072	DGKK	0.248726	0.0378889	5.21642e-11	3
	ENSG00000073605	17	38068477	GSDMB	ENSG00000069702	1	92258897	TGFBR3	0.0589823	0.00959894	8.01291e-10	5
	ENSG00000073605	17	38068477	GSDMB	ENSG00000132185	1	161680452	FCRLA	0.0742045	0.00970344	2.05341e-14	5
	ENSG00000073605	17	38068477	GSDMB	ENSG00000143185	1	168511619	XCL2	0.116257	0.0212269	4.32956e-08	5
	ENSG00000073605	17	38068477	GSDMB	ENSG00000135862	1	183053661	LAMC1	0.0528192	0.00968721	4.96738e-08	5
	ENSG00000073605	17	38068477	GSDMB	ENSG00000135842	1	184851770	FAM129A	0.0573633	0.00964819	2.75618e-09	3
	ENSG00000073605	17	38068477	GSDMB	ENSG00000117322	1	207645407	CR2	0.0703838	0.00971913	4.42835e-13	5
	ENSG00000073605	17	38068477	GSDMB	ENSG00000197520	1	222917348	FAM177B	0.0579286	0.00967991	2.1717e-09	5
	ENSG00000073605	17	38068477	GSDMB	ENSG00000117009	1	241727189	KMO	0.0682308	0.00964516	1.50427e-12	5
	ENSG00000073605	17	38068477	GSDMB	ENSG00000119866	2	60729502	BCL11A	0.0729423	0.00965017	4.0728e-14	5
	ENSG00000073605	17	38068477	GSDMB	ENSG00000115523	2	85919137	GNLY	0.0623683	0.00960058	8.2318e-11	5
	ENSG00000073605	17	38068477	GSDMB	ENSG00000115607	2	103052087	IL18RAP	0.0693745	0.00960744	5.16424e-13	5
	ENSG00000073605	17	38068477	GSDMB	ENSG00000150995	3	4712278	ITPR1	0.0555782	0.00960332	7.1485e-09	5
	ENSG00000073605	17	38068477	GSDMB	ENSG00000186265	3	112200611	BTLA	0.0671068	0.00971841	5.01599e-12	5
	ENSG00000073605	17	38068477	GSDMB	ENSG00000171476	4	57531110	HOPX	0.0795001	0.00964219	1.65128e-16	5
	ENSG00000073605	17	38068477	GSDMB	ENSG00000035720	4	68448750	STAP1	0.0905323	0.0106148	1.47746e-17	5
	ENSG00000073605	17	38068477	GSDMB	ENSG00000153064	4	102664206	BANK1	0.0804346	0.00960975	5.75656e-17	5
	ENSG00000073605	17	38068477	GSDMB	ENSG00000164056	4	124321430	SPRY1	0.0537692	0.00965417	2.55425e-08	5
	ENSG00000073605	17	38068477	GSDMB	ENSG00000145649	5	54402278	GZMA	0.0571055	0.00960537	2.76173e-09	5
	ENSG00000073605	17	38068477	GSDMB	ENSG00000081189	5	88106948	MEF2C	0.053042	0.00960444	3.3391e-08	5
	ENSG00000073605	17	38068477	GSDMB	ENSG00000171604	5	139045175	CXXC5	0.0612225	0.00960587	1.84825e-10	5
	ENSG00000073605	17	38068477	GSDMB	ENSG00000019582	5	149786846	CD74	0.0530938	0.00962818	3.49931e-08	4
	ENSG00000073605	17	38068477	GSDMB	ENSG00000164330	5	158324848	EBF1	0.0740478	0.00968704	2.10577e-14	5
	ENSG00000073605	17	38068477	GSDMB	ENSG00000112182	6	90821437	BACH2	0.0627637	0.00963846	7.42545e-11	5
	ENSG00000073605	17	38068477	GSDMB	ENSG00000152894	6	128565897	PTPRK	0.0586302	0.00961882	1.09191e-09	5
	ENSG00000073605	17	38068477	GSDMB	ENSG00000106537	7	16808660	TSPAN13	0.0782794	0.00968186	6.20819e-16	5
	ENSG00000073605	17	38068477	GSDMB	ENSG00000005471	7	87070382	ABCB4	0.0656676	0.0096268	9.01962e-12	5
	ENSG00000073605	17	38068477	GSDMB	ENSG00000104490	8	102917953	NCALD	0.0563453	0.00962968	4.8801e-09	5
	ENSG00000073605	17	38068477	GSDMB	ENSG00000136999	8	120432569	NOV	-0.0590942	0.00959588	7.3535e-10	4
	ENSG00000073605	17	38068477	GSDMB	ENSG00000137101	9	35628168	CD72	0.087108	0.0141702	7.88402e-10	5
	ENSG00000073605	17	38068477	GSDMB	ENSG00000236901	9	125874764	MIR600HG	0.0670615	0.0106626	3.1872e-10	5
	ENSG00000073605	17	38068477	GSDMB	ENSG00000165209	9	125951317	STRBP	0.0619629	0.00968724	1.59145e-10	5
	ENSG00000073605	17	38068477	GSDMB	ENSG00000180644	10	72359817	PRF1	0.0680269	0.00960148	1.38999e-12	5
	ENSG00000073605	17	38068477	GSDMB	ENSG00000148926	11	10327585	ADM	0.0606499	0.00959773	2.62924e-10	4
	ENSG00000073605	17	38068477	GSDMB	ENSG00000149294	11	112990577	NCAM1	0.103919	0.00969778	8.58325e-27	5
	ENSG00000073605	17	38068477	GSDMB	ENSG00000139174	12	42918148	PRICKLE1	0.071753	0.0106438	1.57003e-11	5
	ENSG00000073605	17	38068477	GSDMB	ENSG00000100453	14	25101816	GZMB	0.068869	0.0105063	5.56276e-11	5
	ENSG00000073605	17	38068477	GSDMB	ENSG00000213231	14	96155867	TCL1B	0.0753574	0.0107501	2.3843e-12	5
	ENSG00000073605	17	38068477	GSDMB	ENSG00000100721	14	96178418	TCL1A	0.102355	0.00996133	9.11608e-25	5
	ENSG00000073605	17	38068477	GSDMB	ENSG00000077238	16	27350544	IL4R	0.0694121	0.00967647	7.32218e-13	5
	ENSG00000073605	17	38068477	GSDMB	ENSG00000007312	17	62007907	CD79B	0.0814144	0.00973749	6.2228e-17	5
	ENSG00000073605	17	38068477	GSDMB	ENSG00000108370	17	63178685	RGS9	0.0580458	0.00964103	1.73659e-09	5
	ENSG00000073605	17	38068477	GSDMB	ENSG00000087157	17	76397958	PGS1	0.0550186	0.0096275	1.09877e-08	4
	ENSG00000073605	17	38068477	GSDMB	ENSG00000197705	18	30302829	KLHL14	0.0531908	0.00960839	3.09694e-08	4
	ENSG00000073605	17	38068477	GSDMB	ENSG00000141622	18	43974937	RNF165	0.064818	0.00965462	1.89773e-11	5
	ENSG00000073605	17	38068477	GSDMB	ENSG00000104921	19	7760338	FCER2	0.0903321	0.00964677	7.67925e-21	5
	ENSG00000073605	17	38068477	GSDMB	ENSG00000012124	19	35824211	CD22	0.0776742	0.00965194	8.44821e-16	5
	ENSG00000073605	17	38068477	GSDMB	ENSG00000105369	19	42383314	CD79A	0.0876708	0.00975179	2.46711e-19	5
	ENSG00000073605	17	38068477	GSDMB	ENSG00000154734	21	28213167	ADAMTS1	0.0542213	0.00973139	2.52127e-08	5
	ENSG00000073605	17	38068477	GSDMB	ENSG00000160307	21	48021998	S100B	0.104963	0.0143553	2.63574e-13	5
	ENSG00000073605	17	38068477	GSDMB	ENSG00000128218	22	24095792	VPREB3	0.0921962	0.00969508	1.91413e-21	5
	ENSG00000073605	17	38068477	GSDMB	ENSG00000133424	22	33993838	LARGE	0.0838042	0.00961038	2.77757e-18	5
	ENSG00000073605	17	38068477	GSDMB	ENSG00000204466	17	50161072	DGKK	-0.10611	0.0176132	1.69661e-09	5
	ENSG00000172057	17	38080574	ORMDL3	ENSG00000069702	1	92258897	TGFBR3	0.0682876	0.0108848	3.52694e-10	5
	ENSG00000172057	17	38080574	ORMDL3	ENSG00000132185	1	161680452	FCRLA	0.0842053	0.0109581	1.53843e-14	5
	ENSG00000172057	17	38080574	ORMDL3	ENSG00000143185	1	168511619	XCL2	0.132084	0.023933	3.4112e-08	5
	ENSG00000172057	17	38080574	ORMDL3	ENSG00000135862	1	183053661	LAMC1	0.0605498	0.0108929	2.7188e-08	5
	ENSG00000172057	17	38080574	ORMDL3	ENSG00000135842	1	184851770	FAM129A	0.0636715	0.0109558	6.18505e-09	3
	ENSG00000172057	17	38080574	ORMDL3	ENSG00000117322	1	207645407	CR2	0.0802827	0.0109549	2.32739e-13	5
	ENSG00000172057	17	38080574	ORMDL3	ENSG00000197520	1	222917348	FAM177B	0.0647673	0.0109018	2.83349e-09	5
	ENSG00000172057	17	38080574	ORMDL3	ENSG00000117009	1	241727189	KMO	0.0778514	0.0108989	9.12659e-13	5
	ENSG00000172057	17	38080574	ORMDL3	ENSG00000119866	2	60729502	BCL11A	0.083601	0.0110434	3.72592e-14	5
	ENSG00000172057	17	38080574	ORMDL3	ENSG00000115523	2	85919137	GNLY	0.0717089	0.0108966	4.67712e-11	5
	ENSG00000172057	17	38080574	ORMDL3	ENSG00000115607	2	103052087	IL18RAP	0.0798217	0.0109642	3.33377e-13	5
	ENSG00000172057	17	38080574	ORMDL3	ENSG00000150995	3	4712278	ITPR1	0.0630651	0.0108941	7.08422e-09	5
	ENSG00000172057	17	38080574	ORMDL3	ENSG00000186265	3	112200611	BTLA	0.0761512	0.0109533	3.59281e-12	5
	ENSG00000172057	17	38080574	ORMDL3	ENSG00000171476	4	57531110	HOPX	0.0917356	0.0109421	5.12896e-17	5
	ENSG00000172057	17	38080574	ORMDL3	ENSG00000035720	4	68448750	STAP1	0.101067	0.0119694	3.07339e-17	5
	ENSG00000172057	17	38080574	ORMDL3	ENSG00000163625	4	85739124	WDFY3	0.389489	0.0625502	4.7597e-10	3
	ENSG00000172057	17	38080574	ORMDL3	ENSG00000153064	4	102664206	BANK1	0.0916092	0.0110368	1.03846e-16	5
	ENSG00000172057	17	38080574	ORMDL3	ENSG00000164056	4	124321430	SPRY1	0.061862	0.0109378	1.5514e-08	5
	ENSG00000172057	17	38080574	ORMDL3	ENSG00000145649	5	54402278	GZMA	0.0661619	0.0108954	1.25949e-09	5
	ENSG00000172057	17	38080574	ORMDL3	ENSG00000081189	5	88106948	MEF2C	0.0600447	0.0108933	3.54614e-08	5
	ENSG00000172057	17	38080574	ORMDL3	ENSG00000171604	5	139045175	CXXC5	0.0694754	0.010912	1.92947e-10	5
	ENSG00000172057	17	38080574	ORMDL3	ENSG00000019582	5	149786846	CD74	0.0606907	0.0110026	3.46702e-08	5
	ENSG00000172057	17	38080574	ORMDL3	ENSG00000164330	5	158324848	EBF1	0.0844055	0.0109674	1.40385e-14	5
	ENSG00000172057	17	38080574	ORMDL3	ENSG00000112182	6	90821437	BACH2	0.0724594	0.0109337	3.4226e-11	5
	ENSG00000172057	17	38080574	ORMDL3	ENSG00000152894	6	128565897	PTPRK	0.0663848	0.0108952	1.10773e-09	5
	ENSG00000172057	17	38080574	ORMDL3	ENSG00000106537	7	16808660	TSPAN13	0.08962	0.0109904	3.50987e-16	5
	ENSG00000172057	17	38080574	ORMDL3	ENSG00000005471	7	87070382	ABCB4	0.075262	0.0109195	5.48487e-12	5
	ENSG00000172057	17	38080574	ORMDL3	ENSG00000104490	8	102917953	NCALD	0.0648199	0.0109313	3.03426e-09	5
	ENSG00000172057	17	38080574	ORMDL3	ENSG00000136999	8	120432569	NOV	-0.0665352	0.0108894	9.95838e-10	4
	ENSG00000172057	17	38080574	ORMDL3	ENSG00000137101	9	35628168	CD72	0.097756	0.0160769	1.19776e-09	5
	ENSG00000172057	17	38080574	ORMDL3	ENSG00000236901	9	125874764	MIR600HG	0.0784842	0.0120959	8.66822e-11	5
	ENSG00000172057	17	38080574	ORMDL3	ENSG00000165209	9	125951317	STRBP	0.0711523	0.0109142	7.06723e-11	5
	ENSG00000172057	17	38080574	ORMDL3	ENSG00000180644	10	72359817	PRF1	0.0779858	0.0108995	8.36723e-13	5
	ENSG00000172057	17	38080574	ORMDL3	ENSG00000148926	11	10327585	ADM	0.0668439	0.0108938	8.46416e-10	4
	ENSG00000172057	17	38080574	ORMDL3	ENSG00000149294	11	112990577	NCAM1	0.117669	0.0109372	5.39457e-27	5
	ENSG00000172057	17	38080574	ORMDL3	ENSG00000139174	12	42918148	PRICKLE1	0.0820679	0.0120503	9.73168e-12	5
	ENSG00000172057	17	38080574	ORMDL3	ENSG00000100453	14	25101816	GZMB	0.0785982	0.011917	4.23869e-11	5
	ENSG00000172057	17	38080574	ORMDL3	ENSG00000213231	14	96155867	TCL1B	0.0862749	0.0121365	1.17118e-12	5
	ENSG00000172057	17	38080574	ORMDL3	ENSG00000100721	14	96178418	TCL1A	0.116663	0.0113434	8.26736e-25	5
	ENSG00000172057	17	38080574	ORMDL3	ENSG00000077238	16	27350544	IL4R	0.0799266	0.0110061	3.81415e-13	5
	ENSG00000172057	17	38080574	ORMDL3	ENSG00000007312	17	62007907	CD79B	0.0918917	0.0109734	5.5681e-17	5
	ENSG00000172057	17	38080574	ORMDL3	ENSG00000108370	17	63178685	RGS9	0.06713	0.0109398	8.44649e-10	5
	ENSG00000172057	17	38080574	ORMDL3	ENSG00000087157	17	76397958	PGS1	0.064931	0.0109861	3.41536e-09	3
	ENSG00000172057	17	38080574	ORMDL3	ENSG00000141622	18	43974937	RNF165	0.0733123	0.0109365	2.03555e-11	5
	ENSG00000172057	17	38080574	ORMDL3	ENSG00000104921	19	7760338	FCER2	0.103577	0.0109465	3.01846e-21	5
	ENSG00000172057	17	38080574	ORMDL3	ENSG00000012124	19	35824211	CD22	0.0894718	0.0109985	4.12281e-16	5
	ENSG00000172057	17	38080574	ORMDL3	ENSG00000105369	19	42383314	CD79A	0.0993306	0.0110641	2.76354e-19	5
	ENSG00000172057	17	38080574	ORMDL3	ENSG00000124225	20	56255020	PMEPA1	0.0599675	0.010911	3.88374e-08	5
	ENSG00000172057	17	38080574	ORMDL3	ENSG00000154734	21	28213167	ADAMTS1	0.0623433	0.0111709	2.39356e-08	5
	ENSG00000172057	17	38080574	ORMDL3	ENSG00000160307	21	48021998	S100B	0.119674	0.016192	1.45764e-13	5
	ENSG00000172057	17	38080574	ORMDL3	ENSG00000128218	22	24095792	VPREB3	0.104459	0.0109348	1.26104e-21	5
	ENSG00000172057	17	38080574	ORMDL3	ENSG00000133424	22	33993838	LARGE	0.0965433	0.0109066	8.61103e-19	5
	ENSG00000172057	17	38080574	ORMDL3	ENSG00000204466	17	50161072	None	-0.121758	0.0199864	1.11475e-09	5
	ENSG00000141698	17	39986929	NT5C3B	ENSG00000034152	17	21203268	MAP2K3	-0.114535	0.0200663	1.14406e-08	3
	ENSG00000260075	17	44507364	NSFP1	ENSG00000135423	12	56873467	GLS2	0.131955	0.0230358	1.01464e-08	3
	ENSG00000073969	17	44751432	NSF	ENSG00000135423	12	56873467	GLS2	-0.244277	0.0430452	1.3877e-08	3
	ENSG00000073969	17	44751432	NSF	ENSG00000108679	17	76971755	LGALS3BP	-0.246399	0.0434784	1.45187e-08	3
	ENSG00000073969	17	44751432	NSF	ENSG00000126267	19	36144444	COX6B1	0.236906	0.0433895	4.76213e-08	3
	ENSG00000167083	17	47284044	GNGT2	ENSG00000188389	2	242796546	PDCD1	-0.294496	0.0343942	1.10585e-17	3
	ENSG00000167083	17	47284044	GNGT2	ENSG00000188011	2	242813863	CXXC11	-0.267401	0.0346561	1.20187e-14	3
	ENSG00000167083	17	47284044	GNGT2	ENSG00000171617	5	73930241	ENC1	-0.180287	0.0315925	1.15241e-08	3
	ENSG00000068097	17	58138423	HEATR6	ENSG00000135929	2	219663244	CYP27A1	-0.34297	0.0349237	9.18517e-23	3
	ENSG00000068097	17	58138423	HEATR6	ENSG00000132846	5	76375522	ZBED3	0.19063	0.034929	4.82533e-08	3
	ENSG00000068097	17	58138423	HEATR6	ENSG00000157168	8	32059725	NRG1	-0.274445	0.0344133	1.52425e-15	3
	ENSG00000068097	17	58138423	HEATR6	ENSG00000165092	9	75605468	ALDH1A1	-0.277674	0.0349705	2.01778e-15	3
	ENSG00000068097	17	58138423	HEATR6	ENSG00000110079	11	60062229	MS4A4A	0.241407	0.0346025	3.02452e-12	3
	ENSG00000068097	17	58138423	HEATR6	ENSG00000111275	12	112226236	ALDH2	-0.24316	0.0351729	4.73566e-12	3
	ENSG00000068097	17	58138423	HEATR6	ENSG00000140090	14	92875760	SLC24A4	-0.21305	0.0342221	4.79994e-10	3
	ENSG00000167671	19	4451407	UBXN6	ENSG00000079308	2	218766115	TNS1	0.451495	0.032677	2.01611e-43	8
	ENSG00000167671	19	4451407	UBXN6	ENSG00000204010	10	91141387	IFIT1B	-0.196243	0.0305413	1.31428e-10	7
	ENSG00000167671	19	4451407	UBXN6	ENSG00000107521	10	100191319	HPS1	0.285859	0.0312757	6.24714e-20	5
	ENSG00000167671	19	4451407	UBXN6	ENSG00000108309	17	42390910	RUNDC3A	0.400894	0.02678	1.15499e-50	10
	ENSG00000167671	19	4451407	UBXN6	ENSG00000130300	19	17475208	PLVAP	0.411777	0.0289651	7.25675e-46	6
	ENSG00000167671	19	4451407	UBXN6	ENSG00000100325	22	30209434	ASCC2	0.328153	0.0304633	4.66289e-27	7
	ENSG00000105612	19	12989153	DNASE2	ENSG00000187017	1	6503139	ESPN	-0.141843	0.0169149	5.04209e-17	10
	ENSG00000105612	19	12989153	DNASE2	ENSG00000166169	10	103343333	POLL	-0.103012	0.0169939	1.34688e-09	10
	ENSG00000105612	19	12989153	DNASE2	ENSG00000206177	16	210329	HBM	0.147247	0.0170614	6.11033e-18	10
	ENSG00000105612	19	12989153	DNASE2	ENSG00000204815	17	40102268	TTC25	-0.111146	0.016889	4.67362e-11	11
	ENSG00000105612	19	12989153	DNASE2	ENSG00000100116	22	38208547	GCAT	-0.0986919	0.0168406	4.61919e-09	11
	ENSG00000105607	19	13013430	GCDH	ENSG00000166598	12	104335654	HSP90B1	0.234661	0.035865	6.03425e-11	3
	ENSG00000105607	19	13013430	GCDH	ENSG00000204815	17	40102268	TTC25	-0.143344	0.0239677	2.22135e-09	3
	ENSG00000105072	19	16619642	C19orf44	ENSG00000206561	3	15527449	COLQ	-0.289689	0.0522322	2.91998e-08	3
	ENSG00000130518	19	18376612	KIAA1683	ENSG00000157445	3	54632579	CACNA2D3	-0.0811472	0.0144973	2.1758e-08	3
	ENSG00000130518	19	18376612	KIAA1683	ENSG00000165092	9	75605468	ALDH1A1	-0.0869283	0.0147297	3.60103e-09	3
	ENSG00000130518	19	18376612	KIAA1683	ENSG00000060982	12	25033344	BCAT1	0.0824111	0.0144993	1.31733e-08	3
	ENSG00000130520	19	18425562	LSM4	ENSG00000151789	3	21937363	ZNF385D	0.240427	0.034663	4.03056e-12	3
	ENSG00000167491	19	19558189	GATAD2A	ENSG00000072422	10	62695197	RHOBTB1	0.121664	0.0182615	2.69555e-11	3
	ENSG00000167491	19	19558189	GATAD2A	ENSG00000134291	12	48360006	TMEM106C	-0.099687	0.0179276	2.68928e-08	3
	ENSG00000167491	19	19558189	GATAD2A	ENSG00000103740	15	78498920	ACSBG1	-0.12226	0.0180023	1.11089e-11	3
	ENSG00000167491	19	19558189	GATAD2A	ENSG00000108309	17	42390910	RUNDC3A	-0.226087	0.019044	1.65847e-32	3
	ENSG00000167491	19	19558189	GATAD2A	ENSG00000105507	19	48540260	CABP5	0.102518	0.0180778	1.42029e-08	3
	ENSG00000171051	19	52277894	FPR1	ENSG00000164659	7	86597618	KIAA1324L	-0.222416	0.0347182	1.49068e-10	3
	ENSG00000198053	20	1897848	SIRPA	ENSG00000174175	1	169578759	SELP	0.337956	0.0533594	2.39535e-10	3
	ENSG00000198053	20	1897848	SIRPA	ENSG00000119280	1	230989100	C1orf198	0.357379	0.0541886	4.24952e-11	3
	ENSG00000198053	20	1897848	SIRPA	ENSG00000185614	3	49841575	FAM212A	0.390376	0.0605954	1.1765e-10	3
	ENSG00000198053	20	1897848	SIRPA	ENSG00000153071	5	39417091	DAB2	0.394273	0.0593401	3.04658e-11	3
	ENSG00000198053	20	1897848	SIRPA	ENSG00000035403	10	75818895	VCL	0.338463	0.0536252	2.76114e-10	3
	ENSG00000198053	20	1897848	SIRPA	ENSG00000185340	22	29705673	GAS2L1	0.296829	0.0531191	2.29719e-08	3
	ENSG00000088826	20	4135010	SMOX	ENSG00000196517	1	44477155	SLC6A9	-0.319263	0.0256883	1.8343e-35	8
	ENSG00000088826	20	4135010	SMOX	ENSG00000162366	1	47652990	PDZK1IP1	0.23043	0.0269152	1.11564e-17	6
	ENSG00000088826	20	4135010	SMOX	ENSG00000163374	1	155644014	YY1AP1	0.190182	0.0255557	9.92649e-14	8
	ENSG00000088826	20	4135010	SMOX	ENSG00000185630	1	164696677	PBX1	0.151166	0.0239704	2.85666e-10	9
	ENSG00000088826	20	4135010	SMOX	ENSG00000162923	1	224598790	WDR26	-0.167129	0.0240351	3.56157e-12	9
	ENSG00000088826	20	4135010	SMOX	ENSG00000136732	2	127433877	GYPC	0.288844	0.0268515	5.48839e-27	7
	ENSG00000088826	20	4135010	SMOX	ENSG00000250361	4	144989550	GYPB	-0.218896	0.0332926	4.86787e-11	11
	ENSG00000088826	20	4135010	SMOX	ENSG00000146007	5	140082256	ZMAT2	-0.195603	0.0233366	5.21117e-17	8
	ENSG00000088826	20	4135010	SMOX	ENSG00000214253	7	100889168	FIS1	-0.220504	0.0401243	3.89584e-08	7
	ENSG00000088826	20	4135010	SMOX	ENSG00000172331	7	134348062	BPGM	-0.360204	0.0260409	1.62856e-43	8
	ENSG00000088826	20	4135010	SMOX	ENSG00000133742	8	86265540	CA1	-0.229141	0.0250794	6.4434e-20	8
	ENSG00000088826	20	4135010	SMOX	ENSG00000005238	9	35110054	FAM214B	-0.211961	0.0247624	1.13066e-17	9
	ENSG00000088826	20	4135010	SMOX	ENSG00000166169	10	103343333	POLL	0.159926	0.0258635	6.2702e-10	8
	ENSG00000088826	20	4135010	SMOX	ENSG00000223609	11	5255254	HBD	-0.169163	0.0234628	5.60219e-13	9
	ENSG00000088826	20	4135010	SMOX	ENSG00000167992	11	61044329	VWCE	0.155627	0.0254173	9.18905e-10	8
	ENSG00000088826	20	4135010	SMOX	ENSG00000060138	12	10863797	YBX3	0.161912	0.0272239	2.72417e-09	9
	ENSG00000088826	20	4135010	SMOX	ENSG00000022840	12	120993340	RNF10	-0.248551	0.0387891	1.47691e-10	8
	ENSG00000088826	20	4135010	SMOX	ENSG00000119636	14	74517811	CCDC176	-0.241238	0.0278212	4.2841e-18	8
	ENSG00000088826	20	4135010	SMOX	ENSG00000103148	16	161566	NPRL3	0.222153	0.025865	8.7767e-18	8
	ENSG00000088826	20	4135010	SMOX	ENSG00000169877	16	31539654	AHSP	0.178345	0.0267328	2.53353e-11	6
	ENSG00000088826	20	4135010	SMOX	ENSG00000103257	16	87883361	SLC7A5	-0.163168	0.0225777	4.93894e-13	10
	ENSG00000088826	20	4135010	SMOX	ENSG00000204815	17	40102268	TTC25	0.159664	0.0240827	3.36119e-11	9
	ENSG00000088826	20	4135010	SMOX	ENSG00000175931	17	74417410	UBE2O	-0.142116	0.0225705	3.04326e-10	11
	ENSG00000088826	20	4135010	SMOX	ENSG00000134779	18	34384572	TPGS2	0.142285	0.0250239	1.30088e-08	10
	ENSG00000088826	20	4135010	SMOX	ENSG00000066926	18	55234759	FECH	-0.201165	0.024084	6.67601e-17	10
	ENSG00000088826	20	4135010	SMOX	ENSG00000172270	19	577395	BSG	-0.153848	0.0249255	6.7287e-10	8
	ENSG00000088826	20	4135010	SMOX	ENSG00000198858	19	904871	R3HDM4	0.250842	0.0265721	3.72682e-21	9
	ENSG00000088826	20	4135010	SMOX	ENSG00000095932	19	3477472	C19orf77	0.24329	0.0277691	1.93222e-18	9
	ENSG00000088826	20	4135010	SMOX	ENSG00000167671	19	4451407	UBXN6	0.307237	0.0263257	1.80098e-31	8
	ENSG00000088826	20	4135010	SMOX	ENSG00000105281	19	47284995	SLC1A5	-0.179442	0.0245021	2.41491e-13	8
	ENSG00000088826	20	4135010	SMOX	ENSG00000132819	20	55975426	RBM38	-0.301935	0.0262967	1.62753e-30	6
	ENSG00000088826	20	4135010	SMOX	ENSG00000087460	20	57450510	GNAS	0.144745	0.0225198	1.29733e-10	10
	ENSG00000088826	20	4135010	SMOX	ENSG00000100104	22	26883871	SRRD	0.201138	0.0267186	5.15191e-14	6
	ENSG00000088826	20	4135010	SMOX	ENSG00000100325	22	30209434	ASCC2	0.249728	0.0247552	6.25004e-24	8
	ENSG00000088826	20	4135010	SMOX	ENSG00000102145	20	48648840	GATA1	0.264647	0.0452272	4.87141e-09	9
	ENSG00000101337	20	30726185	TM9SF4	ENSG00000134668	1	32268837	SPOCD1	0.526166	0.0833635	2.75976e-10	3
	ENSG00000204103	20	39316184	MAFB	ENSG00000119139	9	71803174	TJP2	0.268202	0.0354392	3.79219e-14	6
	ENSG00000204103	20	39316184	MAFB	ENSG00000172725	11	67208405	CORO1B	0.24976	0.0337906	1.45293e-13	7
	ENSG00000204103	20	39316184	MAFB	ENSG00000171860	12	8214982	C3AR1	0.441362	0.0534116	1.41575e-16	7
	ENSG00000204103	20	39316184	MAFB	ENSG00000104093	15	51827469	DMXL2	0.251435	0.0350541	7.34904e-13	6
	ENSG00000240849	20	48733999	TMEM189	ENSG00000014914	1	149904667	MTMR11	-0.367655	0.0597449	7.5675e-10	5
	ENSG00000240849	20	48733999	TMEM189	ENSG00000160789	1	156081122	LMNA	0.826095	0.0830272	2.52964e-23	4
	ENSG00000240849	20	48733999	TMEM189	ENSG00000111144	12	96415952	LTA4H	-0.352056	0.0589012	2.27199e-09	5
	ENSG00000172216	20	48808294	CEBPB	ENSG00000014914	1	149904667	MTMR11	0.350551	0.0469934	8.68091e-14	3
	ENSG00000172216	20	48808294	CEBPB	ENSG00000160789	1	156081122	LMNA	-0.262013	0.0466796	1.98844e-08	3
	ENSG00000172216	20	48808294	CEBPB	ENSG00000204634	2	101746703	TBC1D8	0.291564	0.0462615	2.92848e-10	3
	ENSG00000172216	20	48808294	CEBPB	ENSG00000153208	2	112721597	MERTK	0.293419	0.0460276	1.83145e-10	3
	ENSG00000172216	20	48808294	CEBPB	ENSG00000157445	3	54632579	CACNA2D3	0.392668	0.0474246	1.23348e-16	3
	ENSG00000172216	20	48808294	CEBPB	ENSG00000125089	4	8213314	SH3TC1	0.292921	0.0462956	2.49651e-10	3
	ENSG00000172216	20	48808294	CEBPB	ENSG00000113231	5	76615953	PDE8B	0.336398	0.0467221	6.02237e-13	3
	ENSG00000172216	20	48808294	CEBPB	ENSG00000104714	8	626426	ERICH1	0.254929	0.0454647	2.05653e-08	3
	ENSG00000172216	20	48808294	CEBPB	ENSG00000165092	9	75605468	ALDH1A1	0.311087	0.0463125	1.85349e-11	3
	ENSG00000172216	20	48808294	CEBPB	ENSG00000133661	10	81719933	SFTPD	0.345926	0.0501788	5.42904e-12	3
	ENSG00000172216	20	48808294	CEBPB	ENSG00000110079	11	60062229	MS4A4A	0.433805	0.0504646	8.23799e-18	3
	ENSG00000172216	20	48808294	CEBPB	ENSG00000149577	11	117058804	SIDT2	0.351004	0.0465212	4.52147e-14	3
	ENSG00000172216	20	48808294	CEBPB	ENSG00000134531	12	13359679	EMP1	-0.365532	0.0468447	6.04289e-15	3
	ENSG00000172216	20	48808294	CEBPB	ENSG00000090376	12	66615530	IRAK3	0.324226	0.0481957	1.72869e-11	3
	ENSG00000172216	20	48808294	CEBPB	ENSG00000111144	12	96415952	LTA4H	0.382569	0.0463873	1.62054e-16	3
	ENSG00000172216	20	48808294	CEBPB	ENSG00000111275	12	112226236	ALDH2	0.405257	0.0465028	2.91621e-18	3
	ENSG00000172216	20	48808294	CEBPB	ENSG00000166165	14	103987722	CKB	0.334183	0.0472762	1.56357e-12	3
	ENSG00000172216	20	48808294	CEBPB	ENSG00000166068	15	38596988	SPRED1	0.370432	0.0473922	5.43941e-15	3
	ENSG00000172216	20	48808294	CEBPB	ENSG00000182853	17	4689154	VMO1	0.339045	0.0468139	4.40816e-13	3
	ENSG00000132819	20	55975426	RBM38	ENSG00000086506	16	230816	HBQ1	0.364156	0.0474642	1.69041e-14	8
	ENSG00000132819	20	55975426	RBM38	ENSG00000090674	19	7593203	MCOLN1	0.375553	0.0470817	1.50396e-15	8
	ENSG00000101162	20	57598009	TUBB1	ENSG00000127824	2	220128662	TUBA4A	0.432514	0.033433	2.79246e-38	15
	ENSG00000101162	20	57598009	TUBB1	ENSG00000167553	12	49624816	TUBA1C	0.410089	0.0516506	2.02719e-15	11
	ENSG00000099995	22	30740457	SF3A1	ENSG00000189283	3	60486084	FHIT	-0.280957	0.0486033	7.44276e-09	3
	ENSG00000241878	22	32036447	PISD	ENSG00000012223	3	46501930	LTF	0.11701	0.019799	3.42364e-09	5
	ENSG00000241878	22	32036447	PISD	ENSG00000118113	11	102590153	MMP8	0.134675	0.0208866	1.13398e-10	4
	ENSG00000241878	22	32036447	PISD	ENSG00000102837	13	53614513	OLFM4	0.119221	0.0199734	2.38748e-09	5
	ENSG00000241878	22	32036447	PISD	ENSG00000086548	19	42265499	CEACAM6	0.130585	0.0206633	2.62119e-10	4
	ENSG00000128245	22	32347018	YWHAH	ENSG00000148346	9	130913542	LCN2	0.44139	0.0579532	2.61022e-14	6
	ENSG00000167074	22	41779333	TEF	ENSG00000049246	1	7874808	PER3	0.171855	0.0202788	2.35898e-17	3
	ENSG00000167074	22	41779333	TEF	ENSG00000117322	1	207645407	CR2	0.134952	0.0188609	8.36063e-13	3
	ENSG00000167074	22	41779333	TEF	ENSG00000197520	1	222917348	FAM177B	0.112157	0.0187662	2.27937e-09	3
	ENSG00000167074	22	41779333	TEF	ENSG00000143819	1	226015527	EPHX1	0.21083	0.0202853	2.66057e-25	3
	ENSG00000167074	22	41779333	TEF	ENSG00000135945	2	100061717	REV1	0.20554	0.0204441	8.84461e-24	3
	ENSG00000167074	22	41779333	TEF	ENSG00000128656	2	175767094	CHN1	0.190513	0.0203948	9.5175e-21	3
	ENSG00000167074	22	41779333	TEF	ENSG00000080822	3	98229333	CLDND1	0.141019	0.0203558	4.27762e-12	3
	ENSG00000167074	22	41779333	TEF	ENSG00000112941	5	6735939	PAPD7	0.178679	0.0203437	1.59131e-18	3
	ENSG00000167074	22	41779333	TEF	ENSG00000131507	5	141511039	NDFIP1	0.15476	0.0202917	2.4075e-14	3
	ENSG00000167074	22	41779333	TEF	ENSG00000112394	6	111476502	SLC16A10	0.178007	0.0203574	2.24814e-18	3
	ENSG00000167074	22	41779333	TEF	ENSG00000176209	8	42402224	SMIM19	0.134435	0.0204265	4.66115e-11	3
	ENSG00000167074	22	41779333	TEF	ENSG00000132274	11	5734619	TRIM22	0.13318	0.0193768	6.27882e-12	3
	ENSG00000167074	22	41779333	TEF	ENSG00000076248	12	109542088	UNG	0.121786	0.0188995	1.16446e-10	3
	ENSG00000167074	22	41779333	TEF	ENSG00000131797	16	31716504	CLUHP3	0.187545	0.0236414	2.14057e-15	3
	ENSG00000167074	22	41779333	TEF	ENSG00000157349	16	70346376	DDX19B	0.185189	0.0222746	9.25796e-17	3
	ENSG00000167074	22	41779333	TEF	ENSG00000108852	17	41969896	MPP2	0.124246	0.0202201	8.0113e-10	3
	ENSG00000167074	22	41779333	TEF	ENSG00000175556	22	118132734	LONRF3	0.442598	0.0375013	3.80301e-32	3
	ENSG00000167077	22	42145481	MEI1	ENSG00000049246	1	7874808	PER3	0.19334	0.0230575	5.06702e-17	3
	ENSG00000167077	22	42145481	MEI1	ENSG00000197520	1	222917348	FAM177B	0.138627	0.0231228	2.03165e-09	3
	ENSG00000167077	22	42145481	MEI1	ENSG00000143819	1	226015527	EPHX1	0.221349	0.0230048	6.46512e-22	3
	ENSG00000167077	22	42145481	MEI1	ENSG00000128656	2	175767094	CHN1	0.231971	0.023121	1.09253e-23	3
	ENSG00000167077	22	42145481	MEI1	ENSG00000112941	5	6735939	PAPD7	0.195899	0.0233701	5.183e-17	3
	ENSG00000167077	22	42145481	MEI1	ENSG00000131507	5	141511039	NDFIP1	0.17277	0.0231402	8.25201e-14	3
	ENSG00000167077	22	42145481	MEI1	ENSG00000112394	6	111476502	SLC16A10	0.194978	0.0229146	1.75585e-17	3
	ENSG00000167077	22	42145481	MEI1	ENSG00000176209	8	42402224	SMIM19	0.155274	0.0259531	2.19235e-09	3
	ENSG00000167077	22	42145481	MEI1	ENSG00000132274	11	5734619	TRIM22	0.153929	0.0231953	3.2178e-11	3
	ENSG00000167077	22	42145481	MEI1	ENSG00000076248	12	109542088	UNG	0.145132	0.0240684	1.63965e-09	3
	ENSG00000167077	22	42145481	MEI1	ENSG00000131797	16	31716504	CLUHP3	0.185498	0.0271404	8.21503e-12	3
	ENSG00000167077	22	42145481	MEI1	ENSG00000157349	16	70346376	DDX19B	0.199256	0.0252944	3.34102e-15	3
	ENSG00000198951	22	42460602	NAGA	ENSG00000128656	2	175767094	CHN1	-0.227502	0.0404039	1.7948e-08	3

## Sheet: Table S3
	Table S3. The outcome of simulation analysis based on 1000 randomly generated genesets: biological processes that are overrepresented in each gene set
	Geneset number	Go term	Description	Fold Enrichment	P-value	Bonferroni corrected P-value
	740	GO:0009060	Aerobic respiration	3.51271	0.0148699	1
	740	GO:0045333	Cellular respiration	3.11974	0.0237992	1
	231	GO:1905323	Telomerase holoenzyme complex assembly	21.392	0.025694	1
	712	GO:0035308	Negative regulation of protein dephosphorylation	8.10285	0.0405503	1

## Sheet: Table S4
	Table S4. Higher expression of ALDH2 is associated with higher risk of obesity
	Trait	Source	B	SE	P	NSNP
	Arm fat-free mass (left)	UKBB	0.0224343	0.00347405	1.06315e-10	25
	Arm fat-free mass (right)	UKBB	0.0161407	0.00346638	3.21851e-06	23
	Arm predicted mass (left)	UKBB	0.0225082	0.00345998	7.75419e-11	25
	Arm predicted mass (right)	UKBB	0.0191746	0.00339359	1.60211e-08	25
	Basal metabolic rate	UKBB	0.0233724	0.00355617	4.95211e-11	26
	Body mass index	PMID: 30124842	0.0243086	0.00425794	1.13631e-08	16
	Impedance of whole body	UKBB	-0.0241153	0.00410508	4.24143e-09	28
	Leg fat-free mass (left)	UKBB	0.0218908	0.00349346	3.69861e-10	26
	Leg fat-free mass (right)	UKBB	0.0216136	0.00349633	6.33679e-10	25
	Leg predicted mass (left)	UKBB	0.0218805	0.00347244	2.95384e-10	26
	Leg predicted mass (right)	UKBB	0.0223552	0.00345361	9.60819e-11	26
	Trunk fat-free mass	UKBB	0.0196961	0.00343321	9.64072e-09	25
	Trunk predicted mass	UKBB	0.0196031	0.00342168	1.00976e-08	25
	Whole body fat-free mass	UKBB	0.022251	0.00340757	6.58321e-11	26
	Whole body water mass	UKBB	0.0227556	0.00341389	2.63632e-11	26
